# Supplementary material for: Direct U–Pb dating of carbonates from micron-scale femtosecond laser ablation inductively coupled plasma mass spectrometry images using robust regression
Source: Copernicus journal article supplement (doi:10.5194/gchron-3-67-2021), 2021-02-03
Supplement: Supplementary file 1 [file gchron-3-67-2021-supplement.zip]

Archive with 3 entries (3 files):
- gchron-3-67-2021-supplement-title-page.pdf
- Supplementary-material-Hoareau-et-al-Final.pdf
- Electronic-supplement-Hoareau-et-al-Final.xlsx
