# Supplementary material for: Direct U–Pb dating of carbonates from micron-scale femtosecond laser ablation inductively coupled plasma mass spectrometry images using robust regression
Source: Copernicus journal article supplement (doi:10.5194/gchron-3-67-2021), 2021-02-03
Supplement: Supplementary file 1 [file gchron-3-67-2021-supplement.zip › Electronic-supplement-Hoareau-et-al-Final.xlsx]

## Sheet: Duff Brown 1
Table S1
This file presents the isotopic images, in number of counts, for the masses 238, 232, 208, 207, 206, for samples Duff Brown, BH14, PXG20-1, PXG32-2, ETC2, ARB and C6-265-D5 .
Each sheet corresponds to one sample.
The counts are corrected for drift by sample standard bracketing, using NIST612.
The correction factor of the 238U/206Pb ratio, as calculated from the lower intercept of WC-1 standard in TW plot, is indicated on the first line (the ratio must be multiplied by this factor for age calculation)
Duff Brown 1		WC1 Correction factor : 1.01725
238
7.19167e+06	7.88313e+06	6.99107e+06	7.18317e+06	1.0123e+07	7.63951e+06	8.94969e+06	9.31034e+06	1.02733e+07	7.28862e+06	8.1407e+06	1.08623e+07	1.33907e+07	8.88729e+06	7.44923e+06	8.26007e+06	1.09617e+07	1.00678e+07	9.6794e+06	5.7456e+06	5.69122e+06	6.64626e+06	6.56566e+06	6.18804e+06	7.08076e+06	8.9285e+06	8.34006e+06	9.97145e+06	8.39773e+06	7.96554e+06	7.69285e+06	8.13581e+06	8.66307e+06	6.43172e+06	6.07954e+06	8.81519e+06	8.85456e+06	8.78911e+06
7.2128e+06	7.25044e+06	6.69416e+06	9.43394e+06	9.03639e+06	1.02339e+07	8.96851e+06	9.97328e+06	9.30777e+06	9.89448e+06	1.02424e+07	9.37092e+06	6.46808e+06	7.15045e+06	8.29581e+06	1.14393e+07	1.03896e+07	9.18728e+06	9.28969e+06	8.01282e+06	5.82116e+06	6.64746e+06	7.30498e+06	7.95102e+06	6.87714e+06	8.65517e+06	9.23879e+06	9.503e+06	8.88597e+06	8.77823e+06	9.90543e+06	8.85701e+06	1.00576e+07	8.90669e+06	8.85578e+06	8.68186e+06	8.35038e+06	6.79837e+06
6.32384e+06	7.3062e+06	7.86068e+06	9.73088e+06	8.85581e+06	9.26061e+06	9.13334e+06	1.06569e+07	9.46641e+06	1.21314e+07	1.12114e+07	1.20447e+07	1.08799e+07	8.96243e+06	8.27157e+06	9.07332e+06	1.03909e+07	1.1075e+07	9.15877e+06	9.69576e+06	1.03969e+07	1.1072e+07	8.73459e+06	1.15793e+07	1.01169e+07	1.14223e+07	1.06733e+07	1.05745e+07	1.07865e+07	9.93815e+06	1.09799e+07	9.65757e+06	1.04048e+07	1.07472e+07	8.35826e+06	8.37097e+06	7.76435e+06	8.79276e+06
6.94903e+06	7.39287e+06	6.67453e+06	7.19592e+06	8.57277e+06	6.98624e+06	9.98845e+06	1.02205e+07	9.03698e+06	6.98563e+06	8.2843e+06	9.7551e+06	1.24398e+07	1.21641e+07	1.11399e+07	1.01599e+07	1.16308e+07	1.12126e+07	1.15805e+07	9.96661e+06	1.03393e+07	1.09023e+07	1.14405e+07	1.11993e+07	1.00612e+07	9.75514e+06	8.06918e+06	1.14587e+07	1.12395e+07	9.77087e+06	8.74246e+06	9.90361e+06	9.37455e+06	1.04284e+07	1.18386e+07	8.48612e+06	1.03527e+07	8.97456e+06
6.10445e+06	6.20385e+06	6.78746e+06	7.91585e+06	7.08319e+06	8.36718e+06	9.35576e+06	8.95638e+06	4.63281e+06	4.34296e+06	4.91645e+06	9.47697e+06	1.23107e+07	1.349e+07	1.03187e+07	1.20998e+07	9.68177e+06	1.15229e+07	9.99204e+06	1.15581e+07	9.68182e+06	1.12932e+07	1.07993e+07	1.1758e+07	9.65333e+06	1.17908e+07	1.20574e+07	8.98061e+06	9.3438e+06	9.62608e+06	1.0989e+07	1.00878e+07	9.0267e+06	1.32076e+07	8.55705e+06	1.08678e+07	9.51331e+06	1.06333e+07
5.2403e+06	5.51474e+06	6.34175e+06	9.1394e+06	9.0309e+06	1.07515e+07	8.54914e+06	1.19441e+07	1.07484e+07	1.05805e+07	1.26604e+07	1.33137e+07	1.06102e+07	8.98243e+06	1.13866e+07	1.25986e+07	1.14478e+07	1.07163e+07	1.12199e+07	9.22907e+06	1.15023e+07	9.89937e+06	1.06357e+07	1.07381e+07	9.79997e+06	1.12654e+07	1.15532e+07	1.10829e+07	1.27036e+07	1.00909e+07	9.36605e+06	9.61333e+06	1.1452e+07	1.24416e+07	1.31652e+07	1.08448e+07	9.01211e+06	9.21155e+06
6.29983e+06	5.4484e+06	7.06743e+06	8.41097e+06	8.11095e+06	9.81995e+06	1.00242e+07	9.66843e+06	7.35608e+06	9.15212e+06	7.82131e+06	7.83283e+06	6.53293e+06	8.90605e+06	1.02678e+07	1.09066e+07	9.27332e+06	9.6988e+06	7.32559e+06	8.50492e+06	1.06193e+07	1.00291e+07	1.06569e+07	1.20392e+07	1.06224e+07	1.23331e+07	1.07496e+07	1.20774e+07	1.11453e+07	1.19568e+07	1.09908e+07	1.06454e+07	1.06551e+07	1.23313e+07	9.57758e+06	1.22877e+07	9.45092e+06	8.66911e+06
4.06754e+06	5.10482e+06	6.61586e+06	7.32682e+06	9.50424e+06	1.05896e+07	1.14017e+07	1.01757e+07	9.4304e+06	8.49037e+06	7.76436e+06	7.87102e+06	5.54522e+06	4.68706e+06	5.24259e+06	7.26074e+06	8.23217e+06	6.96258e+06	6.12678e+06	7.45193e+06	9.61817e+06	1.0552e+07	1.11151e+07	1.09696e+07	1.35767e+07	1.036e+07	9.6418e+06	1.15835e+07	1.32057e+07	8.78428e+06	1.18059e+07	1.00672e+07	1.10332e+07	1.0669e+07	1.08284e+07	1.03375e+07	7.03048e+06	8.32593e+06
6.21293e+06	6.43384e+06	6.41429e+06	6.5744e+06	8.96001e+06	1.01187e+07	1.29241e+07	9.64483e+06	1.06777e+07	8.23221e+06	8.74062e+06	8.49278e+06	7.80374e+06	7.0693e+06	4.62835e+06	5.42718e+06	5.45726e+06	4.89989e+06	5.53506e+06	9.3788e+06	1.03654e+07	1.16053e+07	1.2132e+07	1.21496e+07	9.93273e+06	1.03387e+07	9.01092e+06	1.11647e+07	9.03835e+06	1.15981e+07	9.46788e+06	9.07274e+06	9.27157e+06	9.13882e+06	8.80127e+06	9.61025e+06	1.03939e+07	1.04333e+07
6.9917e+06	6.19923e+06	9.14669e+06	6.32309e+06	9.43274e+06	9.36909e+06	1.08745e+07	8.17948e+06	9.80025e+06	1.04727e+07	9.70969e+06	9.66603e+06	9.88422e+06	6.88503e+06	7.31905e+06	6.60499e+06	6.59999e+06	9.48544e+06	1.0386e+07	1.0206e+07	8.52612e+06	7.26195e+06	1.03763e+07	1.04217e+07	1.03666e+07	1.03624e+07	1.15945e+07	1.17392e+07	1.07443e+07	1.01096e+07	9.7957e+06	1.08696e+07	1.1998e+07	1.07272e+07	1.08848e+07	1.13623e+07	1.16489e+07	1.15562e+07
6.87152e+06	8.55762e+06	7.99037e+06	9.6509e+06	8.28431e+06	9.15274e+06	9.83088e+06	1.06739e+07	8.60067e+06	1.00115e+07	1.09326e+07	1.07175e+07	8.95091e+06	9.39577e+06	9.2103e+06	1.11678e+07	1.02114e+07	1.03332e+07	1.02945e+07	1.01587e+07	6.75956e+06	5.75995e+06	1.0066e+07	1.20738e+07	1.03314e+07	1.3801e+07	1.07151e+07	1.32313e+07	1.24383e+07	1.13265e+07	1.21786e+07	9.9727e+06	1.25162e+07	1.08945e+07	9.83937e+06	1.17653e+07	1.18562e+07	1.21665e+07
7.16802e+06	7.03511e+06	8.71159e+06	7.78677e+06	9.64301e+06	9.1146e+06	7.76617e+06	7.8698e+06	8.82989e+06	9.98601e+06	1.68068e+07	1.22162e+07	8.45641e+06	7.61467e+06	8.23824e+06	8.87336e+06	1.54838e+07	1.00872e+07	1.29925e+07	1.07732e+07	8.36617e+06	3.43207e+06	6.20252e+06	8.79158e+06	1.32925e+07	1.23495e+07	1.29004e+07	1.27986e+07	1.09687e+07	1.24956e+07	1.52948e+07	1.21374e+07	1.11575e+07	1.02145e+07	1.00072e+07	1.32004e+07	1.17466e+07	1.19162e+07
6.84683e+06	6.50036e+06	7.03714e+06	7.66375e+06	7.13711e+06	8.3831e+06	7.42134e+06	7.78191e+06	6.18768e+06	8.03283e+06	6.15481e+06	1.10223e+07	1.00848e+07	1.09078e+07	9.75812e+06	1.05284e+07	8.45825e+06	1.11229e+07	1.0566e+07	1.09054e+07	9.81632e+06	1.02927e+07	9.45758e+06	1.25362e+07	1.29695e+07	1.351e+07	1.14599e+07	1.30853e+07	1.20657e+07	1.2704e+07	1.27216e+07	1.00097e+07	1.20592e+07	1.24913e+07	9.96543e+06	9.1679e+06	7.46498e+06	1.0863e+07
7.87221e+06	5.78697e+06	5.67088e+06	7.0056e+06	8.20917e+06	8.88126e+06	7.27345e+06	8.61398e+06	8.77515e+06	7.04441e+06	8.47158e+06	8.40068e+06	9.75208e+06	9.4224e+06	9.43755e+06	9.43697e+06	6.16947e+06	6.21074e+06	1.19526e+07	1.18028e+07	1.11532e+07	1.14144e+07	1.18593e+07	1.36422e+07	1.49912e+07	1.1072e+07	9.21395e+06	1.16041e+07	1.29079e+07	1.39131e+07	1.2612e+07	1.13841e+07	1.17914e+07	1.12817e+07	9.03577e+06	1.0966e+07	1.05756e+07	1.28604e+07
5.86309e+06	4.63254e+06	5.77842e+06	6.24014e+06	7.82612e+06	7.36741e+06	8.08311e+06	8.63034e+06	8.57641e+06	8.39764e+06	1.02605e+07	1.00502e+07	9.26547e+06	1.01842e+07	1.10732e+07	9.63028e+06	7.7807e+06	1.00563e+07	9.86362e+06	9.27882e+06	9.02365e+06	1.29701e+07	1.18017e+07	1.1635e+07	1.31071e+07	1.28616e+07	1.02472e+07	1.23035e+07	1.18095e+07	1.25247e+07	1.25713e+07	1.35501e+07	1.12247e+07	1.29616e+07	1.17641e+07	1.35301e+07	1.29362e+07	1.29574e+07
6.92851e+06	6.17682e+06	5.99665e+06	7.08197e+06	8.12736e+06	1.01775e+07	9.20969e+06	1.02848e+07	9.47264e+06	1.07175e+07	9.68848e+06	1.11781e+07	1.05351e+07	1.19229e+07	1.08514e+07	1.24586e+07	9.97027e+06	8.81154e+06	9.77512e+06	1.04593e+07	1.13472e+07	1.10587e+07	9.47938e+06	1.10138e+07	1.31712e+07	1.19671e+07	1.08169e+07	9.31274e+06	8.35201e+06	1.0229e+07	1.1309e+07	1.31494e+07	1.29356e+07	1.1215e+07	1.20677e+07	1.29665e+07	9.5224e+06	1.0626e+07
5.55096e+06	5.31682e+06	7.00864e+06	6.72505e+06	9.24425e+06	9.20119e+06	9.52239e+06	9.6424e+06	8.39634e+06	1.02436e+07	8.99885e+06	8.80912e+06	1.0586e+07	1.14853e+07	1.07254e+07	1.2761e+07	1.06593e+07	8.43157e+06	8.4146e+06	1.02169e+07	1.15944e+07	1.25307e+07	9.3812e+06	9.93752e+06	6.51227e+06	6.72988e+06	6.67415e+06	1.02042e+07	9.94704e+06	1.1469e+07	9.10488e+06	1.07605e+07	1.14199e+07	1.22629e+07	1.17944e+07	1.19126e+07	1.12229e+07	1.25774e+07
235
47690.4	56615.3	48695.1	50543.5	69355.8	59127.7	68214.2	64857.2	75593.1	56068.4	60839.8	81643.4	102780	63762	50315.4	57644.2	77759.8	71890.4	74086.7	40365.1	38608	50155.5	46321.4	45157.7	51136.9	65314.5	61182.5	73330.3	60249.9	55040.1	54378.6	59195.1	61685	48215.5	46663.3	59377.9	62916.7	64902.8
50659.7	52780.5	48010.1	65747.5	62437	72075.2	62939.3	72463.2	66276.8	67598.2	75179.4	64538.8	46229.6	50497.8	61593.1	80364	76915.2	65382.1	64971.5	58282	41461	44929.4	53146.3	58350.8	50452.1	61615.4	66525	69424.1	62675	60131	71822.6	65154.6	71410.6	62712	64263.7	61021.5	62528.7	46892
47120.3	53511.4	58100	69220.8	64332.2	63921.8	61089.8	77556.8	69721.1	89481.8	81300.2	85230.2	76618.4	64058.2	56113.2	66273.1	76231.2	82328.3	70705.5	71000.9	72598.9	79565.1	63190.9	85640.8	71822.6	84018.8	83976.4	78354.2	76325.8	70178.1	80797.8	68465.2	70679.8	81668.2	58396.2	62437.2	54037.5	59060.1
48101.4	55040.2	49265.7	50931.9	60177	50749.2	70546.9	73832.6	65310.5	48489.4	59880.3	69195.2	87013	89913.9	83837.4	70953.7	85115.1	79404.8	83105.2	72415.5	71548.1	78241	83952.7	82328.8	72780.8	70589.1	55679.2	80115.2	80005.1	77372.1	66182.1	70657.4	67438.3	70020.9	84407.8	63213.5	71822.6	64263.5
46047.8	42464.6	49151	57940.2	52187.5	56481	63784.3	63556	33540.2	33246.8	34797.9	65773.7	89617.3	100267	71685.3	85917.6	67918.2	84430.4	69127.4	84362	69469.2	79222	79405.4	83129.4	70315.1	82785.4	87789.5	65587.8	64606	69630.3	73787.9	71595.2	65270.1	93478.6	62486.8	80685.3	69310.7	77281.6
37855.3	38904.7	45135	63852.8	62048.6	77714.7	59994.4	87355.7	76952.3	79086.5	91901.9	95606.4	80341.2	60519.1	82647.8	89890.7	84843.3	78310.3	81643.6	67438.3	82103.4	71731.5	74996.7	79954.6	69082	83265.5	81277.7	78216.2	87680.7	72644.6	68533.8	66890.1	81118.5	85573.8	94026.2	79885.6	65108.2	64195.9
44839.6	38745.8	49699.5	58854.1	56158.6	74814.3	72552.8	71959.7	51352.3	65040.9	55337.4	56159.2	46412.3	61707.6	74836.7	80707.2	68739.2	67871.2	54264.3	58058.2	76549.9	72210.7	70200.4	85024.8	77715.1	89983.3	78514.4	90804.9	81179.3	86555.6	78264	77143.2	77302.8	89870.5	69541.1	90554.8	68739.4	63395.9
32197.4	39613	45113.2	54058.4	69996	76871.6	85139.9	72165.4	66484.7	59560.6	56364.3	56228.1	39178.9	37627.3	37992.5	50543.8	58761.5	56415.8	44473.5	48537.2	69881.2	72256.3	84613.3	77349.9	102392	71893.4	69790.3	82331.4	98552.6	61705.8	85483.4	72369.7	78996.8	76115.5	77188.9	76459.3	49379.7	59401.4
45385.8	44336.5	48147	47075	63578.1	70408	96129.1	66135.8	75410.7	64812	62847.7	56820.4	55976.1	51731.2	32539.6	39931.6	38744.9	37969.5	39019	67487.6	76778.7	83150.7	89869.3	90987.6	69493.5	76390.2	68649.2	80502	63301	81940	66729.6	66409.9	64834.7	60062.7	59424.9	70886	71777.4	76596.4
46526.6	46024.4	67895.1	43834.4	65977.3	66592.4	77258.1	56182.8	69643.1	76001	73627.1	71844.9	75658.5	50109.7	52918.7	44655	47212.2	69629.4	78902.8	70749	61707.9	50293.1	72373	77260.7	75980	74586.7	81346.5	88109.2	77421.5	77376.1	66775.5	79795.3	87861.7	76778.6	82169.3	81986.4	80845.4	82032.3
48580.6	62553.5	57186.1	71091.5	62278.3	59971	67962.6	77989.8	61762.2	70248.5	78744.2	79473.3	62460.1	68534.4	66341.4	80158	72644.9	74403.2	73854.8	74174.4	48695.2	43651.4	66937	86485.6	73467.8	100838	74128.1	95855	88987.1	79793	87583.4	69514.9	91102.1	76412.8	69174.7	83836.1	89387.8	82397.4
49334	56869.3	59768.5	55383.6	70453.6	65840	57734.8	52940.4	65833.2	72668.4	120362	90087.8	63624.2	53648.3	58624.8	64537.8	111337	69653.2	93456.4	78103.8	62873.9	25468.5	45431.4	62506.6	96497	87332.3	94965.5	93113	81444.8	85234.1	113159	86556.3	79954.9	74244.4	70292.9	95444.2	87881.1	83678
53054.4	47896.4	49174.1	56959	50337.9	58533.4	54401.1	52255.1	42223.4	55863.8	44200.3	76505.1	71457.1	77828.3	70360.1	78857.3	61409.9	77442	75293.3	76252.3	70749.5	77143	67483.4	88360	88885.7	98232	82763.9	93068.1	91157.1	95307	89662.2	72142.8	81416.4	90118.8	68739.6	64493.7	44929.4	76186.4
59377.9	39521	40114.6	53968.7	57277.8	61981.2	53671.1	62712	64476.6	48832.2	60611	59470.1	67368.7	71456.4	66501.7	69333.9	46208.1	45522.8	87113.1	90213.2	79610.9	82396.8	86920.8	99260.7	110257	84824.1	67255.6	80342.5	98755.1	100906	92724.3	82511.2	83312.5	79930.3	67323.6	77031.2	78058.1	95501.5
41574.3	31057.3	42898	44337.2	57231.7	52118.7	58213.6	61478.4	63666.9	55955.3	75361.9	67254.7	66113.1	76347.9	81896.4	67941.9	55816.4	70543.4	71826.6	65360.6	63008.2	96543.4	84523.4	83038.1	98186.3	92221.8	74859.6	87445.9	84993.2	89276.8	88565.5	99946.4	78447.1	95809.6	82146.9	93660.8	96060.8	92312.8
49449.3	42762.6	39475.4	48671.8	62346.3	74677.4	67939.4	73512.2	67137.5	74632	67186.7	79542.6	76801	89640.2	80295.7	87400.5	73237.1	63076.1	70748.9	73511.7	76917.3	78811.9	62825.3	75727.1	95559.3	87925.9	78399.9	70040.3	57952.3	70771.4	76686.9	94644.8	89753.9	78948.1	87106.2	98257.1	68008.2	75454
44748.2	36372.4	50474.9	46914.9	66455.5	64743.4	65131.3	69469.6	62127.4	66045.2	66529.8	61730.8	75909.7	83883.6	75910.2	89688.1	74220.7	61615.8	60222.8	75842.3	80456.7	88475.7	67393.3	70795.2	45638.3	47644.9	47256.9	72854.6	71026.6	83746.1	64446.1	80410.2	77807.1	87743.8	80935.1	88931.8	80226.8	86212.7
232
66976.1	10421.2	13268.2	12821.1	12421.2	11456.4	11785.9	14185.7	15110.4	10585.8	7291.83	4468.8	5880.53	6327.53	14280.3	11950.5	17645.2	17198	16586.3	6068.68	5786.35	11832.8	7762.6	5551.03	8091.95	11903.5	10468.3	15550.8	14464.9	13338.7	10868.2	13503.5	14280.3	10962.3	11856.4	13409.5	12350.3	13526.7
11738.9	10091.7	9997.7	14374.2	13809.6	15339.2	13127	15126.9	14384.2	20894.4	15691.9	11880.1	7386.08	9150.78	11809.4	18916	16280	11950.5	13009.5	9950.68	5786.27	8986.1	10162.4	11550.5	8844.69	10468.3	12844.6	12821.1	14007.7	11762.3	12962.4	13433.2	13386	15950.9	14374.2	13362.6	12585.8	10680.2
8915.25	10868.2	16609.6	17433.2	16303.8	12891.7	15433.1	16186	12905.2	35395.1	19504.3	18727.6	15668.3	16115.4	15950.8	12727.2	12633.1	18022	15762.6	14492	13762.4	18680.6	12279.8	15456.8	15433	16821.7	12962.4	12538.7	15352.3	14279.9	14186	12962.1	11785.9	12609.5	12209.3	14185.9	12068.4	12138.8
14421.2	12656.5	12374.1	11644.7	12138.7	9856.5	11032.9	9080.21	10162.3	7997.77	10186.1	16845.1	22940.4	20917.3	14397.8	12679.9	15386.1	16092	19245.3	15997.9	14209.3	15856.6	16491.9	14444.8	14656.4	16609.9	14727.2	17221.4	15809.5	14209.3	12632.9	12821	12091.7	15527.3	12444.6	18941.3	20116.4	14209.5
14821.1	13009.6	16091.8	13103.6	13503.4	14939	16468.7	10891.6	7607.87	5974.57	6633.27	14374.5	23434.6	23057.8	13009.4	13715.4	15480.1	20986.9	19386.4	19927.8	15338.9	15950.8	13268.3	15974.5	13715.3	17692.2	16539.1	13785.9	12716.9	10797.6	10421.3	10421.2	9715.3	11362.4	10609.6	41848.7	12680	17386.4
8868.23	11667.9	12985.8	20422.1	19857.5	18586.4	12915.3	20140.1	18310.9	20327.9	21810.8	23811.2	13903.4	7621.39	14232.9	15527.3	18868.8	18374.6	22587.2	18774.8	16327.4	13550.6	11785.8	15456.7	16045	19339.3	19951.4	19033.5	20112.8	30122.8	19905	16892.1	19175	19363.2	20351.5	17622	14515.4	14374.3
13644.9	18539.4	14515.4	15221.2	12891.7	15668.3	17433.3	16304	12474.7	14021	12256.4	9786.01	9856.57	11809.3	16845.1	14632.9	11597.5	14844.9	12303.5	11644.7	16303.7	14915.4	14609.4	19198.2	22210.9	22187.1	21410.7	22869.7	19144.4	18468.8	16844.9	15221.4	21363.6	26329.7	18939.3	20798.8	16515.9	14421.1
15150.8	16515.5	10138.7	8468.46	12727.1	13103.4	14915.5	15927.2	12582.5	12374	12727	12821.1	8609.59	6586.04	7950.96	7362.61	11691.8	10280	8068.4	8845.25	14797.8	16821.4	17315.5	17762.9	25694.1	19434.1	18092.3	21858	24174.9	13950.6	19127.9	18210	24588.1	23693.7	21881.3	20092.7	20469.3	19151.2
12562.7	10374	9762.32	12421.5	12844.7	13833.1	20422.1	15903.7	20354.9	16209.4	15197.8	15715.4	11832.8	9927.07	5480.47	7762.38	11621.2	10609.5	6139.31	10138.9	11456.4	14868.2	15456.6	19786.8	17386.3	18633.5	18327.7	27836.3	19709.2	23293.6	18845.2	18139.2	15597.7	22163.7	22281.6	19433.6	19928	19833.7
15503.8	10185.9	14750.6	13409.2	15691.7	13385.7	18845.3	13527.2	15917	15479.9	12115.2	11079.9	18892.6	16727.3	16633.4	15739	16586.1	19504.3	20375.2	12773.9	11738.8	10303.6	13456.7	18868.9	25929.7	23787.8	21552	28425.9	18176.1	20045.7	18845.1	19833.6	20869.5	18304	19221.9	18115.7	19998.5	17150.8
14044.6	13621.1	10915.3	16986.3	13574.3	14491.9	14938.9	17409.8	15621.4	14609.3	15574.2	19033.6	20540.1	35722.6	40361.5	66225.9	72187	51666.2	36287.6	30543.7	20375	10962.4	13950.8	18304	16868.7	21363.6	18045	19551.2	16374.4	15409.6	19810.4	16515.6	21810.6	23293.5	19245.3	22116.7	18374.7	17480.4
17128.2	17316	13009.4	10256.5	11315.2	11409.2	9668.35	10491.6	14572.6	10209.4	16327.3	16162.5	19834.2	20633.9	26165.1	40904.9	110467	47145	42363.8	27930.5	18751.6	12609.2	10679.9	13386	20916.3	18704.2	18068.8	16256.6	15675.2	17174.9	17433.2	15762.6	20304.7	21669.5	21952.1	26988.9	24329.3	20611.5
11550.6	12444.6	9527.15	8256.55	8703.63	11880.1	7386.15	7409.7	7661.69	10868.4	8068.33	13385.8	13668.2	14821.2	17856.7	25953.6	22563.7	22752.2	21928.5	17080.5	11668.1	13785.9	13691.8	19033.6	21081.3	26000.4	19221.8	18986.6	14626.4	14915.4	15997.9	18821.8	25788.7	26353.2	18892.6	19316.1	18822	17174.5
10044.7	4516.03	7291.97	9338.79	9762.39	10138.8	10868.2	9880.12	10269.8	8021.24	13809.8	13385.8	21952	23340.7	23905.4	16892.1	8868.31	6727.31	6868.37	13315.4	13197.7	17268.5	28731.8	24470.1	26000.8	24188.3	18068.6	15456.6	16266.8	16939	16468.6	19622.1	20139.8	19010.1	15903.7	19645.4	17527.6	18469.5
7009.57	6021.44	6680.43	7974.29	9433.04	11362.3	14939.5	10115.2	13819.4	13950.5	18092.5	14774.1	14538.7	16656.7	17245.3	8562.5	10303.6	14703.6	18069.4	11997.8	13950.4	19410.4	16280.2	16092	18257	18515.7	14327.3	16515.6	15110.3	16703.9	15480.2	17715.8	16562.8	18657.1	17127.4	20327.9	22540.3	21081
10844.8	12750.5	11338.8	11032.8	10680	12891.7	9080	11550.3	10619.5	11221.2	15056.3	18139.3	15032.9	18727.6	13103.6	13597.6	13762.4	13174.1	14939	14327.1	20163.3	15103.6	12774.1	11174	12444.8	11033.1	14068.1	11409.3	15003.1	13221.1	15692	21646.3	18351.2	16021.2	15903.7	18774.7	13338.8	12703.4
6962.55	7339.27	10891.6	11432.9	11362.3	8515.34	10774.1	9033.05	9463.21	15457.2	12986	13291.9	17762.8	16703.7	11056.3	16492	16515.5	9244.82	11809.4	10091.7	11527.2	16609.8	15910.5	2422.34	1434.35	4845.31	4727.66	11904.2	14142.1	18139.5	15221.3	16092	17056.8	17056.8	16209.6	18139.2	16986.1	18492.6
208
63197.5	63888.6	67001.6	65640.3	83165.1	66333.2	69098.1	74769.6	83803.9	73041	89738.5	61376.1	83994.3	55407.2	75719	62416.1	118133	141336	143463	91956.4	67231.1	73111	82800.6	53332.8	50060.7	87593	63358.8	85724.5	78348.9	72834.1	66816.5	61813.8	68778.4	60707.1	51489.1	66954.3	67163	83582.1
54947	58358.5	58264	77122.4	73133.2	88975.6	72444.2	74863.6	74132.7	70481	81388.2	83972	67808.3	58796.8	76040	101988	90685.1	84339.5	87869.6	85885.7	72119.8	81276.3	112167	93797.6	74887.9	74517.2	82102.6	82494.8	77188.9	82996.5	78599.5	75762.7	72534.2	83652.1	71335.2	61723.6	58749.6	50867.3
46557.8	59073.1	94005.8	96060.7	89882.7	65779.2	77730.2	77537.6	73709	113026	105450	105912	69974.1	70159.3	59071.1	61283.6	72974	88192.5	104205	115447	84916.4	105519	81089.1	102150	90982.3	84455.5	85126.7	87453.9	77161.4	97445.9	97004.1	79727.4	78021.5	81805.2	57619.4	66216.2	60017.6	74171.7
54669.9	62966.3	65780.3	58932.2	61767.6	60591.7	75905.8	75417.1	55109.9	51050.9	79430.5	86601.7	100469	131639	91446.2	74263.2	77813.9	83417.4	104859	100628	96634.8	91052.6	89554.8	75601.1	82080.3	78230.3	88352.7	103145	96406.8	76222	71358.1	78505.5	69905.4	87808	78805.7	69190.6	75139.1	70207
60801.2	54854.7	61468	56766.3	71841.5	103873	74078.8	81994.6	73846	68294.3	72442.7	81712.3	96474.6	96938.1	67855	73089.6	83949.9	120016	103676	104503	89346.8	109765	99270.3	88585.4	62759.2	80442.1	79105.8	64672.9	63855.2	82471.6	72810.9	75462	75601.2	77355.3	60963	80190.2	70158.3	93253
35960.7	48240.6	51281.5	78298.5	88929.3	99242.4	61169	86395.1	79823.9	91053.7	106098	106976	71726.5	49668.6	75787.1	83255.8	91977.7	85309.9	99406.8	117180	114059	89968.4	72150.1	75554.9	69951.9	80305	87292.3	82656.2	106849	122881	104483	99797.1	101898	114247	117223	93130.2	78528.6	89372.4
57159	137683	153262	80397.1	74377.8	83075.5	89598.7	88885.6	82301.9	70920.2	80557.7	99521.1	74793.2	79245.5	81833.7	69374.8	71495.4	83371.2	60547.5	66401.1	72049.6	80996.6	69282.3	92277	84548.2	94099.6	88814.5	98296.6	80665.7	96288.8	80442.8	82172.7	101622	127195	102267	124241	80074.4	79773.9
196524	226126	83313	62343.8	79314.8	82013.7	101071	120246	121383	135163	124541	152930	96372.4	125280	110460	61493.4	66863.6	57321.9	106932	64050.4	76801.3	91908.1	87753.2	80490.2	128491	96160.6	79474.9	92190	120318	77398.4	98274.5	87386.3	137242	128472	112310	87755.3	65295.2	85823.3
84936.6	59672.9	68986.4	60526.5	73709.9	72096.9	166652	217166	253768	204781	113436	88398	71196.7	91571.3	107181	66172.7	86604.8	98826.7	60271.7	73756	62067.1	78990.4	118452	109629	93821.9	97028.6	93433.4	123318	86360.9	115652	105566	99937.9	92231.2	121838	111176	100698	99450.8	107298
71593.3	57296.6	76224.7	59531.8	93891.5	85839.5	97835.1	87251.2	81537.3	80997	77514.4	53886.5	77540.7	58148.8	85129.5	80375.2	72511.5	82404	75718.3	65732.4	62413.4	55269.9	79568	95003.4	137543	128859	106235	119576	115738	112816	96450.1	100377	99963.2	89048.3	97535.7	89045.4	96730.3	91100.6
67440.7	69929.8	71795.5	99057.6	88426.5	83117.9	79081.4	85724.3	77715	84456	97975.4	117155	102680	111776	100768	133338	105843	109767	106559	123802	88330.7	62621.4	67857.6	85770	84991.1	121633	89576	104712	89106.4	86278.4	118781	99104.8	102404	105796	73340.9	97281	91815.2	90615.9
64858.7	78928.6	84664.7	72027.4	69329.7	77652.8	55268.2	63589.1	80169.9	49138.3	89996	83901.6	93866.9	86693.9	83487.2	81112	174009	105017	123618	99660	86862	88585.1	68476.9	66492.6	94536.9	88470.3	99727.3	92645.2	83145.7	100543	117499	93614	117016	106177	112335	135072	105797	105709
73757.2	72811.5	61122.1	63014	52111	60109.9	52065.1	66817.9	53793.1	61238.6	46074.7	89080.8	64696	81090	72302.8	110161	92253.1	98549.9	84918.5	79960.2	57965.6	87229.1	68799.3	93384.8	109540	134261	108248	103444	99469.5	93590.7	103282	99589.7	125842	141054	100627	119397	110321	115143
66817.6	29143.7	60140.8	59580.5	56813	64235.2	61237.9	75694.2	72286.8	72557.3	63266.2	74885.5	112907	125026	119948	86141.1	75603.6	57757.5	43010.6	85340	86369.7	91399.4	127663	112378	132024	146717	123111	115447	101496	105981	81756.6	90521.3	101736	100741	99519.5	101114	95068.9	113393
48217.5	46420.5	49806.9	60823.3	58241.6	60431	59832	57391.7	85333	87851.2	111243	87616.8	89300.8	95193.6	105004	89242.5	165386	180598	195510	100650	103351	129068	99058.7	85771.1	99982.4	96913.1	81088.2	84917	81431.5	87041.6	83671.9	92230	84274.5	90569.8	83002.9	98089.1	101020	108751
60686.8	55247.9	65732.3	78228.8	75347.2	78990.8	60546.2	73735.8	82437	81873.3	89230.9	113783	109627	125396	84849.4	89230.7	70275.5	138330	142165	144981	156545	132253	105959	115518	77999.4	88583.6	69376.2	68983.9	65778.5	79359	88773.2	108844	86462.6	80904.2	75000.8	99498.1	87339.9	79453
53380.1	46212	65779.9	61952.5	68132	55638.4	69444.1	78551.4	72893.8	87881.5	91089	87229	112835	117942	90041.5	92785.8	85356.8	64350.6	84019.4	105020	138464	149702	86632.7	42411.3	36630.8	78185.6	53748.1	63476.4	68703.6	92830.3	78394.3	95114	92626.6	86763.3	86207.9	93591.6	91837.1	118565
207
26771.1	27328.8	31301	28257.6	38433	29767.8	31277.4	32439.1	37739.5	32555.2	41058.6	30719.8	37434.1	27561.2	31231.5	28653	51076.6	63002.5	62677.5	35691.7	24076.9	31858.4	36296.3	21173.8	22265.3	37783	28931.6	36504.6	37420.8	33507.7	28373.9	28977.9	32648.6	25772.5	23008.4	28908.2	32253.6	37504.9
26562.9	26817.8	24587.8	34948.3	37137.9	37550.2	30557.8	33206.1	35377.1	33135.9	39502.3	36783.4	29372.8	26747.9	32021.3	44428.6	40362.4	35714.7	37434.5	34506.7	27444.9	35552.7	45195.9	39456.3	38317.6	31486.9	37457.4	37968.3	35482.4	34553.1	32485.9	34297.9	33554.7	35181.1	29744.4	27026.9	26144	22242.1
21870.4	26632.1	40733.4	44312.4	36900.1	30069.6	35227.4	37388	32800.9	48008.4	50122.9	51610.1	34785.4	32253.3	29883.6	28327.5	29442.8	40826.8	46869.5	48844.3	37968.8	42639	39873.4	45055.8	43268.4	38107.8	39479.4	39757.8	35057.8	39362.7	42731.8	35947.1	34204.5	38062.2	27235.7	29000.8	27422.6	34367.3
23659.4	29535.3	27700.8	27909.2	27746.7	27119.6	33021.1	31788.7	27623.9	28467.1	34205.3	36597.8	47008.9	54306.8	43150.6	32718.1	34738.9	38503.1	50332.1	42988.2	40082.5	40013.3	37783	35784.9	37969	37597.1	40919.5	43498.9	42440.2	34297.6	34506.6	35715.4	32137.4	39271	35901	29140.7	34019	31347.4
24216.3	23519.5	27351.9	27630.7	33531	44477.3	32531.9	33136.7	31926.1	27723.5	32323.3	35622.7	43777.5	43289.6	30604.5	36087.4	37899.1	52447.2	44776.7	45753	38038.6	47217.3	45079.3	38503.3	28536.6	34971.5	38014.9	28072.1	30438.1	38479.7	31184.7	34669.2	32857.4	38549.9	25075.6	34832.8	32137.2	42153.3
17574.1	19246.3	22009.8	35041.1	37852.3	44242.1	26725.2	40269.5	37076.3	41291.4	47334.6	45660	35296.9	21034.1	32485.6	37271.8	39549.4	40315.2	43034.1	48356	48402.9	41732.8	33461.2	33252.3	32462.2	36110	36691	35343.1	47061.4	54166.7	46635.9	40385.1	45219.1	50448.4	49680.7	38642.5	36179.4	37457.7
27468.4	54100.3	66723.2	37016.4	32020.9	36598.7	37526.9	40315.6	34154.9	31997.9	36504.8	42034.9	33043.3	32741.3	36156.4	34437.4	30650.2	35598.7	28629.7	28815.4	35389.7	34948.2	29605.2	39548.8	38433.5	46311.2	37620.1	45753.2	35907.4	38758.7	35993.9	35064.4	44056.6	54305.9	44591	56676.9	36109.7	33205.8
83445.2	90983.4	36947.7	28072	38502.8	47874.6	45451.8	51307.6	53276.3	58536.8	50145.4	73576.9	37133.5	51144.8	45776.8	27746.7	27305.5	27561.1	45684.3	27863.3	34460.5	41803	39246.4	34228.7	57676.9	43058.7	33647.4	40386.3	48311.6	33856.2	46474.5	40942.8	60862.2	48727.7	59324.6	40245.8	25377.5	36528.8
33625.2	26074.6	30673.4	25354.5	34832	34391.5	72445.3	90567.6	103229	87002.5	48937.5	35250.3	30162.5	40920.1	43895	27050.2	34995.1	41709	26074.9	33066.4	30626.9	35064.5	52634.5	50192.5	41244.9	40361.6	40199.2	57981.5	37155.3	47681.9	42266.9	43173.8	41128.6	50819	46915.6	45846	45171.7	49891.2
30836.4	26678.2	35855.1	28373.9	39805.3	38363.9	41639.7	38317.9	35774.5	38642.1	33787	25168.4	39456.1	26190.5	38944.5	35065.2	32880.8	34367.3	39502.9	28072	29697.9	28885.3	33786.8	40688.2	58003	56468.4	46543	49680.5	48495.5	51099.3	41012.7	44731.5	48961.7	40408.4	44498.4	42128.2	43034.1	43219.9
29535.5	31510.1	31974.7	45218.2	42198.1	36737.2	33856.2	40896.8	33942.7	41221.8	45381.5	52517.1	42406.3	50355	42267.2	55957.3	47147.3	48681.5	44846.5	52748.8	38108	25377.7	31975.2	40130.3	35134.6	55747.3	38944.4	47705	39678.5	42128.3	48986.1	39409.2	47960.8	47124.5	33577.8	44358.7	41988.4	40455.1
29280	33252.9	37225.5	31812.3	32183.9	31882	25540.2	28745.6	34102	24913.1	44895.2	39711.6	44335.9	36528.5	37015.8	34669.6	71724.8	47427.5	55400.2	43266.7	41967.6	37341.2	28490.3	28606.2	43940.5	38386.6	44823.6	44498.6	37926.1	42919.2	53190.8	44917.2	53120.7	47961.7	44870.2	60791.5	46102	46593.2
30488.3	31184.7	28513.1	28490.1	23705.3	24448.4	25098.7	28466.6	22129.3	28235	20732.5	42175.9	30697.2	34158.2	31463.1	44568.5	39873.8	45218.3	39339.1	35134.2	25586.5	40176.9	31974.6	40618	42708.9	62047.9	45637.5	43987.8	45468.4	43058	43360	44056.2	49542.2	60490.6	43011	49936.8	47449.8	50634.2
29954	17016.9	26795.4	28211.5	27723.6	29140.7	26771.4	33600.7	30146.2	32090.5	28629.6	32880.7	47147.4	51308.8	51703.4	37318	34810.8	27305.4	22149.4	40875.4	39153.8	39548.4	56585	48425.8	59793.1	65303.3	53098	51331.3	42413.4	50564.3	37434.2	39734.4	47426.9	44126.3	44242.6	46869.4	39851.3	49222.2
22474.3	21034.4	22544.1	26283.5	27235.8	26817.6	30790	26562.1	37314.7	34647.1	49913.4	35645.4	39502	44015.5	49079.7	40642.9	61676	75906.4	85060	45892.7	44474.8	54376.8	45079.4	36760.4	44823.6	43521.9	38804.8	37248.5	37633.7	39339.6	38294.1	43312.7	37806.1	41198.4	37480.8	44382	47496.2	46450.3
25517.1	25355.3	26748.3	35017.7	33600.7	35854.8	26631.9	33763.3	34607.4	38805.1	41152.3	48543.2	46403.7	55748	38340.8	41430.9	32625.6	55957.1	62582.9	61048.3	66815.5	56909.4	45218.2	47914.1	37318.8	38386.7	34901.8	31695.9	31420.2	35040.8	37922.6	45985.6	41802.6	32485.9	32439.6	42801.4	36249.2	34716.2
22845.9	20964.9	27630.9	27909.7	32300.1	24843.8	32485.5	36272.3	32694.8	38899.2	41386	36528.8	48588.3	53958.2	37457.8	42152	41686.5	27886.4	38503.1	46939.7	61722.2	64373.7	38203.5	20732.5	19595.6	36040.2	24030.7	31487	31872	37899.2	32136.8	41059.3	44267.8	36830.5	36876.3	41640	38247.2	48309.8
206
102136	115080	114608	109949	151510	115644	122990	132603	153531	120176	130030	150126	181999	124064	112975	111109	170816	170166	182054	108567	89878.9	103682	118659	86102.5	100893	137046	119555	136321	131656	113171	117480	113203	126924	97726.9	91784.4	125274	126546	131404
99499.9	114359	104374	137264	126348	161822	132438	142884	135867	134051	152853	152060	102859	103465	115551	161602	149541	140907	142071	130766	95608.1	104095	129819	131887	113570	130443	134467	150127	133125	131657	138543	139335	144282	135911	127846	116865	127215	91554.4
93034.5	109556	140506	153780	144329	126581	139458	157498	142909	186937	169902	187402	151309	129806	117664	123559	148480	161087	157519	167249	149015	173143	138913	172929	151624	170628	160447	153717	152442	150279	166782	150686	143233	157850	110614	128326	106076	137383
102641	114577	113678	112644	130441	108747	140526	154858	123520	100355	123809	139113	181755	192189	163060	138474	156102	158547	174605	159383	159186	164364	164935	153413	146500	138294	132345	165903	171146	153895	125564	149858	136524	153193	166115	124493	147769	131202
100880	99942.5	113062	116273	130782	143488	137044	131109	97108	75228.4	89316.9	137311	181142	194994	146755	162168	147242	173330	151744	170607	145990	173083	166604	163763	128165	154807	166059	137266	121931	145253	146852	152163	126033	182766	116344	155400	129202	149062
74477.4	81949.8	88121.1	138235	148044	172095	116708	177637	156873	161524	182696	196763	146378	113281	147847	168567	166780	156796	169099	156500	172424	146999	146434	138004	132933	153017	154655	144808	180463	174090	156337	147604	170932	188645	183612	161973	129565	139061
108074	124748	167156	137069	124511	151045	153505	144285	119445	123194	122143	136787	112664	116473	147439	145192	125882	142079	105155	113596	147366	137349	139933	162697	152339	172303	159119	171270	159174	177120	145977	146618	159085	197439	146867	187549	146492	128068
158097	197729	115787	118542	142493	156851	171027	179061	155080	166698	139056	152412	99595.5	118180	117144	101680	113745	102518	127338	115416	140445	159121	162442	148294	220092	161411	136855	154620	215886	128314	173871	146893	190980	167462	169529	145460	101424	118714
104678	104891	110280	104239	131442	141232	222427	217211	251212	197860	154607	128104	124267	119340	107842	86410.3	96588.6	102652	85887.8	127889	137582	167531	176465	182055	154022	160258	138471	188282	134753	176852	147660	147602	145557	159458	144405	155649	158440	149788
100110	97985	141806	104776	151526	137988	173553	135851	133139	154013	145707	131795	152842	99078.8	120764	106040	102776	130955	148237	132241	116425	104502	137613	149363	181670	178944	169636	181648	168743	173609	146469	155266	178028	145083	172665	159481	169834	166599
108878	133766	119325	168175	147618	147652	145687	161404	135880	141244	164455	173249	148141	157635	139030	186888	158349	176722	156691	172696	119548	85788.7	130703	174193	141429	210782	159915	186913	167431	159051	172738	150418	182166	173036	132210	180124	181681	159600
108887	114039	135861	122584	143855	127017	114309	118283	142187	123847	218823	179050	141379	123915	134507	134449	243457	157980	198799	155099	143085	89073.3	90245.4	117369	190189	161799	181156	176739	161437	177161	232920	170609	177370	148011	160749	209527	176114	165832
105227	115602	113881	116109	110576	114571	108173	105627	89840.6	108763	92230.1	164849	136651	147214	136261	166221	144657	168724	153212	154186	124167	152272	132062	179590	181592	221513	173564	180678	180094	174815	176758	173415	179770	204332	160247	156888	132075	166177
109985	84184.1	99071.1	107462	115833	129488	104438	139845	119567	114065	119707	125656	153647	169714	166994	153216	102794	92197.9	134511	168503	160944	169447	185143	187907	215112	198514	151778	175585	180675	196970	173071	160314	169374	164696	147204	163077	163578	181117
86402.9	73271.9	88924.9	92970.5	120098	106573	107551	116063	142454	126878	165204	147195	145918	143320	180820	144075	152447	193743	214587	144962	147676	219220	178270	151416	191905	179273	149683	168806	171310	171323	171834	187239	151730	173737	156755	191224	182774	183925
102955	87876.1	97249.9	120866	130826	143362	131704	143431	152853	154480	154597	173075	162453	195535	154995	173578	127382	156667	184279	182095	193694	186353	144456	165935	174959	156864	164214	133773	120747	140402	157378	192839	186397	148094	157835	189331	147814	147297
89085.9	79183.2	106687	108979	139791	122938	146248	145802	127530	145293	158306	130354	168851	182254	152175	178384	164091	116053	132240	153370	200295	209708	145477	122727	86756.2	100703	93933.1	135216	142092	153909	115922	166702	160939	166586	162303	174442	150059	185394

## Sheet: Duff Brown 2
Duff Brown 2		WC1 Correction factor: 1.02912
238
5.46986e+06	3.1375e+06	3.15508e+06	2.43397e+06	3.21451e+06	3.96149e+06	4.20555e+06	4.45024e+06	5.48787e+06	4.16293e+06	4.71701e+06	6.27778e+06	5.79358e+06	5.10477e+06	5.0259e+06	6.05163e+06	5.27988e+06	4.58071e+06	3.80705e+06	3.09044e+06	2.5107e+06	2.38039e+06	2.0904e+06	2.33802e+06	2.73996e+06	4.05999e+06	2.25022e+06	3.73702e+06	6.4468e+06	7.76792e+06	6.80563e+06	9.19639e+06	6.96507e+06	7.25072e+06	7.25783e+06	6.88267e+06	5.29377e+06	5.63477e+06	6.96938e+06
4.58038e+06	3.81926e+06	2.7099e+06	3.05919e+06	3.177e+06	3.35893e+06	4.70677e+06	4.78776e+06	3.05761e+06	4.49918e+06	6.50484e+06	6.99161e+06	6.48255e+06	6.81437e+06	7.14994e+06	6.10873e+06	3.68672e+06	4.70161e+06	3.3689e+06	3.54058e+06	3.6168e+06	3.73715e+06	2.99433e+06	4.04363e+06	5.12017e+06	1.77666e+06	1.67102e+06	4.9177e+06	7.14234e+06	7.12551e+06	9.38993e+06	7.72889e+06	6.73086e+06	8.36427e+06	7.08813e+06	7.39982e+06	5.60767e+06	5.73999e+06	6.88593e+06
5.06904e+06	5.26066e+06	5.43867e+06	5.10656e+06	4.20261e+06	5.1468e+06	3.32319e+06	4.74848e+06	6.12318e+06	6.83548e+06	5.53451e+06	7.39604e+06	6.17142e+06	7.69041e+06	6.70379e+06	6.48585e+06	4.91278e+06	5.04264e+06	4.46755e+06	3.49583e+06	2.5391e+06	3.62884e+06	4.02804e+06	5.58901e+06	6.24891e+06	5.11686e+06	5.16115e+06	5.75066e+06	7.25075e+06	6.18326e+06	6.2972e+06	6.79374e+06	7.65457e+06	6.95962e+06	6.3281e+06	5.2836e+06	6.50641e+06	6.29828e+06	6.8089e+06
4.97062e+06	5.11747e+06	4.87225e+06	6.20449e+06	5.94857e+06	5.34339e+06	4.38963e+06	4.63097e+06	6.28233e+06	4.95174e+06	4.11967e+06	4.53775e+06	6.45118e+06	5.03239e+06	4.68126e+06	3.05522e+06	5.74226e+06	4.70169e+06	5.19287e+06	3.70244e+06	3.67271e+06	3.39286e+06	4.48e+06	4.09646e+06	5.77729e+06	6.95477e+06	5.86591e+06	3.09075e+06	2.69353e+06	3.14065e+06	2.60915e+06	3.22611e+06	4.32901e+06	7.24043e+06	8.58707e+06	1.02275e+07	6.55359e+06	6.2276e+06	6.15462e+06
5.59256e+06	4.4372e+06	5.52982e+06	5.08503e+06	7.29085e+06	5.23088e+06	5.66665e+06	4.81532e+06	7.36676e+06	4.89709e+06	6.33404e+06	5.01588e+06	5.92802e+06	3.51754e+06	2.33621e+06	2.3758e+06	4.3266e+06	4.55986e+06	4.80927e+06	3.78226e+06	4.19258e+06	4.83972e+06	6.11018e+06	5.38517e+06	3.33291e+06	5.44619e+06	7.18567e+06	5.28053e+06	4.94179e+06	5.67431e+06	3.43082e+06	3.84571e+06	4.71285e+06	7.61448e+06	8.35122e+06	7.6221e+06	7.21606e+06	7.09464e+06	7.05612e+06
3.67017e+06	3.62366e+06	3.50079e+06	4.53041e+06	5.68081e+06	6.21588e+06	5.64755e+06	4.86811e+06	3.78846e+06	4.8148e+06	3.64277e+06	3.87283e+06	3.3095e+06	3.11663e+06	4.51737e+06	9.28748e+06	7.86979e+06	5.25425e+06	5.25118e+06	4.78966e+06	6.65239e+06	5.49156e+06	5.06059e+06	4.75849e+06	3.69495e+06	5.69222e+06	7.76301e+06	6.81976e+06	9.4317e+06	5.97401e+06	5.45555e+06	5.61264e+06	6.06029e+06	6.60835e+06	8.08612e+06	6.7195e+06	7.82592e+06	8.19294e+06	7.32396e+06
3.63827e+06	3.91916e+06	4.97013e+06	6.8382e+06	5.973e+06	5.78097e+06	5.30059e+06	5.55403e+06	4.60169e+06	4.45311e+06	3.44817e+06	4.74026e+06	6.34524e+06	3.70834e+06	3.89172e+06	5.53172e+06	4.901e+06	5.1806e+06	6.03207e+06	5.04874e+06	6.52921e+06	5.79899e+06	8.81637e+06	8.6911e+06	9.66588e+06	9.9575e+06	8.11214e+06	7.59825e+06	9.34763e+06	6.29284e+06	6.65872e+06	5.24388e+06	6.3259e+06	7.75293e+06	8.45155e+06	6.99273e+06	1.02004e+07	7.90348e+06	7.68496e+06
5.98635e+06	4.17559e+06	2.63911e+06	3.04784e+06	4.76878e+06	4.18668e+06	5.2107e+06	5.08455e+06	5.83043e+06	4.76105e+06	7.00031e+06	6.50538e+06	5.38386e+06	4.51214e+06	4.0309e+06	4.39464e+06	5.20209e+06	6.90973e+06	5.13544e+06	5.41084e+06	4.142e+06	5.02604e+06	6.10961e+06	1.02731e+07	8.47379e+06	1.00508e+07	9.15298e+06	9.41762e+06	7.38357e+06	7.13741e+06	6.46742e+06	7.51635e+06	5.66679e+06	5.65915e+06	5.46559e+06	7.30982e+06	8.45476e+06	9.08967e+06	6.12335e+06
6.1432e+06	5.15783e+06	4.55779e+06	4.77923e+06	5.12858e+06	4.72952e+06	6.50957e+06	4.86092e+06	4.03961e+06	5.06752e+06	4.93642e+06	7.03172e+06	4.81869e+06	4.76896e+06	4.03242e+06	6.64916e+06	4.30274e+06	3.93482e+06	2.76056e+06	2.71939e+06	2.66529e+06	3.32742e+06	5.33584e+06	7.13204e+06	6.89632e+06	8.81423e+06	7.65303e+06	7.43921e+06	6.03537e+06	5.87975e+06	5.98548e+06	4.42814e+06	3.86161e+06	5.72585e+06	6.10618e+06	7.48386e+06	1.07181e+07	5.58647e+06	5.14224e+06
4.28619e+06	4.07542e+06	4.34518e+06	3.24977e+06	4.10243e+06	3.91262e+06	7.87365e+06	5.94591e+06	6.80408e+06	5.98953e+06	9.04293e+06	7.93971e+06	6.00392e+06	5.49865e+06	4.19884e+06	6.19981e+06	5.85974e+06	5.5763e+06	3.11397e+06	4.8391e+06	4.86867e+06	4.80259e+06	7.89695e+06	9.43005e+06	7.49524e+06	8.16311e+06	5.0447e+06	6.51077e+06	7.85414e+06	8.56101e+06	7.47082e+06	9.80139e+06	9.8215e+06	1.11133e+07	9.64799e+06	1.03929e+07	8.87486e+06	7.58793e+06	8.64345e+06
2.64952e+06	2.52332e+06	1.27877e+06	2.11998e+06	1.3587e+06	2.28871e+06	2.84721e+06	2.54834e+06	4.04783e+06	6.9905e+06	7.20301e+06	8.25414e+06	9.52923e+06	1.0189e+07	1.05501e+07	8.33986e+06	7.51639e+06	5.0346e+06	5.76466e+06	5.10799e+06	6.43977e+06	6.00026e+06	6.60836e+06	5.22892e+06	7.64212e+06	6.48962e+06	9.30645e+06	7.83238e+06	9.71416e+06	9.22623e+06	9.75421e+06	1.06249e+07	9.2777e+06	1.07979e+07	9.76181e+06	7.41935e+06	8.86067e+06	6.21622e+06	8.60986e+06
888790	1.30199e+06	2.91384e+06	3.96519e+06	6.49941e+06	4.72858e+06	6.1145e+06	4.33917e+06	5.65472e+06	7.26481e+06	7.44917e+06	8.95407e+06	8.47316e+06	8.2054e+06	6.93851e+06	8.22063e+06	7.0529e+06	8.71662e+06	7.02465e+06	7.98205e+06	6.68371e+06	7.29085e+06	6.46647e+06	6.51079e+06	5.98764e+06	7.47681e+06	8.19996e+06	8.88739e+06	8.77513e+06	8.05472e+06	7.9159e+06	8.14903e+06	8.60546e+06	9.89412e+06	8.42276e+06	6.9439e+06	7.65785e+06	8.02695e+06	9.87618e+06
1.20431e+06	3.55886e+06	4.89879e+06	5.89114e+06	4.35903e+06	7.04691e+06	5.35418e+06	7.08446e+06	4.18493e+06	7.71423e+06	8.80715e+06	6.76179e+06	5.29044e+06	7.0682e+06	6.55455e+06	6.96453e+06	8.92914e+06	6.13404e+06	9.12914e+06	7.08597e+06	5.93451e+06	3.64943e+06	3.22148e+06	3.17956e+06	7.41931e+06	8.47977e+06	9.74066e+06	7.2497e+06	5.83358e+06	4.88808e+06	7.86981e+06	8.00048e+06	8.33058e+06	8.30571e+06	9.88816e+06	7.16778e+06	6.31615e+06	6.57095e+06	5.89006e+06
3.25296e+06	2.58488e+06	3.40793e+06	3.34818e+06	2.28886e+06	1.61381e+06	1.79798e+06	1.63918e+06	3.15502e+06	4.82801e+06	8.23903e+06	6.7276e+06	9.19476e+06	5.98817e+06	7.08704e+06	5.54583e+06	5.77351e+06	6.36353e+06	7.60569e+06	4.85447e+06	4.04327e+06	3.61412e+06	4.5923e+06	7.80967e+06	8.90088e+06	8.82505e+06	7.75653e+06	9.33297e+06	5.73743e+06	4.90568e+06	4523091	7.20632e+06	7.40418e+06	9.57156e+06	7.76683e+06	7.65946e+06	8.14583e+06	7.37707e+06	5.89459e+06
3.82407e+06	3.29107e+06	4.66986e+06	5.02291e+06	6.64523e+06	5.17715e+06	4.32279e+06	3.89807e+06	3.62905e+06	3.51283e+06	5.15288e+06	1.03213e+07	7.83456e+06	6.3227e+06	4.85581e+06	4.21752e+06	3.73282e+06	6.95465e+06	7.49688e+06	6.47391e+06	6.28904e+06	7.32502e+06	5.24653e+06	7.26865e+06	8.78873e+06	8.0026e+06	8.79088e+06	8.14736e+06	8.9715e+06	7.56624e+06	1.11252e+07	9.50652e+06	1.026e+07	8.90638e+06	1.01104e+07	1.15796e+07	1.06552e+07	8.24169e+06	7.22041e+06
2.50171e+06	3.534e+06	4.58765e+06	7.67632e+06	7.39711e+06	8.0422e+06	8.18046e+06	7.35753e+06	5.84021e+06	4.68645e+06	6.60628e+06	9.17261e+06	6.24298e+06	5.17086e+06	6.38502e+06	5.64613e+06	9.63822e+06	7.81448e+06	9.62193e+06	8.6591e+06	1.05479e+07	9.09447e+06	1.01403e+07	6.6772e+06	3.57202e+06	2.59738e+06	3.72364e+06	6.61908e+06	7.87414e+06	9.23706e+06	1.08737e+07	9.78624e+06	9.1796e+06	1.02405e+07	1.04753e+07	1.02758e+07	8.93783e+06	1.05864e+07	8.62553e+06
235
40926.1	22557.9	22722.7	17262.1	22764.2	29627.8	30225.4	31792	39625.9	29895.3	34183.1	48289.2	41214.2	40450.9	38388.8	39729	37358.9	33915.2	28720.5	24515.8	18560.3	16582	15737.4	18601.4	19961.5	28864.8	16644.1	28020.3	46472.7	54743.6	47813.9	68340.4	49462.6	52124.3	52145.1	49319.2	38451	39873.6	48947.8
33937.4	26514.9	19116.6	21857.4	23712.2	23980	34409.8	33874.5	22887.6	32616.9	43523.8	50411.4	48349.1	47916.3	49813.4	44699.3	27937.6	34018.1	25794	25711	26185.4	26495.4	22372.9	28576	37564.4	14295.4	12214.5	35895.9	49236	51753.7	69130.1	55466.7	49216.9	60685	49070.8	51339.9	40678.4	40121.1	49277.2
37337.6	38595.5	37544.3	34286.3	31214.5	37131.5	26061.8	35379.4	41502.5	47565.8	37152.1	51113.3	43337.8	56208.3	47380.2	46121.9	34780.9	36101	31049.7	26164.6	17324	27339.5	28782.4	42080.6	45276.7	36925.3	37606.4	41234.7	50865.5	45276.6	44493.9	49092	52206.7	51278.6	44059.5	40080.2	47173.9	43853.5	48926.6
35730.2	37832.3	35915	45235.6	39089.9	39729.5	30369.5	35502.6	44741.1	36905.6	30802.5	33791.5	43791.7	34760.4	34863.5	22619.8	42492.6	34121.4	39110.7	27690	27298.2	24475	31544.6	30225.4	41213.9	48679.6	41028.6	24351.3	20208.8	24206.7	18951.7	23547.2	31420.7	48783	60768.3	70055	49276.9	44349	44884.6
39503.5	33111.2	37894.6	37729.4	49855.3	36636.9	41440.9	34368.8	53053.4	33668	45689.3	33399.7	41378.9	26494.9	17159.1	17097.3	28349.4	31894.8	33667.7	27813.5	29709.7	34513.7	44059.8	41255.4	22846.6	38699.4	50350	38100.5	37420.1	40554	23815.3	29977.8	35997.2	53712.4	59962.6	55403.4	54208.1	51587.3	47339.9
27360.2	25505.6	26803.6	31689	39812	45484.2	38162	36945.8	26679.8	35646.7	26020.3	27277.9	23897.4	23052.8	32062.6	64460.5	55218.1	40801.3	37873.8	36636.7	47711.3	39894.6	35524.3	34905.5	26597.7	41543.8	54682.9	46472.8	62563.9	42616.8	35894	38430.7	46699.1	47689	57074.4	47029.2	56414.4	60190.3	53300.7
27030.7	29421.2	34823.1	46307.8	41440.6	41853.6	37255.3	41172.7	34039.7	32327.8	25072.2	31791.9	45339.4	26309.3	25484.5	39378.7	36595.4	36533.3	43482	35358.1	46761	40244.5	60686.4	60870.4	68464.9	72738.8	58374.9	55032.8	67824.3	44946.3	49999.8	37543.8	44431.3	53448	67660.2	50186	73624.8	58148.1	53670.4
41482.7	29297.7	18065.8	21465.7	33936.2	30719.9	37895.2	36100.5	42698.5	34245.1	50906.8	48411.1	37028.5	30987.9	29648.1	31255.9	35791.2	49401.6	32307.2	40863.3	30287	37090.4	41832.5	70903.9	62895	70448.8	64378.8	67082.4	51979.3	49978.8	43914.8	53815.2	41297.2	40306.7	37935.5	50783.2	60334.5	63204	44061.8
45565.1	34183.5	34389.6	34513.5	37317.1	32370.7	45173.7	34059.7	29174.2	37668.2	35399.5	50474.6	36574.8	36142	28638	45689.1	31688.5	29112.1	21383.3	19054.5	18086.3	23712	39298.1	50825.8	47218.3	62996.6	57468.3	48412.5	44224.5	43420.3	41110.7	32678.7	27483.8	43194	43300.4	51030.5	80501.2	37255.5	38182.9
33317.8	27318.7	30843.6	20992.3	29565.4	27607.7	57755.8	42884.7	50474.4	44183.9	62377	54517	43750.2	39853.2	29297.9	41586.1	42018.3	37873.7	22867.1	35399.8	36719.2	35977	53361.5	66835	51856	56909.3	34286.2	49174.3	53877	61984.3	53031.2	71827.5	65472.3	82398.4	64895.2	74056.9	65678.1	53526.4	64111.6
21300.9	20683.4	9598	14480.4	10133.4	15510.7	19013.6	17880.3	26804.5	47421.4	51112.9	59611.8	68549.7	69414	76306.8	60294.2	54310.8	34266.5	43194.3	36616.3	44245.1	41420.2	44534.1	37853.1	52743.1	47772	61345.5	56084.1	70692.2	66648.1	66071.9	76141.2	65720.5	74700.3	72468.2	51608.4	60376.5	43754.6	60148.3
5931.07	9330.26	18889.9	27751.8	45709.8	31008.9	44575.1	30781.9	40410	49834	54413.2	63927	61036.6	57755.1	48308.9	59241	49689.9	59737	49504.6	55218.8	47669.3	49999.3	46864.3	44967	43111.1	52392.4	56579.1	61035.5	60994.5	57446.6	55445.5	58808	61200.5	72943.1	61592.7	49133	55424.6	56496.8	72674.7
8629.61	25444	34451.6	41832.4	31544.7	48431.6	36823.1	50435.5	28267.7	55383	59797.9	47751.4	36925.8	51320.5	46019.8	49483.8	63533.5	44863.7	64276.6	52064.3	43935.5	25732.8	23238.2	22248.8	53403	58786.8	71209.8	45833	37874.1	35524	53547.2	56599.7	60334.6	61881.7	70465.6	49751.7	43172.6	44966.9	41811.7
22784.9	19219.6	26845.1	24763.3	15902.2	13141.2	13429.8	11657.9	22084.5	34059.6	57715.3	46823.4	63883.4	47153.1	51257.9	39172.3	39626	45422.1	54703.4	34224.7	28452.8	25814.1	32389.8	58088.6	61345.7	63573.5	54104.5	62995.8	42391.3	36451.4	30720.6	51195.9	49710.4	65763.2	56828.5	51670.7	56683.4	54764.5	41008.1
28700.5	26908.6	33544.1	35688.2	47049.7	36595.4	33380	28906	26205.9	25732.3	36018.7	72386.6	55136.3	46575.6	33833.1	30245.9	29524.6	47339.5	51258.2	46699.3	43482.1	49175.1	35832.6	51608.1	59942.5	57053.6	61633.7	58499	63327.7	53753.9	76914.2	69332.8	74903.3	63452.2	70656	85824.8	70301.2	60665.1	50866
20188.6	28122.9	33091.7	51979.6	52846.1	59942.2	55754.3	50989.3	41523.1	33235.1	44474.6	63573.5	42925.5	36554.1	41544	39873.6	66978.7	53877	66545	59653.2	73644.8	64811.9	72386.1	48886.3	26247.7	18436.5	27504.5	45754.6	55589.7	68155.2	80437.2	67103	63759	69661.6	73871.1	74016.1	62830.5	76739.7	60932.5
232
7540.64	4548.5	4118.1	5716.65	5204.27	4671.44	6905.26	5901.06	7561.21	7438.09	6495.3	6249.55	6085.53	6167.45	6311.08	7315.09	3769.86	5778.12	5040.38	5081.4	4466.59	4097.65	3913.3	3134.54	3175.74	8852.36	5655.25	5511.74	4282.18	5962.47	5552.64	6269.87	7315.34	10102.6	9549.27	10287	5224.84	5327.45	8545.02
5593.66	6372.55	5511.61	5552.76	5081.27	3954.32	7356.17	6597.91	5532.19	6536.51	5081.4	5040.44	5265.68	5388.8	6188.14	8196.65	5675.7	6105.98	5347.84	5327.33	4876.48	5388.8	3995.34	3790.31	7929.96	4302.69	3810.94	5409.31	6413.51	8237.49	5081.46	4917.44	5224.84	8401.45	9651.7	9118.81	7028.26	5368.29	5757.61
6003.49	6392.87	6843.79	6761.93	6229.16	7212.66	6249.42	5778.12	6802.83	6782.38	5696.02	5901.12	4712.46	6700.28	6167.51	6884.81	6474.98	8360.55	6536.44	5368.35	5675.7	5901.12	4671.56	6782.38	6536.63	5839.65	4384.48	4056.81	5040.44	3995.41	5122.42	8524.57	11967.9	7848.04	7909.51	7991.61	6843.79	8790.83	8135
7212.91	7684.09	7848.17	7991.68	6577.4	7089.72	6003.67	6085.53	9036.71	6208.53	6434.02	5040.56	7991.61	7253.87	7007.81	6393	8524.51	6700.4	6351.85	4425.63	4855.97	3544.43	4896.87	5532.13	6741.48	5183.88	2622.34	942.233	327.608	942.295	1433.92	2458.32	2786.42	3995.28	4015.67	3769.8	3708.39	4938.01	6003.55
8422.02	6618.42	9794.96	6392.81	8380.94	5778.19	7048.7	3626.35	7376.8	6372.55	9672.27	4405.06	6720.85	6270.12	7007.87	9323.79	7499.68	7007.81	6638.93	8298.9	8975.3	7868.55	7356.23	6454.46	6597.73	6126.55	4835.34	3155.11	6536.51	6290.45	2437.93	3237.09	5368.29	8893.38	9303.28	8257.94	9262.19	6638.93	6843.91
2683.68	4077.39	3708.39	4077.2	4343.71	4794.56	4712.4	6229.04	4097.77	4343.46	3851.77	5491.17	5634.74	6761.87	5798.7	4773.93	3585.51	2909.17	4405.18	5081.33	6290.63	8339.92	6310.95	6597.85	5142.86	6044.57	4568.95	5819.2	9139.19	6454.46	3851.84	5347.78	9569.78	10000.2	11352.9	9303.09	9098.48	8995.87	8175.96
3052.74	3790.37	5819.08	10430.6	9385.07	7745.74	4200.2	2642.91	2888.6	3913.18	3114.09	5716.65	7868.55	5060.89	5491.29	5696.15	4856.03	3831.45	4651.05	6843.91	7889.13	7294.82	6946.34	5286.31	5388.86	5696.33	6270.12	9467.3	11024.9	5429.76	5880.67	4692.01	9283.75	8750	10984.1	8401.51	8217.1	7479.11	8503.75
18550.3	6208.65	1351.94	1659.35	3462.45	3339.57	3216.45	2786.23	3626.41	4302.75	8462.98	9077.91	7233.36	4937.89	4815.07	5101.84	3626.41	3237.09	3544.31	4589.58	2950.25	3708.33	5306.88	7622.62	6761.87	7294.82	10491.8	11352.8	10061.7	9897.51	10697	8339.92	5040.44	6188.02	8319.47	7192.4	6700.34	8688.34	9426.09
8442.53	7970.92	5347.78	4630.54	4958.4	3196.13	3933.69	3913.37	1925.67	2294.42	2827.32	6454.53	5142.93	5142.8	3544.49	5388.8	4548.38	4220.65	2294.48	757.827	593.807	1638.9	3933.88	8934.34	9487.81	12787.7	8626.81	7089.66	7704.53	6597.91	5245.23	4425.56	3319.07	4261.73	3749.47	8012	10902.1	6782.26	9713.35
8196.53	6638.87	6618.3	2499.4	3032.11	4261.67	5655.12	4097.77	7007.87	7602.11	15288.5	13586.9	14079.2	7602.05	2622.4	6147.18	7376.74	7048.7	4917.38	4814.95	3421.62	3954.32	8217.04	11332.2	7274.07	7151.31	5388.68	7581.66	8647.38	10922.5	9405.76	12049.7	11373.4	14181.4	11680.9	16457.2	10676.5	8237.43	8893.32
1106.01	593.869	327.608	737.317	429.973	1085.68	1925.67	1372.51	1905.16	3647.04	10676.4	8504	6433.89	8708.79	12685.4	13259.1	9795.15	7048.95	10061.5	8544.89	6618.3	7397.07	7479.17	5142.74	6823.4	7643.13	9856.62	9549.21	13976.6	13136.2	13464.1	13566.5	12644.2	16785.3	15062.9	7807.15	10717.6	7315.4	11988.3
184.283	266.2	614.502	3688	7581.47	4958.46	7315.15	4241.1	3646.86	9692.72	10205	10656.1	11045.3	12193.3	12049.9	12972.1	8360.36	12357.3	10860.9	8647.26	7335.72	6085.65	5552.7	4589.52	4692.01	7848.1	8585.73	10389.4	10594.6	11229.9	8524.45	9364.74	11393.9	11394	9590.36	8831.79	10102.7	13443.6	12910.7
225.119	3196.13	8299.14	7397.25	4958.52	9016.44	7827.6	7458.78	3093.52	4200.2	10020.7	8216.86	9774.76	14099.8	11947.3	10348.4	13853.7	8811.46	12111.5	9405.64	7007.87	3708.39	1823.31	2192.12	5265.92	9446.78	12234.4	8462.85	4425.63	4978.97	6393.06	7868.43	8790.95	11475.9	10984.1	8790.95	7376.74	8135	7171.64
2970.64	1782.22	2007.71	1351.94	1044.72	593.807	593.869	450.483	1290.54	3380.6	9897.76	10225.5	8708.91	5204.21	5901.19	4917.31	5778.06	7294.76	4159.24	1515.96	1864.33	1618.45	1659.41	6536.51	13792.2	11988.4	11557.6	8134.88	3339.45	5224.9	5634.8	8811.34	8298.96	11742.5	10327.9	9405.7	10328	9692.66	7356.29
6024.06	5655.25	4159.3	2950.25	1700.31	1720.82	2212.63	2028.04	1823.18	1064.99	2335.38	5142.86	5060.89	5081.46	5347.78	2745.21	1700.37	2683.87	4466.52	6802.83	4548.56	6413.51	7684.02	9323.73	11455.3	10410.1	11209.5	10061.6	10881.5	7192.27	9979.86	11783.3	11352.7	8770.5	10225.7	13300	12910.7	11332.4	12398.3
1290.47	3319.13	8936.25	10635.5	11414.2	13710.1	11598.8	12603.2	6987.36	3810.76	3769.92	4528.11	2437.93	3380.66	4343.65	3564.82	7294.82	5716.65	11147.8	9036.71	8339.98	6802.95	9446.72	7560.96	10451	9713.17	8012	8852.36	9241.68	11414.3	12890	18179.4	12500.8	11086.4	12357.1	13853.6	25338.7	27735.1	13587.1
208
72778.3	48258.7	44300.4	43824.3	44424.6	49790.8	56836.1	51324.4	58824.9	47884.1	52919.5	68712.1	55012.2	55841.3	58681.4	60338.8	53229.7	52111.4	62065.1	177290	58432.9	56918.1	55987.7	78892.6	55344	89823.3	117724	97252.5	62577.7	63509.8	55841.8	69623.3	62368.8	72589.1	72259.7	79431.1	52318.2	61064.1	78290.9
39598.5	42871.6	39888.8	47222.7	39929.7	44239.7	71365.4	59593.1	43471.7	52215.3	53271.2	52691.3	44508.2	61437.8	56651.2	77047	47782	61747.1	44715.2	53603.1	49191	67057.3	64339.9	54349.4	91094.8	42396.2	36823.9	88363.7	79723.3	72030.9	58205.4	68608.5	55593.2	82211.7	90818.8	79848.9	66124.1	52774.2	65291.8
49915.4	48361.2	54037.9	57623.8	55510.2	62619.2	53458.4	54017.5	50287.6	75472.2	66577.2	72775.5	46745.4	65292	57540.5	60131	49479.3	75740.5	59468	61457.9	51510.6	111583	73977.9	63716.3	61604.2	57333.6	51738.7	74977.6	79244.6	61603.1	66083.9	67219.3	76322.3	68193.9	68991.7	89965.6	64296.8	64048.1	59240
49439	54805.1	59053.9	60733.6	55800.5	53644.7	46082	48194.9	59719.1	65312.4	47138.5	42166.9	62163.5	69977.2	81714.9	56401.2	75595.8	67405.9	75955.4	44010.4	56400.2	46849.3	65749.2	61975.6	78549.1	63260.2	61191.5	80647.9	69645.8	110658	134287	110620	70503.4	76346	80323.7	81738	44445.3	54039.4	59241.4
59157	51179	61622.9	54950.8	74497.9	57146.9	64443.9	45440.2	86341.1	54081.6	72858.7	50018.5	66349.9	49915.9	53188.7	55966.6	71863.7	73625.4	72589.1	77983.4	104325	77502.7	68546.4	67946.6	54619.9	62663	61249.5	90825	79765	99851.9	81777.8	88934.2	72153	85904.1	71821.6	83828.7	67447.3	67738	60814.8
29989.9	46125.7	41670.7	41008	53272.6	46620.8	49769.9	54970.4	39910	48630.2	54991.7	53003	41049.1	47159.4	55924.8	85861	68898.6	53271.4	65996.7	72465.3	99617.1	81838	74246.6	77381.2	46869.6	51904.3	53209.9	46579.3	82503.2	52774.9	49087.3	94119.7	80558.4	73313.9	87167.9	70121.3	74374.5	63365.3	76653.4
31729.8	35311.3	45336.9	75159.9	64732.1	69667.9	76241.7	52194.2	46227.1	57354.2	48050.7	59736.8	62329.6	43162.4	44197.7	58535.2	45460.7	39102.3	96533	125986	106572	81649.7	84885.8	71760	73771.7	87463.3	67347.3	66099.5	84494.1	54597.6	70660.4	57582.8	71429.9	87381.7	79310.4	68443.4	75824.9	70207	83744.5
76321.8	44985.8	53293.3	54579.4	58848.5	49127.5	50993.9	45729.8	52630.3	46019.5	64339.1	63157	60110.4	54763.1	54805.6	60981.5	184890	104222	114006	69810.3	45150.7	39102.2	58369.4	91204.6	77136	68795.6	87253.2	101255	73542.6	83745.8	98971	86650.6	53254.1	51324.1	76321.8	64317.7	58017	72741.1	82729
65148	66390.8	48962.4	48568.9	61830.5	60007.6	60152.5	43803.8	54411.8	82453.7	49315.7	68282.1	49935.6	61105.1	56566.6	113071	58348.2	74373.5	78584.3	92955	97856.2	56734.2	60095	92024	74374.5	93477	87002.2	70685.5	73648.8	87549.6	83766.1	86669.8	111803	93660.4	56154.1	59798.9	80720.2	64856.4	94767.5
69583.4	65229.7	70789.2	47389.1	97167.7	74081.8	79517	55820.7	66888	67656.8	108314	112960	83417.9	112340	103317	113315	97830.4	89864.7	49707.5	65293.6	76241.4	62244.9	80135.7	90966.3	71160.3	71531.3	61747.7	80075.8	82127.3	95450.5	70889.5	88100.9	87850.6	103683	86026.7	95298.4	71593.1	66161.8	96269.1
13966.8	70855.4	40697.1	68887	75429.9	89493.9	103486	95536.9	80700.2	74581.7	127839	88477.5	64338.9	90092.7	102919	115022	95547.3	67531.5	89726.6	78023.1	86794.7	85241.9	69231.5	52113.3	67427.3	59778.8	74932.3	73748.8	106256	98992	100675	111341	97478.8	105534	98101.1	65498.7	74146	62532.8	98618.6
31362.2	27280.6	70375.1	74071.5	118012	77695	103581	70849.2	72509.6	99988.9	130223	99001.6	97955.8	96817.1	120435	125418	97106.8	104618	76155	80821.6	63676.5	58203.6	57376.3	69769.6	69729.1	75057.4	65415.5	83620.4	78893	98536.9	83766.2	79058.5	83269.5	84020	78645.4	76736.4	93539.1	96232.9	107813
39041.5	66789.8	87358	103133	78057.6	132938	76967.1	137153	79914.3	86214.6	111820	73170.1	72678.4	133906	128011	110552	153076	101942	106749	111091	139504	117322	94326.5	56795.4	99644.9	70122.5	79161.5	77726.5	108955	72486.4	67779.5	62804	68380	81818.1	89012.8	65665.6	59197.8	73855.6	74040.9
59799.8	45959.7	35393.9	41234.8	70403.9	86595.1	110292	125425	78727.9	46289.1	79269.6	77875.6	86734.9	47367.7	72114.6	56836.4	83145.8	103143	83934.7	60653	100310	85509.6	73316.7	72652.9	89221.5	106488	86671.8	66764.5	116640	117571	55903.1	79081.4	61561.1	88108.3	81714.5	71263.3	69603.8	69251	70245.7
56609.3	50083.3	40635.5	46662	32517.3	54485.3	63184.4	29803.6	102909	99801.9	64651.1	109476	66079.4	62702.1	60710.8	82067.8	73525.6	52484.8	52359.9	54680.3	48257.7	56648.9	55551.4	123949	95527.6	74868.7	78933.3	78455.8	78395.8	70247.9	77556	75554.5	82769.5	83271.9	81387.6	93017.7	84305.3	80301.9	89346.1
50976.7	59220.6	61106.7	96026.5	106278	124693	99285.8	98809.3	80550.6	78602.7	76657.5	62765.5	47906	67923.3	71494.1	51883.5	83771.6	56317.7	73709.3	70307.8	80800.5	61997.5	94552	69896.6	67841.5	56628.4	68485.5	82899.9	85449.1	76550.7	100448	78872	78912.3	99951.1	97914.2	94328.2	86440.4	115390	99323.8
207
31445.9	20183.8	18471.8	17853.3	18245.1	21153	25009.6	20142.3	24246.4	19296.9	29160.4	32622.1	25505.3	22720.3	24473.3	26701.3	22308	22390.3	26497.8	65783.3	22019.3	21111.4	21256.2	31714.1	22947.2	33632.6	43299.5	39930.5	28393.1	24927.4	23916.8	29465.5	28000.7	30084.6	32085.8	34994.5	23277.3	21895.1	34623.2
20245.4	18080.1	18141.8	19956.7	18265.7	20060	30661.7	26536.2	18554.3	20307.2	25484	25484.2	20781.8	27361.8	22617.1	31322	19070.1	25340.2	19626.6	20142.4	18533.8	24143.6	23628	24267.4	36810.9	17338.1	15131.3	34604.6	32539.4	30971.8	27774.3	32168.2	23875.6	38006.8	38832	32725	25876.6	22245.9	30414.5
22740.9	21833.4	24741.5	25010	23793.2	26392.4	21503.5	21297.4	25195.4	31219.5	29651.4	29671.8	20059.7	29981.2	27361.3	26721.8	21895.4	28640	26804.3	24679.8	23689.6	41660.9	28537.4	28598.9	27609.3	25546	24102.4	29527.5	33653.6	26206.2	27176.3	29568.4	32477.4	29424.3	29426.2	36028.9	29259.1	28289.3	26701.3
20843.7	24762.5	26041.1	28207.1	23339.4	23668.9	18822.5	21132.3	26928.4	29238.9	22101.8	17935.7	27443.8	29156.2	32869.3	23855	31549.3	27918.2	31426	21153.6	23277.3	19483	27856.7	28764.1	29609.9	27546.8	23442.2	27609.1	28124.6	44467.7	51298.8	45582.2	29136.1	29796.1	35552.5	40029.8	19482.3	22431.8	27425.4
24721.2	23050.3	25896.7	23668.9	34025.2	26000.5	27464.6	20369.5	34066.9	24803.9	30084.3	23835.3	26969.3	20761.1	22472.8	21586.2	27877.2	30662.1	31301.3	32869.4	43166.2	33137.7	29899	28991.1	22369.8	24329.8	28042	36006.7	34252.8	35304.4	35056.7	36748.8	29960.5	35015	31177.6	36067.5	29300.5	29279.7	26062
13172.6	20844.1	19028.8	18843.2	23751.6	20307.4	23070.9	23524.8	17935.7	22658.3	21544.7	22266.4	18203.8	21276.5	23070.9	39059.4	30269.8	25257.2	31074.7	27526.3	41949.5	35408.1	29857.3	32395.4	19173.1	22513.9	25278.1	22761.5	37760.1	22246.2	21421.3	38584.9	35676.2	31218.8	36459.6	31652	32560.4	27753.5	34520.1
14615.9	16925.3	19379.4	33013.6	27402.3	31322.3	30785.7	22163.5	21111.7	25504.5	19482.3	23112.1	27134.3	18513	17172.6	25442.9	20946.8	19255.8	39596.8	50638.6	43599.2	32209.1	37966.6	34066.5	34581.9	38049.5	29383.5	29527.1	36480.5	23112.2	29650.9	24927.4	30002	36420.3	37202.5	27608.8	34623	32209.8	37821.2
31301.5	20245.5	22535	21668.8	24907.5	21441.8	21277	21792.1	23483.6	20451.6	24205.7	26660.1	26123.7	23030	21875.2	25380.9	74594.2	43310.9	47398.5	32663.3	18637	17193.5	25360.5	42838.1	33139	31817.8	35592.7	43888.6	32353.3	37780.1	43661.4	38234	20575.8	21276.6	34478.9	26391.6	25772.7	32746.6	36686.6
27918.2	29259.3	23297.9	19894.8	25422.1	25546.2	28227.9	17688.2	21648	35348	22349.7	28207.9	20802.3	25566.6	24019.9	45890.7	24844.6	30971.3	30662.2	35633.9	38770.9	22967.8	29053.9	37119.8	31591	42361	35592.7	29919.5	30848	36750.7	34045.5	32766.3	44673.8	39265.9	22782	25525.5	36583.7	27382.2	37181.8
27134.3	25236.9	30084.9	19276.2	39678.2	30703.1	34458.5	22844.4	29837.1	28104.7	45994.4	47355.9	35510.5	43251.9	44096.6	45622.4	40174	36872.4	24494.9	23504.4	32580.7	26453.9	35860.9	37037	29197.3	31363.5	27279	34437.5	33777.6	40545.9	32167.7	38089.3	38688	44301.3	37862.2	40153	33550.3	27196.4	40279.9
6059.7	30126	16203.8	24329.2	27216.9	33942.1	40525.5	38647.9	30662.5	30682.4	55243.8	37657	30352.8	39451.2	43786.2	48017.6	38935.3	26556.9	37018.1	31239.4	34210.3	36026.6	29279.7	20864.2	30270.4	27443.8	32662.8	34519.8	45767.1	43022.1	44363.6	50472.5	40235.9	46056.6	45477.4	28785	31941	25156.7	42918.3
10348.2	9049.09	40890.6	28868.1	46965.3	32787.2	43806.2	27774.1	30992.8	38112.6	53488.7	40710.6	43537.9	39390.2	53012.2	54725.4	39802.7	42010.2	32951.7	34334.4	27547.3	26165	25257.7	31961.9	30022.3	29362.3	28887.9	37305.5	32993.4	41928	36315.2	31920.4	35778.6	37140.9	34850.8	31920.1	37760.7	40174.3	46489.2
15543.7	24514.9	32933.1	43456.4	28765.2	57306.8	31694	52870.1	31446.5	35881.8	47892.9	31508	31571.8	55366.5	53365.9	47872	61933.1	43723.2	46471.6	46818.9	56831.3	46096.7	38853.4	21709.9	42012.6	31652.2	36046.6	31467.2	43520.6	28372	31012.5	27113.6	29258.9	34355.6	35943.3	28248.2	24453.2	33158.5	30187.1
22472.9	21338.7	16100.3	17564.6	28105.5	37079.7	43148.5	50184.3	32106.1	19441.1	34252	32188.6	38276.1	20637.3	30249.2	21317.9	31900.2	39699.2	38214.4	25814.6	39596	32271.5	31054.3	31157.5	43785.4	41619.2	37779.8	30744.5	41396.6	46200.6	24102.6	33343.8	27051.9	39659.6	34602.8	32271.7	30827	31775.9	28454.4
24803.6	21050	19214.3	20142.3	14719	21361.1	24309.6	15131.3	42858.6	37284.8	28413.6	45602.1	30765	27113.6	24906.5	30146.5	29775.3	23545.8	22596.3	25154.2	21152.8	27072.6	23999.2	55511.7	41741.7	35469	34829.6	33900.8	34788.5	31363.3	35719.1	34686	37119.6	36626.3	36502.5	40813.5	37635.5	33777.1	39410.5
20823.5	24989.2	26929.1	41927.9	43227.7	52289	45250.4	40008.5	33261.3	31961.6	33159.5	27320.3	23194.7	30806.4	29279.8	26929.9	36645.7	24576.6	32972.9	32105.9	35676.4	28001.1	44280.5	30311.3	31322.3	20699.2	28227.7	35552.4	36419.4	35964.2	40544.9	33014	35345.5	41865.6	40607.1	41020.9	36191.2	50535.1	43909.1
206
103935	60974.4	61180.3	54344.6	55522.5	70484	72033.1	73307.4	88086.9	67833.9	79680.4	103962	93990.8	86197.9	80168.5	93989.2	89429.4	75478.8	73257.7	129012	59755.7	55604.7	49781.7	68202.9	58000.5	88610.6	83288.4	88229.8	97131.2	114460	93317.4	133508	112840	110488	114579	122597	84644.8	85976.2	106698
74498.9	67080.9	56844.2	60830.7	61613.7	57306.9	87776.4	82854.3	57999.8	76288.6	95765.4	102352	90275.9	102114	101796	113714	64609.2	83977.4	62027.7	66841.5	64688.3	78373.9	63330	69805.7	103108	45883.4	35705.2	89981.2	119582	116004	130326	127057	95162.7	129890	126535	123595	91948.4	80742.9	102031
80295.5	79039.8	94901.9	92754.9	78332.5	94739.7	66293	77709.7	91504.1	109444	94229.3	113675	87316.7	110711	100252	98723.6	80085.6	94533.5	77999.1	71098.2	57339.5	102950	83801.1	92973.2	94329.4	86131.4	81519.4	96572.9	114371	95589.6	106531	111370	125254	110722	106637	104721	93011.9	97286.2	102209
82925.5	87169.2	88042.7	109957	86519.4	90196.6	67932.7	79312	94943.4	93641.3	66306.2	71826.4	94655.8	87770.5	93955	63887.7	98880.7	80184.7	93476	60501.3	67562.6	56799.3	86841.4	77211.6	99394.6	103433	90653.3	67338.1	65704.2	95585.6	100095	95537.7	81973.7	115520	131133	163695	95839.1	94391.8	89664.4
91026.7	78105.9	99423.4	87173.9	121872	90031.2	95291.8	76599	122069	82200.4	103088	73693.7	89910.2	67565.5	56288.7	57526.2	79281.3	84425.7	92910.5	80540	104825	91388.2	106768	90281.8	64024.9	81756.1	108832	105237	93761.9	105455	80577.2	93005.6	88988.6	121502	125746	125639	112255	105015	100252
58128.7	64591.1	62908.8	72049.4	94706.1	87467	82110.8	80527.7	66530.3	83474.7	64133.6	68746.8	58062.7	54309.9	73829.6	147338	121827	88332.9	90813.8	90984.8	116585	106062	87786.5	92157.9	59755.8	92833.6	107934	103501	135251	89519.7	80939	104176	102614	104101	128431	99665.2	124396	110161	122372
59974	64135.1	77430.1	109510	102097	106299	96459.9	87179.7	75938.9	78794.3	58829.2	84961.4	97400.9	63990.3	63537.7	86420.9	78487.4	79708.7	111918	118748	127384	109445	135656	126709	143386	148337	117439	115623	143112	91692.4	105603	93505.6	102406	112560	136136	103855	144737	117345	123905
98034.7	77653.4	62339.5	61719.9	83089.4	79117.9	82776.2	76411.3	85187.9	73483.9	104314	96817.3	90983.9	76227	71766.4	78276.3	158613	123512	112021	95426.1	66016.9	67930.6	99071.2	156721	130468	136476	138783	152024	116953	116235	123333	123565	90786.2	85914.2	92889.3	108240	116009	132308	118105
109275	89668.1	87658	77746.6	90356.1	77032.6	107537	72485.9	78207.8	103334	74356.1	100630	75288.5	85093.6	74854.8	126473	81260.9	78338.8	72748.8	80558.4	86886.4	63511.7	85497.6	127456	97684.3	147545	120972	112043	98229.2	112381	104025	95668.4	96085.2	109025	86109.1	101388	155428	87070.4	100150
85780.2	78720	96181.2	61291.9	94296.7	83432.5	123483	95788.3	105048	99401.4	144393	139100	110379	117403	105972	118846	110257	105650	63576	82717.2	95877	85484.1	120691	141908	123298	122522	80013.6	106150	118893	136890	117666	149620	155486	172242	140566	161379	134820	109569	141100
38697.2	69920.1	38161.6	56073.1	58330.4	70414.4	85132.8	81927.1	77067.4	111181	142568	136943	130610	161490	164099	156470	121187	86619.4	104645	94111.7	123319	101862	101831	81214.9	110081	100233	127749	116870	156151	150878	147131	165572	140331	163485	155406	103502	133597	86522.6	142282
26832.1	25242.4	76145.2	76096.1	132219	91987.6	122431	89515.9	89753.7	119115	154977	140636	143964	137468	140126	153911	135348	143139	112430	120361	108947	108706	92578.6	103459	98712.4	109596	118729	138870	122116	133925	122753	128731	122637	149183	123452	111130	123107	136795	159860
31990.1	68528.6	96124.9	125500	85332.7	152827	97815.4	153710	85840.5	136183	153146	114246	90978.1	149609	137962	133710	170788	121102	148577	142054	126000	106780	84857.1	63969.9	123943	125759	138882	110983	127148	83494.7	109338	117557	121107	123654	144764	108077	99086.9	101879	104110
63574.5	58102.8	58038.6	71076.4	65791	66698.4	79090.8	91955.8	82719.5	72799.5	125272	118497	141537	86262.8	113440	85269.4	109971	108400	130496	78088.7	98603.1	84114.7	86577.4	110403	145365	146814	117961	129149	120999	112560	75284.3	116824	108327	134242	123898	110607	128665	112730	86916.3
71968.8	66931.2	82952.7	81485.2	95175.4	87314.4	89524.2	55790.2	95064.4	87151.5	88742.1	161749	126833	99022.5	81731.3	86226.5	80580.3	97508.7	104034	89725.3	87265.5	109627	77058.7	136990	136274	129026	132340	119457	126249	117379	148640	132488	141782	137943	138292	163316	155189	132765	117491
63148.6	83927.4	81466.6	145759	138102	163889	135548	133192	105424	100613	104879	131766	95291.8	89933.8	103853	85376.4	144169	109569	134476	122202	148230	128652	162443	102676	76499.9	53725.2	72790	105579	123485	122056	159362	130954	144565	155866	161213	159517	141494	177900	153086

## Sheet: BH14 - Image 1
BH14 - Image 1		WC1 Correction factor: 0.74929
238
2.30163e+06	3.63495e+06	4.78706e+06	4.88663e+06	4752456	4.04578e+06	3.43266e+06	3.76205e+06	4112796	4.90356e+06	6105469	4954636	4.1206e+06	4.84826e+06	4.35217e+06	4.18321e+06	4777360	4.87761e+06	4289934	5.60028e+06	7668976	9561136	8968455	11080669	12930092	13845342	12705686	10902418	11260528	5922059	4243515	4.08809e+06	6644855	6.93464e+06	4.05342e+06	3.27272e+06	4322245	8486101	2.49793e+06	779319	617346	685983	783434
4665760	5909417	5.81455e+06	3.2657e+06	2.35141e+06	2.20982e+06	2.38158e+06	2.96155e+06	6555293	10040761	11073272	6749477	5010432	6364852	5588009	5.89157e+06	6790889	8077053	10981312	10724921	12011036	9191047	7.53293e+06	9424993	11456825	15099126	13011861	14212134	16528402	10215629	5.29271e+06	4.35339e+06	6801712	7346451	4529231	3.4919e+06	4.13899e+06	9198438	3286029	1.27148e+06	785541	598080	688082
6.17796e+06	6647651	3.1953e+06	2.84144e+06	2.6625e+06	3860499	6.99239e+06	7.54595e+06	12217341	13280132	12592714	8351207	7779298	9292078	9562621	10545061	11404781	10714992	11614701	10090461	11624862	7.61184e+06	6205078	8036775	12064636	16202940	13623643	13011923	15094027	12115304	6564810	5.27766e+06	6.06106e+06	9237604	5.62651e+06	3.98923e+06	4.07827e+06	9587195	3879623	1.54144e+06	1.25407e+06	1.20009e+06	1.50458e+06
7.11828e+06	4297861	3.19365e+06	3.76268e+06	3.39118e+06	6412021	10715639	10079839	13903052	14300224	13752164	10839921	13658942	14109837	15180139	15577420	14525210	10140131	9334114	9645120	10079465	4580613	5069135	6923063	11196211	15026331	13787849	12715624	14349166	11290412	5.5306e+06	5.14527e+06	6.22163e+06	9505251	7443490	4.15604e+06	3.96687e+06	7401547	2.55325e+06	1.51615e+06	1.76581e+06	2.0368e+06	2.23322e+06
4.53404e+06	4171498	3.06861e+06	5.36351e+06	7.7406e+06	9706815	10898041	8.20602e+06	9145069	12939699	15693545	13624456	13381278	13270608	16874834	16793382	11416816	8.33055e+06	8997033	9978180	5242947	4443457	5.28566e+06	6795848	11010700	12375827	9814420	10775955	14635613	12875765	7565523	5409938	4838862	8.3038e+06	7.11433e+06	4486837	3778329	7.9152e+06	2.23346e+06	1.26142e+06	1.52142e+06	2.17012e+06	2.67888e+06
4.98927e+06	3905854	5413666	8.18777e+06	9693507	11397991	13440088	13492400	8510713	11290284	13297615	13467495	11899109	9904766	11120694	12306294	6571478	5426218	6971481	4.80444e+06	5404305	5.84621e+06	5.90745e+06	11323610	14527881	11945817	8557832	8892749	12859450	12730121	9412256	6.71843e+06	5931124	4887028	6491348	5.14238e+06	4.19104e+06	10247539	2.97693e+06	1.29551e+06	1.52021e+06	2.19329e+06	2.30709e+06
4.74075e+06	4.52066e+06	4588143	5.75137e+06	6.59889e+06	4.789e+06	6087069	8388598	9878828	8347201	9984121	11055895	13282264	13096653	11874081	6876942	4.15777e+06	5182032	5.026e+06	5.65319e+06	6.7486e+06	8.1196e+06	12937738	15880438	17077558	16444262	12815857	10006519	11379720	17468748	13459891	7250027	6.53252e+06	4821397	7.64397e+06	7269363	5347378	13369943	5.18578e+06	1.97329e+06	1.87934e+06	2.03535e+06	3.12304e+06
8111552	7870350	5311494	3.97474e+06	4.38132e+06	3.33889e+06	4843444	8630103	11413811	8941313	7.19e+06	9151500	10202252	9535090	9908514	6239116	4556749	4978023	5.04295e+06	7.14895e+06	9944385	10999940	10443873	10877773	12903718	14078923	13004168	13797959	12090302	14828930	12748147	6276501	6.15576e+06	5850406	10350877	8128041	5.26012e+06	10937405	6462572	2.19837e+06	1.88014e+06	2.23237e+06	4.2128e+06
4702570	7.52924e+06	7.74002e+06	6676664	3.45753e+06	4353713	7.84e+06	11030752	11207951	6.94839e+06	4069597	3.61869e+06	4457847	4.34283e+06	4230561	4890505	4788437	5.00264e+06	8.01438e+06	9106262	9194451	7.22302e+06	5748949	5.5595e+06	5672472	5.57479e+06	6.00206e+06	8.32785e+06	10103876	10570559	12459788	7.18375e+06	6273027	5574270	7.71485e+06	7527052	4677290	3718022	7.10835e+06	2313932	1.53806e+06	1.92641e+06	5059548
3.5081e+06	4.3688e+06	7116520	5.07313e+06	3.85851e+06	7177983	10778990	8.26294e+06	5571804	3.5314e+06	2.68918e+06	3.12017e+06	4044028	3.83265e+06	3.55257e+06	3.75635e+06	4.52528e+06	5609484	5116900	4605982	4783660	4.81314e+06	4660619	4798601	4.15883e+06	4.096e+06	4606306	4820447	5.05874e+06	4991109	7.14876e+06	6.31751e+06	6.1558e+06	6.05958e+06	8453570	10650406	7.57312e+06	4.1433e+06	7590819	4153012	1.69343e+06	2.35498e+06	4.04791e+06
3.37325e+06	4.39646e+06	5983329	3.4872e+06	4.76103e+06	8207005	6904226	5.71591e+06	4609525	3.16094e+06	2.34996e+06	3.23683e+06	4105092	4.34818e+06	3.253e+06	3.55728e+06	4805162	5.08336e+06	5.02768e+06	4.18289e+06	4.06433e+06	4.80168e+06	5582835	5229597	4.7149e+06	6387695	6953836	6.78778e+06	6370366	5353767	6.27375e+06	5805615	5.52029e+06	6.0035e+06	8025235	10900035	9602543	5.43921e+06	6.02605e+06	7.66628e+06	2.21884e+06	2.21919e+06	2.7414e+06
3.91075e+06	7223976	4913840	4.41825e+06	6280911	7.85884e+06	6.7287e+06	5625680	4.90634e+06	3.27322e+06	3.24102e+06	3.73463e+06	3.09892e+06	3.68825e+06	5.22261e+06	5233271	6854980	6.96411e+06	5.1322e+06	3.86658e+06	4.12104e+06	4411231	6.1587e+06	7787019	7893134	7773954	8.3077e+06	8784402	9641827	9936915	8.08715e+06	9819685	10728186	10027967	8937469	7736424	9814265	6119380	4.41373e+06	8655098	5252891	1.90196e+06	2.15635e+06
3.88312e+06	3.70171e+06	4.05348e+06	4922842	5.48989e+06	5840697	5666387	5.52818e+06	4.28676e+06	4.66298e+06	4.54661e+06	4.58296e+06	6434692	7.26163e+06	6.21671e+06	5.21409e+06	5.36939e+06	6.51103e+06	7.25727e+06	7268954	9372444	5.42794e+06	5176195	5373318	4703466	4.50004e+06	4.16441e+06	4.48479e+06	5.26001e+06	5883981	5365372	5182477	5480210	5.86474e+06	6.65818e+06	6931024	6617163	5.33498e+06	4.15397e+06	6279308	7553067	2.00689e+06	1.69694e+06
3639353	5013077	4283955	4635161	4402416	4.34328e+06	4181486	3.89042e+06	4906270	6851091	5649509	5101991	5390088	4957118	3.60549e+06	2.66737e+06	2.72536e+06	2.65656e+06	4821262	6.5204e+06	8.22476e+06	6296488	4.55256e+06	4.32212e+06	3.51346e+06	3.29338e+06	3.30828e+06	3904952	4.20932e+06	3.64021e+06	3.38872e+06	3.24609e+06	3.16533e+06	3.09144e+06	3.46015e+06	3.93931e+06	4.07007e+06	3.07348e+06	3.31058e+06	4436590	2.63655e+06	923720	828063
2.91672e+06	5.13419e+06	6586683	4.84649e+06	4.02375e+06	3.25386e+06	2.86078e+06	4093582	6.16759e+06	7.02123e+06	5.15935e+06	4.00818e+06	2.40268e+06	2.72896e+06	4.16807e+06	4.10399e+06	5156521	4441810	4.94665e+06	4649737	4695756	4403647	3.58957e+06	3973809	6065200	6895238	7001852	7.60356e+06	8088233	7155892	6382985	4.80233e+06	5067895	6028134	6450272	6963734	7.23971e+06	5554337	4.74446e+06	3.9274e+06	3.26955e+06	1.8201e+06	1.29209e+06
3.99256e+06	5084527	8487766	7909133	7497247	5.12716e+06	3.79807e+06	5842842	6437142	5059369	3.46465e+06	3.48326e+06	5224844	5684890	5452860	3.57786e+06	2.83572e+06	2.54852e+06	3.98514e+06	6.4413e+06	7.11529e+06	5569274	6303004	5726385	4.73192e+06	5157741	4562559	3.81915e+06	3.7484e+06	3.48631e+06	3.46841e+06	3.84779e+06	6057109	6477249	7.05481e+06	6415449	6838580	5.42308e+06	4.32405e+06	2.51507e+06	1.81638e+06	1.60421e+06	2.33468e+06
4.17077e+06	4.04063e+06	7.2683e+06	9056985	8829966	9090773	7980200	6776956	4.36951e+06	3.17961e+06	3735021	7208902	5195621	1.31471e+06	534718	395357	420520	448330	458000	736763	957411	837456	1.02419e+06	1.29935e+06	1.65763e+06	1.97508e+06	1.00653e+06	717844	882674	829485	888195	773140	596327	535387	735626	859799	736400	610612	736310	821356	862474	1.13838e+06	1.72874e+06
2.8539e+06	3.64552e+06	5.25864e+06	5.45521e+06	6141283	6639285	7459322	5371074	3.43585e+06	3.28083e+06	6.51321e+06	5528384	1.3988e+06	652106	652468	638695	538461	507834	525452	624123	838874	1.08017e+06	1.20213e+06	1.29844e+06	1.47927e+06	1.13896e+06	836978	959464	1.12729e+06	1.43847e+06	1.52524e+06	1.21779e+06	991543	989127	1.21236e+06	1.51261e+06	1.33905e+06	1.51775e+06	1.65751e+06	1.36762e+06	1.23373e+06	1.75951e+06	1.836e+06
4602739	3.55822e+06	3.76373e+06	3.22146e+06	2.9471e+06	3.57085e+06	4817147	3.54853e+06	4306124	7377890	4873494	1.41273e+06	826022	932894	837212	810666	836765	969274	1.49299e+06	1.17021e+06	878729	1.03016e+06	1.17482e+06	1.86884e+06	2.29892e+06	2.33077e+06	1.872e+06	1.49426e+06	1.74655e+06	2.20425e+06	2.59337e+06	2.04568e+06	1.47415e+06	1.56742e+06	1.79252e+06	1.66366e+06	1.74902e+06	1.66486e+06	1.41196e+06	861694	1.23963e+06	2.03656e+06	2.39163e+06
1.76009e+06	5943859	5597964	4.61224e+06	3.13113e+06	2.67142e+06	2.65476e+06	3.55213e+06	6280378	6042882	2.09672e+06	1.10685e+06	995413	1.30226e+06	1.45913e+06	1.55345e+06	1.54718e+06	1.86431e+06	1.87786e+06	1.55449e+06	1.21636e+06	1.33484e+06	1.48718e+06	1.95853e+06	2.63655e+06	3.52046e+06	3.33992e+06	2.84144e+06	2.25803e+06	1.84323e+06	2.30702e+06	1.92194e+06	1.70033e+06	1.77258e+06	1.96829e+06	2.07348e+06	2.39657e+06	2.76815e+06	2.30378e+06	1.78989e+06	1.46468e+06	1.37541e+06	1.34271e+06
547912	2.51756e+06	3.99708e+06	5.4892e+06	6307426	3.39356e+06	2.77154e+06	5.93364e+06	7.63005e+06	2.85637e+06	1.18951e+06	1.66816e+06	1.59577e+06	2.12356e+06	2.52917e+06	2.91226e+06	3.36992e+06	2.87793e+06	2.46945e+06	2.1982e+06	1.36818e+06	1.09016e+06	1.72969e+06	1.97251e+06	1.9235e+06	1.88729e+06	1.97377e+06	2.41238e+06	2.33291e+06	1.7176e+06	1.78592e+06	1.65686e+06	1.93671e+06	1.81324e+06	1.92399e+06	1.99082e+06	2.03719e+06	2.37177e+06	2.38982e+06	2.32262e+06	2.01298e+06	1.52469e+06	1.31307e+06
755524	701704	498522	587338	5297391	5579061	4.13437e+06	7658252	3.19047e+06	1.62819e+06	1.67606e+06	1.89339e+06	2.59537e+06	2.44742e+06	2.27524e+06	3.25082e+06	4.2017e+06	3.60081e+06	3.38855e+06	3.273e+06	2.32831e+06	1.80501e+06	2.11501e+06	2.00052e+06	2.07704e+06	2.10373e+06	2.5664e+06	2.84132e+06	2.17311e+06	1.98924e+06	2.65754e+06	2.73762e+06	2.31105e+06	2.20822e+06	2.56792e+06	2.69679e+06	2.61685e+06	2.69067e+06	2.22474e+06	1.51392e+06	1.75025e+06	2.34207e+06	2.09e+06
235
16776	25729.9	35150.4	35081.2	35244.8	28347.6	24213.3	24968.4	29700.6	36182.5	45057	37523	29826.4	35213.4	31305.2	29146.7	34804.2	36207.7	30581.6	40890.3	56488.3	71026.4	65415.1	83241.3	94836.4	102804	94180.9	78877.3	83978.6	43163.1	30115.9	28964.4	47562.2	52125.9	28763	23879.9	31387.2	63087.2	19482.1	5766.38	4174.73	5061.76	5464.32
33753.3	41884.6	42061.7	23999.3	16870.4	16178.4	17405.3	21098.7	47455.5	74066.6	82743.9	50105.5	36465.8	47624.9	41802.7	43753.9	49809.3	58395.6	79645.5	77580.2	91006.4	67394.8	54467.3	68594.8	84545.3	112538	97368.9	103183	121825	77354.9	38857.3	30587.9	51817.2	56576.4	33967.4	25566.2	30701.5	68458.6	25466.5	8955.85	5709.73	4413.91	5068.04
45862.5	50671.4	24012.2	20450.5	19173.3	26611.1	50004.3	54328.9	89030.7	99478.5	91920	61701.5	58408.3	69671.5	70546.4	76792.9	85187	78064.9	86364.9	76326.7	84570.3	57686.3	45088.4	59591.6	87310.8	121711	104228	95844.1	111347	91334.4	48689.1	37227.2	43489.9	68141.4	41601.7	28951.7	30179.1	71608.3	29305.6	11157.9	9094.26	8389.57	11164
54102.3	31790	23514.9	27082.7	24043.5	45151.7	76843.4	73921.7	102761	107423	101009	79909.8	100612	104612	113596	114503	107870	75029.9	68116	71100.4	76215.1	33677.1	36000	49784.3	80823.5	109760	103560	94741.6	106338	83966.3	40556.8	37258.6	45013	70641.1	56621.1	30185.1	28825.7	56325.4	19211.6	11289.9	11969.4	14838.2	15945.5
33174.3	29555.8	22577.4	39072.2	57671.6	72347.5	80741.6	58943.3	68645.4	93131.6	116009	102212	101418	98659.6	125328	124377	82877.1	61612.4	65736.2	73543.8	38353.9	32709.3	38555.2	50401.2	81227.4	95195.1	72693.5	78833.1	108430	96191.1	58082	40984.6	35244.7	60731.6	54108.9	32664.6	28228	58485.9	16864.5	9496.85	10994.3	15335.1	19620
36704.9	28228	38341.4	61411.3	71893.8	83802	98684.6	99881.4	63590.5	85420.2	97941	103806	87353.5	74141.9	81219.8	90893.5	50842.4	42482.6	50218.3	36012.5	40298.7	42941.4	42828.9	83034.8	110295	89703.1	64981.8	64666.5	94722.6	94023.2	71366.4	49223.7	43049.3	35459	47801.2	38095.9	29486.6	76268.9	21218.7	9333.32	10503.5	15316.3	17096.9
34175	32639.4	32595.3	42293.8	49059.9	35653.9	43471	62739.5	73751.3	62720.6	76629.2	83417.4	99680.1	99787.2	87164.7	52334.8	28750.2	38429.3	36352.6	40236	50281.2	58989.3	93992.5	117269	129209	122467	93910.4	73771.1	82694.7	131434	102440	55065.8	49966.5	35692	55676.4	55254.7	40097.3	100847	39672	13661.8	13516.9	14718.6	22042.5
60693.4	57860.4	39719.9	28511.1	32274.3	23861	33552.3	62406.2	83663.3	67046.3	53529.5	67813.8	74966.7	71560.3	73820.5	46265.9	33407.1	35855.2	36623	52346.3	74827.9	82109	75785.4	79677	94495.7	104851	96297.3	104184	89545.3	109973	92419.2	46624.4	45660.9	42243.8	77649.6	61544.3	39121.6	81011	48926	16046.2	13938.6	15926.7	29833.3
34005	53749.6	55896.3	50294.3	24716.8	30562.8	56859.9	82366.3	83297.8	52591.9	29555.8	25918.6	31525.5	31651.3	30417.8	37145.3	36176.2	37963.8	59938.1	68028	68172.7	52839.2	42702.8	39505.5	41236.3	40619.4	43810.5	59201.8	73720	78865.1	93494.4	53662.5	44433.7	42910.8	56576.3	57004.2	35282.9	26252.4	54052	17550.5	11252.1	13976.4	36888.4
24993.4	30827.1	50627.4	37838.3	26988.3	52359.6	80407.4	61386.4	41998.2	24691.5	19255.1	22048.8	29731.9	27793.9	25635.5	26938	31393.4	40865	37265	33860.1	33797.2	35042.1	32381.5	35389.6	29952.2	28542.7	33684	35332.9	37132.8	38089.5	54039.3	48104.1	44792.7	46183.8	60757.5	82069.9	55815.5	29895.6	56627.7	32351.5	12214.6	17392.7	29140.7
24169.3	30235.8	43709.8	24616.2	33716.1	61102.7	51181.4	42268.5	33577.2	23521.2	17386.4	22577.4	29102.8	31802.4	23754	25031.4	34854.6	38315.9	37774.9	29939.6	28479.7	35405.6	40833.5	38995.8	34835.7	45812.3	53189.5	49954	46674.5	40166.4	46680.8	41557.3	42142.8	44024.7	60247.7	82756.6	70761.8	42413.5	44037.7	58963.4	16379.8	16455.1	18676.3
26932	54121.3	35842.9	32513.5	45220.4	57571.1	48581.7	41330.7	37132.8	24508.9	24018.2	27290.4	21476.1	25295.6	37932.3	36692.3	48865	50828.8	36994.6	27133.1	31047.3	30678.8	44805.1	59088.1	58735.5	59528.7	61127.7	65484.4	74192.1	74727.5	60045.1	73058.8	81836.9	76817.9	66970.3	58131.2	73707.7	45258.8	30417.9	62728.3	39854.4	14378.9	15586.9
28983.2	27309.3	29203.4	36484.6	39555.9	42608.5	42117.4	41179.7	30757.6	34628	32803	33564.6	46020.2	53126.5	46391.2	37460.2	38001.4	48770.5	53900.8	53724.7	69841.3	39685.6	37957.3	38813.2	34074.2	32110.6	29241.1	32866	37686.8	44062.3	38523.8	39128	40317.5	43250.4	49519.6	52710.9	48191.4	39247.5	29058.6	46379	58277.4	14762.9	11912.7
25213.9	37818.8	30959.1	33835	32469.4	30405.4	30392.9	28045.6	34672.2	50501.4	41582.5	36824.4	40374.1	37384.9	27233.8	18984.5	19242.6	18959.3	35383.9	49362.3	61360.7	46080	33130.3	29763.4	25327.2	23546.3	22722.1	27932.2	29870.4	26692.5	23867.2	23930.1	22759.8	21526.5	24748.2	28196.7	30493.4	21620.8	23269.4	33111.4	18676.6	6533.82	5866.95
20985.4	36384.4	48506.2	34772.9	29052.4	23319.9	20324.8	28397.9	44711	52705.1	38372.7	28870.2	17361.3	19525.7	30329.9	29171.8	37774.8	32494.5	37139.1	34351.1	33942.1	32323.2	25150.9	29077.6	46800.3	52314.4	52352.3	55197.5	58294.9	52194.8	47442.4	34917.5	36088.2	42853.8	47650	50866.7	54310	41085.3	34225.3	27932.4	23502.4	13347.1	8993.67
28800.9	37284.5	61990.3	59321	56305.5	38826	27712	43005	47266.1	37064	25062.8	24232.3	38265.6	41047.5	40046.8	25075.4	20387.7	17826.7	28876.4	47064.8	53019.4	41296.6	47606.2	41576.2	33835.1	37781	32935.4	27705.7	26717.7	24848.9	24358	27202.2	43124.6	48342.6	52887.1	47033.4	49406.2	41324.6	32444.4	18009.3	13001.1	11340.2	16247.5
31255	28077.4	55260.5	67782.4	66290.4	68500.2	60391.3	50382	31884.3	23640.8	25956.5	52018.8	39072.1	9377.45	4004.85	2834.95	3023.57	3306.76	3445.1	5521.01	6747.79	5678.95	7263.51	8458.85	11919	14794.2	7483.79	5061.7	6238.1	6288.48	6703.6	6080.82	4495.6	3916.79	4917.1	6382.82	5231.73	4111.85	5451.82	5923.63	6521.26	7980.88	12088.9
20563.7	26887.7	39341.8	39146.8	44005.8	48757.9	53989.1	39625.3	25899.7	24301.4	48009.3	42250.3	10340.1	4885.6	5212.73	4418.09	3476.51	3803.7	4099.23	4766.2	6099.7	8195.31	8691.63	9402.48	10736.2	8307.98	6332.54	7150.29	8502.85	10453.2	11547.8	8622.45	7313.91	7188.04	8553.17	11453.4	9572.35	10943.8	11755.4	10817.9	8723.04	12183.2	13422.6
33092.5	25484.4	26554.2	22967.4	20758.9	25100.5	35100	25169.9	31154.2	55355	35994.4	10390.3	6420.54	7049.7	6187.79	5879.57	5948.76	6948.95	10610.5	8068.73	6074.54	7043.45	7854.95	12900.5	15901.4	17380	13888.2	10421.7	12504.1	16706.8	19091.5	14756.4	10855.7	11201.8	13189.8	11843.6	12573.3	12416	10862.1	6036.76	9408.82	13731	17493.2
12083.3	42577	42425.8	33281.4	21929.2	18770.6	19531.9	25943.7	44837	46013.9	15543.1	8169.45	7301.35	8892.95	10660.8	11384.2	10943.9	13529.4	13730.9	10365	8867.73	9945.61	10377.5	13818.9	19179.5	26214.4	23389	20217.7	16058.8	13340.7	17455.4	13592.5	12069.9	12837.4	14850.8	14555.1	17405.2	19871.6	16341.9	13045.1	11296.1	10207.8	9572.35
4231.45	16934	29430	39247.8	44295.3	25541.1	19286.5	43522.4	57136.8	22477.3	8880.38	11768	11560.4	14630.6	18669.9	20651.9	23848.3	20236.6	17229	15700.2	9981.29	7546.72	12409.7	13856.6	13674.2	13856.7	14618.1	16637.6	17172.4	11862.3	12938.1	12057.4	13605.1	13296.8	13485.4	13988.9	13932.2	16587.3	17329.8	16901.9	15297.4	10855.8	9572.42
5785.16	5275.63	3438.85	4030.07	38093.6	42074.3	29555.8	58156.8	24106.9	11182.9	12252.4	13334.6	18758	17814.2	16329.4	22728.3	30399	25773.9	24200.8	23332.4	16675.5	12781	15461.1	14768.9	15071	15442.2	17946.4	20356.2	15907.9	14309.7	18739.3	19934.6	16939.7	16366.9	18216.9	18405.6	18311.1	18971.9	16404.9	11887.6	12793.6	16115.4	14353.7
232
2400.22	1966.28	1345.62	1563.63	1370.74	1565.76	1427.4	1630.76	1016.39	576.116	406.23	540.512	863.314	886.303	691.303	940.876	787.897	987.053	599.199	372.876	285.056	213.777	314.147	324.9	176.097	115.61	523.741	207.545	133.908	458.741	1037.32	1469.38	1620.28	2117.15	4098.6	4180.41	3167.72	4608.25	5142.97	3614.19	3192.84	3601.69	4803.22
1410.58	1511.21	1412.66	1555.26	1339.36	1374.92	1049.9	676.626	402.137	1247.06	683.043	641.137	737.512	624.335	460.803	372.689	490.137	410.501	179.97	77.923	65.36	171.168	385.355	335.074	184.504	207.22	590.762	209.618	165.66	276.46	840.251	1232.4	1756.61	1689.47	3916.19	4469.85	3758.94	4539.1	4929	4752.94	4815.75	5212.13	5520.41
1356.1	1689.41	1351.95	1938.99	1328.81	882.251	678.772	267.98	345.512	11858.3	2203.21	764.803	506.991	358.043	217.762	134.181	140.735	178.454	274.22	170.079	98.86	342.547	691.408	603.283	448.199	282.73	410.397	347.543	134.181	188.387	666.21	1513.28	1418.97	2186.34	3658.25	4564.13	3551.31	3909.88	5470.03	6489.19	6860.41	12416	14762.1
1626.63	1358.17	1165.28	813.043	961.845	414.73	318.397	177.918	1123.41	2935.03	467.022	376.887	228.746	162.05	78.196	53.344	251.798	316.21	475.491	288.876	209.324	824.842	951.407	796.22	509.085	435.647	364.387	324.827	105.142	232.428	544.678	1381.26	1532.22	2022.85	3387.75	4815.85	4161.6	3494.72	4394.44	4954.19	6721.94	10320.6	14938.2
1450.44	1494.53	846.595	320.345	247.001	188.408	247.064	133.908	3675.57	2796.59	559.345	297.629	270.199	201.254	119.798	165.618	301.879	823.428	699.783	475.543	823.532	1570.43	1469.28	1133.79	655.835	234.47	425.241	184.493	140.735	126.079	374.803	1322.43	1563.69	1915.88	2626.72	3614.22	3683.53	3897.34	5363.06	5878.94	14265.2	15102.1	29253.2
1488.19	957.699	548.783	334.98	439.803	511.158	169.858	230.293	649.47	578.262	416.73	211.46	236.574	98.892	244.876	471.23	739.574	1809.06	1045.66	848.637	1846.72	1590.84	1238.65	525.73	599.241	546.835	888.512	544.803	169.775	211.439	356.316	1356.05	1888.62	2198.97	1764.94	3972.88	4249.6	4067.25	5111.5	4715.1	10415.4	22174.8	22387.9
1349.72	1670.63	1576.25	1746.1	1475.6	1211.44	475.533	207.22	460.772	573.939	475.564	362.262	261.668	129.72	57.532	337.137	1343.44	1425.19	1098.16	1312	1356	591.962	311.97	288.96	293.095	176.371	80.563	280.595	309.949	109.056	243.17	653.689	1362.31	1790.06	1915.78	3243.19	4230.81	5193.22	5583.25	6281.6	5671.31	14706.2	33061.1
2295.46	2242.97	1980.92	1938.98	2073.09	1345.55	567.751	266.17	251.251	211.376	311.939	182.095	219.855	366.449	377.012	823.501	1066.66	1406.41	1205.07	953.439	754.293	331.082	377.001	400.316	297.355	261.772	138.642	153.056	542.626	316.189	343.827	647.407	1412.6	2041.69	2060.63	2909.81	4910.19	3903.63	5470.06	5967	6350.75	11899.7	31606.8
3148.78	2563.81	2318.41	2186.41	1980.86	1289.03	475.439	427.21	504.751	372.73	618.012	546.699	582.428	509.116	913.647	833.97	1003.86	1014.27	498.574	429.345	603.366	994.545	1014.29	997.501	1049.89	810.928	567.678	462.939	301.512	351.814	255.439	716.605	1324.65	1603.49	2047.94	2054.28	4111.13	4450.94	4721.35	5193.16	5312.72	6325.69	34219.3
5230.97	3972.78	2765.03	1934.73	1666.39	917.814	662.074	1425.24	674.553	833.907	957.678	890.543	1003.75	1037.35	1232.35	1356.06	1249.17	1255.47	1171.52	817.199	892.658	1313.26	2110.78	1754.39	1943.18	1337.22	1406.47	1205.1	978.699	1052.04	894.772	940.845	1408.48	1867.7	2054.25	2091.97	3821.97	5457.38	4356.56	5488.85	5960.69	5828.66	18600.4
4041.94	3752.66	2192.69	1473.41	917.855	473.293	775.293	729.116	1253.3	1419	1618.1	1379.06	1393.71	1280.6	1397.98	1398.07	1645.38	1651.78	1471.37	1387.47	1341.42	1372.79	1632.81	1884.47	1664.28	2029.06	1796.35	1834.19	1609.76	1865.56	1853.03	1525.94	1676.85	1947.47	2186.38	2276.51	2922.34	4966.81	4463.44	4476.03	5683.91	4979.35	7457.94
3664.63	2245.03	1620.31	1343.47	532.116	739.626	431.501	871.72	1450.35	1601.5	1502.78	1557.38	1272.18	1555.19	1670.56	1412.66	1941.06	1934.76	1465.07	1387.53	1412.64	1549.88	1972.53	2303.88	2142.34	2305.78	2393.97	2092	2205.25	2362.47	1882.27	2438.03	2349.91	2249.28	1607.71	1760.68	2274.5	4916.41	4947.88	4520.03	5048.5	5501.53	5545.47
1790.1	1538.56	1205.06	984.908	865.439	588.678	664.105	1609.82	1458.75	1720.88	1943.11	1584.64	1915.81	1607.69	1953.69	2016.47	2249.22	2331.13	2198.88	1660	1748.18	1607.72	2016.63	3922.56	4035.75	3897.47	4237.03	3670.91	3639.47	3337.53	3104.81	3998.03	3387.91	3369	3029.25	2532.34	2060.63	3255.78	4199.22	3853.41	4583.03	5218.35	5275.03
2343.56	1951.58	1588.86	1544.75	1236.6	1301.59	1343.44	1322.52	1588.85	1947.31	1777.5	1685.23	1590.9	2349.97	3249.38	3865.91	3803	3947.66	2960.16	2129.88	2022.85	2015.81	2268.19	2821.69	3608.03	4230.78	4293.66	4538.97	4457.28	3960.28	3972.88	5048.47	4878.69	4419.38	4255.97	4545.31	4639.66	3607.97	4167.85	4645.97	4463.5	5067.38	10887.3
4117.56	3104.66	2161.16	1695.72	1649.5	1534.27	1486.06	1242.88	1683.1	2513.44	3224.31	2731.51	3513.53	3129.91	3274.66	3318.69	3243.16	2834.28	3155.03	4362.85	3620.63	3458.34	4274.81	3652.09	3733.81	3670.97	3601.69	3868.07	3589.03	3343.78	3079.59	3532.53	4067.22	4048.31	3652.03	3803	3595.41	3576.59	3865.94	3551.34	3752.69	4916.5	4532.75
3865.91	3828.06	2871.94	1639.19	2060.53	1708.28	1242.78	1194.6	2047.94	4299.97	4029.44	3549.27	3249.53	3073.22	3677.25	3444.44	4092.38	3576.56	3092.22	4228.62	4048.31	3637.4	3620.63	3658.44	3903.63	4551.66	4664.85	4048.28	4243.35	4086	4042.03	4073.47	4463.47	4274.78	4419.53	4526.41	3960.28	4331.41	4060.88	3616.45	3714.91	4419.6	8061.97
3394.13	3582.81	2318.41	2406.56	2045.92	1959.85	1922.16	1815.16	4054.56	4652.31	3564	3519.84	3683.44	3570.19	3935.13	3557.69	4104.94	3721.22	3419.28	4274.66	4299.94	3849.79	4017	4973.06	4539.06	3815.63	4023.19	3639.44	4312.56	3834.47	3582.66	4079.69	4394.35	5054.81	5180.63	5337.94	4432	4476.03	4182.58	4828.31	5230.94	5595.78	10307.9
2865.78	4337.78	4249.56	3350.09	2733.63	2180.19	2129.75	3457.06	4136.35	3406.66	3501	4016.84	3803.03	3608	3878.41	3375.31	3356.34	3513.66	3060.72	3457.06	3771.59	3816.18	4438.31	4218.13	4142.75	4513.85	4111.22	4274.69	4400.63	4331.28	4167.81	4023.16	3910	4375.47	4211.85	4841	3740.13	4155.28	3664.63	4526.41	5010.69	7678.13	11169.7
3117.41	3695.97	4054.69	3614.28	3941.34	4214.04	4004.22	4174.1	3790.5	3796.66	4073.47	4677.47	4042.03	3784.06	3331.16	3771.47	4218.1	4400.6	4545.25	3865.81	3689.78	3877.81	5709.19	7898.31	6967.25	6287.91	5470.06	5407.16	7168.56	7539.62	9231.97	5948.19	4847.16	4727.75	4583.1	4287.38	4117.6	3985.44	4287.35	3903.69	4702.51	7426.6	14340.5
3475.81	3400.44	3526.19	3375.28	3079.69	4174.1	4903.88	3828.19	3136.16	3356.41	4218.31	4048.38	4067.16	6589.81	12006.5	11301.8	9068.47	6482.88	5224.72	4765.44	4394.35	4353.12	7042.75	9836	16599.2	22532.7	18071.6	13164	9395.59	11100.4	15416.4	16410.5	15636.6	9955.5	10760.8	12679.6	13573	12981.5	10232.4	6004.75	4557.84	5507.78	7747.28
3218	3593.31	3224.31	3677.19	3551.34	4243.22	4243.38	3482.28	4211.94	3953.97	3872.28	4797	6017.44	15580.1	22633.4	19644.5	19827	10949.5	5753.1	5230.97	4595.56	4436.87	7395.03	11610.1	14900.6	22683.6	20519.2	19606.8	19304.8	15548.5	22790.7	27365.3	22551.5	16228	13679.9	15982.7	14875.3	18939.8	19034.1	19971.6	13409.5	5759.44	5696.56
3551.31	4520.19	4023.09	3752.66	3985.47	4148.97	4432	3840.69	4935.35	4570.5	4394.35	6344.53	15378.6	17316.4	21702.1	23514.3	26043.8	19506.1	16354	17952.1	11295.6	6986.84	7099.38	11364.7	18071.7	42602.1	59150.4	63538.2	38165.2	21576.3	28013.4	42406.8	35829.5	24307.1	22941.7	33343.7	39901.5	44489.7	32267.8	19562.9	15233.9	12629.3	16952.2
208
28019.5	30668.9	36194.2	37912.7	34866.2	30347.7	27849.5	25042.9	23822.2	19707.1	24677.9	18083.7	28705.4	63097.9	157190	55971.2	47875.8	32147.7	21733.2	26792.3	23677.5	26430.5	28403.8	45924.5	49927.7	42500.3	62065.2	48260.4	29894.7	25816.9	31354.7	37087.8	48278.7	58325.6	52288.3	59288.9	63254.6	55599.5	66560.3	112368	431294	194390	96025.7
29771.2	31115.6	39152.4	26465.1	16278	14201.7	13075.6	16045.4	29139.4	34910.3	33437.9	19751.2	23495.3	168564	117512	48090	35237.7	23809.6	30070.7	25879.9	24558.5	16468.9	37427.8	48750.6	46730.2	49367.6	58186.7	40958.5	36515.1	38145.1	34815.8	39284.4	60321	62423.7	65596.5	72566.5	89311.4	99319.9	103736	173322	311590	218801	58326.6
49124.6	55335.2	39504.8	24552.3	13515.9	16448.1	35313	28006.8	33236.3	75221.4	36503.3	20430.7	35055.8	85924.4	40732.4	29775.1	36565.8	33972.7	27648	24495.6	16800.2	18040.6	33557.3	45899.2	53597.6	55511.4	57192.2	43010.5	26100.1	25823.1	34879	47240	53849.4	73297.2	124886	144357	201477	154091	144378	208629	252507	216243	67278.4
61460.5	56367.9	31386	20588	13226.6	15240.1	26804.8	21450	37000.3	51161.8	23992.2	17215.5	55077.6	80615	45679	43708.8	41644.8	18304	13748.7	16460.5	15283.9	15909.6	35741.2	49411.6	47385.1	39372.3	48605.8	38900.4	35873.2	21575.9	27188.8	52640.7	65666.8	79619.3	188642	271861	270048	181578	226193	229545	192935	97569.4	43954.7
53239	34501.6	27245.3	25137.5	16951.1	20046.8	32713.8	23394.3	40809.3	43306.5	21330.4	40381.6	139453	61771.5	46761.6	42777.3	26968.8	21991.1	21613.7	27352.3	17958	39274.6	69676.8	80526.5	79865.1	54227.2	56449.3	27126.3	23797	19946.2	24011.1	39391.3	46503.8	96291.6	173754	277497	238045	123947	142009	177426	126145	63815.2	84319.2
59012.3	45282.4	53188.8	52936.7	51885.4	51010.9	32437	25772.7	63672.1	55996.1	110156	112650	87844.2	50588.8	48304	105931	142049	157610	107857	84808.5	101499	100324	95811.9	79638.5	94874.2	95836.5	123741	81253.3	38296.2	32720.2	46736.5	53383.6	60572.7	86637	128706	192513	165415	130879	133638	123884	90911.2	216348	664704
66459.1	57286.5	60069.1	61309.3	61882.2	32884.6	14648.4	13308.4	66444.3	80815.8	73612.4	132564	186653	115653	51590	115270	214471	220411	126437	106992	91258	63473.6	62984.2	78001	94199.2	74671.8	33928.7	52469.4	62952.8	70747.2	63216.8	62064.9	69544.2	149177	135851	145247	134363	154060	164127	164367	176247	245416	180008
64186.7	46856.2	32713.9	32304.8	27327.2	14025.7	12685.5	25584.8	43665.5	46385.9	49292.1	49430.5	50049.3	138308	186155	116482	96260	51256.2	50765.4	69853.1	110514	83351	46082.3	33292.8	49644.8	55624.7	40083.8	33318.2	91365.9	61286.6	35917.3	43148.8	65931.2	125574	134975	130381	130859	139607	162432	155535	96879.2	71239.3	92559.1
54190.2	31795.2	25124.9	21487.7	18971	18769.7	33116.8	49571.3	53523.5	22035.2	20783.2	25194	31618.9	32273.4	55950.2	136842	232105	151264	114827	88687.8	113016	71248.6	57582.6	45024.3	43614.4	46503.6	39567.4	36861.2	42745.9	71364.6	63607.3	49015.2	49147.5	82259.7	91981.8	67724.8	65483.7	72270.9	69638.9	75501.2	72982.4	66509.7	97986.1
70854.8	45855.5	28774.6	23664.8	20424.4	38120.6	49405.2	84456.1	81559.1	44176.7	18813.6	21928.2	27365	31839.2	33500.7	50318.2	66358.7	67051.1	52483.7	45924.4	45653.8	52455.6	49418.1	60522.6	46906.3	49782.9	45861.5	41921.3	49468.1	261251	203365	155601	86124.8	91294.9	104951	112934	88492.6	84449.3	84720.1	116684	103899	93556.8	97695.8
106415	69601.6	49065.4	37862	40606.3	42771.3	61300.5	63607.4	84008.4	62948	22173.7	20216.8	31046.3	46572.8	28994.8	28843.7	44269.1	53566.1	52250.6	30977.2	25307.2	52601.1	55800.9	53383.5	57437.7	61473.2	73442.2	75507.2	75640.3	264747	151848	120072	156932	184905	184577	169064	138877	124054	121962	130557	132725	123109	81798.4
91837	92139.1	174518	157462	101941	98162.5	51893.4	53049.8	50160.7	66100.6	40260.3	32235.9	34778.1	39668.2	30964.6	25722.6	44835.6	50122.9	48498.8	39215	55545.5	86511.6	74021.6	58992.7	59641.1	62801.4	71546.7	80280.4	90086.1	123815	113431	100365	98878.9	94677.8	103818	124547	112354	96378.6	100177	129461	143792	137987	107233
47316.1	95982.3	60190.2	47347.1	51469.9	41537.4	39737.9	62467.7	64640.4	73260.7	31008.6	31184.7	32563.3	45722.9	37584.9	33186	40222.1	46239.2	44709.7	59974.9	95838	95457.8	71540.8	60447	53943.9	62820.2	59042.9	66623.3	91901.7	124368	76105.9	87926.2	63292.6	66850.2	83303.3	138142	77819	68260.1	100871	137016	127116	125623	99886.8
34961.5	32978.6	47516.8	51287.4	38730.6	36615.7	44414.4	60585.3	51639.9	40405.2	20594.3	18454.9	17234.3	35665.6	43734	35753.6	45786.1	33431.3	50841.5	63046.9	88790.8	97591.4	60384	59024.2	63745.9	68870.7	69198.1	80085.7	143357	112654	78630.9	150481	98226	69443.7	132261	175600	93318.9	65779.8	127094	168522	157471	201864	289240
51855.9	47291	63764.5	51583.2	43727.8	29555	34678	35999	45748.5	46271.5	30247	25766.7	25577.9	30467.4	40605.9	33953.7	40656.3	46509.8	79432.1	98860.4	92989.6	93655.2	65364	54844.2	55593.3	69582.2	78838.2	82963.1	116374	114578	102425	97103.6	78725	93456.1	132274	102439	85672.1	51955	66209.7	97027.9	192394	259233	122925
63789.3	59836.5	71105.9	65628.2	68140.6	47945	41424.2	42437.4	47013.6	51822.7	37603.8	36376.6	29139.4	27799.1	34060.7	50374.9	64016.4	48536.9	58509	87900.5	85677.4	85996.7	83416.6	57104.6	40335.5	47611.5	56745.2	75583.2	106545	94703.2	75872.7	73359.9	77333.3	94987.9	140931	85313.6	59685.2	52332.5	32707.6	38208	61562.5	114486	81320
41159.8	53289.4	70255.9	73492.3	72421.7	69947.2	66377.8	64614.8	63198.5	47410	39901.2	65515.2	50174.6	29428.9	36848.6	39076.8	50443.8	33922.3	34450.9	81460.1	71616.8	60810.1	77127	91559.7	64344.3	37043.8	33185.8	38170.6	68959.1	58369.4	60723.9	69916.5	64847.9	90772.7	117753	108971	87334.1	65011.2	59710.3	53541.9	74218	43684	41065.5
29479.4	59937.8	86049.1	68090	63091	50847.1	54290.8	69236.2	64218.1	62662.9	69116.4	73051.4	46869.2	23381.7	28107.7	36351.7	24879.3	23067.1	22475.7	35364.1	63815.2	47867.3	52187.6	59471.2	77364.9	71333	52017.6	56166.4	96460.6	66925.3	69676.8	61825.6	54951.1	93994.9	85601.8	90722.1	81219.1	80456.8	88127.2	101714	67889.3	55744.3	44452
61580.8	60302.4	74014.9	61542.4	46333.8	45867.8	62928	74462.2	94740.4	87780.8	66125.6	45232.2	24917.1	26414.7	28585.7	28120.1	17291.1	35112.3	43205.6	54510.5	52622	36767.6	36018.1	38837.4	51973.7	63752.2	65344.9	85690.8	107480	55505	59936.9	51828.8	57248.9	86113.2	71988.7	44105.4	48813.6	59005.5	83964.8	59547.1	62694.2	57122.8	51060.8
59351.5	65772.9	58237.3	51671.5	44621.4	42947.3	51451.2	85312.6	108964	104568	76496.3	51911	24030.1	15460.1	15655	17467.2	19247.8	26761	50739.8	54485.2	59326.3	45355.4	34690	33431.3	51589.9	75375.1	74122.2	72365.2	72126.3	43809.7	60245.6	57211.2	80855.1	113427	101771	58898.3	139445	183666	117581	54177.1	36571.8	30681.3	23507.5
42305.4	63727.3	59647.9	55083.3	44936.3	49738.9	69802.7	101420	124520	104360	61851.3	60906.6	27453.3	20191.6	26156.6	31254	39517.1	43828.5	54944.8	61699.8	40505.2	34401.3	40845.3	49336	39246.6	46919.3	64155	86762.1	84509.7	47290.8	36792.1	50357.4	96712.6	71195	114220	84424.1	130072	164769	90182.5	52188.1	30819.6	28075.9	26068.5
41758.1	60963.5	49890.5	28158.1	42577.1	74325.4	127654	123450	113456	102621	76830.2	55593.4	56847.8	45918.2	43060.7	67709.5	70104.8	74254.4	64048.1	65149.8	54340.7	47464.6	63047.7	55253.3	57110.5	44344.6	49997.2	70069.1	68785.2	52836.8	46245.8	68804.3	103908	83555.4	106029	81257.6	139192	84878.3	69596.3	40064.9	32620	39397.5	43973.2
207
12517.8	12159.3	15802	17173.8	16475.3	14046.6	12404.6	11391.7	11146.3	9825.12	12492.7	9561.09	11662.2	26191.2	60979.2	25907.3	21320.1	13757.3	10095.8	12524.2	11706.3	11271.5	14292.1	22654	23465.8	22471.6	28657.2	21766.9	16500.4	11561.6	14241.7	16374.6	21125	25196.2	23258.2	24743.1	29494.8	25605.2	25938.7	44038.8	177384	79603.3	38387.2
13077.8	14543.7	17916.1	11788.1	6988	6358.84	5817.81	7289.94	13769.9	16915.7	17180	9321.87	10561.3	68719.5	50600.4	21320.1	15330.2	12058.5	14713.6	13323.2	14650.7	9465.29	18614.4	22962.3	23232.8	24157.9	27757.2	21603.3	19080.1	18683.7	15198	16273.9	26196.7	25668	28292.1	28770.5	36353.5	41180.8	42722.9	67615.5	123298	92239	23660.9
19961	23396.5	17280.6	10718.6	6308.5	8114.06	16173.1	13549.6	16311.6	35259.2	18425.8	10970.2	16355.8	36624.3	20149.8	14594.1	18211.8	17456.8	15437.2	13688.1	11536.4	9834.26	15550.3	20766.2	26624.4	27272.7	27216.1	21320.2	15751.6	14619.2	15021.9	20168.7	23050.6	32753.8	53014.4	57503.2	83141.8	64950.4	59290.7	85731.7	103192	87097.6	31226.6
26939.2	23711.2	13599.9	10058	6239.41	8283.94	14581.4	11819.6	18954.3	26851.1	14015.3	10743.8	25989.1	36202.7	24592	23214	21477.4	10768.9	8541.81	9265.25	9579.84	7737.23	15953.1	22081.4	22207.3	20414.1	24390.7	19753.4	19004.6	12656.3	12436.1	22415	28380.2	36498.4	79762.9	112098	106858	74086.6	89943.3	92047.2	76341.8	41113.9	18683.7
24214.6	15512.7	12096.3	11851	9410.03	10838.1	17809.1	11599.3	19162.1	22792.6	13247.7	19936.1	59889.1	29072.8	24422.2	22547	13845.4	10875.9	11951.6	14329.9	8353.06	16953.5	29040.9	32936.4	37077.5	26133.7	25963.8	14770.2	14097	12499.1	12310.3	16940.9	19495.4	40822.4	71317.6	111349	98873.5	52491.9	57685.5	72197.3	51038.7	26630.9	34340
25366.1	19281.4	23113.4	24824.8	24378.2	24384.4	16846.4	14631.7	28072.2	25800.2	48664.8	50288.7	39607.5	23742.8	22377.1	47909.8	60153.9	68696.9	46210.2	36592.8	42836.1	42208.9	40218	34862.1	42968.7	44328.2	54079.3	35278.3	18922.7	16808.7	20602.7	23912.5	26524	36486.1	52164.9	76378.7	67942.6	55929	55148.3	49627.8	35113.8	83831.5	266682
27562.2	24283.8	25309.4	26630.9	26882.5	15374.4	8302.69	8648.81	28576.1	35711.7	32067.9	56061.7	79602.8	51384.6	25196.2	48454.2	90139.2	92790.7	53348.3	45064.3	39947.4	26847.6	29815	36366.2	42364.3	35164.3	17507.1	23504.1	30028.9	34144.7	30287	27492.9	30953.9	59934.5	56168.4	60360.9	56048.5	64459.4	67475.1	65982.9	67135.5	106296	76166.9
28109.7	21458.5	15588.1	14166.2	12561.8	6503.5	6157.62	12323	21540.2	20835.7	22408.6	22943.4	22157	59707.3	79249.9	48746.8	39689.5	23063.1	22150.8	29789.8	46940	37643.9	21987.1	16632.5	23944	26863.7	19992.4	18224.4	40578.1	28160.2	18532.7	18545.2	28808.2	52278.2	58699	56520.8	53108.7	59265.7	67254.6	62715.3	39658.4	28764.3	36850.8
22415	15657.3	12253.7	10391.4	8208.44	8969.5	15311.3	22578.8	25064.2	11190.4	9516.91	11121.2	13574.8	14669.5	23755.8	58057.8	94694.2	61840.9	49880.2	38140.9	46556.1	31378.7	25152	19495.3	19400.9	21169.1	18388.1	17526	19589.6	32074.2	28669.7	21238.3	21672.6	33502.8	38348.7	29783.6	27920.9	30639.4	30010.1	30570.1	30431.6	26504.9	40816.2
31388.5	19520.6	14153.7	11020.5	9642.72	17155	22975	37851.6	33792.2	19470.6	8516.62	9152.12	12505.4	13046.3	13889.4	21760.5	27782.4	27725.8	21118.8	19099	20023.9	23133.7	19810	26391.7	20344.7	20741.2	21037	17739.8	21798.2	102471	84825.6	64536.1	34962.8	38883.6	44699.3	49451.6	37411	35277.4	36605.5	47387.3	42175.3	37606.2	39255.1
42817.7	30079.4	21464.8	16645.1	17003.7	19155.7	25473.4	28480.9	33225.7	26964.8	10045.4	9164.62	13052.6	20564.9	12719.2	11920.2	18589.3	21477.3	21678.7	13908.2	11637.1	23346.1	24453.6	23283.2	23566.3	25221.4	30903.7	34295.7	32665.8	104799	63862.8	49514.5	63465.2	76680.7	77745	71573.8	58560.4	50628.7	51044.1	56067.5	52479.4	49256.5	35611.1
39745.9	38720.1	73545.7	64535.7	43000	41502.3	23975.7	22509.2	20552.4	28613.1	17035.2	13430.1	14669.6	16953.5	13839	11599.4	19577.2	22131.7	20067.9	17268	22761.5	38063.3	30859.7	27127.9	26775.6	28550	31702.9	35239.7	38392.7	52202.3	47135.2	43144.6	43931.3	40620.8	45977.1	51944.6	48469.8	40897.6	40885.1	55671.1	60927.5	55928.9	43692.4
19709.5	40809.7	24636.2	20753.7	21471.1	16972.3	18463.6	25057.7	26341.5	30702.5	13279.1	14524.9	15022	21414.4	16827.7	15091	18822	20558.7	20470.6	28065.6	41023.6	40150	30777.8	25951.3	23327.4	26404.4	25567.3	27568.3	36630.6	52266.1	32061.6	36064.3	27190.9	29198.4	35031.9	58101.7	34295.8	28921.4	41420.1	56149.4	52901	50370.7	42792.2
14864.7	14115.9	20243.9	21483.7	17318.4	16198.3	19703.1	25108.1	23113.4	17670.8	10460.6	9296.81	8724.37	16739.5	17821.7	14776.4	19130.4	14455.6	21603.4	26882.6	37858.1	41615.9	25517	25007.3	25422.7	29242.3	28097.1	32489.5	56666.3	47652.1	33584.6	61204.9	40545.7	28254.3	53825	74403.6	39525.8	26530.2	50704.8	69577.9	64245.3	79479.3	115034
22465.6	19331.8	26486	22905.6	17903.4	12952	13996.5	16645.1	19357	20464.5	13209.9	11347.6	10781.4	12933.1	17249	15047	18174	19312.9	32533.9	40834.9	37971.1	40183.6	26530.1	22188.4	23402.7	31375.6	34289.3	35478.9	50030.8	47210.8	42515.2	40520.1	32766.4	38348.7	54147.8	44353.2	36913.9	22754.7	26819.9	39513.1	77676.5	103732	51071.3
21980.9	25573.8	31910.6	30142.2	29544.4	22050	17437.9	19224.7	20772.6	21924.2	15927.8	15166.5	13832.7	13342	15386.9	20747.4	26693.7	19979.9	24453.9	37203.2	36309.4	36217.2	35749.5	25548.8	17507.1	19564.5	23616.8	31854.1	43446.7	38959.3	30771.5	30035.2	31872.8	39746.2	59303.4	38556.6	26479.8	21817.2	15279.8	15820.9	24737	45543.2	33490.2
18847.3	22452.7	30853.2	32168.6	31174.4	31413.4	28273.1	26888.9	26719.2	19117.8	17091.8	28430.7	21622.2	11926.4	14896	15481.2	19652.5	13908.3	13964.9	33629	29160.7	25236.7	30583.1	38084.2	25164.7	16003.3	14052.9	15795.8	27467.8	23962.9	24120.1	27857.9	26341.4	36191.2	45662.2	45246.8	35151.6	26655.9	24642.4	21641.2	30136.2	17670.6	16878.1
13618.9	25492	34962.8	29852.8	26932.8	23390.2	23572.8	29305.2	27795	24944.4	29601.1	32816.8	18941.7	9561.03	11341.4	15632.3	9403.72	9636.44	8705.41	13719.6	25378.6	19375	21307.5	24076	32055.3	28525.1	21634.7	22389.8	38550	26026.7	27933.4	24831.1	22169.5	36952	34578.9	35749.5	33678.9	32319.6	36133.3	42955.8	27795	23792.9	18501.3
26580.7	25120.7	30557.6	25089.1	19677.8	19130.4	26417	30318.4	38996.9	36416.6	27719.4	19111.5	9208.75	10404	11958	12757	6736.28	13732.1	17098.2	22547	20898.4	15007.2	15078.6	15739	20313.4	26133.7	27297.8	33540.7	43894.1	23100.8	25322	20867	22987.5	34648.3	29305.6	17846.9	19891.7	23018.9	33263.6	24598.4	26391.7	24006.9	19885.5
26272.2	28600.5	26007.9	21106.2	18425.6	17909.9	21238.3	36246.7	45668.4	43113.2	31382	21376.8	9491.84	6163.75	6346.25	7541.62	8843.84	10819.2	20816.8	22157	23427.9	17300.1	13895.6	12989.7	21433.3	32225.1	32237.8	28789.3	29318	18438.3	24994.8	24743.1	34912.8	44291.5	43095.5	25240.2	55535.8	75888	49760.8	23402.8	15455.9	12618.5	10001.3
17519.6	26014.2	25051.5	23440.6	19866.6	20458.1	28254.4	40633.8	51642.2	42081	26480	26379.2	12526.4	8447.47	10366.2	12524.2	16833.8	19004.6	21754.2	25120.5	17343.5	13844	16626.3	20061.6	15323.8	18897.7	26618.4	36467.2	34208.1	18929.2	15909.1	19967.3	40287.3	27820.3	46386.2	35038.2	52506.5	66670.6	36914.1	21181.7	13732.2	11580.5	10756.3
16418.6	23793	19753.4	10768.9	18174.3	31205.8	52127.1	52416.6	47921.9	42439.7	31558.3	23635.8	24340.4	19419.8	18954.3	25989.1	30041.6	31293.9	27625.2	27304.2	21062.2	20471.3	24296.4	21911.6	23283.2	18696.3	19495.4	27292	28323.9	21559.2	19426.1	27984.4	41728.7	33421	43239.1	33364.2	54085.2	34679.9	27650.4	19150.3	12530.4	17198.7	18293.6
206
30525.1	37951.2	57911	55065.5	54744.8	45057	40613.5	40116.2	41267.9	45762	57860.8	47713.2	44918.4	65241.1	115867	61619.2	58704.2	52232.9	43722.7	52447.4	65069.3	79246.2	78190.9	103510	116791	124975	123406	105154	99283.6	57156.3	46939	49204.9	68500.8	81824.4	60076.8	55645.2	65636.2	90290.6	55821.3	65415.8	244467	114190	59284.9
47575.2	55902.9	66172.2	39102.9	27649.2	24257.5	25113.2	28221.9	59762.3	85785.8	99466.6	60883.3	46637	133919	108790	68821.4	65950.5	71472.5	94572.2	91832.2	102124	78776.5	76200.9	98112.1	105910	136318	131373	119298	137818	100784	59938.2	52069	81566.3	86799.4	71567	64414.3	78531.5	118525	84250.2	97780.9	179408	132394	37038.8
71417.7	79475.8	46826.2	33394.8	25773.9	33993	67266.5	68179.3	100955	140492	111966	73847.3	72538.3	114623	89891.8	92814.2	102502	95686.7	98401.5	88487.6	90560	71041.5	62387.1	82353.6	114227	146396	133143	115927	122423	101003	68091.4	64653.6	68909.8	103447	113275	108399	138575	149449	110624	122646	145054	132035	46530.1
86063.2	64786.4	38983.3	40663.7	32192.6	50514.7	90516	84110.9	115632	126733	113785	88525.5	125568	144814	136091	133816	128164	85200.6	75735.2	77158.1	85647.6	43207.2	57476.8	77498.6	105142	126966	128390	111492	121667	96292.2	55789.5	65667.2	77353.8	110176	161617	177377	178275	152998	145666	140162	116805	70740.5	40311.4
60183.6	49621	36944.2	48248.7	66183.2	80029.7	96442.9	70868	93263.2	121774	124540	123224	174352	126922	145892	145829	100173	71327.3	74784.4	88556.8	50527.6	52920.5	76113.1	91246.4	120773	120262	103818	89936.1	114604	103889	73254.8	61253.8	60070.2	110146	146580	185646	163955	121050	95957.4	107372	81907.7	50149.4	63942.7
67770.4	52000	64981.3	89016.5	99157.1	109873	112550	112922	101955	108828	153513	161764	138177	101520	103076	147235	127168	130306	110112	82297	92254	96192.3	93740.7	120269	157869	142129	132241	108273	110408	109722	93356.3	78839.6	77599.2	81095.7	115827	139930	121204	141763	100645	76723.5	60775.5	127452	371654
69961.2	63281	66340.8	77693.6	82599.2	57011.3	52635.8	66857.1	104809	107384	110585	150418	195243	165159	115555	113938	145868	160303	111417	96228.4	101589	90157	124049	157320	172799	158494	110629	100745	115594	161147	137165	87134	86522.4	112553	126406	136186	113401	174453	164406	104908	105407	153015	119283
91844.7	84488.4	60555.3	47184.4	47643.9	32859.9	40047.4	73267.9	106540	93797.5	80621.9	92134	99629.9	142432	172856	110991	88116.2	66145.8	64288.7	88519.4	131863	128947	107838	95510.4	119784	133596	116696	120432	136836	137212	115254	69608.9	80420.5	111146	148982	135298	108795	145772	146400	103403	67771.4	53914.2	77032.7
64565.6	71673.9	70873.9	63243.5	35874.4	40827.6	72624.9	99644.2	114668	67506.3	44163.4	41525.9	49677.2	50747.2	57729.7	108790	160450	114850	123905	114648	127741	95314.2	75596.6	64804.5	68298.8	67719.7	67058.4	78751.6	95591.7	114207	125611	83394.6	70918.5	86302.1	105180	92795.4	72996	65459.5	86749.3	60297.3	50999.1	48839.9	84630.3
66649.9	54429.8	67744.7	54203.7	38479.7	67538.9	101047	108292	87996.7	52781.3	31261.3	34389	42747.2	46441.9	41972.9	54322.7	67681.8	76742.7	67524.7	60108	58811.1	63977.9	60605.5	69124	55651.1	59308.6	59843.7	60649.5	63274.8	167938	164883	136678	86748.8	96424.1	114511	138000	107285	79022.3	98232.2	97916.8	71491.2	68909.8	80238.8
84010.2	69583.7	71610.7	47348.3	54650.4	80924	80640.6	76264.1	79532.3	59523.7	30921.5	31985.2	44597.5	58534.2	39732.5	40141.6	57457.9	65220.1	65226.3	46636.9	43326.1	63155.3	70590.6	67530.7	64206.5	76926	88116.1	91472.8	86906.8	182940	127788	108821	126086	147694	155116	172174	149619	108607	107750	132682	89608.6	82000.9	64030.4
75357.4	101085	132834	115060	99447.1	111499	75596.6	70263.4	61940.1	62261.2	44849.3	43590.6	41129.6	46769	54524.1	52629.4	72429.4	80640.7	62651.6	50665.3	59278.4	78792.6	85590.2	89262.2	91328.1	93935.4	98155.6	106439	122524	141221	122675	123608	132795	127603	127124	123224	135708	101010	86239.3	129503	122868	90376.6	75439.5
51345.5	77473.3	61908.9	60120.8	68475.2	62947.4	64112.5	75137	64735.5	74872.7	48707.7	50483	60492.9	77920.1	66510.9	56544.9	59528.8	70874.1	76213.9	87921.4	119620	94977.6	79960.5	72536.4	64168.8	69935.9	65497.3	70785.9	86882	113258	81314.5	87391.7	74425.3	80382.7	94540.1	127213	93834.9	78720	85401.6	115890	130609	84671.2	66812.9
44987.8	51867.7	56419.1	61625.3	54398.4	50866.8	54014.6	62701.8	62450.2	73210.4	52793	46523.6	48581.9	58162.8	52025.2	39870.7	45648.7	37699.4	59700.4	83247.7	107820	101052	68123	63073.2	59849.9	61757.4	61134.2	70855.5	104085	92564.1	66945.3	107165	79721.8	60687.4	95196.1	130593	82039.3	59239.2	91946	124862	108400	115090	163292
53758.4	59617.8	82926.4	64332.4	54732	41047.8	39247.9	48317.4	67015.5	78380.2	54480.1	44491.1	31682.9	35591.2	50061.1	48172.8	60806.9	56135.7	78003	90610.2	84274.1	82733.5	60995.6	56746.4	72876.7	88821.3	94735.2	99654.9	122744	115014	104619	86213.9	81144.4	92757.9	118127	105885	100310	70408.2	70345.4	78971.8	127440	153623	78825.6
60782.8	66499.5	99509.8	94609.2	92190.9	66297.4	49186.2	66365.8	73248.2	67707.7	45894.2	44276.6	52994.4	57652.8	58420.9	51704	55650.9	45271.2	58566.3	92172.1	98432.9	88757.2	88789.8	75975.5	57621.3	63413.2	66573.8	72989.6	84589.2	78436.4	67430	65944.3	85508.6	96934.5	129310	96405.4	80237.6	69942.6	49979.3	39115.5	47612.8	71920.1	62997.8
56734.2	56526.5	94722.9	105381	105494	103661	91907.4	86421.7	68859.8	49374.9	48928.1	88122.9	69088	27479.4	24698	24767.3	30669.8	23521.3	23533.8	49596	47870.9	41293.8	50407.9	60655.8	48179.1	35704.3	27397.5	26151.8	45227.2	38051.8	41639.3	44987.8	42382.1	52983.2	69130	66580	55122.2	41223.9	38366.5	35924.5	46750.7	31777.3	33954.9
35521.8	59441.7	84891.6	78581.3	77089.1	76289.3	81428.7	78726.3	62185.6	57212.2	82297.2	83462	38694.5	19142	19198.7	24691.7	17417.9	16813.9	14920.1	22564.9	38272	33187.8	37768.6	41375	53347.1	48531.6	35125.3	36031.7	59938.2	45768.4	49173.6	44308	36887.4	57937.4	54983.7	59547.8	53737.3	53611.4	58754.5	65597.9	47518.4	41632.9	38480
65654.7	58886.8	68663.9	59623.3	47845.4	50507.9	69105	66202.5	83040	98692	75125.7	36975.9	19714.6	20758.9	22187.2	21853.9	15140.3	25144.9	34112.3	38353.9	34332.4	26475.2	27875.8	32482.2	44251.4	50564.5	49790.4	54738.4	71819.3	45604.6	52314.6	43464.6	40947	57936.5	51754.6	36931.6	40846.2	43420.5	56696	38228.2	43502.4	44578.7	43250.6
41841.2	77605.6	71434.5	64937	47429.8	41614.1	49211.4	72347.9	102225	103013	59019.8	37422.6	20633.2	17248.1	19192.2	19695.5	21910.5	26202	41544.9	41909.9	41853.3	35391.9	30764.1	31852.9	44289.5	66170.9	65006.1	60171	55764.4	37762.3	48984.9	46435.4	57993.2	70661.5	71550.4	46498.5	90270	125034	85668.5	43842.4	32356.4	27712.2	22873.2
28794.4	51327.5	64911.7	66763.1	69696.7	52837.1	58987.5	94801.3	120401	83740.4	43578.3	46504.8	27051.5	26006.8	33105.1	35924.8	47606.2	45189.1	47511.8	49979.5	33564.6	26475.3	34288.6	42640	35698	38807.2	48770.8	64295.1	64648.9	36730.3	32765.5	38524.3	64962.2	51452.2	78002	60655.7	84492.9	109768	66631.2	45208.1	32796.9	26384.4	22401.2
26818.6	36277.1	33130.7	18626.1	54517.6	83909.1	102245	118726	89893	70420.6	57741.7	42508	49022.5	43294.9	37353.3	55531.8	69715.4	67184.6	58313.9	58062.2	47096.8	38709.2	48789.8	42167.9	44704.5	38284.7	42854	55456.1	56218.9	41658.5	41437.8	53423.6	70345.3	59629.7	74942.1	65604.8	92281.6	65698.9	57417	33948.7	28328.9	38435.8	37642.7

## Sheet: BH14 - Image 2
BH14 - Image 2		WC1 Correction factor: 0.72484
238
75415.1	23717	17720.3	22823.1	20551.7	22388.1	21596.3	20444.7	16606.6	13530	11787.4	7119.23	4804.23	39586.6	74160.5	29493.5	16632	234635	179377	34665.5	73090.6	787573	1.51228e+06	2.21992e+06	2.29069e+06	2.21282e+06	1.75958e+06	1.93872e+06	2.84457e+06	2.60975e+06	2.27975e+06	1.41411e+06	1.06021e+06	787702	1.40263e+06	1.81678e+06	1.69439e+06	3.00435e+06	2.30957e+06	1.37995e+06
28096.4	23666.3	27190.1	21439	15581	17965.7	14756.8	7987.42	6943.04	10778.6	12341	10912.7	9692.36	59746.1	218358	66164.4	23345.5	28708.5	119483	253388	212237	685950	1.36289e+06	2.39255e+06	2.10824e+06	2.39014e+06	3.05867e+06	2.98241e+06	3.44633e+06	2.85251e+06	2.50487e+06	1.40117e+06	839188	812195	1.00058e+06	1.56206e+06	2.12263e+06	1.68746e+06	2.29068e+06	1.99332e+06
22634.4	25667.4	23005.7	20495.1	23075	13219.9	10333.9	8830.36	9547.7	11258.7	26870.5	21476.8	26473.5	365585	733221	330489	201964	434964	415390	1.13735e+06	1.00271e+06	1.38525e+06	1.45819e+06	1.76814e+06	1.81197e+06	2.99942e+06	3.56068e+06	3.37568e+06	2.66266e+06	2.15259e+06	1.74573e+06	926830	704236	451299	859005	1.5454e+06	1.8491e+06	1.28424e+06	989966	1.46262e+06
18167	18368.3	20658.5	15486.6	13599.2	13162.3	14945.6	14203.1	15241.3	14178	14731.6	23251	37863.7	263654	1.11558e+06	1.31999e+06	284165	283112	693932	994885	1.40049e+06	1.51953e+06	1.64484e+06	1.94822e+06	2.55417e+06	3.07612e+06	3.21674e+06	2.80609e+06	2.66373e+06	2.1597e+06	1.63765e+06	1.35134e+06	633276	536232	934551	1.63031e+06	1.83032e+06	1.02213e+06	773412	1.23314e+06
26271.5	19865.9	12951.2	16204	21457.8	18878.9	15782.4	13378.9	14788.2	18639	29575.2	40632.8	157350	414113	831783	681424	176535	249839	1.18519e+06	845477	1.04149e+06	1.13257e+06	1.32022e+06	1.50601e+06	2.7694e+06	3.41233e+06	3.41099e+06	2.90747e+06	2.37193e+06	1.52152e+06	1.55417e+06	1.3345e+06	669469	1.58955e+06	2.0626e+06	1.40354e+06	1.49289e+06	755223	673378	1.03931e+06
21250.1	22345	26026.2	31846.9	28952.2	21913.6	18500.5	31847	39178.8	47946.5	56683.9	55645.3	60524.1	62287.1	45675	174323	205129	179983	716669	801021	1.08868e+06	1.48032e+06	1.73739e+06	2.16924e+06	2.80277e+06	3.01851e+06	3.06847e+06	1.75945e+06	1.67578e+06	1.80694e+06	1.35813e+06	1.06549e+06	568275	2.32702e+06	2.66404e+06	1.94932e+06	2.64685e+06	893992	829800	1.0951e+06
49388	121060	81445.1	35100.7	21325.7	17066.6	27970.6	36157.9	39934.1	41753	41476.2	43798.6	38046	86672.9	78092.5	103173	169628	240611	354687	506560	1.08606e+06	1.83837e+06	2.36123e+06	2.54037e+06	2.64225e+06	2.25762e+06	1.59489e+06	1.23394e+06	1.59539e+06	1.66695e+06	1.33307e+06	975283	760109	2567881	3.42316e+06	2.89127e+06	4.36462e+06	1.61065e+06	799493	951229
43213.3	71246.9	90566.4	77486.5	50986.9	49388.9	47386.3	47059.1	45548.2	43282.5	41224.3	42772.6	140772	485297	189581	72835.5	322872	585808	550237	642690	871213	1.43887e+06	2.47639e+06	2.97748e+06	2.51201e+06	2.39252e+06	1.84203e+06	1.156e+06	1.42429e+06	1.42898e+06	1.06987e+06	885238	727418	2.79095e+06	4.71734e+06	4.87173e+06	6.5233e+06	3.08367e+06	1.25751e+06	1.71566e+06
82174.3	401742	392907	266697	103020	95566.3	75672.8	65579.4	71549.5	60215.8	49325	39456	411572	1.0692e+06	657979	734587	1.18755e+06	1.24638e+06	911077	857076	1.12002e+06	779918	1.82567e+06	2.75621e+06	2.71092e+06	2.36274e+06	1.34811e+06	782604	882733	911859	1.7983e+06	3.64265e+06	4.64254e+06	5874657	5.86459e+06	4.34642e+06	6079928	4.40572e+06	1.30684e+06	1.53828e+06
179532	1.04987e+06	1.75288e+06	1.1114e+06	750246	760272	696056	623109	560471	268190	218556	598237	1.37854e+06	1.3925e+06	1.6839e+06	1.69209e+06	1.62449e+06	1.4188e+06	1.40903e+06	1.28137e+06	1.36838e+06	1.50665e+06	2.35151e+06	2696113	2.39876e+06	1.62597e+06	1.15221e+06	2.91336e+06	4581984	6021426	6748572	7004338	7729210	8.10822e+06	4890333	3.34776e+06	4.31768e+06	5795472	1.39698e+06	1.0918e+06
343013	1.25221e+06	1.77965e+06	1.62477e+06	1.78454e+06	2435250	2.1634e+06	1.96703e+06	1.34356e+06	1.33889e+06	1.87688e+06	2.06522e+06	2.12555e+06	1.92295e+06	1.58605e+06	1.29032e+06	1.28785e+06	940176	1.17864e+06	1.57872e+06	2.09911e+06	2.18953e+06	2.64017e+06	1.88413e+06	1.35135e+06	985849	3077750	5719370	5.73476e+06	8.17285e+06	6.59293e+06	4.05595e+06	3.84641e+06	3.13992e+06	2.50118e+06	2.61417e+06	2.86855e+06	5938752	2.46946e+06	1.14569e+06
922499	1.54338e+06	1.23933e+06	1.61043e+06	1.75645e+06	1678081	2.26082e+06	1.99091e+06	1.56516e+06	1.28588e+06	1.41923e+06	2.0382e+06	2.51331e+06	1.89036e+06	1.71221e+06	1.71889e+06	1.82591e+06	2.19407e+06	2.76105e+06	3.16864e+06	3.50642e+06	2.66568e+06	2.88939e+06	1.71083e+06	894385	1.59411e+06	4464062	4.03959e+06	3.15232e+06	4078576	3.22961e+06	2.49546e+06	2.67614e+06	3149010	3.47289e+06	3.13489e+06	2.64454e+06	5439089	4541086	1.17264e+06
1.64182e+06	1.74597e+06	1.36983e+06	1.7149e+06	1.84373e+06	1.57892e+06	2.47455e+06	1.50626e+06	1.23026e+06	1.22544e+06	1.02816e+06	1.38427e+06	2.33291e+06	2.19068e+06	1.9128e+06	2.9394e+06	3.07618e+06	3.02272e+06	3.31912e+06	3.00349e+06	2.69421e+06	3.11033e+06	2.52715e+06	1.56737e+06	939328	3.51885e+06	5.14662e+06	6955644	4.31083e+06	3.58853e+06	3.80094e+06	4.37606e+06	5.38189e+06	5.24267e+06	6.33911e+06	6606917	4.08102e+06	4.37905e+06	7.39313e+06	1.99074e+06
2.08411e+06	1.81408e+06	1.98096e+06	1.57448e+06	2.26063e+06	2.18143e+06	1.82105e+06	1.61082e+06	1.56818e+06	1.66422e+06	1.56158e+06	1.38917e+06	1.38676e+06	1.71352e+06	2.45514e+06	3.25208e+06	2.91874e+06	2.45405e+06	2.67413e+06	3269681	3.19158e+06	2.82252e+06	1.91835e+06	1.12509e+06	3.5148e+06	2.42322e+06	1.19978e+06	5107333	7.22389e+06	4.21427e+06	4081063	6.26786e+06	6310106	4281567	5038019	6200032	4732760	3.12049e+06	7802545	4.16036e+06
1.58418e+06	1.5388e+06	1.33999e+06	1.14158e+06	1.35836e+06	1.70125e+06	2.15411e+06	2.54289e+06	2.96408e+06	2.39556e+06	2.35841e+06	2.37623e+06	2.45345e+06	2.19774e+06	2.74677e+06	2.78712e+06	2.44822e+06	1.91167e+06	2.17759e+06	2.82125e+06	2.35496e+06	1.70503e+06	1.32524e+06	813293	933679	1.64594e+06	1.24356e+06	1.04546e+06	5588558	6.32747e+06	4.35751e+06	4937387	4.18035e+06	7.69468e+06	7692705	5371680	6009344	3506684	5.11002e+06	7.0437e+06
1.88212e+06	1.95408e+06	1.49652e+06	1.33146e+06	1.65456e+06	2.11607e+06	2.36613e+06	1.79756e+06	1.86484e+06	2.35357e+06	2.27278e+06	1.73525e+06	1.77942e+06	2.30293e+06	3.07197e+06	2.60457e+06	2.21382e+06	2.203e+06	1.99868e+06	1.63254e+06	1.25044e+06	1.31663e+06	1.18889e+06	891383	1.88289e+06	2.85202e+06	2.16411e+06	1.38725e+06	1.13198e+06	5678347	7068410	3.65107e+06	4121940	4772557	8.16878e+06	4857919	5946599	3872366	3.18423e+06	7.47837e+06
1.78102e+06	1.64865e+06	1.11314e+06	1.5367e+06	2.83508e+06	2.16924e+06	2.18706e+06	2.34959e+06	2.87825e+06	2.74997e+06	2.52862e+06	2.36655e+06	2.07438e+06	2.87902e+06	3.04313e+06	2.35416e+06	1.98186e+06	2.03729e+06	2.04718e+06	1.90236e+06	1.3855e+06	913774	685649	905912	1.81879e+06	2.53011e+06	3.10548e+06	2.04107e+06	1.32933e+06	1.8246e+06	7953045	5400980	3031149	1.7719e+06	3.82155e+06	3.35689e+06	4520886	4.42225e+06	2.66793e+06	3817512
2.44628e+06	2.24091e+06	1.67549e+06	2.08749e+06	2.4827e+06	1.89224e+06	1.98877e+06	2.54146e+06	3.0709e+06	2.71538e+06	2.37355e+06	2.33985e+06	2.88778e+06	3.06165e+06	2.27891e+06	2.12422e+06	2.42772e+06	2.40009e+06	2.26302e+06	2.22493e+06	1.5914e+06	1.12735e+06	1.08069e+06	1.1616e+06	2.25861e+06	2.32606e+06	2.46461e+06	3.17114e+06	2.1096e+06	1.27948e+06	5624068	6.5565e+06	2.365e+06	1.45509e+06	2.92324e+06	4.01519e+06	3.15454e+06	4643187	2.90768e+06	2.75239e+06
2.0279e+06	2.63622e+06	2.79982e+06	3.19022e+06	3.12419e+06	2.62162e+06	2.66783e+06	3.56124e+06	3.08059e+06	2.58627e+06	1.7952e+06	1.8681e+06	2.46598e+06	2.6339e+06	3.09449e+06	3.46499e+06	2.98211e+06	2.60988e+06	2.71587e+06	2442033	2.45084e+06	1.79803e+06	1.34987e+06	1.67605e+06	2.63591e+06	3.02874e+06	2.39465e+06	2.41101e+06	1.84256e+06	1.17451e+06	4738188	5776028	1.65986e+06	1.86827e+06	4.41371e+06	3.95983e+06	2.5395e+06	4005273	4434964	4410644
2.96479e+06	3.48719e+06	3.43361e+06	3.39231e+06	4159260	3779624	3.54776e+06	3.22554e+06	2.93528e+06	2.37646e+06	1.90686e+06	2.01784e+06	1.95383e+06	2.46109e+06	3.09058e+06	3.11167e+06	3.38432e+06	2.59127e+06	2.53105e+06	2770833	2.3471e+06	1.84004e+06	1.83232e+06	2.11005e+06	2.51286e+06	2.94761e+06	2.77004e+06	2.36016e+06	1.85607e+06	1.18621e+06	3.38498e+06	5.75988e+06	10286384	8058206	4.90319e+06	3887158	2.20934e+06	2.69454e+06	4123260	4.91095e+06
3.38672e+06	3.83262e+06	3737220	3.19548e+06	3.00813e+06	3.43174e+06	3.47476e+06	2.68585e+06	2.87406e+06	2.95392e+06	2.49129e+06	1.94019e+06	2.03511e+06	2.12923e+06	3132423	4.40717e+06	3.7501e+06	3.03856e+06	3.29095e+06	2.88706e+06	2.52394e+06	2.41082e+06	2.31503e+06	2.6804e+06	2.74376e+06	2.80784e+06	3.00781e+06	2.93304e+06	2.14281e+06	1.34852e+06	2.60854e+06	4.13105e+06	5900845	6.38398e+06	4.14367e+06	3.10135e+06	3.39861e+06	3.01847e+06	3.22744e+06	5533587
4.14476e+06	2.93922e+06	2.19915e+06	2.28947e+06	2.43496e+06	3.06881e+06	3.2917e+06	2.8312e+06	2.48483e+06	2.63313e+06	2.81145e+06	2.18561e+06	2.28298e+06	2.15178e+06	1.93094e+06	2.45147e+06	3.40676e+06	3.18168e+06	2.73835e+06	2.87504e+06	2.87893e+06	3.21275e+06	3.05193e+06	3.24718e+06	2.82282e+06	2.36272e+06	3.12616e+06	2.61425e+06	1.61938e+06	926282	2.35312e+06	4.3168e+06	4043457	3.23036e+06	2.7738e+06	2.8628e+06	3.43902e+06	2.37228e+06	2.51798e+06	5943998
3.02317e+06	1.8757e+06	864058	1.14841e+06	1.9725e+06	2.54385e+06	2.78959e+06	3.38279e+06	3.12415e+06	2.924e+06	2.93043e+06	2.57088e+06	2.20417e+06	2.13555e+06	2.26004e+06	2.29523e+06	3.05433e+06	2.86261e+06	1.54033e+06	1392594	1.61512e+06	2.96945e+06	3.86642e+06	3.03906e+06	1.42972e+06	1.67287e+06	2.93145e+06	2.19198e+06	1.16462e+06	553746	3317716	4765860	4343458	2237225	2.05562e+06	2.41659e+06	4.80638e+06	4.36104e+06	2.79631e+06	2.12973e+06
3.10406e+06	1.58285e+06	663445	551298	317092	711052	1.33895e+06	2.07101e+06	2.51302e+06	2.69108e+06	2.96414e+06	3.39833e+06	3.54279e+06	2.50405e+06	2.63286e+06	2.80527e+06	3.12788e+06	3.57887e+06	1.46301e+06	858507	613877	1.25181e+06	2.60302e+06	3020475	1.69956e+06	1.54709e+06	2.89392e+06	3.10107e+06	1.87749e+06	3751727	4782201	3.47665e+06	2.19839e+06	2.36206e+06	2.66686e+06	3.36607e+06	4163524	6.11863e+06	4693801	4215760
3.27521e+06	1.15601e+06	289093	164339	165271	231657	372195	736736	1.03549e+06	1.24416e+06	2.05731e+06	2.60176e+06	2.6254e+06	2.44185e+06	2.83633e+06	2.47528e+06	2.68078e+06	3.61641e+06	2.64141e+06	679803	442708	332294	645863	2.17845e+06	2.39715e+06	1.82798e+06	3.1731e+06	3.09617e+06	2.07107e+06	2.12269e+06	2.3283e+06	1.93285e+06	2.36651e+06	2267200	2.94808e+06	3.87857e+06	4490581	4736182	6420144	4402909
235
683.119	211.84	163.338	165.431	221.973	328.257	209.4	107.3	124.05	30.619	155.456	94.738	62.025	224.644	616.035	307.921	144.767	1519.74	1255.34	340.305	444.213	5520.43	10653.9	15297	16114.8	15718.5	12616.8	13743	20871.7	18719.8	16360.2	10308	7948.77	5511.36	10446.2	13900.2	12258.2	21727.2	16366.6	9880.09
364.452	209.663	255.619	128.542	146.902	113.657	127.713	124.113	47.106	88.981	101.323	66.254	99.188	379.433	1748.21	655.879	224.025	211.494	1056.37	1765.9	1364.46	4891.4	9842.37	16643.5	14831.3	17593.4	22048.2	21091.8	24703.6	20670.2	18562.3	10314.3	6225.06	6021.9	6898.09	10911.9	15655.6	12428	16184.1	14617.5
207.275	228.213	211.504	148.913	255.473	182.545	88.981	97.135	76.419	69.875	191.123	178.34	209.4	2349.96	5338.02	2758.87	1368.71	3230.65	2758.87	8121.29	6879.31	10320.5	9823.49	13239.6	12824.5	21444.2	24206.5	24426.7	18952.4	15787.7	12780.3	6772.27	5463.9	3649.44	6728.4	11396.3	13623.5	9848.65	7105.71	10685.4
125.881	87.931	213.556	82.175	105.794	146.557	70.442	113.581	168.019	120.125	38.994	79.85	207.904	1821.71	8055.77	9427.15	2016.62	2257.71	5212.18	6733.65	10295.4	10660.1	11585	14340.7	18084.2	21947.6	23061.2	20462.6	18952.6	15863.2	11452.9	9257.21	4507.65	3994.58	6791.31	11132.1	12818	7690.81	5495.31	8949.06
320.442	306.121	84.269	121.431	169.933	206.379	186.642	110.963	98.663	163.915	199.204	301.608	1142.31	2847.09	6117.99	4652.31	1475.61	1871.93	8401.65	6460.44	7294.4	8225.49	9735.43	10710.6	19619.5	24754	23879.2	21255.4	17171.9	10855.1	11817.9	9760.59	4878.84	10041.2	15265.7	10295.3	12207.8	5463.9	4646.06	7143.46
187.513	146.556	240.848	322.556	161.213	234.829	124.05	238.785	268.067	412.754	368.713	282.785	521.702	548.89	546.942	1242.93	1517.63	1205.16	5470.18	5338.9	8206.68	10321.1	11968.8	16347.6	20651.3	21733.6	22463.6	12440.6	11195	13510.2	9703.9	7873.21	4142.65	15973	19493.7	13982	19172.7	7130.9	6130.59	7929.9
293.265	1043.72	599.265	217.89	203.119	139.426	264.152	343.504	305.744	320.442	408.535	341.462	358.192	559.337	616.025	720.775	1557.53	1664.4	2651.96	3174.83	7678.21	13000.5	17115.2	18895.8	18990.2	15838	11540.9	9389.34	11207.5	11692	9968.24	7105.77	5205.96	18662.3	25106.3	20261.2	32613.7	11729.9	5419.77	6910.74
410.515	628.587	746.067	486.056	412.796	376.162	450.358	418.973	362.421	425.317	372.785	372.785	873.869	3775.87	1618.24	611.785	2182.34	4029.56	4130.15	4950.65	6463.99	10351.9	17763.4	21544.9	18832.9	16951.7	14076.5	8886.09	10490.4	10528.1	8036.81	6029.93	5180.77	20151.2	34325.3	36396	49305.4	23112.7	9037.12	12591.6
666.369	2752.59	2821.78	2117.21	672.588	785.888	419.004	582.379	525.879	400.119	463.015	429.442	2721.12	7961.31	4811.65	5602.31	8426.77	9143.93	7074.31	6165.72	8420.52	5577.12	12591.6	20229.9	19953	17587.2	10087.7	6048.87	6275.37	6961.06	13101.4	25836.3	34180.6	45165.2	44458.4	32047.2	44295.5	32961.4	9181.77	10817.5
1276.56	7049.21	12893.5	8521.24	5388.31	5619.15	4658.62	4469.87	4151.17	1976.74	1750.28	4161.59	10245	9986.99	12050.5	12050.5	11868.1	9924.06	10037.5	8667.65	10251.4	10968.5	17366.9	18172.2	16687.5	11339.5	8603.06	20223.6	32632.8	44924.2	50771.7	52093.4	57016.4	60812.6	36817.7	24810.5	30556.4	43792	10238.7	8030.65
2438.06	9200.62	12988	12226.7	12830.7	16584	15825.5	14466.5	9395.71	9697.68	13101.3	15114.5	15812.8	13667.5	11578.7	9464.93	9659.87	7149.77	8640.74	10918.2	15196.3	15435.4	18927.2	13824.7	9986.96	7023.96	22489.7	42840.8	40701.2	60585.7	49085	29064.4	26811.5	22480.5	18367.3	18644.2	20984.9	43136.9	19626.4	8697.31
6514.46	11471.7	8659.62	11610.2	11962.4	11716.1	15945.1	14240	10848.9	9030.77	10396	14045	17933.3	14120.5	12648.2	12063.2	12686	15416.5	20072.4	22042	25666.4	18971.4	20670.2	12352.6	6193.62	11648.6	32997.4	29221.9	22388	28227.3	23061.3	16945.4	18927.3	22588.4	24930.2	23130.6	19619.4	39814.7	34446.6	8445.65
11194.9	12900	9974.37	12553.9	13359.1	11522	16983.2	11264.1	9471.18	9370.49	7414.02	9552.99	17631.2	15831.7	14428.7	21192.5	22268.5	20802.4	23401.1	21552.9	19839.8	22048.2	18606.5	11792.6	6703.09	25094.1	37937.8	52181.7	32154.4	25527.9	25597.1	32273.8	40266.5	40180.2	48581.1	48379.7	28857	29700.7	55241.7	14850.5
14542.1	13201.9	13409.5	11987.5	16064.5	15757.2	13189.4	12472.2	11195	11433.9	11333.4	9678.9	10647.6	12277.1	17222.2	24124.7	20833.8	18065.2	18983.9	23091.9	23149.4	19726.5	13717.7	8659.59	24854.8	18612.9	8766.59	37756.5	54485.8	30467.9	29372.7	46384.5	48229.3	30923.5	38082.6	45553.5	34483.1	22476.2	56318.2	32162.2
11075.4	11062.8	9628.52	8407.99	9760.49	12313	15359.8	18530.9	20349.3	17310.3	17002	17127.8	17952.1	16152.6	20399.7	20317.9	17215.9	14353.1	15278.1	19963.8	17077.5	12591.6	9685.06	6294.21	6822.59	12295.8	8999.4	7149.81	41431.6	46863	31109.7	36339.5	29158.8	57849.2	59818	40203.7	44640.9	26484.5	35264.2	50520.9
14623.7	13346.5	10603.6	9571.84	11452.9	15642	16737.7	13472.4	13805.8	17272.5	16083.5	12333.6	12641.9	15661.9	22255.9	18184.8	16196.6	15133.4	15221.5	11838.5	8816.96	9590.71	8458.21	6193.46	12893.7	20349.3	16014.2	10043.6	8766.52	41098.4	52452.5	27661.4	30184.8	34082.1	61989.7	35389.2	43369.4	28561.1	22790.8	54800.9
12522.4	11541	8458.43	10509.2	19323.7	16303.6	15712.1	17039.7	20657.7	18291.7	17851.4	16668.6	15322.1	20198.3	22255.9	16706.3	14504.1	15466.8	14667.7	13722.3	10263.9	6979.93	5243.62	6350.81	13289.9	18222.6	22557.9	14636.3	9301.31	12182.9	59970.1	41399.7	23150.1	12960	28605.2	23394.7	32286.8	33136.2	18675.6	28001
17656.4	15762.4	12786.7	14233.7	18228.8	13032	14730.6	17952	21840.5	19191.6	16775.5	17090	20122.8	21695.9	16140	15347.3	17448.7	17241.2	16498.6	16375.5	11540.9	8156.27	7458.06	8716.31	17052.4	17190.7	17467.7	22998.4	15825.4	9232.09	41388.8	49337.2	16630.8	10040.9	20664.3	29354.1	22904.1	33821.8	21236.7	19770.5
14353.2	18316.9	19827.1	22709	22350.3	18590.3	19374	24628.1	22885.1	18373.6	13038.3	12792.9	17649.9	19883.7	21639.2	24602.8	22023.1	18556.1	18877.1	17554.7	17480.2	13157.8	9773.15	11899.7	18782.6	21450.5	16838.4	17574.6	12780.3	8823.18	33056.6	42577	12824.5	13219	32853	29542.7	19015.5	28730.9	31738.9	33217.8
20437.5	24823.1	24540	24049.2	29951.7	26896	25395.8	23873	20815	17222.2	13969.4	15234.1	14598.6	17480.2	21853.2	21872.1	23721.9	19770.5	18008.7	19503.5	16788	13044.6	13157.8	14730.6	17807.3	20959.8	20739.5	17001.9	13315.1	8873.59	23365	43816.6	76559.2	60719.5	36591.1	29693.9	15995.4	19462.2	29486	36408.6
24263.2	27529	27459.7	22929.2	21972.7	24638	24426.7	18782.7	20349.3	20890.4	18247.8	13831.1	14353.2	15007.5	22948.2	31499.7	26232.7	22073.4	23615.1	21373.2	18008.7	17297.7	16593.1	19487.3	19846	19776.7	21934.9	21356.1	15781.3	9760.59	17707.6	30851.7	43665.6	46884.5	31260.8	22111.1	23608.8	22677.3	24143.7	41701.6
29259.5	20966.1	15951.3	16366.5	17599.8	22466.2	24036.6	19732.7	17687.9	19097.2	20789.7	15756.3	16165.1	15378.7	14195.9	17071.2	23942.2	22834.8	19292.3	20251.3	20538.1	23885.6	20965.9	23432.5	20104	16442.1	23438.8	18549.8	12415.5	7067.99	16292.1	31896.4	28454.1	23357.9	20450	20852.7	24426.7	16341.5	18260.3	45094.5
21934.9	13648.8	5847.65	8169.02	14510.6	17346.3	20512.9	23212.3	22186.7	20538.2	21186.2	18713.4	15913.6	16052	16542.7	16895	21777.7	20022.2	12012.8	9839.69	11541.1	20437.4	27208	20651.4	10515.5	11855.6	21312	16001.6	8150.12	4073.49	24019	33935.3	32500.7	15807.5	15680.7	17140.4	36572.8	32368.4	20758.2	15838
22973.3	11767.6	4602.06	4155.31	2104.71	5461.15	9943.02	14743.3	17668.9	19927.8	20462.6	24212.9	24892.3	17392.1	18631.7	20437.5	22035.7	26000	10867.9	6216.01	4469.87	8848.34	18575	21463.1	11666.9	11163.5	21016.3	23055	13736.7	26258.8	36119.7	24539.9	16008	17159.3	18449.2	24439.3	30310.6	44263.2	34778.8	30876.8
24489.7	8559.06	2004.03	1320.5	1425.31	1686.97	2746.34	5287.59	7715.93	8735.12	14655.3	18291.8	18713.4	17713	20739.4	17889.1	19141.2	26503.3	19632.3	5231.08	3387.87	2268.15	5004.62	15177.5	17253.6	12793	22721.6	22796.9	14900.5	15403.8	16467.1	14655.4	17083.8	16641.5	21149	27988.4	34243.7	33815.7	47945.4	32960
232
35737.4	19897.9	15896	26907.4	30387.4	32125.9	33257	50748.5	72222.1	71787.9	86271.5	65366.8	29267.5	16412.1	32300.4	37750.6	33961.9	41904.7	59246.1	35622.1	38386.9	113269	67167.2	38455.6	59595.8	103770	286670	373330	137866	68639.8	52688.1	17343.3	9931.88	11789.6	32426.5	65658.6	124298	145656	213361	138942
24478.7	17783.7	12593	18375.2	41577.8	69289.7	73147.9	60700.6	56684.4	67808.8	69854.9	57452.5	31331.6	22024.6	31098.6	23515.8	31086	39167.2	90762.4	75536.7	92251.3	390934	183549	125522	215419	201910	190444	181521	115664	70377.9	40633.9	17550.9	9661.41	50881.1	261468	82175.4	115940	87838.2	125174	80642.8
14707.1	20967.4	17645.3	16858.8	16380.5	18800.2	20325.6	13801	15789.3	29172.8	42251.9	37020.5	26360.1	35352.7	43144.5	39172.9	43692.1	91546.2	153993	133165	221395	616638	464419	251244	312616	212439	118443	86291	56282	27222.4	14568.6	9592.16	15304.8	34550.5	267760	65162.9	34043.9	301442	221224	82314.1
20338.2	22276.2	23761.2	21175	16066	14112.1	10057.8	8610.69	12316.3	14732.2	16305	19526.5	20545.9	48765.4	34641.8	34988.1	45466.9	97207	209447	250353	272395	573685	964679	689711	243047	136214	77179	49256.5	31224.4	19841.1	12568	10485.6	43152.7	59418.8	60149.4	20363.5	19117.8	84787.3	43102.8	29771
24755.4	23975.2	18375.1	14656.7	9516.72	5915.59	5396.12	5874.22	10101.8	14065.3	14461.6	13970.9	25951.4	56099.8	77399.1	64660.7	70245.2	61048.7	128769	181447	203643	686156	775254	1.42168e+06	317191	107181	49357.4	31784.5	25718.3	19268.6	14807.6	10240.2	29643.4	31011.8	48107.1	30751.2	14801.8	37131.3	12014.4	17928.7
20055	16839.8	15675.9	15386.5	10705.7	8712.27	7132.38	5610.03	4446.19	5742	8478.69	11378.9	20873.2	38008.6	49029.6	65416.1	55639.2	77576.1	167202	242609	361054	774619	515647	765207	225104	107345	37612.5	21458.2	22020.9	16619.7	11360.1	7270.75	5981.19	6217.48	10781.2	6673.22	6779.97	6295.66	5704.34	32353.5
16802.1	20369.7	20646.6	12379.2	9491.5	7454.12	7522.41	6842.97	5930.84	10315.6	11303.3	12221.8	22647.6	31696.3	37832.4	49521	106597	151862	206564	206464	335406	407026	238736	141218	73182.4	27807.6	14027.6	8453.41	6207.66	6302.03	5308.06	7133.84	4829.84	4693.27	4031.06	4779.56	4546.81	5981.12	4936.84	8227.09
24629.6	32640.2	19558	13260	7918.72	5232.62	4439.94	5440.16	5345.72	14021.2	15103.2	14235.2	38166.7	55016.4	40872.2	60349.1	103121	145900	158178	245316	340563	253532	151727	102600	48048.6	24434.6	11139.8	6006.28	5949.62	12979.8	11322.4	5773.56	5005.97	4448.8	5050.16	4943.16	4943.12	4465.12	4760.78	6912.22
52707.7	81657.2	48066.6	34736.6	12951.7	10761.4	8422.03	7327.38	12077.3	15864.8	14059.1	16607.1	36303.3	103070	166458	159441	140376	74464.9	132057	425642	680159	296942	146321	70719.2	38061.4	14417.7	8384.34	6169.88	6018.84	6465.53	5383.53	5484.19	5069	4736.48	4930.66	4402.09	3980.66	4427.31	4980.97	6513.91
87839.5	186873	126075	105576	64925.3	91471.3	47017.1	38197.4	30953.8	28455.5	30815.3	42994	59485.8	62898.2	61583.4	55496.3	27140.5	193736	117458	265465	218404	174420	94324.8	78288.1	25026.5	21785.6	11278.4	5924.56	4823.62	5150.75	4521.72	3930.38	3615.91	4520.91	4924.34	4704.12	4056.09	4295.25	10592.6	5748.38
91693.4	83861.7	53247.6	48236.5	71908.1	84885.3	67608.8	59038.7	39506.5	43880.9	55947.7	43881	62898.8	32760.8	17292.9	56173.2	106186	315523	191629	220044	199935	292569	83376.3	28997.2	10561	15407.6	7478.5	5723.31	4263.78	4553.19	4439.88	3320.12	3829.59	4585.48	5150.69	5024.97	4471.44	4236.5	5251.5	5012.34
69735.3	59712.4	47178	18236.7	25359.6	28041	23553.5	26549	14285.8	51333.6	32911.8	13429.8	19080	20048.9	104617	147949	60168.7	101054	119369	201074	108242	63423.4	29878.3	14323.4	7711.12	5257.75	4339.31	4446.22	6585.03	6044.03	4704.12	4785.91	4332.97	5268.52	4660.12	4590.94	4773.34	4112.88	4452.5	4031.06
152404	73075.4	24567	14298.1	13788.4	13400.2	17255.3	9913.03	17004	20848	12599.6	94492	73501.5	75859.4	62227.2	56872.2	99929.1	83015.7	76076	59973.8	41930.3	24516.3	17198.6	8805.75	6924.75	5276.53	4993.47	4886.5	5597.47	60525.4	87781.1	84031.2	22682	6152.88	4301.47	4150.56	4320.28	4100.22	4282.69	4723
98449.4	41741.7	18847.2	8497.53	10749.8	13177.2	40277.4	129513	61651.9	67073.6	103450	84938.8	99486.6	150310	198198	99092.3	62956.2	26347.5	25825.2	24912.8	21036.7	13851.4	6666.81	5094.19	18853.9	8522.69	6824.22	6459.28	7201.62	6943.62	13003	61151.6	135914	22411.1	7597.94	3823.47	4924.41	4641.28	4540.59	5421.22
25189.5	18607.9	8541.53	4760.81	5484.06	11185.7	18954	67756.3	66992.2	56439.8	38027.7	31942	931107	223805	73803.5	37581.3	36699.7	34588.8	24642.2	51717.1	48552.9	9642.62	6132.12	9290.47	31565.5	7239.34	6113.38	5446.44	5031.19	4691.53	6798.94	9409.69	5001.95	4808.34	4326.75	3188.16	3244.78	5018.66	4370.69	5622.78
22370.8	15845.8	7144.97	6056.72	22644.7	20547.9	20413.7	18224.1	16267.4	20785.1	19778.2	17676.8	16600.8	26794.3	38207.4	24346.6	51366.1	37339.7	43981.3	28977.9	19135.3	5981.09	3873.84	5069.09	8076.22	22081.1	12260	6446.62	4754.47	4804.78	3697.72	4303.58	3508.94	4837.09	4767.06	3037.15	2169	4540.59	4905.44	4767.03
12844.8	8944.12	5232.59	4672.72	28733.7	118686	36328.6	25667.9	38210.2	42710.2	41572.9	29764.5	17116.8	21766.8	32483.2	22867.8	17922.1	22452.8	15965.2	8971.23	4678.91	4471.34	3257.38	3980.62	9881.59	19633.7	34296.7	11014.2	4874	5257.75	5094.09	3754.25	4949.47	5987.45	5377.28	3106.38	2276	3464.88	5301.81	4509.12
13555.7	11466.9	7333.69	7207.81	9730.47	12300.1	14172.2	30507.3	54812.1	44843.8	40702.6	25799.9	22722.9	19369.3	12486.2	13838.8	19602	20105.5	17808.8	12479.9	9233.72	4276.44	3565.47	9126.94	39123.5	39337.3	23673	19149.2	7195.25	5597.44	4855.16	5484.16	5314.22	4837.16	4905.38	3489.94	2219.41	2426.97	3936.59	5377.28
15097.2	19243.3	16953.2	18727.5	20369.6	16736.6	33517.8	68091.9	51490.9	35466.1	20388.5	19067.2	17362	15996.8	16921.7	17078.9	20873	27008.2	26549	18038.1	14430.2	8384.25	4936.91	12077.4	68962.3	76586.1	31093	14323.3	6943.75	5993.75	5213.59	4842.5	4748.19	4290.73	4590.88	3596.94	2307.47	2326.31	3188.06	4387.51
44800.8	49803.8	54757.9	64276.5	70629.6	80099.4	77297.9	72524.4	62413.2	39393.2	21621.8	17783.7	13801.1	14304.3	15103.3	14606.4	31892.5	56647.9	63987.2	41354.5	25793.7	15430.4	11114.6	45791.7	101281	93722.6	50485.3	17400	7673.38	6270.56	4741.91	4238.62	4880.16	4377.09	3716.5	2160.57	1691.02	2062.19	2418.64	1980.34
55193	125631	141376	159339	141071	94703.5	79797.6	70194.8	67525.2	68665.2	45171.6	23528.3	15701.1	10787.4	15682.3	21231.7	53205.8	110025	128202	105452	67834.8	32061.6	20552.1	48880.9	111242	137039	58480.8	22730	9051.22	6176.12	6144.66	3999.53	3376.84	2845.84	1609.28	1091.33	1449.8	2684.88	2408.12	2628.19
81461.4	266986	408211	389748	259323	218940	192746	166249	126798	99938.8	89686	40501.8	27064.7	18350	13624.9	15260.8	77759.8	211235	306321	263820	181789	96192.3	65139.2	127219	286499	341018	117377	31690.3	13209.8	7755.12	6358.59	4024.75	3326.5	3298.66	2829.59	1250.69	1548.38	1514.88	1923.81	2206.91
102574	453988	604266	569731	433334	345538	340772	262801	181438	162642	104941	64822.3	40847.5	32608.8	32558.5	28870.8	87417.9	328779	446742	467135	431542	244082	106820	152401	277981	421429	135635	36951.8	13870.4	8359.09	6264.28	5018.59	4616.03	4923.48	3496.38	2408.12	2087.38	2225.59	2596.75	3024.62
133176	481648	319432	388378	540770	577675	478017	398731	282123	246151	211761	140279	119878	100638	86504.4	77133.9	77493.3	233228	417021	292127	292944	352421	253164	154769	139684	223933	144688	58872.8	18884.9	9692.81	6371.03	5031.25	7371.44	6900.52	3968	3213.22	3685	2835.94	1911.09	2112.47
200578	486181	242820	225210	208692	170848	239612	370393	454516	404379	322074	279326	202468	110335	136458	102012	71309.6	122155	281334	201747	138677	128367	229843	223887	136107	172035	149942	64493.2	22119.1	11265.7	33949.8	21653.7	18205.2	9452.88	5729.44	4163.12	4339.28	4679.03	3395.69	2257.19
208
373450	387037	379864	383315	410490	423949	557646	679589	840514	700673	563996	360718	186171	160375	395141	425080	440638	600490	533584	502255	537245	1048693	500537	180253	165211	103023	83487.7	158346	139343	144613	275784	215197	168259	185014	147854	262166	527936	435785	246615	383554
347315	452124	458872	368260	371665	579122	681679	593857	573708	604197	631010	407236	228154	183117	357462	363370	460993	388743	505656	403497	1018066	1.8212e+06	1378672	426076	330779	209926	74484.1	98575.7	193062	152669	250841	243502	183878	361030	915081	388470	510420	586508	456065	319905
313145	348843	413496	472577	466533	531808	663132	498388	402864	435798	419585	311569	297117	287722	256451	462158	395699	378718	589166	588368	2935260	3.19729e+06	1.63505e+06	615144	196987	112798	85824.1	110346	113678	156039	205426	161856	158475	242832	773782	193813	93703.1	826866	779104	359309
326292	292912	448479	486464	500168	493446	596070	562492	555336	505644	463581	479716	349109	312204	231523	364688	547720	573304	2286813	2960144	7703163	7.7642e+06	6.58858e+06	1.33644e+06	363077	586655	624203	326334	189751	195941	124359	135653	230874	238510	550708	174584	188922	765730	408820	339504
370011	463053	465129	507541	521054	532086	603744	612991	567636	554979	482496	529860	406510	375462	445877	548446	825251	697621	2913440	2.08833e+06	2755780	3.96321e+06	4.12982e+06	1.89851e+06	646002	278861	149476	242720	212183	84774.7	105455	104684	151672	186200	238762	117630	178873	628060	305696	188223
484232	503093	482624	528888	524796	552254	565588	570450	517237	546678	539061	497776	435554	516408	620786	634506	518672	694773	1.38053e+06	1.51783e+06	1.60565e+06	2.50515e+06	959884	713900	362062	261850	523004	399485	95885.9	68300.9	92582	52919.8	46077.3	97106.8	190262	130092	161790	157389	236257	202729
349627	360438	429363	519371	538112	555190	488245	450186	432431	505532	520206	542246	466450	405809	418790	493548	863532	843219	950860	716922	1.45517e+06	1.55015e+06	1.2543e+06	139500	107731	106395	99360.6	49123.5	48991.3	58723.3	37032.6	29486.8	31072.8	41387.1	82564.2	247986	331391	130712	54279.8	116709
396336	413327	475992	481816	534433	489868	481463	498714	484696	474875	535668	553541	529373	679033	394846	540708	464725	564791	832752	1.09849e+06	2.34055e+06	7505296	1.04714e+06	292490	185093	119716	106200	100160	83059	87045.6	77215.3	63161.5	58578.9	48458.1	258090	467622	231231	77852.6	61657	144034
401026	383425	389665	399492	485882	479501	444140	431254	421144	535154	618497	591797	392910	381899	460279	410981	302852	330527	757540	1.34972e+06	3.23204e+06	1.59613e+06	380266	147506	106138	87272.5	79709.7	87952.5	106478	102786	91976.8	103441	71718.2	171561	406755	159631	97981.3	66794.1	58390	165866
498539	472426	279434	304880	336559	341923	407775	349256	346177	455452	525474	499308	364661	394319	271659	169832	169171	394230	289850	670004	845769	1.15133e+06	391742	180357	88671.9	94326.9	94654.6	88418.5	100986	110339	109029	88607.4	137879	434853	176654	80086.6	81692.1	69766	56860.5	111205
1.3363e+06	989302	233985	112953	97898.4	84824.2	102661	169553	183418	257066	185728	132890	154487	182193	208849	606715	570069	849295	823551	866582	1.10745e+06	2.02087e+06	644246	222749	91412.6	83205.7	113552	102283	89716.8	129972	110296	64660.3	285863	428376	90964.7	48179.5	47203.6	47146.9	46750.3	80537.8
195779	128286	209748	71633.1	50961.4	52457.8	73494.2	129494	148559	609390	318428	129283	130246	423876	400968	364058	262958	268523	275153	405496	267881	127150	103870	56665.7	43471.1	46511.7	76192.6	496954	430346	283426	163648	289889	958124	347390	82296	41884.9	38341.5	38303.9	46700	81331.6
174229	197334	83083.2	50042.3	63363.2	61451	75464.9	99813.1	169641	156839	94527.9	244239	180256	3.91735e+06	6369704	1.72593e+06	1.03731e+06	285322	149592	230028	110925	114309	81371.3	66964.5	66630.8	93458.7	217793	209930	266577	308348	713891	1.39076e+06	977690	345763	125426	59025.8	39480.9	37857.2	49274.4	88831.9
187563	127153	73078.3	50357.3	63804	56364.4	128520	416852	249247	327938	655451	367617	1.02213e+06	9751913	21214322	3.33513e+06	1.09514e+06	700616	365630	176901	155218	108758	90901.9	88376.4	254031	168991	77971.3	79792	121683	175540	303134	1462054	1.97796e+06	422016	166464	82292.5	40620.3	37706	47606.5	100990
368398	287959	135919	79923.6	70131.4	103321	140082	197105	615209	363402	298242	611021	1.20679e+06	1.54181e+06	1.04564e+06	295815	429748	620271	539949	372799	212070	100985	99164.5	127904	189010	77495.2	44112.9	68024.3	108197	121580	184966	238452	144912	80326.2	118977	81701.4	29600.3	26573.3	35918.7	91433.2
509324	445218	245933	162012	92512.6	158738	126412	119399	104797	90478.3	74174.3	79809.8	125879	292890	712358	294674	297134	260979	323961	262629	337740	221795	134593	153900	89904.9	57030.2	45384.4	68469.3	62809	86625.1	122594	126118	75087.5	96307.1	126078	82418.9	35786.6	28530.3	36075.8	111585
384829	278226	226996	118994	105878	211472	331390	339281	216971	132354	104709	89325.5	148202	181440	161842	212783	357169	252722	191373	117055	108292	81837.6	87890	92847.6	69778.8	62173.1	60240.4	52321.1	61065.8	105697	120672	128008	99101.4	134785	128820	104739	57300.6	51269.7	56872.8	109265
288398	400594	453786	305307	233204	223719	342236	328769	258696	245494	310458	216402	189068	379192	261193	566882	304925	149150	108217	75828	67480.7	58603.6	58603.7	91353.6	70886.8	57999.3	62160.5	65397.3	76881.9	96096.4	103649	181924	202801	221598	150898	145326	65588.6	24452.8	25692.4	87397.1
336456	192484	118120	223181	499565	279060	178867	257127	111072	82064.3	83652.6	169635	390786	411315	240059	246341	98770.6	73134.6	88286.4	83564.5	85937.6	56746.7	57880.8	69458	60574	63048.1	74570.5	64315	59794.4	85307.6	100653	237509	229131	250904	134803	71769.9	43515.6	22602.7	23238.4	108047
161667	205180	112684	138530	120313	119078	81018.8	70288.8	94111.3	158623	96915.3	93564.4	169514	172734	328800	184349	110409	69956.1	57445.2	54486.6	62137.9	43200.4	51950.7	87104.9	110945	80445.7	66611.8	62884.5	44635.5	47700.9	66247.6	130252	197861	144924	80283.1	48525.7	310851	557417	345952	182209
168784	162764	83342.6	117806	131422	94398.3	76024.9	71188.9	83329.9	121027	66127.2	68336.9	117343	154563	140890	61991	65018.9	75168.4	75460.9	89173.2	73815.5	48877.9	65639.3	99082	70156.6	60907.9	83959.5	83374.2	47474.7	39581.4	46033.2	63239.1	93243.1	77634.2	83764.8	110233	128418	144576	129066	181766
111380	166487	69558.5	82952.5	82926.6	77649	65560.3	67883.3	70465.1	58679.1	48210.6	76884.3	312492	237848	105653	86957.1	80124.4	79803.2	74979.5	78828.7	88160	138308	338368	132631	57250.1	54876.8	75741.7	85716.5	43843.4	25742.7	31337	41268.4	61550.4	64717.5	81894.1	59762.9	76069.4	73091.5	41192.6	129383
113126	152884	221213	144870	92915.2	63868.7	62740.3	51150.2	44937.5	39744.9	170238	366391	184016	86240.1	84823.2	127252	101079	97762	259470	198532	170757	423881	236654	77122.5	311081	264004	95051.3	60713.2	41576.6	34307.5	39990.7	82003.8	129418	167036	143182	116072	132349	136656	86586.3	180904
135274	177368	691414	747126	542269	274986	112493	62847	53592.8	85400.4	201491	209989	116696	69231	62645.6	54341.8	66989.4	74029.1	252952	408866	575497	384033	156480	125051	269817	374429	130797	103176	83361.1	87423.2	107662	89041.9	115437	153447	107342	66164.8	64497.1	86939.3	86655.7	116743
180337	274194	595633	891533	770421	533112	217218	180120	181779	241902	192509	108577	65259.3	56438.5	61103.3	59403.5	70982	80502.9	153913	474959	732294	616051	490170	182660	144845	200287	137680	125895	140115	151517	139249	98492.3	86602.4	84075.2	79495.5	56526.7	72299	99592.3	102484	132956
207
147069	157684	151809	152446	159254	165485	217492	264457	333906	276338	222054	145127	77183.5	60013.3	156481	175220	172620	237412	209045	197356	213793	429252	196881	71528.7	68701.7	42620.3	33934.6	62544.5	55190.5	58219	108511	89658.4	71509.6	75467	60372.1	103927	215085	178537	86096	155569
138497	176228	183883	146395	146568	230614	275031	239726	222912	238159	250158	164816	91100.3	71087	146026	141988	179868	157804	198575	165895	313713	712544	589477	168252	132866	85189.5	32179.2	39725.2	76698	66075.5	99862.9	99705.3	75299.3	148159	363999	155931	230913	236734	179711	132877
122800	140617	159591	188064	185902	210783	266848	202319	159733	178068	164575	125863	116525	115563	100136	183794	159230	149788	224524	231870	1.1404e+06	1.30535e+06	644932	261629	84313.1	45735.8	34513.5	46308.2	44004.5	60875.3	80563.8	65880.8	64073.5	93114.4	309207	80601.2	38327.4	312143	323863	142046
132283	117596	176026	193136	193349	195435	234543	224244	217826	199740	185390	188532	137628	126328	93758.4	143831	213992	223133	903628	1.17505e+06	2.99805e+06	3.1714e+06	2.59546e+06	537038	152964	232800	246702	131983	75582.8	85389.7	49839.6	54598.7	92045.1	92536.1	221934	72203.3	75820.7	293840	172219	139412
148008	182458	184842	199588	206068	214823	242475	242671	227688	222230	190902	214072	162420	152459	177257	216105	321075	272448	1.10268e+06	842846	1.03576e+06	1.65582e+06	1.59754e+06	669949	308417	81006.1	62121.7	101334	84910.4	34444.6	44100.9	42695.7	60120	73195.9	95537.8	46553.9	69572.1	251888	126153	76245.1
192360	204899	189755	209353	208671	219933	224944	224464	209562	217523	217364	200200	173724	202068	250898	256105	203016	278290	494819	628062	642403	1.00653e+06	383011	291948	145618	108750	201462	164934	39171.3	28686.4	37383.3	21475.1	18832.3	35311.1	74483.4	51897.8	65867.3	64815.9	94045.9	86821
137576	142096	172451	207687	211289	220245	195595	178769	169297	201153	208482	221366	186753	162325	164140	191984	347482	331848	377857	290965	561468	649304	132893	54920.1	46277.2	43047.7	39926.3	19952.3	20197.6	22670.4	14459.5	12257.5	11791.9	17116.4	33783.8	96821.3	136679	51175.1	22934.9	45157.5
158586	163957	193302	196461	215542	197230	192441	198742	196402	191079	213687	218842	209149	269994	159290	216129	186178	224301	329658	445508	877148	3109648	436071	120058	69179.3	48297.3	44678.1	40612.1	34249.2	36112.1	31115.3	24092.5	22311.8	21675.4	99758	188733	93051.9	33393.8	24822.3	61715
157553	154189	154698	161574	195002	193777	178340	174122	167595	211021	249128	237639	157685	152811	183839	161120	124549	135168	300662	485636	1285076	654902	156970	57487.9	44634.1	36017.8	32789.3	36017.6	43337.3	42311.3	37981.3	41109.2	31555.7	65927.1	166625	67631.1	42695.6	29472.8	23683.4	69506.4
196447	188386	112495	122189	127437	136134	142007	135888	134377	180957	209405	201149	143993	158051	112411	66289.3	68084.1	153375	124637	257132	330836	458652	159519	73437.6	37226.4	35992.5	36917.6	37276.4	42179.3	46509.5	46106.7	38956.8	57529.8	174037	71932	32292.1	35495.3	30762.8	22236.2	41431.8
511952	408468	97473.4	41329.9	41297.3	34512.7	42236.5	68410.9	72132.1	101155	75414	55032.8	62878.3	76698.8	77871	240220	217754	336278	324999	347551	425989	903803	259618	72537.9	40096.9	30649.6	44992.7	43299.9	37389.8	54900.4	45521.5	27182.2	115719	178280	39235	20864.7	19713.1	21141.3	20399	32198.3
81875.4	53673.3	84822.6	28580	20235.3	22114	29856.8	52558.9	58046.8	247244	133038	52559.4	52414.3	166156	162751	144052	107824	105607	105064	151571	112854	52175.1	42626.3	23551.5	17101.9	18851.1	30775.7	197032	176612	117907	65169.9	111015	377987	146356	35156.5	18492.5	16126.8	16705.7	20864.5	32311.4
73297.9	81303.7	33054.1	20568.8	25854.4	23962.2	30265.8	36867.1	70711.1	62298	37282.7	96213.2	73664	1.46055e+06	2.44534e+06	634691	384412	121702	59861.3	45899.2	46352.7	45628.3	33682.9	26999.8	26251	37699.6	86579.4	86251.6	107782	125266	277133	563309	396550	145672	51458.7	26823.6	17548.6	15535.4	21355.3	35407.8
76509.9	51256	30152.4	20279.4	25206.3	24271.3	50034	164355	103093	125217	264334	149842	400302	3.79224e+06	8667763	1.30865e+06	524869	280681	139409	69404.1	56758.2	66664.6	35080	36571.8	102970	69251.7	31058.6	31681.7	52370.2	72227.5	110320	482905	807647	179041	67410.6	35262.8	18523.9	15868.8	21216.9	43163.5
147922	116996	55159	32594.1	28075.8	41943.4	54566.8	74802.2	244756	156604	129370	234912	467398	630488	425648	118595	170727	243697	219035	152545	87620	40612.2	39667.9	50954.1	77246.1	30561.7	18404.3	25628.2	43796.8	48190.4	74852.8	98268.1	59851.1	35160.1	49789	35023.7	14566.6	11609.4	15352.9	35326.2
198640	180132	98155	65836.9	37893.1	62662	51482.2	48932.9	41090.4	37534.4	31499.2	33393.3	51955.8	112977	291750	121578	117388	109199	128099	105955	135690	90470.9	55322.4	60818.4	35602.2	23966.8	19404.8	27880.6	25338.5	34488.5	49625.3	50475.4	32147.4	39720.4	52514.7	34016.8	16756	12439.9	14748.8	48678.8
155461	115887	91012.5	48732.3	41739.3	86978.9	133353	139230	87317.4	52703.5	42166.8	35979.9	60455.2	74058.8	64872.8	85640	145887	103055	77976	49021.3	43224.1	33141.7	36326	38459.6	28874.8	25080.4	24042.1	20468.2	24212.2	43041.9	52275.3	52590.6	42066	53244.1	52779.2	42342.8	24501.5	23224.1	23576.5	49489.4
112228	158586	185061	123854	94420.2	88310.4	137535	135430	101658	99944.4	126171	87950.7	76779.9	153155	105834	225436	126532	61403.6	44262.6	31535	27068.9	24564.4	23538.8	35721.8	28421.8	24463.8	26307.5	26420.8	30385.3	39592.4	41908.5	74777.2	82497.1	87820.2	61082.5	61233.6	26005.9	11269.7	10992.8	37574.1
132679	82093.3	49499.5	88088.2	196384	114337	72031.5	105218	46340.1	33531.8	33620	66482.3	157493	171138	94680.3	100860	41229.3	29982.4	36709.8	35124	34733.8	23947.9	23910.2	29051.2	25558.6	26062	31499	26848.9	23928.9	36747.8	39592.8	95988.8	90627.3	101778	57973.2	31738.5	18624.6	9822.82	10326.1	42715.8
63468.2	85053	44760.1	55542.5	48794.3	48762.1	34041.7	29900.7	37523	65074.5	39875.6	37200.8	68895.9	69948.1	128395	74541	47302.8	28428.2	23960.4	21876.7	25162.1	18536.5	21330.3	34595.7	46131.9	32719.9	26515.2	25508.3	18467.3	18517.5	26817.4	51332.4	83334.4	60223.4	33632.5	20499.7	121912	228206	145576	76325.8
70585.7	68277.8	34356.3	47995.2	52646.8	39770.5	31153	29409.8	33833.8	50475.5	27704.3	28138.5	45855.6	61032.4	57931	26137.7	26175.3	31285.1	30102.4	36893.6	30706.2	19140.5	25886.3	40108.4	28654.6	23463.2	32600.3	33632.3	20575.2	16397.3	18448.6	25798	40542.7	34368.8	33890.5	44357	51098.8	58093.4	56393.9	71964.5
43732.6	67351	28868.6	31820	34142.2	32944.7	26552.8	27547	29365.7	24520.3	20109.4	30624.7	124734	96747.6	44325.6	36514.7	33330.3	32493.3	30687.3	31391.2	36049.2	54727.5	138095	54261.1	23614.3	21663.6	29781	35690.3	17838.3	9923.38	12572.1	17800.4	25388.7	26270.6	32738.9	26144	31719.4	30945.3	17932.5	55238.1
46186.3	64085.8	87623.3	58640.6	38182.6	26953.7	25357.3	21833.6	18895.1	16730.8	63840.2	135710	73771.4	34469.5	33991.1	51085.8	41411.3	37956.3	101489	78823.5	69940.8	165574	97015.4	31725.8	120306	109769	38906.5	25263	16787.4	13125.7	17171.3	33280.4	54730.5	70080.2	57078.7	46648	53887	56764.5	35205.7	73242.5
53228.3	68275.7	268578	298462	221875	108427	46617.4	25665.6	21141.3	34501.7	79685.5	83554.9	48537.2	29195.8	25992.8	23607.9	27408.6	31499.3	99919.6	160209	226166	157843	64010.8	51425.6	106740	150920	54089	42468.8	34154.8	35942	44501.7	37496.6	46434.4	62539.3	45660.3	27515.7	27465.4	35067.3	35659	48135.1
71855.7	110444	229310	354965	311368	217804	89696	71256.6	72705	95768.4	77440.8	45628.7	26729.2	25760.4	24262.6	24174.4	30643.3	32046.6	58660.8	188757	287051	242898	199173	74457	55687.9	80759.4	55190.1	51475.9	55485.9	59842.8	58054.5	38900.3	32455.8	35275	31694.2	23733.9	30165.2	40983.3	44180.5	54240.4
206
199198	207876	204755	204130	219239	230337	296934	363686	462515	387754	311386	200936	106012	80100.8	209349	240828	240020	330054	287056	277709	295759	610499	284355	116133	133747	70992.5	56247.2	95714.4	94450.8	97545.3	162956	130577	98223.2	110066	97240.3	150273	281970	264322	124747	212177
194278	246176	254563	205417	207921	314374	378064	329993	311999	330114	347943	228799	125705	98261.3	195361	197670	246418	217038	275336	231493	417455	981318	859337	260702	197208	133895	60792.7	71565.6	127861	104208	148743	147829	107087	199155	502891	234042	277073	350214	271074	191826
172003	193365	221490	256872	256627	290306	367302	281136	221649	238297	230454	173479	163377	161975	141756	258275	225071	205110	309121	333594	1.57545e+06	1.76848e+06	915253	373165	124101	82377.1	66628.2	84958.3	79857.6	96473.1	126782	96523.8	91818	130356	430106	127047	66130.9	422032	469919	195205
180660	159242	238312	270882	272712	270566	326191	312846	301777	280030	250505	264949	190934	176643	140476	201907	295927	310576	1.24113e+06	1.56034e+06	3.89315e+06	4260952	3.74528e+06	772456	246443	335822	375883	203265	123329	127236	82761.1	80204	131824	132284	315936	111078	121877	423351	244062	200946
207877	253648	255648	273326	288085	287711	333647	333369	311273	308359	263804	295510	228492	213290	245691	306773	452088	383688	1.55438e+06	1.20863e+06	1.44564e+06	2.10043e+06	2350744	954709	400625	140562	117292	156517	136118	61631.7	64939.5	67724.7	86031	109858	147643	76394.8	106317	345262	178419	104749
265541	280056	266602	288221	285930	307018	312871	310034	289643	299502	294285	279803	242331	281253	344813	344888	284593	389295	637692	869140	892519	1.3739e+06	546333	403147	219206	168446	301425	249312	65451.9	50021.6	61195.1	37181.4	29176.2	63687	125413	84832.4	109965	93322.3	132268	120343
190101	199089	238109	285733	294544	308960	272657	247366	236220	270478	288253	300135	263972	223884	232308	266855	483596	462565	523624	405037	753968	949111	200456	95402.7	76822.2	74190.2	65539.8	35513.3	37099.4	43581.9	30453.7	23582	21146.9	37456.5	66597.5	150775	215335	85203.4	36885.8	61839.7
214337	227145	260129	267581	290965	268579	265238	276666	273173	259846	297393	304020	290880	390562	217276	296773	260234	309316	450846	619970	1.14637e+06	4444203	634350	196652	112127	81161.4	72049.2	64204.9	55762.2	58034.5	52180.6	41089.5	38490.2	45067.2	164479	293522	178095	69849.7	42210	83779.3
218345	215951	215550	225429	266020	268006	243340	242275	230932	288940	335131	326755	218907	214728	262796	231027	176262	189343	412124	651888	1.77622e+06	929403	240340	104683	84897.9	66918.5	55095	54937.4	63927.4	65010.3	62384.8	82685.1	74820	126149	270434	121434	98134.6	73178	40793.8	95618.4
275650	269141	167060	170949	180213	190718	204054	192189	194462	250144	289291	282361	202905	225393	164205	102954	100221	218607	165800	353614	458703	644223	242200	117478	67233.9	60773.4	59319.2	69228.5	84991.4	105643	107042	102242	126702	301658	140082	69033.3	73699.1	84946.7	42789.4	61670.8
702854	605748	153264	63927.7	66647.9	70021.4	73933.6	107332	105908	152894	114357	90759.4	98862.5	115386	115612	359661	306200	475319	471701	472656	611095	1.13446e+06	430622	117570	59778.9	51387.5	81226.4	100976	88215.8	132383	110306	66181.7	178929	275370	72367.5	46175.2	45237.3	66188.2	44803.7	49759
116865	81338.4	122322	49259.7	40900.7	40275.8	53760.7	83875.4	85544.5	338438	196929	87819.6	85664.4	232452	241010	212031	160259	163543	176061	232076	178900	89853	78365.6	45200	30642.5	35073.7	73775.1	301369	264298	187066	116862	166394	534440	227973	70608.6	45589.9	40296.5	55977.7	61883	49323.2
105941	125338	55864.1	39289.6	46911.7	43483.9	57487	64928.4	100675	94960.7	59551.9	136814	119483	1.95976e+06	3.56935e+06	931369	575851	187251	103804	83014.7	80424.4	83472.4	63159.3	48636.5	42430.2	71821.1	153235	165553	182079	190000	403129	797630	597186	248237	118417	82181.4	52986.5	48082.8	79643.5	60471.7
121776	83322.5	55239.7	39818.2	47144.8	45901	78023.3	236639	150411	176731	376156	216602	555333	4.95871e+06	12068285	1.91617e+06	718400	411492	235967	121108	96213.8	82001.3	64335.6	59905.7	158582	117849	51412.4	73895.8	120739	124784	178728	676244	1.16156e+06	279853	133286	90173.7	60465.5	41586.8	77056.2	95391
209099	173662	87687.2	54232.9	48107.5	64355.7	91395.9	114580	360180	218791	180249	368521	672756	872532	619782	189244	249617	350003	311783	224864	136984	69014.8	63738.6	74285.9	110918	55895.1	34210.7	43098.1	99224.1	115446	131559	163639	113310	97642	121873	86433.1	62057.6	41643.4	50934.8	94582.7
290882	266311	148665	98559.1	60842.5	101724	85185.3	80658	74205.3	65407.2	56328.7	55718	81742.2	169008	425171	190483	173743	160130	187307	166518	189229	130362	81722	89185	60729.2	53980.8	41951.8	49593	41637.1	84099.5	120342	95609.1	73692.8	83290.4	130266	83839.2	64059.4	46162.9	39969.1	110296
228917	174145	133066	78076.9	73108.2	130864	192623	204207	137758	89442.6	74077.4	61642.1	92660	116303	107799	131439	209517	155043	119467	79481.4	70015.9	50134.5	52054.4	60099.8	50379.9	51645.2	55548	43714.2	43154	68688.3	122297	111742	80174.4	84195.2	101112	82074.5	62127	63260	50203.8	86676.5
178821	237389	261924	181597	142279	136093	198349	203641	161513	145301	182811	132472	121472	225601	156468	316212	193536	100692	75607.2	57915.1	46899	40479	38874.2	56202.7	55598.5	48315.2	52123.6	56146.2	58034.7	63694.3	92951.8	146263	128849	135278	104132	113091	56776.3	47207.4	34745.6	65964.4
192734	133782	84952.3	138785	286292	177020	114514	160606	83952.1	66578.1	54679.5	99463.3	223329	253176	148549	159770	77133.1	59539.5	69083.8	65023.7	65010.2	45911	40051	49882.5	50373.7	55950.9	58909.8	54667.1	47088.1	56788.1	82821.7	174035	136643	150044	106582	70173.5	42795.3	39648.2	42436.5	86069.9
101036	144874	84265.9	100377	95167.8	91097.5	69833.2	62038.5	64904.6	102199	65016.8	64494.1	104080	113703	192159	127199	86678.3	56857.7	49076.9	49490.5	50084.1	37407.8	41694	60131.5	80078.2	66174.9	57952.8	50845.7	39686	35318.3	55500	108210	185390	144639	81923.8	55390.9	181651	323917	232504	135536
112079	121548	71268.9	84838.9	92333.3	75782	66042.7	58299.1	64733.2	83252.3	54534.6	50864.5	75494.8	96649.2	97841.8	61610.6	60206.6	63228.4	61107.3	70255.8	57808.2	43726.6	49468.6	72691.6	56989.6	51783.6	64953.5	66244.3	44998.5	32498.8	42224.2	64204.4	93511.7	91327.8	77558.8	79152.3	92699.7	98017.4	96007.4	131230
83754.8	116816	51588.6	59482.8	63335.7	62764.4	57927.5	57178.5	54572.3	50165.9	47175.9	54113.4	183663	147587	73592.3	63146.6	65186.4	66162.4	59961.2	62404.6	68498.5	94652.6	206796	99155.1	52148.8	46886.4	60105.9	66552.8	37231.9	20794.5	30372.8	54522.1	61579.4	59339.8	64670.2	55403.5	65784.9	59105.2	40114	105878
81276.9	101072	127482	88764.3	63606.2	52102	52734.3	49429.5	44828.1	42637.7	98694.7	207777	115463	63228.6	61786.9	85998.1	76589.1	73428.8	154271	118045	103401	245749	160873	62719.1	174801	164255	75267	51236.4	31284.3	21782.4	42343.9	78895.2	106746	108454	92573	83163.5	102986	104637	66659.8	109891
91181.6	103718	371240	416208	309735	161579	73247.7	46905.3	44595.2	61674.4	127659	136878	93186.7	54572.4	50228.8	48000.5	57153.4	63914.6	145171	227551	323836	228829	104718	88744	154988	221573	94457.5	79026.5	60124.9	69563	95634.3	74360.2	79335.3	101953	77408.4	60848.9	63720.2	87459.1	82824.9	91264.4
115796	159913	313923	484214	426901	307798	125276	102090	108315	138701	120424	81414	52646.1	46962.1	51519.4	47893.8	54440.2	65986	93614.9	251686	398116	337617	284590	117819	94728.4	122788	93927.1	88932.5	90608.5	91749.3	92793.6	67674.3	60856	63764.5	61585.7	57562.5	69657.6	89046.7	100900	101417

## Sheet: PXG20-1
PXG20-1		WC1 Correction factor: 1.02909
238
553824	548588	653245	833994	752575	719896	780722	858716	700660	686335	544090	553650	557325	496142	492266	524035	498195	444110	546043	504119	553141	626460	597532	452133	555803	544034	566059	551843	511044	500881	526770	414105	511533	481684	496779	509479	443819	363554	317063	427882	477357	539622	552886	562152	555445	538255	507647	457182	538026	510457
639974	531163	308653	485350	572112	796898	628888	643517	623871	622635	762981	662679	665918	808063	912888	680757	741467	730003	613378	608549	562500	675782	620529	590334	722748	562143	787895	793366	666005	757258	573096	542249	511885	455704	500599	717726	487462	538738	373781	393625	466661	451245	455242	640756	364159	567924	519736	450984	479648	487461
686211	563170	497164	564762	896649	807971	906222	874330	701177	795756	646982	862539	881157	918022	884090	828807	693296	726276	747261	726438	874692	752317	779977	775910	886443	844042	794553	748396	868423	871200	605484	500365	528732	489402	531521	616194	588893	673230	607685	778823	716519	555211	479405	606732	664072	559986	632211	536665	541502	586765
709088	592456	550082	720520	734626	654604	841391	721187	813482	881134	620538	708405	754612	1.22776e+06	995593	1.06465e+06	838962	791106	576902	670762	847899	753507	741907	820273	807765	684012	565090	697942	770724	1.04596e+06	785125	647722	646493	667970	646193	646060	696321	632235	683008	549657	598355	746253	762079	782800	594798	604525	609805	684418	1.03932e+06	1.0295e+06
598468	598188	650025	688920	854667	1.03491e+06	1.13561e+06	821493	849497	830089	774272	961606	906846	760611	778742	815911	770819	792530	821778	890607	970313	569680	767165	781057	875107	919184	868630	889980	745357	780141	819330	617116	717048	774339	921517	765785	629647	612808	755318	609917	761091	702018	669295	883550	986568	1.17436e+06	1.17431e+06	1.22766e+06	1.11998e+06	1.09702e+06
752574	621848	913361	626895	720985	913697	957961	970087	1.14228e+06	1.0474e+06	863910	817369	975180	1.12315e+06	808450	833768	547559	612393	606889	698607	700642	730287	523627	537505	554663	633379	787225	833286	826883	872363	736080	798078	855027	796706	926531	993105	912463	882010	690590	698522	814481	946379	1.22871e+06	1.18108e+06	1.19755e+06	1.06674e+06	911763	1.07729e+06	1.10412e+06	965980
837461	789483	799467	798186	822905	824946	882541	899938	855537	998980	794743	855042	787043	1.01478e+06	963755	985236	706541	887286	686006	657394	854281	792314	616999	804325	832300	808910	880160	771882	616040	688617	760960	623441	693358	1.04635e+06	1.07155e+06	849874	837580	926401	732096	1.04241e+06	935743	825533	864803	1.12649e+06	1.26475e+06	1.21758e+06	1.20151e+06	1.02909e+06	1.27379e+06	1.05519e+06
871142	871539	602471	692389	931513	731014	848519	814190	754228	796533	758634	754565	750968	892796	819005	706300	722110	716696	809696	729869	903088	862963	793169	796413	906442	1.16255e+06	945250	696053	882455	1.01694e+06	861662	695562	653373	645075	680212	807647	861312	1.88644e+06	1.11836e+06	1.26149e+06	912045	1.18e+06	940829	887612	874236	905694	1.11489e+06	944782	845886	1.06588e+06
985801	1.00219e+06	877862	851321	1.00484e+06	968635	976831	925095	1.01252e+06	1.06272e+06	918342	1.03782e+06	1.02349e+06	1.04066e+06	1.01711e+06	1.26363e+06	1.05872e+06	1.02863e+06	975186	791436	836202	855266	831991	668572	719630	874478	951546	816795	853507	995977	664044	795757	825613	931859	592433	905020	758704	1.11213e+06	879108	1.08056e+06	1.09682e+06	1.16663e+06	939386	1.06421e+06	1.10579e+06	1.14994e+06	1.12153e+06	1.06575e+06	994537	1.10854e+06
763904	918246	1.0166e+06	860405	946285	1.01949e+06	1.11895e+06	1.07891e+06	1.53141e+06	1.30086e+06	809777	1.03075e+06	846477	873219	1.00076e+06	1.10379e+06	816232	781784	780141	806384	781874	947398	891291	807108	1.12059e+06	1.0911e+06	767622	580322	608435	729802	738958	1.13083e+06	636109	653492	755171	778398	792233	983396	1.11821e+06	1.06016e+06	971203	952240	930160	998613	1.46068e+06	1.47978e+06	1.12436e+06	1.33012e+06	1.2384e+06	938508
876689	984724	736398	775696	836373	822935	730790	759558	894409	1.00794e+06	1.26561e+06	1.06329e+06	962083	749891	889992	889434	741396	743964	700120	720999	682003	815975	646258	629402	671202	894619	1.0299e+06	836336	677558	633757	672588	659259	879962	978271	952112	905775	882208	1.05153e+06	947450	1.03102e+06	979699	1.33767e+06	1.77375e+06	1.33856e+06	1.26291e+06	876151	1.14642e+06	1.10032e+06	1.15429e+06	1.02806e+06
950181	872468	782808	747471	683491	735286	828117	902255	686492	932692	930322	895152	839293	784339	958189	954515	1.03242e+06	1.10477e+06	882565	883509	859779	763807	716835	727775	693477	829301	800147	726610	829347	901535	882459	837964	860185	859321	807259	1.12019e+06	949759	967988	1065939	829076	746496	897244	968300	1.05836e+06	1.03004e+06	1.26478e+06	881971	846599	982606	861353
928812	817433	672915	809051	830634	791141	887456	849747	1.10481e+06	1.11765e+06	865795	659626	841206	921948	794857	729567	981528	1.12237e+06	684123	1.28347e+06	843482	1.15913e+06	974203	817101	730522	860018	986925	1.20278e+06	959079	968046	941699	997747	1.28155e+06	924259	981490	1.05981e+06	983871	754590	1.11065e+06	1.0357e+06	812292	952821	1.10662e+06	931111	932419	1.14856e+06	938884	858160	1.03116e+06	994126
650114	863025	899983	940311	735034	727552	861744	786783	916398	1.15615e+06	871121	752125	948603	921715	892839	965912	954173	639627	805192	1.0855e+06	677159	966161	1.10548e+06	939746	926101	888898	1.09947e+06	986471	1.04428e+06	966537	993119	1.02474e+06	860545	949178	1.17215e+06	1.17198e+06	981381	865884	702215	763058	694997	657697	857789	857755	838481	1.01688e+06	1.14667e+06	1.07637e+06	1.11932e+06	864565
612590	766586	815815	845093	812831	802753	808108	828728	799750	935394	911399	981923	943623	897090	849802	851340	749666	796948	635272	629375	760931	770247	975419	844902	782023	675458	1.06564e+06	1.35097e+06	1.00773e+06	1.16204e+06	1.1764e+06	1.04103e+06	940241	964557	976941	835599	1.02189e+06	884612	803993	837868	973365	1.21463e+06	1.10354e+06	988160	835481	891880	907223	988337	1.16366e+06	1.16645e+06
628459	676417	893118	916442	925041	881326	988990	894307	898545	884328	966510	851015	799262	907967	773208	735975	980902	958958	711823	932245	968333	811547	831555	782796	694040	745743	712519	858900	728345	904647	992468	781585	1.11316e+06	1.17609e+06	1.11159e+06	1.17837e+06	1.11762e+06	1.13655e+06	931624	1.19638e+06	926839	930473	1.50065e+06	1.06672e+06	970405	1.31053e+06	837909	1.01212e+06	921411	797262
672201	841046	831115	696055	826869	891001	1.19e+06	1.02086e+06	942903	861621	834605	722825	803388	799286	633943	791083	947127	1.04229e+06	1.07261e+06	1.18822e+06	1.05788e+06	854004	854736	618803	1.12064e+06	878468	1.14828e+06	839513	960182	1.0496e+06	1.05118e+06	905128	871430	1.11196e+06	1.02785e+06	1.02683e+06	847215	890982	1.21482e+06	1.00586e+06	766959	839827	1.24405e+06	987745	881171	959798	819364	962555	1.18021e+06	1.23596e+06
533036	667392	708962	691578	676805	807789	1.03789e+06	871497	1.084e+06	1.05765e+06	844644	810536	781183	773042	949299	944441	782122	787818	956516	1.0809e+06	978758	988001	844154	692190	778532	1.02199e+06	966280	753285	656472	679531	669118	747230	966537	943859	894588	1.06283e+06	1.11054e+06	1.33088e+06	1.45901e+06	1.17178e+06	943217	941203	877121	967848	943571	1.21847e+06	950351	1.07532e+06	1.22882e+06	1.1052e+06
717853	634884	608499	718139	717233	1.13173e+06	847420	891661	1.14707e+06	948683	808338	974918	924129	930466	875374	1.16335e+06	1.20803e+06	1.05259e+06	960636	954546	1.05218e+06	1.18494e+06	932301	757741	804214	818442	808799	895097	924958	690359	678681	732029	773493	753638	925701	1.02542e+06	1.08756e+06	1.19124e+06	1.08936e+06	988634	1.06376e+06	1.14193e+06	1.07253e+06	900931	839178	853262	800316	996506	982706	1.16018e+06
676449	575316	670756	654223	581431	699417	781732	863304	1.07162e+06	877569	921591	1.03745e+06	927045	1.10787e+06	1.05238e+06	1.10488e+06	936495	878823	843359	909553	1.27256e+06	903903	910392	939561	762652	683691	740134	811468	832060	912788	953388	922788	966023	994060	1.11471e+06	1.23754e+06	1.29252e+06	957997	800073	885759	840811	794147	842776	781847	813698	753794	830380	1.05261e+06	1.02506e+06	871322
490236	629460	671067	735536	790951	731946	869306	889699	898666	850589	812548	940091	1.07137e+06	1.0262e+06	1.10213e+06	930127	817691	884972	1.05494e+06	1.13231e+06	1.06411e+06	1.00103e+06	980072	873239	767256	871902	1.00092e+06	934301	912022	930700	950465	865167	951790	994850	1.11504e+06	1.17231e+06	935012	1.02103e+06	854116	767861	820035	843770	835397	984885	1.00045e+06	971167	1.03446e+06	941480	946097	851838
684784	630712	786702	889749	752191	640475	713599	662748	810992	947719	798727	881695	983133	1.0211e+06	857681	1.13343e+06	1.22379e+06	1.17379e+06	945884	1.07229e+06	927311	860305	1.02048e+06	981119	924753	964243	828782	785594	915017	1.01134e+06	955929	977230	1.10937e+06	1.00926e+06	880642	1.11665e+06	1.1336e+06	918137	816294	913145	759743	796669	1.07923e+06	985675	1.04935e+06	1.12462e+06	906710	905402	1.05256e+06	988226
548228	554433	762088	893484	965043	688940	704407	683622	778627	814067	706268	830299	958707	957639	923954	981506	846294	885831	923142	984393	1.09783e+06	850211	860530	806780	831530	924586	905923	802915	730321	1.07878e+06	1.09143e+06	995171	1.18162e+06	1.16998e+06	1.11048e+06	1.01949e+06	898106	986099	955936	957531	950885	1.04919e+06	1.04573e+06	1.05532e+06	981227	976810	1.04297e+06	952528	938717	843957
681756	668122	709909	790599	732967	661055	815358	789189	645985	852380	932861	748286	851607	1.05921e+06	899947	952403	987058	963708	984362	1.05051e+06	935088	763162	847088	965351	741945	814583	1.00346e+06	865035	822704	1.15867e+06	900950	911541	1.03602e+06	964951	929190	1.11629e+06	1.0107e+06	909545	1.0082e+06	999704	843893	995189	1.04885e+06	1.01018e+06	962403	951609	836175	747691	961475	1.135e+06
665613	629319	714466	801458	874396	739674	770835	796654	714879	978026	1.06632e+06	989176	869388	944081	905285	972000	894172	785183	755629	944117	963641	975254	947762	778001	975309	1.03468e+06	1.04259e+06	790690	896530	943628	870934	1.00011e+06	992165	881565	1.03242e+06	1.12839e+06	1.11784e+06	973041	853664	849486	893718	880323	1.13055e+06	999215	993217	1.2046e+06	1.18561e+06	1.04126e+06	971942	871898
605324	576699	635371	864086	799421	739891	961168	926227	787529	882319	857771	738558	837572	998468	874998	830864	876909	1.02855e+06	930100	1.01135e+06	1.00705e+06	1.01282e+06	1.13626e+06	1.09465e+06	868881	860214	991272	898739	854174	1.00017e+06	949356	929823	1.11176e+06	1.16165e+06	937997	908347	1.00756e+06	984635	770372	792965	839313	841705	1.18093e+06	1.04977e+06	929836	1.0209e+06	966477	801630	932999	1.10597e+06
665904	603564	575278	615862	715876	815978	951466	852692	814720	789158	798096	978678	1.02994e+06	933835	720705	679441	766378	926848	902672	951905	1.0572e+06	928256	1.01897e+06	1.00521e+06	1.06722e+06	984586	1.00161e+06	1.06749e+06	1.05814e+06	1.09812e+06	1.00126e+06	870705	1.0449e+06	1.20077e+06	1.03038e+06	991165	999968	837759	872352	974775	818204	939467	1.01673e+06	1.00502e+06	916472	978360	925970	938339	1.03198e+06	1.02166e+06
610076	782279	802015	925483	886416	835548	803356	814115	843554	746649	821584	757701	768558	733021	799825	848098	860970	881992	977573	978867	1.03009e+06	968017	976697	999220	923405	906061	1.13152e+06	1.05488e+06	876349	885210	992852	886897	840185	931471	985092	1162084	1.02821e+06	1.02976e+06	874018	854823	949967	818463	894486	972868	957940	999256	883195	829121	885272	909589
482886	676577	906599	1.05855e+06	1.10283e+06	725429	619651	762748	815369	825598	676274	822396	846584	884598	885691	881041	873341	965127	991879	1.00173e+06	1.06965e+06	1.13266e+06	1.15138e+06	932138	892961	842004	840308	926446	988896	879519	937613	945387	942649	847504	1.14782e+06	1.17272e+06	914759	1.16264e+06	1.09702e+06	1.08677e+06	1.02441e+06	943678	946355	969812	976255	876645	962154	1.03478e+06	959815	964966
541921	660652	745441	728476	790471	775990	780041	767703	808347	749523	725933	825945	991788	769255	850728	978604	977482	962282	998904	1.01424e+06	951660	1.1011e+06	938489	779755	942429	965200	870379	910896	1.15094e+06	1.06757e+06	969868	1.106e+06	907187	930665	1.10741e+06	1.03308e+06	962394	1.16314e+06	1.13357e+06	982938	1.09354e+06	1.06938e+06	900944	828500	874425	937163	950083	1.33441e+06	1.19458e+06	918226
562918	685083	832567	725064	830239	837521	733228	803892	948126	845964	877669	1.00437e+06	793962	987892	922061	989878	981078	998460	995692	976534	1.02047e+06	1.06733e+06	997113	885473	831619	762113	788664	997045	1.1646e+06	999263	1.03148e+06	854318	896975	994743	1.02337e+06	1.05183e+06	1.02155e+06	989841	1.02993e+06	941168	995369	922428	1.08031e+06	1.05735e+06	963390	905305	1.00432e+06	1.02594e+06	1.09768e+06	891319
785327	897446	808397	823238	773897	908319	860060	864546	850184	923932	1.02359e+06	939280	909769	1.04969e+06	886812	858423	881482	979160	934019	990173	999836	1.14711e+06	1.09292e+06	900928	787404	750720	851243	1.0739e+06	1.06338e+06	913082	910328	862396	989927	903099	898318	1.10417e+06	1.0044e+06	955338	939073	930547	858766	1.05147e+06	996140	955579	880211	966091	930623	861428	830044	811531
235
4981.76	4103.84	4062.96	6819.78	5778.35	5574.28	5778.23	6942.47	4838.87	5124.88	4430.54	3777.07	4593.86	3593.31	3818.01	3715.69	3756.63	3511.56	3409.55	4287.59	3960.71	4205.9	4083.32	3429.8	3817.95	4226.4	4491.91	4328.47	3225.61	3041.91	3429.8	3001.16	2613.14	3450.37	3123.66	3450.37	3532.06	2511.13	2102.74	3103.16	3818.07	4328.35	3511.68	4410.1	4348.85	3736.07	3838.26	3674.94	3797.51	4164.9
4777.8	4389.66	1878.1	3348.3	4308.09	5410.71	4675.55	4941.12	4410.22	4920.62	5206.64	5226.89	4348.66	7371.36	7371.24	4736.74	5369.96	6738.09	4532.55	4757.3	4369.28	4144.59	4264.94	4164.97	5002.32	3552.43	5574.09	5880.36	4777.62	6411.44	4226.28	3368.61	4246.72	2858.09	3552.43	5349.58	3817.88	4144.65	2633.58	2490.57	3715.76	3654.62	3123.6	4675.49	3062.22	3960.77	4307.97	3368.61	3491.12	4062.9
4206.09	4001.64	3777.01	4308.03	7044.47	5880.48	6084.56	6043.8	4818.56	5982.67	4430.48	7024.22	6676.96	6003.05	7269.17	5880.42	5206.57	4573.42	5798.73	5145.32	5533.28	5533.22	6225.42	6003.05	6554.39	5676.22	5594.47	5492.4	7126.23	7024.1	4634.67	3756.69	5002.25	3164.48	4083.4	4246.78	4573.42	4450.92	4307.97	5267.77	5471.96	3777.13	3899.58	4083.46	4369.28	4634.61	4205.96	3613.69	4941	4451.04
4941	4226.4	4430.54	5431.21	5431.09	5206.39	4920.56	5921.36	6533.95	6248.12	4287.47	5737.48	5390.4	9924.17	6738.21	7759.26	5737.41	5594.41	4655.05	5329.02	6329.57	5574.03	5462.83	5288.14	6370.63	4634.67	4512.05	5839.48	5369.84	7779.57	5819.11	4471.41	4879.75	4982	4512.17	5063.51	4798.12	3899.58	4022.02	4062.96	4961.56	5819.17	5390.27	5553.65	4328.47	4185.47	5022.75	4369.1	7391.68	7820.51
4246.72	5533.22	4736.8	4777.74	5717.04	7432.55	7902.14	7085.23	6309.38	6023.43	5308.7	7187.42	7064.91	5206.51	5574.15	5635.35	5941.61	5369.9	5757.85	6717.77	6881.28	4410.16	5916.8	5349.4	6983.16	6717.65	6799.52	6860.72	5533.28	6023.3	6166.31	5124.82	6084.68	5696.72	6921.91	5594.53	5022.75	3919.89	5063.63	3674.88	6002.99	5553.59	4961.38	7003.66	6881.09	8453.66	8800.81	8903.06	8759.93	9086.88
5206.33	4696.05	6778.96	4879.75	5206.45	6186.69	6268.44	7248.73	8882.44	8310.84	5962.17	5533.28	7616.38	9188.89	5594.53	5349.4	4226.1	4144.53	4573.42	5145.2	4736.86	4981.88	3938.09	3817.88	3797.51	4124.33	6309.25	6084.68	6145.81	6105.06	5206.45	5472.02	6166.25	5676.16	6533.89	6901.65	7493.75	6084.56	4838.99	5370.02	5839.6	7657.13	8290.34	8331.16	8576.05	8310.66	6227.62	7432.55	8167.65	6901.59
6003.05	5390.33	5492.34	5492.52	6350.07	5921.3	5492.4	6554.27	6329.63	7350.86	5492.4	6248	5227.07	7473.37	6370.51	7840.89	5186.07	5982.61	5410.9	4593.92	6656.52	5206.45	5535.45	4655.11	5655.91	5574.28	6431.94	6513.39	5002.25	5614.85	5247.39	4839.06	5104.32	8167.84	7718.38	6717.71	6043.86	6962.91	5982.37	7412.05	7616.25	5471.9	7391.56	9495.27	9127.57	10128.4	9413.58	7207.8	7698.06	7534.62
7187.48	6513.45	4205.96	5574.22	5737.48	5492.4	6717.65	6350.19	5798.73	5206.51	6370.44	5533.34	5226.95	6595.14	5512.78	4512.23	6513.57	5574.15	6676.9	5716.98	6350.01	6921.91	4972.81	5635.35	6309.25	9229.76	7350.98	5349.46	6717.65	8167.77	6738.15	4757.24	4593.92	5186.07	4798.06	5798.67	6431.82	14867.4	8984.63	8678.24	6554.33	8555.85	6881.15	6656.64	6636.14	6799.4	7697.88	5921.23	6636.08	8065.58
7432.43	7657.07	6370.51	5247.39	7881.64	7616.31	6615.7	6390.88	6472.64	9168.45	6738.15	7677.51	8228.97	8923.43	7146.54	10291.8	8596.61	6186.87	8065.71	6145.99	5921.23	5839.54	5844.18	4920.75	5819.23	6860.72	7391.62	5553.53	5778.41	6493.14	4471.35	5329.02	4940.94	6207.12	3756.69	6840.28	6166.37	8126.9	7126.04	7738.76	7922.64	8004.45	5900.73	6717.71	8678.3	8188.15	7881.76	6962.66	8126.96	8903
5043.07	6350.01	7820.57	6043.8	7024.04	6411.44	9046	8576.17	11108.8	9148.01	5492.46	7452.81	6635.96	6431.7	7657.07	7677.63	5165.7	5574.09	5717.04	5145.32	6391.01	7698.06	6788.01	6105.06	8657.92	8760.05	5472.09	4369.35	4614.42	5737.48	5655.78	9372.89	4614.3	4838.87	6166.25	5512.84	5737.35	7473.43	8024.83	7963.39	7248.73	7187.54	7391.68	7309.92	11170.2	11435.6	7616.44	9189.01	9270.76	7044.6
6472.64	6105.06	5431.15	6452.26	6043.74	5962.05	5165.64	5962.11	7126.04	7289.49	10312.1	7207.8	7105.79	6207.12	6207.19	6207.06	5267.83	5859.92	4818.49	5186.07	5574.09	6819.84	4173.99	4328.47	4777.62	7800.13	7677.57	6431.88	4205.78	4695.99	4552.98	3756.63	6002.93	6268.44	7452.87	6411.51	5717.1	8269.91	7473.31	7493.62	7718.44	10046.8	14826.2	9781.22	10046.8	6554.39	7514.12	8126.78	8902.87	7371.18
6615.58	6186.69	6288.81	5226.83	3797.63	5043.01	6166.31	6636.02	5533.22	8249.41	6554.2	6125.43	5778.35	6309.25	7697.82	7984.02	7841.01	8045.09	6186.69	6084.62	6329.69	4920.5	5444.72	5717.04	4471.23	6268.44	5717.1	5002.38	5696.66	6391.07	6717.71	5655.72	6758.71	6023.43	5472.02	7902.14	7167.16	7820.57	8147.22	6207.31	5165.51	6574.64	6309.31	8147.22	6860.72	9883.29	6105.12	5839.67	7269.05	6248
7309.99	6186.69	4879.81	5614.91	6534.01	6350.13	6778.96	6493.14	8249.47	8208.47	6881.22	4328.47	5329.02	7963.64	6268.44	5145.2	7330.43	7371.24	5921.36	9434.08	6002.93	7555.12	7895.44	5186.14	5492.59	5267.7	7269.17	9005.06	7616.44	6533.83	5655.72	7861.32	9474.83	7697.94	8024.77	8004.39	7146.54	5492.4	7146.54	7207.92	5574.09	8045.15	7534.68	6738.15	6329.75	8821.31	6554.27	5860.04	7616.13	6819.96
4961.38	6105.06	6533.83	6431.76	5512.84	4920.56	6554.45	5492.46	7207.67	8473.98	7248.79	4798	7616.25	7697.94	5247.45	6370.57	6615.58	4634.86	5839.48	7636.69	5084.07	7064.91	10019.5	6738.09	6227.69	5329.08	8208.65	7207.92	7452.99	7657.19	7718.5	7412.18	6676.96	6350.19	8800.93	8923.43	7371.24	6350.07	5022.75	5492.4	5533.22	3858.76	6309.25	6595.14	6186.81	7840.83	8678.3	8127.02	8800.81	6309.31
4593.92	5614.91	5757.91	6002.99	7146.66	6309.25	5390.27	6207.19	5472.02	6717.71	6881.09	6350.07	6002.93	6207.12	6411.51	6472.76	5390.4	6431.88	5226.89	4532.67	5369.9	5635.35	7786.55	6840.22	5063.51	4675.55	8024.65	9964.98	7371.24	8760.05	8535.36	7371.24	6166.43	7289.49	8167.71	6411.26	6881.22	7269.17	5676.16	5941.73	7800.19	9393.14	8698.68	7371.24	6370.51	6921.97	7126.23	7432.43	8269.91	7371.18
5124.82	4777.74	6676.71	6962.72	6983.28	6288.88	7003.66	6758.65	7657.19	6309.19	6431.82	6350.07	5308.64	7412.05	6533.95	5349.58	7044.41	7105.67	5880.42	7105.67	8412.85	5635.41	5589.89	5410.65	5390.46	5431.09	5553.78	6289	5043.13	6207.25	7493.69	5798.73	8943.87	8392.35	8310.66	8351.59	8024.71	7820.51	7391.56	7881.95	6472.57	7248.73	10577.7	8024.71	8167.65	10148.9	6431.76	7248.73	5982.49	5390.33
4900.06	5962.17	6023.36	4900.12	6207.19	6799.4	8474.04	7555	6636.02	5533.22	7595.94	4981.82	6002.99	5859.92	5410.83	5451.4	7779.76	7024.1	6677.02	8780.24	7555	6390.94	6443.15	5594.53	7902.2	6207.19	9474.9	5676.16	7840.95	7963.39	7983.89	6513.51	5941.67	7412.12	8269.91	6901.53	6064.18	5798.67	7943.02	7840.95	5063.57	7003.72	8474.1	6860.47	6207.19	6860.65	6595.14	6738.21	9393.14	9311.45
4348.72	5226.83	5206.51	5451.65	5451.53	5553.59	7841.07	5553.65	8147.28	7820.57	5819.11	6309.25	5676.22	6125.31	6411.38	7023.98	5308.46	5696.72	6288.94	7881.7	6431.76	7493.75	6370.43	5308.52	5308.58	7248.61	6860.72	5288.14	5267.7	4348.85	5369.84	5880.24	6860.65	6370.63	6758.52	7371.12	8657.98	10067.3	11170	8821.18	7738.88	7718.38	6656.52	7248.67	7881.83	8167.77	7902.26	8188.15	8821.12	8229.15
5226.89	4634.67	4614.18	6207.25	5553.78	8861.88	5410.83	6881.03	9372.71	6962.85	6248	7473.37	7412.18	7514.12	5696.54	9045.94	8841.74	7452.99	7534.56	5941.61	7228.42	8841.81	6261.65	5574.15	6350.13	5696.72	6431.76	6819.9	6697.21	4900.12	5043.13	4797.93	5921.3	5798.79	6554.33	7698.06	7575.5	8535.42	8576.11	7983.89	7840.95	8596.79	8535.23	6350.07	5778.29	6799.28	5737.41	7493.75	7371.24	8514.85
5125.01	4410.16	5758.04	4757.12	4348.85	5083.82	6227.62	6493.2	7228.23	7718.44	6125.43	8167.77	6145.81	8249.34	7983.77	8474.1	6942.35	6329.51	6288.88	5962.05	8923.19	6921.91	6987.79	6493.14	5369.84	5206.33	5410.77	5982.49	5635.47	6043.68	8024.77	6309.25	7126.29	6799.46	8433.41	8903.06	8862.12	7064.79	5349.52	6472.7	6574.83	6411.51	6554.33	5921.3	5165.64	5553.84	6125.49	8208.59	8147.34	6411.44
3838.39	4695.99	3981.33	5124.82	5737.54	6533.89	5982.55	6411.44	6003.05	6370.57	6227.69	6390.94	8290.22	6717.83	7064.91	7350.92	6084.56	5900.73	8351.47	8249.34	8800.81	7555.06	7496.15	6125.56	5022.69	6248	7371.24	7779.82	6533.95	6738.09	6492.95	5962.11	7024.1	8351.59	8596.61	8433.29	7391.62	8106.4	6043.74	6391.01	5696.66	6452.38	6493.2	6533.89	5982.49	7411.99	8085.9	7514.18	7207.8	6145.87
4940.94	4859.31	5206.45	6860.53	5451.65	4818.37	5451.53	6023.55	5369.9	7085.35	5655.6	6023.36	7003.48	7126.23	6350.01	7636.81	9066.38	8147.34	7779.76	8535.42	6717.65	6942.35	8421.8	6493.01	6901.47	7861.32	6819.9	6207.12	6166.25	7269.05	6758.59	6697.27	8290.28	7146.6	6186.62	8371.91	9352.33	6493.01	6002.93	5921.36	5900.86	6186.75	7881.89	7166.98	8331.16	8759.87	6084.68	6411.32	8147.34	6411.38
4409.98	4267.22	5982.55	6248	7146.66	4736.8	5492.4	5390.27	5553.72	5329.08	4757.3	6615.64	6574.77	6921.97	7105.67	6881.03	6717.71	6431.94	6350.07	7412.18	8004.27	5798.67	5844.13	5839.6	5778.23	7289.36	6860.78	5369.77	5839.6	8392.29	7922.7	6472.76	7902.26	9536.09	7881.7	8167.71	5941.61	7452.93	6697.33	7963.33	6554.39	8208.59	8208.53	7779.7	6595.2	7085.29	8841.56	7473.49	7595.94	7024.1
5063.51	4736.8	5819.11	5962.11	5921.23	4226.28	5900.73	6248.06	4981.94	6860.65	6656.46	6084.49	7636.57	8616.86	6207.25	6983.1	6493.07	7616.25	7902.26	7534.68	6840.28	5594.47	6116.36	7065.04	5778.23	6288.75	7187.48	6023.24	6390.94	7902.2	6983.16	6921.78	6799.52	7473.31	6819.78	8576.29	7269.23	6533.83	8474.04	7881.7	5961.99	6043.74	8004.45	7024.04	6799.28	6186.69	6084.62	5696.72	7452.93	8290.34
5022.69	4900.19	5104.32	6084.49	5859.98	5676.22	5859.92	5778.23	5492.28	6799.34	8576.23	7309.99	6574.7	7575.56	6145.81	7330.43	5880.48	5451.59	5655.72	7023.91	7003.66	7616.19	6969.51	6411.32	8923.43	7840.89	6431.7	5819.11	7228.23	7289.61	6942.35	7595.81	6329.75	6697.21	7391.49	7779.63	8106.52	6574.83	6881.22	6738.15	7003.72	6248.06	8106.4	8331.03	6574.83	7984.08	9822.22	7820.57	7902.14	6717.77
4389.66	4267.15	4062.9	6125.43	6064.24	5533.15	7044.41	6452.2	4553.05	7207.86	6574.7	5492.4	7105.85	7473.31	5798.67	5737.48	6901.47	8780.43	6819.84	8433.29	8371.85	7514.12	8095.12	9004.88	6676.96	6758.59	7350.68	6350.13	6064.06	7371.36	6595.26	5655.91	7432.49	7759.26	6411.51	6942.47	8555.79	8167.71	6411.51	6309.38	6431.76	6493.07	8678.3	8269.91	6778.9	8106.4	7024.16	6431.82	6758.52	9311.58
5574.09	4430.48	4185.47	4655.05	5186.14	6472.76	7187.3	6350.01	5696.6	6288.75	5451.53	7391.68	7595.94	7269.11	5655.78	4307.91	6656.39	6472.7	6554.2	7105.73	7187.6	7105.73	6951.46	7902.2	7963.45	7616.31	7534.56	8657.98	8331.03	7861.51	7800.07	6370.51	6513.45	9638.34	6738.15	7698.06	7759.38	6819.9	5614.91	6799.52	6248	6840.28	7473.43	6942.35	6656.58	7350.8	7350.8	7800.13	7779.76	7983.95
4328.41	5614.91	5676.16	6595.08	6860.65	6166.31	5717.16	6513.57	4981.88	6472.64	5512.78	5553.53	5043.25	5676.28	6227.69	5594.47	6390.82	6615.64	6656.46	6595.26	7473.43	7024.1	7423.37	7350.92	6840.22	7738.88	8555.73	6778.96	7493.87	7024.04	6084.62	7044.53	6145.75	6329.69	7473.31	8433.41	6329.69	7555	6799.46	6350.13	7126.04	5880.48	6513.57	7759.32	7064.97	7269.17	7309.92	6248.06	6064.18	7126.1
3409.55	4614.36	6697.27	7555.12	8106.4	5839.73	4409.98	5206.45	5676.16	6268.44	4552.92	5594.53	6656.39	6962.85	7350.86	7064.97	6309.19	7105.79	5921.3	7636.69	7820.45	8698.68	8458.3	7330.43	6493.01	7064.85	6166.37	6758.52	7105.79	6983.22	7207.8	7412.18	7105.79	6084.56	8147.28	8821.18	7248.67	8494.36	7779.51	7983.89	7473.25	7350.74	6615.7	6983.28	6983.22	6452.32	7269.23	6942.41	7105.73	7126.23
4144.59	4900.25	5982.37	4941	6268.44	5410.83	5594.53	5900.8	5819.23	6043.68	5676.16	6207.12	6595.26	5655.85	6472.7	7412.05	6207.12	6840.28	8086.08	7636.87	7473.31	8126.9	7369.03	5308.58	5982.49	6901.41	7003.6	6819.84	8739.67	8576.29	7044.41	8208.65	6799.34	7146.66	8065.58	7779.57	6554.45	8903.12	7269.17	7575.44	7861.45	8678.3	6697.33	6697.27	7228.42	6738.15	6452.2	9597.4	8800.87	6513.51
3368.61	4226.34	5941.73	5247.33	5226.89	6758.59	5553.78	5921.23	7105.79	6166.31	6493.01	6452.38	6533.83	7657.19	6942.35	7677.51	8249.28	7269.23	7881.95	8045.27	6431.76	7575.5	6497.77	6288.75	6207.06	5349.46	6615.46	6962.85	7309.92	7493.69	7697.88	6370.69	6533.89	7207.92	7024.1	8004.33	6922.09	7207.92	7759.07	6615.52	6758.46	5880.36	9127.63	8106.46	7595.81	6615.77	7820.51	7677.63	7963.58	6758.59
6064.3	5471.9	5900.92	5880.42	5165.82	6574.7	7105.73	6656.46	5819.29	6860.72	7269.11	5880.42	6064.24	8433.29	6513.39	5941.73	6390.82	7677.57	6962.78	6329.69	7350.74	9168.51	8149.46	6411.38	6431.94	5635.35	6595.14	8392.29	8330.97	6554.33	6554.2	7064.97	7371.12	6227.62	6595.08	7330.49	7044.41	7064.97	7391.8	6881.03	6166.43	7371.24	7432.55	7126.17	6002.93	7412.12	6942.28	6615.58	5676.16	5859.92
232
30506.5	27936	23402.8	28401.6	27187.2	26843.3	29130	31012.1	26235.8	28482.4	28968.1	29615.7	29453.8	25305.1	26033.9	27450.3	23140	22209.4	25730.1	23382.7	22250.3	25467.3	26233.8	18668.5	19538.1	19477.9	22573.4	23524.4	21804.4	20893.8	24617	17657	22350.7	18911.2	19012.2	24738.4	23605.4	20590.5	16240.5	18769.4	19295.5	19275.3	17252.3	19497.9	18263.5	19619.2	18587.4	16058.5	20448.8	20367.8
34918.7	31801.7	19680.2	30670.2	28645	35850	28320.7	36946.2	34271	31983.9	35566.7	27734.2	26701.6	34534.6	38623.9	25871.9	28199.2	28401.4	27187.1	28300.3	26539.4	27571.8	24093.5	22229.5	24981.5	20893.9	26762.4	24233	22998.8	26782.7	22452.2	22492.5	21561.8	19902.8	20509.4	29109.9	23200.8	23261.8	17980.5	17009.4	20833.1	21359.4	20914.2	26883.9	14642.6	25710	21561.5	17940.1	20186.1	19356.2
34959.3	25993.1	25629	28786.2	42814.8	33744.8	39251.1	39817.8	31963.6	37752.7	28927.9	33927.5	34372.2	33704.5	34837.8	32631.6	30647.8	34291.2	35951.7	34048.4	36194.1	30405.2	30641.4	28563.2	31194.4	30243.2	25224.2	24536.1	28421.6	29757.4	23989.8	20934.6	24374.3	23584.9	21723.6	25892	26458.5	31295.9	28381.5	34271.1	23828	19821.5	19639.5	25528	27632.4	23301.8	27511	20469	21460.8	21602
39170.2	34028.6	29535.5	35526.2	37671.9	34979.3	38805.7	34695.8	40527	45770.9	31720.9	28684.7	24637.5	38927.2	33704.4	36903.1	33076.7	33785.4	24941	24880.5	27085.9	25932.4	30407.7	36882.8	33359.9	27288.5	20428.7	23908.7	25325.5	37125.2	28684.8	23241	24354.2	26782.3	28604.1	29291.9	28745.5	28138.8	30020.8	22775.9	23180.4	24394.4	26377.5	26600.2	21703.3	19518.2	17373.6	18142.2	27935.9	28057.4
35465.5	36133.2	31477.7	27632.6	36396.5	46985.4	47188.2	32186.3	32408.7	34352.1	27956	34534.2	29939.5	27591.8	30951.8	31396.7	34352.2	29757.4	33056.7	37187.5	37308.3	21905.9	26683.4	27672.8	26458.5	33279	29615.6	28097.7	26964.5	25406.4	29494.5	24253	21743.8	24536.1	29818.3	29008.8	25669.5	21298.6	27956.1	21845.2	25204.2	21784.1	18081.7	20954.6	23301.8	26539.6	26397.8	28442.3	25224.4	22573.3
39109.2	32368.7	45831.3	28178.9	32793.7	36578.7	36679.8	34392.6	40587.4	36336	33825.7	27875.3	35810.6	40405.3	27106.3	33158.5	23787.9	22431.9	26519.7	30728.8	32084.9	33765	23553.5	23807.5	22816.2	25406.3	32145.6	31842.4	31983.9	32064.8	26600.3	27794.2	25608.6	25466.9	28158.7	29129.9	26195.4	27774.1	22836.4	24495.6	24698.3	24596.8	27834.9	23079.4	28786.2	26215.9	20732.1	24030.5	26317	24475.5
39574.9	41296.2	58698.5	44028.9	38947.4	35384.5	35850.1	33218.5	30141.9	38522.2	28684.9	29797.7	25203.9	33805.7	28686	34473.7	28118.1	36436.7	30850.2	26215.5	38644.5	36801.6	25892	31295.9	29615.9	25183.6	32651.6	33036.4	25285	22694.8	26013.4	22148.4	21744.1	30972.2	30445.7	24374.4	27166.9	31599.2	25993.1	29980	25871.9	19942.9	21440.3	27288.4	29534.7	29373	33932.5	25446.6	29049.3	24819.5
42996.4	51927.1	36477.6	32146.5	39291.5	31761.5	35081	33117.1	28441.9	26782.6	28624.3	28421.7	26823	30344.3	27167.2	24596.8	29130.2	27207.4	32956	25507.5	31538.6	32125.3	28932	27672.9	32611.3	39777.6	36801.9	24030.3	33421.3	38664.1	32044.8	22856.7	20246.4	19538.6	17940.2	24900.5	25972.9	51424.6	31194.6	31478	22290.3	31316.5	23038.7	21925.8	23969.5	22553	25386.3	22472.4	20934.5	22411.5
37530.2	36963.2	34777.2	30243.2	39716.4	34918.7	34372.1	34554.3	36214.1	36942.8	29170.6	35060.3	29878.7	29635.8	30283.9	36254.9	23079.4	27288.4	32712.6	27349.2	31133.9	30486.2	28212.8	20549.9	23706.7	29372.8	30749	25973.6	23141.8	33482	23079.2	26843.2	26438.4	29858.6	20145.2	30708.8	23281.7	29494.4	23787.5	29433.9	29231.2	29696.8	20813	26195.7	28603.8	27329.1	43287.6	29939.5	26438.4	33807.8
28219.4	31113.5	37773.1	32327.9	35930.8	35141.2	38866	35101.2	52332	43301	27450.6	33522.2	25912.2	28259.8	29534.7	32328	25123.3	25224.2	28198.9	26114.5	26519.4	30142.2	27241.2	27086.2	34959.6	38097	27571.5	21278.4	21764.3	28725.2	29615.9	43180.5	21683	22452	26964.4	26175.2	26296.8	35526.5	33441.4	27997	25871.6	23483.9	25305.2	26984.8	36012	31923	27369.7	31174.4	30223.6	24273.1
32328	36477.2	31235.2	38745	38947.4	37024.3	31659.8	29312.4	33096.9	35687.9	41396.9	34069.1	32449.3	23119.8	31255.1	28927.5	26479	26762.2	24576.5	24758.9	25467.4	28178.8	22222.7	23160.3	27632.2	36659.8	40141.8	31315.8	23746.9	24070.6	25365.9	23848.4	29109.7	30647.8	33157.8	27511.3	24799.1	29393	25123	25163.7	24273	24900.5	32672	28300	32671.9	20266.7	26013.4	25709.8	23949.3	21116.5
37469.3	33299.4	35546.1	37145.5	33340.1	32590.9	37672.3	36194.1	26236.2	31376.6	29696.7	27227.5	26094.6	26640.9	29373	28927.7	32567.8	34250.9	25811	24981.4	25790.9	24819.5	25370.4	27531.5	26317	25406.3	23160.1	19558.5	23787.6	25629	26721.7	27450.6	28017	29372.9	25952.8	35242.5	64934.7	77570.3	55011.3	30546.9	24495.6	26478.8	26762.1	29838.3	27025.1	29980.6	16220.5	17272.4	22775.6	20185.8
40890.9	38522.6	29878.8	36740.7	37632.2	31680.2	33259.1	28583.7	33866.4	31761.1	26134.8	21804.5	28239.6	32510.3	29049.1	23807.7	26237.5	33502.7	21521.7	37894.7	25669.4	32044.4	27133.1	23220.8	20711.8	22351	27713.4	26591.3	23403.1	25365.9	29842.4	25325.4	31761.5	25709.8	25831.3	25041.9	25790.6	21278.2	32651.9	34029.4	23221	25568.3	29494.3	20853.5	21319.1	30162.2	24212.5	22634.2	26903.8	24131.4
27693.1	31477.9	34936.1	37631.4	29575.3	30486	34271.1	30688.2	34028	42693	29130	23767.5	26742	28320.7	28462.5	29190.7	30587.2	22350.9	25345.6	33137.6	20590.7	27370	28464.8	25113.9	26702.1	26985	26418.3	22755.5	24435	22775.7	24981.4	24556.4	24961.2	22411.4	28341	29919.2	24738.5	24172	21662.8	21197.5	20995.1	17474.8	22249.7	22856.8	21662.8	28421.7	34190.2	27895.3	28907.7	21157.1
25183.8	28401.4	27996.6	34918.6	30992.4	30000.4	26519.4	28340.6	27308.7	33117.1	27551.3	23747	25123.1	28725.3	28097.7	27652.6	24070.7	23524.5	20388.1	23969.7	27935.8	24940.9	28914.1	25750.2	25993.1	20388.1	28846.7	29474.2	22391.5	22108	27086	23544.6	22674.6	22795.9	24111.1	18607.6	22917.4	20873.7	23362.4	24941	25345.6	23261.3	24940.9	21925.9	20529.6	21379.7	22108.1	22391.3	24151.7	25062.3
26418.1	24900.6	34230.7	32793.4	31943.4	29130	32854.2	27328.8	30870.5	27976.8	30728.8	28320.7	24677.8	27207.7	21986.5	22472.3	28502.9	30720.5	22573.5	28846.7	28947.9	26539.7	26989.3	24353.8	19093.2	20530	20833.3	26863.8	23423.3	23038.7	22998.3	18911.4	29089.7	27146.7	23726.7	24698.1	26762.3	26681.2	18830.3	23807.8	23524.5	22452.3	32906	25001.7	21966.5	26053.8	18445.9	25831.3	21440.4	17312.7
25386.4	33420.9	31801.8	24455.2	28118.1	28340.7	33906.7	25953	22856.8	23483.8	24819.4	24475.4	25851.7	26701.6	22856.9	23119.8	22310.5	24880.5	27996.6	31801.7	24637.6	21420.1	24938.8	16624.9	28665.2	22067.6	23747	19194.4	23605.3	23969.6	24030.4	23747.2	18567.2	25649.2	22614	24455.2	21440.2	22350.8	24718.2	22514.4	18708.8	20712.4	33421	24758.9	21440.3	21764	15431.6	17211.8	24030.3	23200.9
18992.1	24840	30405.1	28907.6	25973	25588.5	27693.6	23119.8	27369.2	28340.7	23281.5	21399.6	22593.7	21703.5	26458.6	26944.1	24617.1	20044.2	24698.2	27349.1	22593.4	25406.5	25316.4	18506.5	20671.3	26337.3	21501.1	21217.6	19781.1	18567.3	19234.7	18000.6	25386.3	24030.1	21683	24455.3	26235.8	29211.1	30344.3	24779	19679.8	21541.4	19153.7	20590.5	19336.2	26155.2	18627.9	21561.8	25811	22735.2
27814.5	26782.2	27106.2	24920.6	22694.9	33299.9	24232.8	22027.2	26458.8	24293.4	20833.3	24455.2	25285.1	25365.8	21521.2	26236.1	27450.4	24799.3	23807.7	22795.9	22807.2	24030.1	18653.8	21925.9	23099.5	21541.4	20388.1	23989.9	29271.9	20631	20691.7	21581.9	19720.4	19679.9	21521.2	23908.8	22067.5	26580	23281.6	23038.7	24536.2	24536.1	24131.4	20570.2	21035.5	19740.7	18364.7	22998.5	25203.9	24669.1
25365.9	22574.1	26236	21986.6	20307	23908.9	26236.1	26822.7	31093.4	25123.2	25588.3	27915.6	25689.6	27144	24819.4	23464	17313.2	21925.9	21055.8	22087.9	28907.6	23463.6	22888	25143.3	20934.3	18931.5	20772.6	21784.2	20570.3	22836.4	21339.3	21662.8	22917.5	24880	25811.1	23301.9	26276.3	21359.3	18931.4	23686.2	22796.1	20003.7	20044.2	20165.6	20651.1	21238.1	20246.6	27308.6	24475.5	23747
19578.8	24131.3	25102.7	24859.8	26843	24435	28988.5	28725.2	25790.8	23949.4	25224.3	23483.9	24657.6	22411.4	23585.1	21197.4	21035.5	23119.7	25264.7	24961	24272.9	21561.8	21647	19619.3	19882.2	21197.5	24030.2	23023.4	22249.6	20671.4	23160.1	21683	22917.4	23585.2	21683.2	21055.9	18850.5	20064.2	23261.5	20205.8	20327.4	20367.9	22593.6	26782.6	26843.1	24840	25831.3	21804.5	24677.9	23585.1
30141.7	26357.5	26984.8	26559.7	21055.8	20185.7	24880.2	23038.8	24050.4	31579.2	24131.4	22654.2	24961.4	24839.5	19437.2	27288.5	25770.5	24354	21238	26964.5	24940.9	19922.9	24920.6	25709.8	20893.8	24637.4	20185.8	19396.6	19214.7	25588.5	23828.1	21298.5	23180.4	19902.5	18405.3	25487.4	25811	22836.5	20104.9	20630.9	18385.1	17798.4	24819.5	21682.9	24374.4	26924.2	22897.1	23079.4	27248	22998.3
22067.5	21177.4	26155	27936	29069.3	23747.2	25123	22189	21804.3	24414.6	23301.9	21622.3	22108.1	23625.5	20590.3	22694.8	20428.5	21096.1	19963.2	21905.8	26195.6	22087.6	21665	21561.6	20893.8	23382.7	20954.7	18041.3	18324.3	22856.8	22006.9	21399.8	24576.8	23382.9	19214.6	23302	21136.5	22371	21460.5	20428.5	20772.4	21602.1	21541.6	21642.4	19012.3	21501	25547.8	22715.1	23362.5	22816.1
26903.6	22189	24414.9	23544.8	23160.2	19902.4	26519.1	22694.9	19255.1	22735.3	25548.6	19922.8	21420.1	26094.3	21208.8	21015.4	24799.2	24758.7	22269.9	24172	23180.3	18648.2	21881.1	25265.1	18708.9	19781.3	25183.6	22168.7	20125	29089.5	22573.3	21561.8	23241.2	21035.6	19032.5	22714.9	22917.4	18668.3	21865.2	21946.3	18445.7	20995.1	21278.4	20185.8	20529.9	22755.5	21055.6	18101.7	22431.5	27288.3
22876.9	21662.8	23909	26256.5	27490.7	22431.6	21440.1	21642.9	19761	25588.2	25972.9	25163.5	22816.1	26397.9	21986.6	21723.4	21581.9	20104.8	19659.8	24536.2	23625.6	23180.6	21863	18688.6	22168.6	22836.3	21925.7	18789.8	22613.8	24070.7	21359.1	23868.3	22047.3	18445.6	21379.7	20873.6	21460.4	20792.8	18324.3	19295.5	19679.9	19194.4	24030.3	21662.8	20125.1	25446.8	22694.8	20691.6	21865.1	22431.8
20792.8	17454.3	22168.7	30142.2	26397.8	20529.7	26215.8	24232.6	20590.6	23949.3	22836.4	17555.4	21966.4	22958	22370.9	21743.8	21217.7	23929.1	19922.8	24475.8	22856.6	20549.9	22978.3	25163.5	21602.2	20550.3	22957.7	20712	18405.3	20428.6	21015.3	20408.1	24090.9	25042.1	19214.5	19599	18122	19396.8	15350.5	20165.7	20044.1	19376.3	24435.1	20367.8	20145.4	22027	20408.4	17616.1	21400	25487.4
22269.8	20934.4	22816.1	21642.5	22168.8	24111.4	22755.5	23362.5	21703.4	22391.1	21055.9	21339	22694.8	22593.6	20266.8	20125.1	22816.2	23726.8	20428.5	21602	23038.6	18931.3	21467.2	21035.6	20550	22290	22027	22108.1	19659.7	21885.4	21703.3	20003.6	20286.9	21197.4	20732.1	18081.7	20307.2	17859	18628	21581.9	21217.7	20165.5	22694.8	21824.7	21338.9	22472.1	22087.8	20570	20469	18587.4
21925.7	25851.8	22310.3	23807.6	23544.8	21905.4	23301.8	21116.5	24090.8	21845.2	24859.8	21440.1	21885.4	20286.9	22492.4	22593.5	21278.4	20448.8	21379.7	21298.5	23038.8	22431.7	18949.2	21642.7	18850.4	19740.7	24475.4	24313.7	17940.1	20347.6	22330.6	20206	17454.5	17899.3	17980.6	19234.8	17211.6	19720.4	18223.2	21521.2	22533	22047.4	22006.6	23747.2	20529.7	19659.6	20853.4	20873.6	21055.8	18992
21804.6	25507.5	27106	25911.9	25507.4	20388.1	19659.6	20873.6	21743.7	24698.2	20347.7	25325.3	23767.2	19518.1	20206	21885.4	21015.5	21136.8	21298.7	20145.5	21420	20367.8	22420.4	21258.1	20368	18162.6	19680	23929.1	21541.6	18567.1	23747.2	18991.9	16645.2	16078.7	19234.8	18971.9	17171.2	21298.7	19538.4	21136.7	24617.3	22189	21157	23119.7	19942.8	17211.6	18405.3	18789.7	20165.6	18465.9
21784.2	21339	25082.6	25082.4	24697.9	24284.4	21683.2	19133.8	23382.9	21642.7	19801.4	21602.2	23099.5	20995.1	20489.5	25790.7	25224.2	23200.6	22370.9	24091.1	21824.7	21278.4	19488.9	19376.5	21460.7	22715.1	19356.5	16968.9	18931.3	16685.6	17555.8	20469.1	18243.4	17171.1	18101.7	18000.8	20044.2	24151.6	22836.5	18789.9	19983.4	24050.6	19862.2	19052.7	20286.9	21399.8	19153.9	22512.7	23119.7	20873.8
19882.3	25628.8	24941	22108	25831.4	23241.2	20752.4	20671.5	19381.5	20003.7	20469.1	26215.8	23342.2	27450.2	20873.9	20894.1	19983.4	22836.4	24111.3	21257.9	21217.8	21622.3	19776.5	19133.7	19740.5	17555.5	20995.3	35208.2	32208.2	19477.7	21035.6	18951.5	17919.9	22047.2	23403.1	23382.8	21096.3	19907.8	19882.2	18627.7	20347.8	17717.4	19983.4	20125.2	17940.1	17980.3	19922.7	20570.2	20995.3	18971.8
24637.3	23160.2	20024.1	21905.8	20711.8	25426.6	22978	21602.2	19194.5	23625.5	23625.5	20792.8	22694.9	26397.9	22593.6	21339.4	22350.7	21156.9	20853.6	22067.8	20954.7	22532.9	18859.5	19781.1	19295.5	17151	18790	19457.5	27268.5	23666.3	18769.5	18364.6	22775.9	21379.6	19760.9	23241.1	21662.8	21561.7	18364.9	20529.6	18041.2	17656.8	19052.7	15087.4	15031.7	20914.4	19194.5	17090.2	17333	17535.4
208
27793.1	45235.4	36843.8	23114.5	23114.5	20002.5	28470.6	19137.2	15923	17591.9	17406.3	20992.1	24705.5	25031.1	24515.9	17983.2	24929.3	16458.5	17076.7	17201.4	12667.6	16128.9	21319.8	12440.9	25711.9	15860.8	15944	14933.9	15861	13223.8	12976.4	13514.2	13265.1	13203.5	13513.1	13903.4	15304.6	14872.1	11637.4	13677.2	15945.3	15861.3	100260	82206.6	56493.7	13244.5	13491.5	11946.5	26198.4	89837
62810.6	49153.9	27258.2	25011.1	19508.2	26329.6	20827.1	19116.5	17323.8	17159.2	16912	14254	14006.6	25979.9	56417.4	40863.6	34740.2	22908.4	17220.9	19632	15696.2	15861	43730.4	116481	132957	81614.1	259133	1.27787e+06	784093	528322	228831	107521	65679.7	41628.2	28329.3	26144.7	17180	20188.4	12296.4	12585	13264.9	12584.9	16767.5	25793.9	20026.2	14398.3	13182.4	9783.36	13223.9	13532.7
224030	119504	71063.3	43317.4	42100.8	30287.1	43379.3	39090.2	26514.9	26020.7	20868.4	23815	23691.4	21836.7	28349.7	28040.3	26040.9	22393.2	28143.3	41859.4	127402	94067.2	209042	198325	140401	86736.4	47443.4	29937	30019.5	27442.8	19219.6	16293.6	17365	13965.4	13965.4	14006.6	14707	18148	13965.8	30163.6	68355.3	103361	51485.9	30513.6	25196.1	17385.7	64838	881804	622464	531385
62336.2	42184.7	28308.9	40534.1	33462.1	25814.4	28679.4	23197.1	37966.6	26432.6	17797.8	148422	520091	466496	181739	97557.8	82260.2	81347.9	41895.2	113018	1.85893e+06	1.87776e+06	647907	315869	142116	64714.9	26474.3	25340.6	21548.1	26885.9	113866	1.56757e+06	708179	274329	114253	60934.7	71375.6	44330.8	29215.1	17921.4	17818.4	18684	19034.1	20085.1	16602.7	15964	13388.6	13470.8	19508.3	19487.5
28390.8	32969.1	91400.5	58169.1	43894.9	36183.1	30988.8	19941.6	20229.7	23032.2	104677	82711.4	183443	637783	287339	112682	73667.2	1.11317e+06	2.05823e+06	746711	355247	75408.9	210958	177038	81946.4	151973	93601.3	45772.6	34102.5	27154.2	24804.6	16087.7	59133	64440.4	46125.2	25155	17056	13491.6	18848.7	611739	1.311e+06	625327	411543	1.06715e+06	899947	319055	117522	54846.9	69510.4	668578
177025	168196	144289	312204	120704	70861.3	44864.7	29235.9	36867.5	40616	40348.6	52104.5	81702.9	60976.7	43482.3	62006	32782.6	611890	813930	483472	206538	109096	38410.9	30885.6	25958.9	23567.9	26700.8	29978.1	28555.7	27731.1	25030.9	27277.7	29668.6	23774.2	34204.7	37791.8	29916.1	33915.7	123169	559992	240431	115697	194275	75815	45916.4	38616.2	32224.7	34760.3	32360.5	21631.2
411296	347053	171317	212393	127041	49609.5	27813.8	22249	22145.7	24474.6	16170	18972.3	18622.2	170642	1.9868e+06	486162	142455	83249.3	37317.2	25567.1	31627.7	26185.4	17926	24681	22166.5	20188.1	25958.6	25896.6	97868.5	1.71575e+06	1.07695e+06	294611	102479	64110.2	48370.2	25958.9	24433.3	28905.9	35429.3	772308	490234	189194	302402	135665	70551.2	43647.3	30596.8	25505	912387	623657
57880.3	55837.8	34637.3	24248.7	37853.5	34039.3	27854.8	24557.3	19075.4	22146.3	20868.1	36412.7	260414	1.525e+06	1.40973e+06	769995	504419	298785	199851	164359	135675	323603	299440	212788	163186	136825	99135.6	50329.1	51257.8	51340	37400.5	23176.1	22166.6	18704.4	22434.4	39796.6	42339.1	111364	51156	41935.9	25381.6	30699.8	28102.2	26989.3	25051.8	21692.5	21919.1	21424.5	17117.7	16334.9
32920.4	29262.6	23898.2	28926.8	27545.5	23959.4	22599.1	23547.2	34102.5	30101.4	31751.1	56971.7	57797	1.73965e+06	2.84218e+06	1.28416e+06	244233	89338.9	77216.8	75937.2	56250	35298.1	42603.9	20641.8	380855	263949	77428.5	33091.7	20993.1	31483.2	249680	531258	142205	60629.5	23732.7	24268.5	19549.3	24083.1	16685.2	25896.7	392686	2.13043e+06	370422	553334	221625	159973	51363.8	26206.1	440147	532478
19796.5	19796.6	24742.7	25546.6	28246.5	27340	27175.1	37008	63656.7	47422.3	42847.2	82169.6	60810.5	37811.7	32430.8	31544.7	22743.7	21939.9	23321.1	23155.8	22310.6	22640.5	22651.9	24598.5	32678.6	31874.5	22042.6	20064.5	22208.6	28926.6	26618.2	41049.7	19920.2	19590.3	20394.2	21713	23032.3	36535.7	39729.3	38513.3	34409.9	31668.1	28885.3	28515.2	36701.9	33606	27545.8	28122.9	20971.4	16582
17200.2	20662	19013.5	30905.7	64673.8	49091.9	33709.6	23485.2	24495.3	32887.4	64379.3	37317.7	49766.1	161321	121503	1.38508e+06	1.64619e+06	1.2176e+06	360117	136414	59036.6	38802.2	24264.2	24021.3	76517.9	105239	79550.2	35544.6	20559.1	25402.2	25216.6	22269.6	25711.2	26576.8	27937.4	24474.7	21774.7	25463.8	45751.6	28246.7	19034.1	17818.2	20229.5	88404.2	231889	55492.5	42266.6	22290.1	18890.2	15881.7
35358.7	35956.1	27628.2	27071.4	30349.9	26185.1	28885.7	29586.2	21260.4	26474	32431.3	71211.5	42307.2	40005	116023	1.69235e+06	2.14437e+06	2.61581e+06	604010	128844	47196.2	28720.4	26096	27236.2	30204.5	252493	240935	107701	84442.1	53423.5	44822.4	32884.3	34306.9	29607.1	311763	453920	119329	43318.8	33606.5	23568	22187.8	68328.9	128140	56684.1	31524.3	31936.2	62337.9	57883.2	29133.2	20579.6
30307.9	43998.3	37564.4	38327	41029.4	27772.8	35215.4	39689	35709.2	49096.9	36739.8	32554.8	202515	212469	123250	76246.1	249201	962107	569250	336701	85959.7	54372.3	48656.6	50948.4	97205	872531	896807	3.70605e+06	2.1493e+06	814209	524884	271304	148951	71216.2	1.68217e+06	2.17782e+06	611742	140569	71416.6	49321.9	32782.1	48744.3	31090.9	20847.4	20085.1	24619.1	20641.5	19054.9	188642	232246
43628.1	58973	381285	1.59959e+06	707090	227493	110744	52434.1	46761.5	53877.4	55218.8	153680	1.10395e+06	568322	190235	97118.6	49856.5	30247.3	64524.6	553612	593432	145330	155455	2.68268e+06	2.05641e+06	1.7437e+06	2.18845e+06	1.2618e+06	222333	106620	550168	317339	99339.8	87071.2	1.19013e+06	1.23511e+06	268654	71853.2	36018.9	26741.8	279338	288944	100617	92045.7	256287	181426	99027.9	106730	191185	49383.8
70632	86712	217003	576959	327566	1.49371e+06	417392	93165.2	43339.1	35420.4	27896	28803	28267.1	40083.2	33317.3	52141	148355	301523	93513.5	49916.6	52474.3	54475.5	60153.9	48823.9	41955.9	35255.2	48617.4	51340.5	464248	198748	73257.8	45214.6	44286.5	44328	60935.5	72187.8	315002	1.25145e+06	421536	223113	1.23452e+06	741862	1.212e+06	2.21617e+06	876223	195918	404452	279571	117003	78952.5
20208.9	20414.7	23568.1	29462.6	304295	1.56982e+06	1.41114e+06	537955	211816	100120	60810.3	45586.9	27278	82010.3	364672	482329	724278	720777	202570	101506	505899	881424	741009	409196	1.12059e+06	1.14299e+06	443974	244973	103633	124723	322593	257910	184671	184957	998642	881573	468433	1.10278e+06	442125	504581	374026	380885	1.31369e+06	336699	67271.8	510832	339454	108023	96649.8	29896.5
32039.6	53015	81717.5	56187.7	54724.7	78143.4	822914	579441	132280	80834.7	1.17934e+06	698360	410760	1.90357e+06	798818	240557	593325	767795	326200	107467	58397.6	53653.2	59812	383880	419585	107510	110559	215364	144564	371151	264610	72352.5	41255.8	49318.9	39152.3	156267	1.33783e+06	1.48306e+06	1.28685e+06	967744	419193	134577	89143.2	1.63563e+06	1.58476e+06	874396	144727	50886.2	44204	43327.9
17221	28521.7	29875.1	32065	32225.5	215260	2.04901e+06	591000	931416	1.65321e+06	811876	895483	985020	325013	107630	51506.6	31276.7	26164.8	76046.1	223685	2.7908e+06	1.75684e+06	564291	248024	397565	1.91652e+06	1.70163e+06	958543	645796	402066	188066	103072	158916	324083	126432	99640	73357.4	67352.5	1.01586e+06	617448	133083	70425.2	64054.6	244857	197115	114127	356297	277083	201927	147013
26391.7	26577.3	26723.1	34988	343521	400375	78732	56731.3	57408.4	69809.7	53630	214615	296123	262988	168227	1.99454e+06	5.19866e+06	2.20875e+06	414968	633693	2.895e+06	4.68447e+06	2.693e+06	790030	333293	112847	55837	64359	1.03089e+06	712371	163678	60068.7	41008.1	34122.7	514954	487653	620723	1.38946e+06	476998	288646	327680	209403	66961.6	44925.7	40450.9	42926	26803.8	28823.4	165649	926194
915909	965245	427678	179908	72035.9	60370.9	42637.1	40678.1	51196.3	50372.3	71784	94931.9	110324	391593	208214	1.77713e+06	1.67147e+06	746860	538137	256535	121286	59303.9	46273.5	49011.7	85505.2	116295	350354	183715	689641	1.00004e+06	1.08723e+06	307899	111366	52723.2	52908.9	50453.1	68825.2	49031.6	25917.2	99757.9	102013	40286.5	354635	1.21472e+06	281417	72610	33193.6	35049.1	37981.2	103832
22043.3	23279.3	23588.3	20353.1	21672	22125.1	23897.5	23567.8	28824.7	28041.1	25051.6	36683.8	85500	53879.2	50721.2	31338.4	25958.5	25979.4	28555.6	39958	1.24604e+06	806169	167918	75400.2	56869.7	46493.5	751458	2.31337e+06	698545	817235	202101	64448.7	35255.3	30575.6	26473.8	31812.6	22805.3	24866.2	24186.9	22867.1	74342.2	409562	587007	1.28655e+06	529078	127407	44330.7	28287.6	29029.8	117187
25855.4	25443.3	24495.1	24948.4	26907.6	31750.6	34657.6	21877.9	26618.2	27339.3	21094.9	29239.1	494716	348328	100159	1.10361e+06	1.31892e+06	403303	111329	68051.4	430244	696337	880391	422552	400945	123679	198109	127205	66605.3	205789	62256.2	31297.1	384281	233168	53673.3	39358	31235.4	33773.7	26782.8	36368.9	34142.1	41071.7	170640	64857.4	34657.2	203761	186114	62294.9	288365	518432
499195	187608	95058	135885	1.05675e+06	275525	70201.2	33751.2	26515.1	29874.7	37214.4	28638	25897	91758.6	625412	418612	103592	50846.1	47092.9	44082.4	51918.1	39626	35881.3	29256.2	26844.7	97369.4	77009.8	49258.3	36371	41049.2	45854.4	37461.5	168582	1.41638e+06	416923	118957	35833.5	28184.5	23362	28060.8	26082.3	27710.4	27319	94146.5	978916	277207	135722	364177	106353	47690.4
51217	34307.5	28019.8	25938	21507.1	21094.7	27875.4	23217.4	20641.5	24041.8	27525.2	31441.4	26618	76141.2	1.46802e+06	734265	165333	61420.7	39647.3	167643	737870	189842	56486.9	38822.6	27236.9	87656.1	635379	178307	54456.8	40306.7	37543.7	45049.2	33564.6	21259.7	21960.3	22022.1	23279.3	23774.1	506233	387914	82526.4	53980.2	49917	30761.8	23361.7	20518	20785.8	18354	19982	20888.8
22599.4	23217.2	22887.7	26350.2	40865.4	37709.6	1.02802e+06	600579	127170	59055.9	37523.2	30266.4	25402	27133.3	23259	23629.5	26453.7	22434.4	25443.1	55131.6	618209	433150	112215	47299.1	159578	60524.8	64154.1	29277.3	21754.3	25176.2	21197.8	22681.6	32580.3	131042	69935.9	31688.8	28246.2	23815.8	17200.2	20353.2	19302.1	17736.3	20456.1	19240.5	16849.9	24990.3	22619.9	22867.4	24041.7	22084.1
18333.5	22990.7	26226.7	30472.9	26618	20847.4	23856.4	22083.8	20229.4	27731.2	27195.3	22351.9	68427.8	54312.4	31503.5	144338	1.31796e+06	539873	138781	146971	352447	117376	62026.5	37832.2	25917.5	22661	24227.2	20868.2	21135.8	43563.5	152148	49733.3	29297.5	26226.6	17550.6	16190.5	16746.8	15613.7	15016.2	17385.5	19569.9	14995.6	19796.6	18910.3	17365.2	20909.5	655129	1.37613e+06	528161	138165
51919.9	29298.1	22248.8	19075.2	21135.9	27030.6	21362.7	19961.5	130281	74581.2	29318.4	22970.4	43660.6	460132	235429	67728.9	34265.8	28699.9	159902	1.87591e+06	1.8359e+06	488110	197628	829400	173121	50351.6	28968.1	32163	314107	385747	77192.7	26391.7	21486.2	21816.3	19899.8	14501.1	16808.8	14295.1	14459.9	210128	127053	223491	105539	72328.2	200621	50952.2	428534	526491	1.03729e+06	652058
25011	27401.3	25484.7	26061.6	24887	24248.2	24474.7	21877.9	25340.4	24722	25855.5	26020.2	24412.7	333747	822053	232017	90969.6	129952	202688	416207	478393	186113	58395.4	31833.1	28638.1	60785.1	1.19315e+06	426630	82865	32575.6	24021.3	23465.2	52296.2	438730	196211	57882.1	32740.3	27586.8	29923	41631.4	46865.5	36595.8	52586.3	55259.7	57591.2	257330	90790.9	305751	1.55207e+06	428439
20868.5	22990.7	25670	22578.7	25113.5	21465.8	21548.1	24495.4	25958.4	107248	86519.2	38122.3	23052.6	20126.4	20909.5	852626	2.40728e+06	657067	113553	45587.9	964140	4.03652e+06	2.06516e+06	301789	579227	298923	92021.1	58603.5	341468	164495	192395	46310.7	22867.2	39255.3	27855.1	22269.6	15201.9	18601.5	18663.1	18477.9	21280.4	21280.4	21980.9	26968.4	57005.1	549422	134218	37234.5	23938.9	30679.8
22414	22084.1	31318.6	43863.7	3.27517e+06	1.82816e+06	302015	82921.5	55116.1	42966.9	26721.2	139068	1.66443e+06	1.95386e+06	1.66112e+06	676679	997092	653208	180057	109723	81635	139510	85315.9	36884.7	275606	259950	69710	247623	539266	442793	133423	67701.4	31319	18972.1	17427	15613.7	15139.8	19508	22166.5	40517	47216.3	34410	33965	37812	34905	25958.5	306502	1.03386e+06	299744	69707.3
34059.5	41276	49195.2	35255.2	29916	295170	318645	1.70265e+06	3.5176e+06	1.05454e+06	244489	86861.4	45339.5	39110.8	641496	1.37593e+06	894238	851649	379896	83649	37400.3	33010.2	529598	317511	78383.2	34287.8	27215.9	30637.9	28184.6	22331.4	25673.1	19508.1	22084.2	22681.8	23238.4	23506	374049	472566	84482	373954	1.14709e+06	279347	156171	590099	616549	136329	114642	81142.6	37545.6	421351
56230.7	43997.8	46928.8	76629.5	56975.2	77361.6	62281.2	197599	203103	226643	71954.2	47360.7	37997.8	47318.9	31606.5	31875.7	83064	1.43981e+06	1.54179e+06	527221	96069.2	43957.1	499118	165723	41793.3	231675	272902	70245.4	36245.7	32041.4	30452.7	676195	1.48651e+06	274488	89201.1	94270	131483	259574	115344	95226.2	42844.9	37009.1	312997	118001	131168	46497.6	29898.8	26804.4	20786.5	47021.8
207
10921.1	20659.6	14808.1	10818.7	9755.07	8486.91	9387.49	7893.73	5991.57	7730.1	6277.83	8486.91	10103	11268.9	10266.6	6830.13	8671.13	7300.55	6421.12	6278.02	5889.35	6380.24	5253.12	4334.92	10696.3	6727.91	6298.48	6175.73	5807.41	6830.31	6093.79	5746.37	4866.63	4294.04	4682.77	5235.01	5378.05	5684.9	4580.49	4294.1	5009.97	6114.39	40949.4	35050.9	8486.91	5930.29	5071.32	3885.03	10943.4	38816
26512.3	20332.2	10041.7	10614.3	8466.5	11391.5	8364.21	8139.05	7014.11	6932.48	7505.12	6093.98	6093.85	9121.33	23852.4	16628.8	12864.5	9243.77	7709.57	7955.02	6441.59	5950.82	15692.9	48315.8	50547.9	32939.6	97452.5	506518	324823	221187	98930.7	44016.9	25899.4	19679.2	12046.3	10389.6	7464.37	7873.26	4703.18	5582.56	6196.14	5398.46	6543.93	8139.11	5725.72	5807.59	5193.83	5030.38	4396.51	6073.63
90899.7	46145.7	28640.6	19616	18224.6	13621.5	17303.9	17038.1	11678	11575.7	7280.15	9223.24	10245.9	10921.1	11432.6	12107.5	10225.7	9755.14	9571.03	12967	48971	36726.6	85836.5	77880	56897.2	37709.5	18940.8	12025.6	11166.5	10409.8	8057.42	6584.69	6277.95	5889.23	4968.91	5971.1	6114.39	7157.33	5930.16	10593.9	24794.9	40083.3	18327	13703	10000.6	7157.39	17863	362107	257297	203558
25591.5	16444.8	11248.5	15810.5	13109.8	10430.2	12209.8	8302.87	9059.61	10368.7	7893.73	49817.1	214815	198877	72394.2	37749.7	41605.1	31670.7	17099.4	46649.3	730049	769077	276616	127249	60505	25080.6	11596.3	9264.24	8302.93	11064.2	38774.8	597230	299941	113396	47640.6	25325.4	28272.2	19002.4	12250.8	8364.4	7014.41	7178.05	6932.35	8180.05	7136.98	6809.85	4744.12	5132.48	8159.58	7955.2
12005.3	13949.4	36807.8	23299.2	16997	14153.2	13007.8	8118.89	7136.98	8425.5	38713.9	34045.1	67193.2	261551	115517	44405.2	26982.8	440187	842439	298311	147010	31876.5	79828.6	66672	32039	58860.8	38612.6	17488.2	12414.5	11371.2	10123.3	6298.42	23424.5	24486.2	18225	10696.1	7975.79	6257.55	9489.22	229662	549857	259852	165401	405330	355178	120830	47600.3	22664.9	27420	271316
69559.1	71079.3	56879.6	121022	47293.2	26962.5	16853.8	13253.3	15442.1	18020.2	15462.4	20270.8	30564.9	23258.7	20926.9	22972.1	12823.7	243051	334521	199175	81795.8	45205.4	16526.5	11289.2	11227.9	7996.08	10450.7	12475.9	11473.5	11698.4	11411.9	12332.7	12148.4	9857.42	14071.6	15073.9	11473.3	13232.7	50424	220540	90850.1	48586.5	77518	34087.2	18879.3	20251.3	12741.7	14235	9100.55	9714.26
159235	142092	70834.1	83496.6	51593.6	18511	11166.4	10225.6	9243.71	11166.6	6114.39	8077.89	8507.44	60208.7	478745	203326	61803.2	32755.6	15237.7	8896.1	11166.6	12128	6562	9796.2	8630.07	9346.06	9591.44	10225.7	32370.8	661429	440579	129449	40985.3	27475.1	18102	11166.7	10614.2	11002.9	11269	313872	202141	73638.2	118214	55302.1	29255.4	19759.3	12721.3	11043.8	346890	253599
23994.8	23074.6	12700.7	10716.6	15012.2	13191.8	12230.1	8936.98	8057.24	8220.99	9632.26	13621.7	95917.9	649548	588571	329897	196204	119110	82843	55381.7	59561.6	127525	122798	82574.4	62674.9	58515.4	39614	20086.7	20884.8	20700.6	14501	10511.9	8773.29	7177.92	8037.07	14378.3	13539.5	46581.6	25166	16301.4	10757.4	12884.9	11534.8	10777.8	10389.2	10451.8	10123.3	8855.04	7280.09	6196.08
9918.89	11064.2	9448.22	10634.8	12046.2	10082.5	8875.76	10471.2	11616.5	14031.8	16468.3	20536.9	25243.4	656576	1.14717e+06	527166	105918	36155.2	30216.9	29848.1	23749.5	15503.5	9907.5	8916.64	146701	99877.5	33186	14460.6	9039.39	10532.7	97729.5	217616	54545.2	25612.5	10123.5	12210	7607.53	8998.2	7198.39	10368.8	154747	855823	153079	210004	92430.4	64667.6	21663.3	11698.4	177033	225807
8630.13	9816.54	9734.67	11227.9	11330.3	10307.4	12415	15115.1	25898.6	19206.6	15361	34719.6	24895.3	14664.7	13662.3	12475.8	8568.6	8630.13	9918.76	8507.37	9161.96	10082.4	10289.3	7975.61	12721.2	11923.4	8793.76	7361.96	8712	12066.7	12416.1	15217.4	7668.81	7484.65	7280.15	8773.29	8466.38	12353	16587.8	16485.5	12373.5	13764.6	13805.6	11207.5	14582.9	12721.2	10286.9	10246.1	8711.94	5582.56
6891.66	8425.5	7852.85	12005.5	25183.2	20659.9	12619	9305.06	10102.7	13621.8	24670.2	15012.5	18205.9	63125.8	48541.7	530837	649120	501047	146357	55571.6	23545.7	16792.5	9380.06	8998.14	30074.2	42929.9	30094.1	14501.1	8036.83	9673.44	10757.4	7730.1	9837.07	11084.7	11084.7	10123.2	8609.78	9857.3	16997.4	10982.5	8671.07	7034.76	9100.55	32568.5	99527.8	21131	17263.1	9039.27	7484.72	8425.87
13150.8	12639.6	10777.9	11944	11882.5	10123.3	11718.8	11821.2	8773.29	10205	13969.2	29501	19022.6	14562.4	39982.8	684200	844299	1.06346e+06	260691	56310.2	18122.5	11330	10398.3	10266.5	11781	99701.3	98802.5	42172.6	33061.7	22562.3	17201.7	13416.8	12537.1	12823.6	127315	192012	44162.8	18204.2	13335.1	9509.38	8773.29	27664.4	46924	22787.9	12209.8	12680.1	23958.6	23750.3	12046.3	7893.73
12864.5	15953.5	16485.5	15748.9	15380.9	12926	14665	14849.1	14889.8	15462.7	15708.1	12619.1	81289.6	82450.4	51082.3	29091	92492.3	392761	244836	144539	32798	22931	18817.9	21785.1	39050.2	343663	366098	1.44669e+06	876607	345207	206637	116662	63330.1	27741.6	671169	902134	257682	56762.2	29070.6	20025.6	13908.4	20189.7	11146.1	9121.02	7791.51	9980.11	8548.31	7832.38	70026.2	95949.7
17386.1	25468.4	90210.5	643175	302667	89903.8	46555.2	24158.7	17958.8	21273.5	19554.6	70936.6	442959	233771	79372.4	37831.4	20189.1	10839.3	24649.9	212156	234781	58622	53177	1.03982e+06	842755	735841	860421	535939	89338	41929.1	223025	133075	45776.8	37445.5	466184	520915	110228	30627.6	14358	10409.6	112626	123045	40412.9	35358.6	105754	74929.3	39348.2	39335.3	77213.9	20087
30852.5	35989.6	84605.6	237796	128599	594199	173170	40802.8	16935.9	14869.2	11964.3	11309.7	11698.5	14542.1	14419.1	15912.9	53959.4	120564	38427.9	24447.6	21498.4	22132.8	28376	19738.8	17140.3	15605.7	19841.4	23299.2	177187	85269.1	28436.6	18552	19493.2	18798	20700.6	30873.1	110707	526415	169920	89980	497739	296721	476987	863686	358088	78402.7	157175	115685	49545.3	27044.3
7177.8	8323.27	10982.4	12782.7	110171	650251	568526	213452	86453	39715.5	24977.4	17979.3	10000.6	30336.7	145503	193670	290063	249187	85577.6	39981.7	188865	358695	295984	170984	449321	460141	189331	98763.5	38078	50571.6	128082	103010	76464.8	72950.9	387723	364490	198512	441107	183890	205539	156224	154479	490018	113460	27904.5	202022	136508	45388.9	34866.6	12516.7
12742	20516.9	30544	22521.6	21130.3	32069.6	346951	238861	54732.7	29709.6	444515	275953	159348	790470	336004	88552	226989	385578	131946	46473.9	20782.3	22154.9	25312.5	152667	172399	50723.6	43095.1	87561.2	60669.9	150161	108807	32389.1	16976.7	20986.9	14316.9	58687.6	527670	611237	515825	351125	166086	40903.6	31835.2	659972	636082	361734	59079.1	26167.2	18408.8	11064.4
6993.95	8936.98	12496.8	9468.81	13355.6	80855.9	799930	242161	361744	670876	330546	354253	409970	138549	44835.4	18736.3	16036.8	10246	27690.7	85239.7	1.13475e+06	717803	226682	103117	147159	750904	689243	395142	254236	160471	78018	44670.5	58356.9	131491	53417	41784.1	29746.4	26840.2	414679	251620	57761.8	27862.7	27106.8	95727.1	77884.9	47946.9	146021	116527	79192.2	57768
12025.7	10430.3	10818.8	12680.4	136359	166329	35336.4	18818.1	21703	26471.1	20557.1	86308.8	119132	105686	68887	761680	2.00149e+06	893493	169984	241634	1.04249e+06	1.85709e+06	801097	358341	132651	48708.4	25427.5	26676	396301	297463	65713.8	24711.8	15728.6	14235.2	192198	207253	249074	550164	186775	118286	129384	88541.5	29255.3	18736.4	15708.1	16669.6	11043.8	10512	58256.6	245234
642850	659513	190850	69397.4	30319.5	20618.7	19472.8	16608.4	22194.3	22603.6	30752	38159.4	44220.4	101163	82412.6	713725	574531	293018	219875	103305	49749.8	22092.2	21293.7	20209.5	35419.1	45571.4	142732	73110.6	268142	387548	460280	115709	37197.6	25100.6	18920.4	20782.1	28008.3	19882.5	10450.6	38182.6	41764.8	18102.3	127630	498737	114648	27147.4	13294	13764.5	12803.1	39389.6
7321.15	8589.13	9264.24	9550.57	9121.08	7239.21	9918.89	9509.63	10982.4	9202.9	9530.16	16406.3	31608.7	24240.9	18797.4	13212.3	12393.8	9591.38	11412	15279	501879	339744	71597.4	28190.4	22214.7	16915.2	268469	888243	297194	327571	79045	26369.5	14746.5	11637.1	10736.9	13498.8	9407.41	10082.4	9018.74	9529.97	24759.4	159013	233495	502690	226876	50573.1	16158.2	12005.2	12148.3	43444.1
10102.9	10061.9	8691.48	10225.6	8671.07	13600.9	13805.6	9837.13	10982.8	15710	9939.11	10716.8	199991	150148	39861.2	422498	544204	170610	46331.6	28845.2	164839	268419	360500	175041	159864	53296.3	79693.5	49753.5	25512.3	82338.1	26922.4	12291.7	145255	96075.7	23361.6	16178.6	15053.8	11003	11207.5	13887.3	14235.2	17939.1	67122.2	26758.4	12946.2	76941.4	75513.7	25612.3	114229	194801
200441	81102.2	42173.4	45766.5	420547	138137	29542.1	13600.8	11084.8	11964.5	16178.6	11391.4	11248.3	33751.4	239616	172492	42524	19718.8	16710.8	16444.6	21273.4	16853.8	14198.8	11268.9	12128.1	37287.1	32407	20393.9	14051	16956.1	42617.9	15360.2	64518	581169	165798	35848.3	14214.8	10021	10430.2	12210	9979.93	10982.5	10491.3	40520.7	386384	108479	50536.8	151941	43732.3	19881.8
19452.5	14685.1	10900.7	10737	8957.39	8405.15	10532.3	9223.37	9243.83	9591.5	11637.1	12393.9	10818.7	25559.3	512557	314053	70327.4	26267.9	15298.9	50321.1	290575	80049.5	22310.5	16137.8	11166.6	33985.2	259900	67975.2	21457.7	19329.6	14480.4	16465.1	13273.5	9325.59	8896.17	8711.94	9550.57	9366.47	200540	157285	35847.5	22112.6	20495.8	12250.7	8241.64	7873.44	7914.38	7341.55	6789.25	7566.47
9345.94	8936.8	9550.57	10941.7	16936.2	15135.3	402309	254489	53258.4	25489.2	16976.8	12455.3	10982.5	12516.7	8834.51	9264.18	10778	8712	10286.9	20497.6	246950	170259	45057.9	15565.1	64686.4	25101	26512.5	11555.2	11146.1	9693.79	9387.06	8179.99	12231	52801.5	30463.4	14910.3	10778	9673.32	7402.9	7914.14	6953.01	6809.72	7955.14	7996.08	7791.51	10491.5	8998.39	9468.81	10102.7	8691.54
8384.62	8364.27	9243.77	13171.1	10675.5	8405.27	10205	8957.45	7607.35	10491.5	10327.9	10000.6	25428	21785.2	11453	51253.2	519344	228905	56305.1	57553.6	147805	46493.9	24602.4	15319.4	9407.41	8671.07	9918.7	9161.9	8425.56	16570	61635.5	21007.7	13294.2	8609.54	6298.3	6053.04	6789.44	7443.78	5705.49	7177.86	6973.35	5766.59	7587.06	7096.11	6871.13	9141.43	240405	555899	220797	57949.6
22235.6	11412.1	9018.67	8895.98	8282.34	10389.3	7975.61	7341.55	48426.9	28867.1	11473.6	9837.01	17817.5	180080	103416	26514.4	14071.4	10675.5	55834.8	747708	745768	207761	76838.5	339011	77020.4	20414.5	11555.2	14726.1	112961	161795	31488	11146.1	10123.3	9182.49	7402.96	5766.65	6625.69	5971.1	6318.83	80509.6	53219	89279.9	44101.6	27787.2	87308.8	21786	164658	222423	403003	275420
10512	11227.9	11309.7	9796.01	11330.2	9427.81	9427.87	9325.47	9039.14	10696	10614.3	10552.8	10716.8	119733	359713	93871.6	41747.1	50654.8	67878.5	164663	192189	77746.3	24330.1	12209.8	10941.4	26548.3	469907	170241	33472.8	12332.4	10021.2	9877.95	9816.91	171257	76746.4	24916.3	14091.9	12353	11002.8	16342.8	20189.1	13273.6	18961.3	22623.9	21642.7	102466	37158.3	115707	613926	169374
8875.64	8977.8	11493.9	9509.69	10246	8507.25	8343.75	10736.9	10225.5	43798.9	38489.8	13948.6	7812.04	9469.43	10143.7	333775	969815	275825	42401.6	17283.6	363824	1.53577e+06	886876	125210	224100	124676	35293.4	22563.6	137843	72010.3	79513.4	17999.9	7873.26	16874.3	12312	9243.77	6891.54	7566.53	7628.06	9100.67	8323.34	8711.82	10982.5	10716.5	22100.9	214051	54181.1	13907.9	12743	18049.9
9509.69	8548.25	11657.5	15770.1	1.27435e+06	746104	129313	34784.3	21744.1	17856.4	12803.1	59554.9	649588	802160	664760	270068	397768	266786	76885.2	45632.8	31977.1	55285.1	33045.5	14930.8	107839	108014	25961	94860	210513	181015	54156.6	28375	13048.6	6871.07	10003.7	6707.44	6625.56	8998.39	7484.65	16650.4	20516.6	14357.7	11964.3	14399	13232.9	30568.8	118869	415893	150598	29029.9
13539.5	15585.3	19472.7	13069.1	11944	106791	133338	669893	1.44004e+06	440469	110600	39654.1	19800.3	14705.5	244683	552852	365017	348521	149328	36483.7	14787.4	13478.7	202458	130962	31917.2	14255.9	9182.49	10921	11330.1	9325.53	8200.58	7096.11	8262.05	9775.85	10287	8466.44	144408	168789	34231.5	133247	449804	114139	61440.4	223346	259797	59034.4	46395.7	32632.4	15974.1	165432
23115.3	19206.7	24148.1	18081.5	22378.4	33902	38434.2	79584.8	86050.1	95885.8	30442.5	17713.3	16056.1	17242.8	17082.2	11248.5	30763	580458	627286	214237	38592.1	17774.6	211901	73389.3	17201.6	90724.7	110469	24999.5	14848.9	10859.7	12619.2	246232	597582	114279	30402	34373.6	48496	105298	49957.5	39859.8	19391.9	13764.4	120008	63031.9	19985.7	14913.4	10900.7	12394.3	10962.8	12210.5
206
15857.9	31727.4	24251.2	18580.1	16513	13647.5	15448.6	15898.9	11457.6	13053.9	13074.5	11478.1	14957.4	16103.6	13831.7	13382.2	13545.2	11887.5	12440.1	11273.7	9800.12	11335	14132.1	10639.3	14814.3	11089.4	12153.5	11416.6	11089.3	11334.8	10823.3	9043.06	10455	16051.7	8163.07	10639.2	11252.9	10557.4	8081.34	9186.16	9165.74	11846.9	51848.2	48648.2	14343.4	11273.8	8940.67	9779.77	15943.1	48666
33997.1	27936	14773.5	14609.6	13463.4	17331.7	13790.6	13668	14077.3	12665.2	12767.5	10107	11908	16308.6	34653.2	26502.8	20831.9	16942.9	14077.5	13790.8	11375.9	11723.7	22360.3	62619.1	67087.6	42108.7	716737	612202	392454	271560	123775	62149	38319.1	21241.4	16513.1	17147.7	11744.2	12317.3	10414.3	8879.3	9063.48	10884.8	9881.91	16185.6	8961.27	12112.6	9718.33	7815.25	8756.56	10925.7
114763	60508.3	36886	25560.8	27690.4	21077.7	25704.3	23677.4	18293.7	18887.4	13340.7	16656.1	17638.8	18416.5	20197.4	21937.9	16001.3	16594.9	20238.5	20198	65529.7	52147.3	106359	101671	72479.2	50734.5	29758.5	21241.4	18948.6	20361.6	13238.2	11682.8	11007.4	9493.14	10598.3	11826.1	11764.8	13033.6	11744.3	19112.6	36662.7	54605.3	27895.8	18314.2	16001.3	12849.5	25895.9	734831	311573	254951
34488.6	24435.1	15755.5	25377.1	21793.9	17167.9	20443.2	15366.8	16472.2	19358.1	14343.4	68001.8	257025	244216	98601.4	56476.6	49116.2	43357.8	25049.4	50443.1	831250	941923	329907	164426	78717	32830.4	15407.8	15817	17434	19849.4	47989.8	718616	365810	141270	61861.3	39989.2	39158.6	31665.6	24747	13606.8	11600.9	13360.9	13320	15530.5	11723.8	11130.3	9800.06	9697.73	16226.3	15939.8
18560.2	20648.5	42620.2	34058.6	25376.7	27669.6	20954.7	13606.7	15427.9	15039.2	55900.3	43030.7	75748.5	313251	149714	60508.6	40428.3	500224	1.02778e+06	381493	186876	43504.7	104407	94220.5	46207.4	70716.3	52889	26810.4	19849.4	17720.3	16861	11416.9	32465	32707	28693.7	17700.4	12521.9	10782.4	15407.6	271207	659015	308683	201358	488224	459057	148952	63585.6	37950.7	38798.7	342058
93103.8	86079.3	77199.5	153734	66310	40326.3	28018	24988	25663.9	27997.4	25541	32320.1	44751.4	37930.4	26789.6	33853.8	18867.1	275420	395842	244944	103537	61739.4	24940.2	17802.5	16594.7	15673.7	17986.6	18662.1	20402.3	17433.9	17475	18948.6	18907.8	18171.1	21200.5	26298.3	21527.9	22756.2	61316.1	267700	116445	61641.7	104755	44403.6	28755.6	26830.3	33330.9	21773.6	18805.4	17434.7
194194	176343	95683.4	100582	67909.5	33240.3	20218	16083.2	15715.1	18273.2	13381.6	14322.9	13381.4	70183.2	589373	248659	76855.1	44034.8	23657.1	16328.6	20156.5	21118.6	12858.5	16676.5	16656.4	15735.1	16983.6	16021.7	38056.9	791708	581121	155499	56533.5	40448.8	29144.1	20340.5	17823	22019.5	18273.4	370148	254091	99760.7	143813	78040.1	42948.3	28325.3	22449.1	20852.2	403726	335531
35226.6	32400.8	22756	15551.4	24742	20832	19153.2	16267.2	15571.3	15059.6	15202.9	21856.7	121982	1.54948e+06	710893	414302	232260	149624	111319	67087.3	71722.3	154803	151172	105629	85522.7	74241.3	54054.7	27956.5	32667.3	31212.5	23759.7	15898.8	14711.7	15224	14732.2	21097.9	22920	69462.8	34695.4	30516.3	19480.9	20504.4	21221	19644.8	17495.6	14302.6	18887.5	17781.9	12726.5	15039.2
19869.7	18027.7	16410.5	18948.8	22551.3	17700.1	18457.4	17618.2	19317	22060.3	25439.2	31458.3	36864.7	774166	1.37046e+06	659076	135673	52969.4	45304.9	42969.3	37910.6	23657.1	17170.2	14711.8	180293	132345	47599.4	21630.7	15449.5	21753.5	110118	267545	73923.8	37111.9	15551	18744.1	13565.6	18007.2	11171.3	19133.1	184611	1.09141e+06	202784	263316	121402	85775.9	36497.3	19132.7	195259	281727
15182.6	15776	19030.4	17945.7	18600.8	18314.3	20996.2	25910.1	41821.3	33240.7	22756.7	48091.6	32994	25622.5	21057.3	22224.1	16185.5	14200.1	16983.6	16205.8	13463.3	16901.7	15860.3	15592	22981.7	23759.3	15059.7	12378.7	13545.2	19378.6	18436.9	26851.6	14056.9	14916.5	14957.4	15632.8	15387.2	23493.3	28101.2	25847.6	21077.8	21159.3	20873.1	19317.4	24905.8	23104.2	19337.6	21323.5	19685.5	14916.4
14957.3	14609.4	13381.5	19092	37541.9	27546.8	20074.6	17249.7	15980.9	23698.9	39895.6	25806.9	28041.4	82652.7	68603.7	637677	803675	610077	181465	72138.5	31191.9	24783	16296.8	15039.2	37848.1	57105.4	47393.4	22469.7	16144.4	15469	17556.7	14752.6	19480.8	20545.4	20238.2	16451.6	14752.7	17966.1	25111	22224	14302.5	15591.9	19132.8	42415.6	128990	36128.5	27014.9	18805.7	15285.2	14814
22142.3	18764.5	19992.4	18989.7	17740.9	16246.9	21568.8	20647.9	14056.9	19358.3	21671.2	41739.4	26216.2	23063.3	51461.6	803033	1.05735e+06	1.27401e+06	339925	73306.9	27711.4	19153.7	17079.2	17106.6	18375.6	124012	124853	59115.7	43849.2	33526.2	25602.2	21384.6	21077.6	18948.6	146125	239099	63055.8	27751.7	22592.7	17454.3	16451.4	38714.7	64260.1	33444.6	22797.7	25889.3	32096.1	33814.1	22531.3	14629.8
22838.1	25888.5	24475.9	23493.3	22735.8	18252.9	20914.1	25438.2	24353.2	27936.4	22551.7	20668.4	103075	107290	66064.5	40592	114944	474124	283783	184131	48952.1	36229.4	29617.6	32502.3	51649	403248	439786	1.74228e+06	1.18569e+06	416807	255774	157194	85113	41966.2	748227	1.11601e+06	327070	78868.3	43993.4	29431.4	20893.7	30721.6	21507.4	16144.5	14609.3	18682.4	16594.9	14159.2	85250.1	126045
24435.7	34673.1	101398	789558	368172	113652	59608.5	32195.5	28161.2	33813.2	31068.7	80454	533822	302362	108146	48458.8	30024.8	19030.6	36803.6	257649	334576	83842.2	66867.7	1.19734e+06	1.00917e+06	861349	1.03799e+06	663796	119848	55163	264420	168101	57723.2	44587.3	524684	656747	137797	42498.2	23227.3	17659	137898	149184	54463.1	47152.6	132123	96272.5	55426.8	53427.3	101659	30066.9
39445.9	46922	104404	290305	154319	725708	218710	55942.3	26052.6	23083.7	22490.3	20115.3	28172.6	25212.9	25561.6	25172	70095.4	149052	50244.6	29000.8	32606	32788.7	33876.8	29062.4	26850.8	24271.1	30147.4	35410.8	219723	105766	48357.1	29348.9	30147.9	25990.8	33218.9	40962.8	131085	631539	213662	106437	599270	358323	573152	1.07295e+06	462874	95607.4	209905	145338	67354.4	40715.3
12112.6	13483.8	17782.3	20381.7	133435	774700	705807	270012	114772	53314.6	36147.8	27301.6	16594.7	36044.1	178321	239035	343935	315013	111171	55712.3	225042	436411	362331	196507	538292	565034	237554	124387	54954.9	65290.3	157561	131433	99738.6	92857.1	463817	444358	243262	553081	228426	254737	200260	169116	602349	151258	42518.4	238044	185124	61967	52192.7	21405.5
20238.3	29309.4	46942.7	31150.5	37420.4	39062.9	425396	302557	75439.4	39510.5	534819	342892	205064	906297	718132	114246	283909	384835	159247	61166.7	32236	28284	33896.1	177374	217692	58831	62129.3	103808	79147.6	187520	137675	46166.6	25663.2	31908.8	24783	69487.4	609682	738832	627390	426787	214086	61391.8	49055.1	802725	782051	444244	81170.6	32993.7	30475.8	22592.8
11846.6	15674	17311.2	16165.1	20914.1	94624.8	973389	297831	409043	799512	419066	456418	504838	168601	61493.2	32973.2	20483.9	17004.2	38171.9	109611	1.36347e+06	885246	276664	127804	191247	877207	842236	489477	311366	201383	222040	58765.7	70199.4	181338	72110.4	51408.6	42620.2	40428.6	481563	371353	74061.5	41186.4	44327.9	127947	100611	72255.1	169625	160587	101258	79020
20586.6	16615.3	15571.4	18969.1	155443	210864	46820.7	27014.5	35062.1	37397	28693.6	107369	151396	126980	86429.6	900465	2.43334e+06	1.11682e+06	215968	294545	1.19438e+06	2.32129e+06	976603	387520	176776	63505.2	35840.4	36393.4	473211	370454	88963.6	35164.9	25417.7	21016.2	241608	254410	297776	686531	261709	146374	161384	109863	41370.7	27321.6	22715.2	27342.4	19358.1	21487	73766.2	295183
461520	476957	225870	89422.3	41985.4	31068.9	29677.2	26093.1	33834.6	30229.5	37049.2	51552.3	63567.3	131537	107539	840238	692898	375505	263610	128269	62106.3	36720.8	28653	33403.7	44508	57782.2	184554	98106.4	323698	465406	538202	151531	53212.3	35000.9	31356.4	34243.3	40903	30844.4	16983.6	51986.5	59366.2	25786.4	156603	600085	142265	40760.4	20995.7	24619.4	21814.7	43033
14159.5	14896.3	13299.5	13974.9	16287.9	15366.9	17556.8	16799.6	18907.8	15673.7	16165	23146	46472.7	33117.7	30495.3	20443	18825.9	17782	23065.4	24230.3	591106	438101	93692.7	42333.6	30577.5	26195.7	308269	1.11021e+06	359249	424961	107357	36722.5	23104.3	20688.4	19215.1	21159.6	16001.1	18170.9	17311.2	16963.2	36997.4	195443	290903	612552	267260	70147.8	29902.1	21098	18641.8	56781.7
17413.5	18048.1	16164.9	16594.8	15714.7	19112.5	20361.2	16308.4	15346.2	20197.3	14650.4	19378.7	229280	186418	53730.8	493898	684836	217524	61351.3	41350	196623	321838	443098	209971	205836	71706	98050.3	65678.3	34143.5	110174	37664.6	23493.2	182045	131896	34694.5	24701.1	24025.5	21568.9	18682.8	24803.5	21302.7	26054.2	84990.4	38463.7	23145.5	102069	98074.3	35655.9	135138	245170
255540	96090.4	52105.9	63140.7	524203	146259	37624.1	23760.5	17311.1	19112.4	23657.4	20176.9	18437.3	44029.9	300328	213715	56166.3	31786.1	24332.8	26318.6	32933.3	25254.1	23174.7	21999	19030.4	51563.3	45139.5	31540.8	21425.7	27239.9	30270.3	24680.6	74920.8	697411	215361	58627.3	23145.1	21999	16001.2	21814.6	20668.4	18478	18641.5	43286	472932	146284	64533.9	192707	60101.7	31499.2
32195.7	20484	17904.5	18437.3	16676.7	13790.6	18314.1	16963.3	13688.4	15878.5	20238.5	18743.8	17413.5	36636.9	627553	382952	97165.4	34776.3	25602	64310.1	347192	102501	33494.6	24783	20855.3	35870.4	331091	96318.6	33813.3	27362.7	24148.3	28141	22203.3	17618.2	16185.3	18395.9	17741	17597.8	239120	204890	48810.6	32277	28836.9	18826	16738.1	17106.5	15673.7	13872.7	13872.6	18027.8
17638.8	15858	16819.8	17618.1	30259	24414.5	479839	312254	74265.4	37294.8	25581.7	21527.9	17638.7	19398.9	14548	17454.4	18764.5	16267.4	17536.5	29391.3	301494	210999	60943.6	26626.4	86573.9	37316.2	40593.3	19642	19050.9	15059.8	17045	16594.7	20463.9	67415.9	42600.6	22449.2	21589.7	19153.6	13464.3	14302.5	14200.1	13217.8	16819.9	15980.8	14097.7	18518.9	17720.7	20259	19398.9	16431
13586.2	14691.3	16717.6	20954.8	18641.8	16103.6	16881.2	16144.5	13340.7	18273.2	16901.7	16636	36988.6	36189.1	23292.1	66199.8	652764	287627	75169.7	71197.3	181412	66127.1	37426.9	26462	18784.9	14077.1	19173.8	15858	15100.5	26260.6	78902.3	30536.8	22531.2	20197.2	14527.6	13463.3	13443	13586	11539.5	13135.8	14056.7	12644.8	16942.6	15980.7	15141.4	15428.1	269194	691450	284490	74923.5
31540.8	18396.1	13545.3	12440.1	15817	19010.1	15244	14036.4	66880.5	42682.8	20074.6	17843.3	25399	218127	127589	39488.3	24639.7	18887	66484.6	886366	903223	264628	87064.6	425732	98143.3	30209	19767.3	23636.5	135634	209534	43647.1	18907.8	17966.4	20013.2	14752.8	12092.3	14977.8	11785.2	12706.1	104525	74113.4	114615	58813.9	36564.8	106431	33937.5	195665	286759	479051	347354
16185.4	20525.1	18293.9	18928.2	19706	15530.4	16247	16369.6	16799.2	18252.6	17393.1	17270.2	15837.7	145271	418934	120002	48479.1	62499.3	86710.9	209687	238666	102239	32057.2	20115.4	20258.9	31712.8	578092	217496	48954	21691.7	16472.1	15387.2	18499.8	208478	100554	36332.4	21896.3	20545.2	15837.7	26503.6	31703.7	20995.7	28100.2	34550.2	29554.2	140905	49014.5	115336	773505	227584
13504.4	14240.9	19337.6	17618.3	17863.8	15469.4	14077.5	16062.7	19235.3	54229.9	48912.3	23165.7	16083	15407.7	15407.5	387681	1.65693e+06	346650	65065.8	27649.7	445109	1.85509e+06	1.09e+06	164686	277541	158550	46164	33362.7	169209	82473.6	103767	29595.4	17843.6	26400.6	23616.6	18682.6	12849.5	17085.9	15632.7	16246.7	17822.8	16062.6	17107.1	18027.5	31632	270514	74829.8	25582.2	20177.4	30650.4
15264.4	15059.8	18866.9	22183.2	1.51389e+06	1.00047e+06	166145	44261.5	28632.5	25929.5	19951.6	61525	754534	970296	831438	347333	477196	338856	99756.5	73206.1	47065.5	73369.5	46842.4	23821.1	124565	143191	41883.4	113511	263462	234262	74045.4	41616.6	21671.2	15469	14138.7	12869.9	13627	14998.3	17638.6	23084.7	31110	23165.6	20177.1	24025.8	21507.5	19829	134099	526080	165112	40880.2
24537.5	23227.2	27976.9	22326.4	18211.7	125809	168119	766222	1.76139e+06	538357	134636	47332.1	26584.7	24578.3	291331	679423	468718	415959	195999	52518.2	23882.5	22306.3	255601	169608	43504.3	20299.9	16594.7	19419.6	22531	19010	15510.1	13504.4	15325.8	18457.5	15878.3	16758.5	171783	207841	48360.3	153132	561753	162243	77386.6	268620	321634	76035.9	61130	48604.3	25397.4	202637
31417	40704.3	28263.8	36567.2	33464.8	43296.4	30843.9	99476	96089.6	121159	41740.7	28734.6	25192.6	26462.1	23309.5	18928.4	36033.4	705221	778699	277759	52989.2	26809.9	259427	93402.4	28223	111792	139967	49302.8	24026.5	20812.2	20484.2	292872	730419	146327	41187.1	50345.8	70079.2	131295	68547.9	54278.2	24435.3	22387.9	156154	69679.2	36733.2	33591.8	25790.9	19194.3	16021.6	15264.4
[truncated: 4 more columns]

## Sheet: PXG32-2
PXG32-2		WC1 Correction factor: 1.07976
238
8.62376e+06	4.12367e+06	3.96822e+06	3.50845e+06	4.44439e+06	4.52083e+06	4.55933e+06	3.90601e+06	4.52835e+06	4.15858e+06	3.11528e+06	3.09464e+06	2.81534e+06	3.63181e+06	3.91588e+06	3.8548e+06	3.96854e+06	5.3156e+06	5.46076e+06	5.41799e+06	6.36758e+06	7.42023e+06	6.02731e+06	4.30122e+06	3.87652e+06	5.01176e+06	4.87136e+06	5.05074e+06	6.14157e+06	5.14654e+06	4.87516e+06	4.21497e+06	2.69272e+06	2.63879e+06	2.44485e+06	1.94794e+06	1.79661e+06	1.72685e+06	2.48067e+06	5.53566e+06	3.98914e+06	4.4481e+06	4.93707e+06	3.85599e+06	4.0779e+06	5.97166e+06	5.60401e+06	6.93786e+06	7.56672e+06	9.75696e+06
3.70223e+06	3.88672e+06	2.9875e+06	3.05103e+06	3.37766e+06	4.42025e+06	3.7742e+06	5.46104e+06	4.33333e+06	5.56265e+06	3.47136e+06	3.76756e+06	3.00307e+06	3.52436e+06	3.31188e+06	3.76568e+06	6.3719e+06	6.03702e+06	6.69326e+06	5.82959e+06	5.2428e+06	4.21563e+06	3.53976e+06	3.73154e+06	3.48498e+06	4.37252e+06	6.00552e+06	6.31246e+06	5.14613e+06	6.29195e+06	6.23395e+06	7.24066e+06	6.7643e+06	5.44524e+06	4.21427e+06	2.89937e+06	3.18431e+06	1.99241e+06	2.75668e+06	4.16251e+06	2.92096e+06	2.71917e+06	4.63234e+06	4.6854e+06	4.74467e+06	4.48898e+06	5.18735e+06	5.39791e+06	1.01452e+07	9.22001e+06
5.22591e+06	3.19558e+06	2.95991e+06	3.17703e+06	4.54512e+06	3.73866e+06	4.8636e+06	5.89871e+06	6.79985e+06	5.94064e+06	6.44238e+06	5.27263e+06	4.80182e+06	3.00026e+06	3.94919e+06	5.10188e+06	5.44789e+06	5.79887e+06	4.53109e+06	4.82862e+06	4.18464e+06	3.70521e+06	3.76614e+06	3.28703e+06	3.72819e+06	4.33909e+06	4.42406e+06	6.11537e+06	6.01604e+06	5.17228e+06	5.16488e+06	4.92814e+06	6.4089e+06	8.46987e+06	7.94414e+06	7.05992e+06	6.75343e+06	6.67354e+06	6.94513e+06	6.53421e+06	5.44163e+06	4.43712e+06	5.52045e+06	7.49678e+06	5.20681e+06	7.49628e+06	4.29992e+06	3.90996e+06	8.98758e+06	6.92415e+06
4.22392e+06	7.36695e+06	5.86247e+06	5.36829e+06	4.82988e+06	5.98513e+06	5.74029e+06	5.37477e+06	5.31842e+06	5.83903e+06	7.90256e+06	9.08839e+06	5.32833e+06	3.31806e+06	3.38207e+06	5.62808e+06	5.95533e+06	5.83753e+06	3.9561e+06	3.77237e+06	4.67565e+06	4.34762e+06	4.29908e+06	4.75684e+06	3.18306e+06	2.87412e+06	3.96058e+06	4.93935e+06	4.36444e+06	3.96219e+06	5.58748e+06	5.80562e+06	5.21819e+06	5.83506e+06	5.67296e+06	6.2589e+06	5.29498e+06	5.62709e+06	4.74743e+06	5.29996e+06	4.4834e+06	3.31382e+06	5.03977e+06	7.42282e+06	5.19981e+06	5.53848e+06	5.38596e+06	4.86963e+06	8.23417e+06	7.03433e+06
5.0274e+06	4.00513e+06	4.49921e+06	6.83986e+06	6.87727e+06	7.74448e+06	6.10932e+06	6.87228e+06	6.36515e+06	6.13524e+06	9.01656e+06	9.96658e+06	9.18466e+06	8.79417e+06	8.55681e+06	6.87675e+06	6.49129e+06	5.76672e+06	6.29531e+06	5.54181e+06	3.70658e+06	3.79894e+06	4.08847e+06	4.55191e+06	3.98743e+06	4.10473e+06	4.65193e+06	5.39321e+06	3.70089e+06	3.25932e+06	5.60846e+06	5.84849e+06	5.111e+06	4.56105e+06	5.75227e+06	5.97713e+06	4.85725e+06	4.37355e+06	6.65784e+06	7.46869e+06	7.44922e+06	7.54051e+06	5.60634e+06	3.44369e+06	3.88735e+06	4.75645e+06	5.36378e+06	5.55428e+06	6.48976e+06	7.87711e+06
7.54764e+06	6.39947e+06	7.14066e+06	7.79905e+06	8.74795e+06	8.31312e+06	6.44359e+06	5.62063e+06	7.77026e+06	8.03155e+06	7.84318e+06	7.92593e+06	8.46884e+06	6.33104e+06	6.52686e+06	4.59847e+06	5.74457e+06	5.6335e+06	6.36674e+06	6.23787e+06	7.20211e+06	7.99881e+06	7.73953e+06	7.11136e+06	5.65334e+06	5.85559e+06	5.16733e+06	5.47485e+06	5.4684e+06	7.05981e+06	6.16236e+06	5.52445e+06	1.09745e+07	1.10294e+07	1.23186e+07	8.69142e+06	7.4941e+06	8.40688e+06	8.36421e+06	8.8709e+06	8.62992e+06	7.72169e+06	7.8332e+06	6.7827e+06	6.54621e+06	5.98847e+06	6.03855e+06	5.91458e+06	6.11392e+06	7.2051e+06
4.16477e+06	5.09281e+06	8.37911e+06	7.87534e+06	6.78912e+06	4.63089e+06	4.87496e+06	5.09821e+06	6.57252e+06	7.46637e+06	8.56644e+06	8.62406e+06	6.8362e+06	4.16918e+06	4.45079e+06	4.83977e+06	5.09856e+06	6.00629e+06	5.9166e+06	6.05391e+06	6.32459e+06	7.8144e+06	8.87134e+06	6.70978e+06	5.82538e+06	5.83923e+06	4.63459e+06	4.29232e+06	3.73668e+06	5.17986e+06	9.06167e+06	6.83974e+06	9.19466e+06	1.05571e+07	8.75789e+06	8.34881e+06	7.10638e+06	6.85409e+06	6.49662e+06	5.95675e+06	5.03115e+06	6.27943e+06	6.05345e+06	7.09008e+06	7.32062e+06	6.76089e+06	4.70759e+06	6.3023e+06	8.53376e+06	7.80992e+06
3.65462e+06	4.28118e+06	4.93696e+06	5.8657e+06	6.18774e+06	6.69964e+06	7.50699e+06	6.34701e+06	5.75622e+06	5.20114e+06	5.26063e+06	5.17283e+06	5.38486e+06	5.64984e+06	5.18613e+06	5.34002e+06	5.83316e+06	5.76265e+06	5.66796e+06	5.98261e+06	7.11391e+06	6.94134e+06	8.16483e+06	5.62751e+06	5.49631e+06	5.03033e+06	5.10527e+06	6.28145e+06	7.44088e+06	7.57203e+06	6.20035e+06	5.1511e+06	5.09145e+06	4.64884e+06	6.70655e+06	8.79805e+06	8.89472e+06	9.38248e+06	9.5571e+06	5.90765e+06	6.36377e+06	5.87802e+06	7.2574e+06	7.79349e+06	8.0016e+06	8.48539e+06	5.84648e+06	5.15162e+06	1.6416e+07	1.26783e+07
3.3338e+06	3.84068e+06	4.72715e+06	5.60191e+06	5.85785e+06	6.43331e+06	7.72541e+06	8.57715e+06	7.08631e+06	6.4235e+06	7.30874e+06	6.25527e+06	5.61425e+06	7.00734e+06	4.36392e+06	4.48107e+06	5.72172e+06	8.74677e+06	9.47813e+06	9.40467e+06	8.01632e+06	6.77657e+06	6.24742e+06	6.08215e+06	5.7089e+06	5.28623e+06	5.07177e+06	5.47266e+06	6.36971e+06	6.7154e+06	4.81152e+06	5.07222e+06	4.46355e+06	5.11964e+06	6.51617e+06	8.75512e+06	7.70615e+06	6.53045e+06	5.62945e+06	6.13251e+06	7.92071e+06	6.34108e+06	6.81452e+06	6.15965e+06	6.89244e+06	1.21224e+07	9.14626e+06	1.09922e+07	1.95816e+07	1.42894e+07
4.47579e+06	2.60056e+06	6.08864e+06	9.8374e+06	7.628e+06	8.79483e+06	1.1095e+07	8.45843e+06	6.82672e+06	8.7473e+06	9.99938e+06	9.41573e+06	7.15478e+06	6.8535e+06	5.60843e+06	6.50277e+06	7.01158e+06	7.10772e+06	5.96118e+06	4.9425e+06	6.33477e+06	6.72371e+06	6.42093e+06	5.7407e+06	6.20497e+06	6.98183e+06	6.60726e+06	6.63401e+06	7.27814e+06	5.48354e+06	5.33597e+06	4.67204e+06	5.8912e+06	8.76856e+06	9.73729e+06	8.02631e+06	8.08282e+06	4.52296e+06	6.29612e+06	7.58088e+06	6.92289e+06	7.29894e+06	7.0329e+06	7.01307e+06	8.0204e+06	1.05127e+07	9.18873e+06	8.20622e+06	1.344e+07	1.29743e+07
3.93367e+06	3.71148e+06	3.94154e+06	5.70222e+06	7.81031e+06	6.94072e+06	5.711e+06	5.78824e+06	5.44688e+06	6.72074e+06	6.23966e+06	6.82576e+06	6.93673e+06	6.83121e+06	6.43087e+06	5.9988e+06	6.77874e+06	7.73895e+06	7.4763e+06	6.57906e+06	6.65633e+06	6.25948e+06	5.50487e+06	5.91311e+06	6.16783e+06	7.45209e+06	6.91002e+06	7.67109e+06	7.40348e+06	6.43387e+06	7.06757e+06	7.09529e+06	6.95214e+06	7.56751e+06	1.02635e+07	9.05646e+06	8.59421e+06	8.76019e+06	6.75739e+06	6.45858e+06	6.78117e+06	6.06725e+06	7.76077e+06	7.4793e+06	9.31358e+06	8.5615e+06	8.13091e+06	9.7655e+06	7.86674e+06	7.15629e+06
5.27939e+06	3.69792e+06	3.512e+06	5.48878e+06	6.23468e+06	6.76977e+06	5.53164e+06	5.63219e+06	4.84322e+06	5.25164e+06	5.9374e+06	5.88285e+06	6.00478e+06	5.27345e+06	6.10186e+06	5.69811e+06	7.14293e+06	1.00455e+07	1.07719e+07	8.38505e+06	7.32571e+06	5.64828e+06	5.30468e+06	4.88452e+06	5.73765e+06	6.5562e+06	7.08194e+06	8.07984e+06	7.4095e+06	5.30441e+06	6.25388e+06	6.72268e+06	1.14502e+07	1.14938e+07	1.05291e+07	1.17207e+07	1.17152e+07	7.97134e+06	6.55127e+06	5.09854e+06	3.89955e+06	3.84187e+06	6.70161e+06	9.00943e+06	6.88473e+06	6.11079e+06	5.88243e+06	5.57348e+06	9.11939e+06	9.5971e+06
3.3124e+06	4.71137e+06	5.1744e+06	5953732	6.05587e+06	6.49716e+06	6.01425e+06	6.14218e+06	9.09504e+06	9.50947e+06	8.71917e+06	7.47324e+06	5.92256e+06	8.92199e+06	7.24921e+06	8.30423e+06	6.62652e+06	6.44159e+06	6.43962e+06	6.92846e+06	7.51343e+06	7.91011e+06	5.79415e+06	4.1643e+06	3.90967e+06	5.61354e+06	7.98297e+06	5.65082e+06	5.18566e+06	5.67862e+06	8.2038e+06	6.98346e+06	4.18415e+06	4.85073e+06	8.84272e+06	9.65031e+06	7.44903e+06	7.2958e+06	7.05137e+06	6.62554e+06	6.3236e+06	6.71775e+06	6.54573e+06	7.25861e+06	7.75936e+06	9.78861e+06	9.09203e+06	7.36274e+06	7.11778e+06	6.44511e+06
4.05592e+06	5.59657e+06	3.60373e+06	3.84162e+06	5.21511e+06	9.06176e+06	7.62244e+06	7.93135e+06	6.78213e+06	5.70107e+06	5.44285e+06	5.72642e+06	5.13649e+06	5.70902e+06	7.09656e+06	7.19757e+06	6.44185e+06	4.56606e+06	5.57966e+06	6.26974e+06	7.07868e+06	7.24336e+06	7.78764e+06	8.36077e+06	9.91155e+06	1.04971e+07	6.65133e+06	7.57815e+06	7.57567e+06	8.59909e+06	7.68047e+06	4.25897e+06	4.21767e+06	4.75911e+06	4.87004e+06	5.30899e+06	7.88113e+06	7.88119e+06	6.20703e+06	6.00338e+06	7.29209e+06	8.06221e+06	7.72292e+06	8.42991e+06	7.48811e+06	7.58411e+06	8.10008e+06	1.12991e+07	1.21926e+07	8.88761e+06
4.0018e+06	4.25298e+06	2.35962e+06	7.42664e+06	8.80402e+06	5.00121e+06	5.20087e+06	4.50896e+06	3.47986e+06	4.46266e+06	6.85165e+06	6.06057e+06	6.87066e+06	5.62171e+06	6.06658e+06	5.75799e+06	4.77005e+06	4.74745e+06	6.69983e+06	9.60966e+06	1.02189e+07	6.90525e+06	5.62519e+06	7.62518e+06	5.74948e+06	6.28453e+06	7.18477e+06	7.79448e+06	6.4363e+06	7.46334e+06	7.18515e+06	5.34915e+06	4.0575e+06	4.38726e+06	3.72319e+06	4.31247e+06	6.04054e+06	6.99893e+06	7.73186e+06	7.94181e+06	8.71235e+06	9.96784e+06	8.69733e+06	7.35913e+06	8.17078e+06	8.54902e+06	8.5961e+06	6.81157e+06	8.22937e+06	6.39626e+06
5.66089e+06	4.09599e+06	2.60194e+06	3.12999e+06	2.74832e+06	5.37643e+06	3.36669e+06	3.48042e+06	3.08305e+06	4.25543e+06	4.47378e+06	5.52534e+06	6.81749e+06	5.72034e+06	5.76913e+06	6.68936e+06	4.53457e+06	5.27922e+06	6.78595e+06	8.37102e+06	8.08715e+06	6.32358e+06	7.76771e+06	7.07624e+06	7.44439e+06	7.79729e+06	6.16491e+06	5.65036e+06	8.42574e+06	7.15507e+06	9.90661e+06	7.00971e+06	5.66562e+06	3.6197e+06	3.55346e+06	4.18585e+06	6.07671e+06	5.50644e+06	5.57199e+06	6.9279e+06	8.48491e+06	8.16599e+06	9.30552e+06	8.93339e+06	8.60615e+06	7.54842e+06	7.74705e+06	1.02183e+07	8.04375e+06	6.51338e+06
1.69024e+06	1.18607e+06	3.05497e+06	7.99419e+06	7.5117e+06	4.07143e+06	3.84317e+06	3.32555e+06	5.61164e+06	4.56746e+06	5.29808e+06	6.02106e+06	6.90686e+06	7.9277e+06	9.70743e+06	7.39086e+06	6.36908e+06	5.77179e+06	7.28809e+06	8.4077e+06	6.05883e+06	6.36502e+06	6.52869e+06	7.03681e+06	8.46913e+06	8.98377e+06	7.34804e+06	6.0951e+06	7.68249e+06	9.14141e+06	9.13504e+06	7.06198e+06	5.53412e+06	6.35445e+06	6.00291e+06	6.19984e+06	6.87871e+06	8.22989e+06	8.8568e+06	8.71536e+06	8.20064e+06	8.47463e+06	8.37543e+06	8.9107e+06	9.14392e+06	7.4543e+06	9.00287e+06	9.59361e+06	9.36148e+06	7.94782e+06
2.00079e+06	1.23674e+06	4.07482e+06	5.33416e+06	4.75244e+06	5.05216e+06	7.25029e+06	5.12514e+06	4.34209e+06	4.1377e+06	5.40691e+06	6.05982e+06	6.81879e+06	7.24328e+06	4.78411e+06	6.39576e+06	7.97246e+06	1.18528e+07	9.68731e+06	7.46885e+06	5.17806e+06	6.82028e+06	7.37222e+06	7.78565e+06	8.07824e+06	7.10781e+06	8.14072e+06	8.53504e+06	8.60904e+06	9.52764e+06	1.03403e+07	8.41421e+06	8.29632e+06	8.60957e+06	7.23822e+06	8.09539e+06	6.99002e+06	6.04825e+06	7.48352e+06	7.39343e+06	8.30542e+06	9.37454e+06	8.63981e+06	7.43969e+06	6.9386e+06	1.04598e+07	9.04072e+06	6.6853e+06	9.70089e+06	9.94568e+06
3.87232e+06	3.34753e+06	6.0847e+06	6.72607e+06	4.94888e+06	6.27588e+06	6.10264e+06	6.73212e+06	4.42842e+06	4.61811e+06	6.44051e+06	6.15152e+06	5.62626e+06	8.78934e+06	6.65811e+06	4.95313e+06	5.22792e+06	9.87064e+06	8.79041e+06	9.13382e+06	6.24318e+06	6.89934e+06	5.7698e+06	6.89887e+06	7.98965e+06	8.99434e+06	1.0274e+07	7.70463e+06	6.32631e+06	8.71335e+06	1.09705e+07	9.81975e+06	8.87143e+06	7.88639e+06	8.26814e+06	7.33543e+06	7.28854e+06	7.66534e+06	7.56964e+06	7.75347e+06	7.24075e+06	8.71134e+06	7.47747e+06	6.56646e+06	6.53571e+06	6.8228e+06	7.9931e+06	7.40245e+06	7.93273e+06	9.43497e+06
3.31161e+06	3.35498e+06	5.22293e+06	3.82445e+06	4.7431e+06	6.26983e+06	4.65566e+06	6.69087e+06	1.21765e+07	7.20571e+06	3.63183e+06	3.46759e+06	2.85938e+06	4.68496e+06	9.95975e+06	7.69557e+06	6.75979e+06	6.51362e+06	6.76787e+06	6.58258e+06	6.13844e+06	6.08503e+06	7.36519e+06	8.28174e+06	8.91681e+06	7.67991e+06	7.10732e+06	5.61118e+06	6.52515e+06	6.06894e+06	9.58283e+06	8.12003e+06	7.76954e+06	7.53639e+06	7.59333e+06	7.23528e+06	7.61948e+06	8.48013e+06	7.2574e+06	5.90877e+06	5.63834e+06	5.34022e+06	5.7033e+06	7.25895e+06	7.05548e+06	6.99805e+06	7.25483e+06	6.50504e+06	1.10661e+07	9.39727e+06
3.2697e+06	4.15807e+06	3.3618e+06	3.11353e+06	2.96139e+06	3.37257e+06	5.30408e+06	9.58813e+06	5.55459e+06	3.84799e+06	2.86436e+06	3.12115e+06	2.07224e+06	3.20117e+06	3.40384e+06	5.73313e+06	8.19395e+06	9.73031e+06	9.97285e+06	7.60466e+06	7.95844e+06	8.59117e+06	7.45401e+06	8.8825e+06	8.52275e+06	7.86119e+06	6.30639e+06	5.36588e+06	5.91423e+06	6.76039e+06	7.06303e+06	6.80681e+06	5.84585e+06	7.22397e+06	6.02002e+06	6.49549e+06	6.63719e+06	6.60483e+06	6.83232e+06	6.14925e+06	6.00454e+06	6.46453e+06	7.60268e+06	7.72299e+06	8.0817e+06	8.32365e+06	7.67302e+06	8.1241e+06	7.17405e+06	6.26146e+06
2.47198e+06	3.59729e+06	4.12754e+06	3.61026e+06	2.86932e+06	3.135e+06	8.77647e+06	8.91397e+06	3.09039e+06	3.10978e+06	2.42779e+06	1.96658e+06	2.1719e+06	3.72822e+06	4.10212e+06	5.2141e+06	7.0776e+06	8.38779e+06	1.1027e+07	1.02864e+07	8.86012e+06	8.79835e+06	7.86262e+06	8.31468e+06	7.62348e+06	7.73665e+06	6.95655e+06	6.26196e+06	6.45215e+06	6.26641e+06	5.97307e+06	5.60933e+06	7.585e+06	6.6804e+06	6.20066e+06	5.91712e+06	6.90074e+06	7.86902e+06	7.51728e+06	6.85182e+06	7.31573e+06	5.44087e+06	7.24606e+06	6.2837e+06	6.15474e+06	7.58153e+06	9.70591e+06	9.12542e+06	8.19166e+06	7.50788e+06
4.77406e+06	3.7502e+06	4.08182e+06	3.72813e+06	4.51695e+06	2.41245e+06	1.1341e+07	7.7127e+06	3.26749e+06	1.44004e+06	1.28822e+06	1.92113e+06	2.3963e+06	2.90144e+06	4.76636e+06	4.08931e+06	4.73298e+06	4.27938e+06	5.04936e+06	7.70328e+06	1.05056e+07	7.7741e+06	6.49254e+06	7.29024e+06	7.6711e+06	7.70075e+06	6.27218e+06	6.16968e+06	5.53283e+06	5.16836e+06	5.70129e+06	6.00677e+06	5.3312e+06	5.01179e+06	6.13501e+06	7.11397e+06	7.85434e+06	7.09271e+06	6.69606e+06	6.6277e+06	5.72198e+06	5.26167e+06	5.17084e+06	5.60623e+06	6.06321e+06	7.98653e+06	8.04296e+06	9.06358e+06	9.00412e+06	1.02714e+07
2.76028e+06	2.45359e+06	2.39843e+06	4.04922e+06	4.68865e+06	6.11799e+06	7.23463e+06	6.51979e+06	2.66679e+06	1.10033e+06	1.37536e+06	2.14055e+06	2.45796e+06	2.21851e+06	3.53814e+06	3.50578e+06	5.78502e+06	5.42894e+06	7.61361e+06	9.0279e+06	8.56751e+06	1.00175e+07	7.64978e+06	6.63335e+06	7.49948e+06	6.83573e+06	5.89471e+06	4.69356e+06	4.40075e+06	3.97231e+06	4.10494e+06	4.85995e+06	4.66219e+06	3.97164e+06	4.5867e+06	6.73953e+06	9.17323e+06	8.60426e+06	7.84465e+06	7.80757e+06	6.99102e+06	4.81252e+06	4.87309e+06	5.20868e+06	5.30144e+06	5.3188e+06	6.07382e+06	8.19496e+06	7.10714e+06	7.44792e+06
2.76929e+06	2.5571e+06	2.55559e+06	3.06131e+06	3.50709e+06	6.10319e+06	9.03611e+06	6.23091e+06	4.1738e+06	1.49162e+06	1.28168e+06	2.30576e+06	2.09272e+06	2.92404e+06	3.13713e+06	2.54704e+06	5.10426e+06	7.2635e+06	9.06176e+06	7.34138e+06	6.87435e+06	7.32884e+06	8.04423e+06	6.03983e+06	6.48222e+06	7.39825e+06	6.25404e+06	4.23234e+06	4.44804e+06	4.67945e+06	4.04697e+06	4.09454e+06	5.39019e+06	5.39625e+06	1.93095e+07	6.42995e+06	7.49574e+06	7.02163e+06	9.93197e+06	1.00331e+07	7.17547e+06	6.87689e+06	7.37459e+06	5.54468e+06	5.2013e+06	5.4587e+06	6.34753e+06	5.62609e+06	5.54876e+06	6.80096e+06
2.24397e+06	1.68275e+06	2.40358e+06	3.01362e+06	2.76879e+06	3.03271e+06	3.60285e+06	4.89602e+06	6.74675e+06	3.60762e+06	1.21424e+06	1.66008e+06	2.85516e+06	2.46254e+06	3.02134e+06	3.093e+06	4.98213e+06	6.22904e+06	7.82243e+06	7.30277e+06	7.20173e+06	6.35495e+06	5.79792e+06	6.54111e+06	6.34698e+06	6.7487e+06	6.10508e+06	5.55551e+06	4.49318e+06	4.83202e+06	1.33883e+07	4.8936e+06	4.6198e+06	4.2468e+06	4.39756e+06	4.41579e+06	4.48286e+06	5.45903e+06	7.2525e+06	7.83643e+06	8.26505e+06	7.18125e+06	6.22802e+06	5.84374e+06	6.57699e+06	9.1367e+06	7.84688e+06	6.06773e+06	5.94279e+06	7.28388e+06
2.23515e+06	1.36706e+06	1.24387e+06	1.60629e+06	1.67541e+06	1.85309e+06	2.75067e+06	3.30832e+06	7.23455e+06	4.90792e+06	3.19799e+06	2.2374e+06	1.50859e+06	1.74917e+06	2.24635e+06	3.647e+06	5.50851e+06	6.47798e+06	9.06164e+06	5.57046e+06	4.72746e+06	4.79415e+06	4.32611e+06	3.58905e+06	5.54354e+06	1.11174e+07	7.20065e+06	5.26596e+06	4.74141e+06	4.59376e+06	5.59332e+06	4.93802e+06	4.20974e+06	4.29465e+06	3.89898e+06	4.29024e+06	5.10294e+06	6.35884e+06	8.0992e+06	7.59883e+06	8.77454e+06	8.56719e+06	8.56624e+06	9.12445e+06	8.05185e+06	6.02646e+06	6.41918e+06	7.6193e+06	7.63968e+06	9.25002e+06
1.59939e+06	1.09418e+06	1.17581e+06	1.68176e+06	1.916e+06	2.20293e+06	2.72054e+06	2.58136e+06	5.89702e+06	8.54971e+06	6.27906e+06	4.77366e+06	3.04922e+06	3.09657e+06	4.08382e+06	5.6975e+06	7.71686e+06	6.89638e+06	6.59739e+06	4.49386e+06	4.36663e+06	5.72532e+06	5.28865e+06	4.80695e+06	4.41865e+06	4.11331e+06	3.74031e+06	4.34833e+06	4.05839e+06	5.47569e+06	4.0097e+06	4.18347e+06	3.6525e+06	3.39966e+06	3.98709e+06	6.47123e+06	4.95319e+06	5.99528e+06	6.54529e+06	6.40622e+06	8.43893e+06	9.61702e+06	8.17877e+06	7.99847e+06	8.01034e+06	7.27932e+06	7.12035e+06	8.89246e+06	9.77351e+06	8.5105e+06
1.9438e+06	2.88243e+06	3.48026e+06	2.65985e+06	2.27092e+06	2.7499e+06	2.3245e+06	2.67631e+06	4.0472e+06	4.89266e+06	5.45035e+06	5.36262e+06	6.43486e+06	4.85994e+06	5.5767e+06	7.36935e+06	8.89889e+06	7.73252e+06	6.91247e+06	4.67407e+06	4.08267e+06	5.85565e+06	4.8368e+06	4.62131e+06	4.01079e+06	3.99879e+06	4.57062e+06	5.35572e+06	6.23323e+06	5.87248e+06	4.87117e+06	4.82703e+06	3.94491e+06	3.54489e+06	4.09002e+06	4.14211e+06	4.81805e+06	6.10584e+06	6.81338e+06	7.64583e+06	8.83546e+06	8.059e+06	8.27308e+06	8.06402e+06	7.86823e+06	6.9481e+06	8.05162e+06	9.84481e+06	1.03968e+07	9.23039e+06
2.43769e+06	3.68042e+06	4.97749e+06	3.50623e+06	2.78771e+06	2.62793e+06	2.82006e+06	3.08295e+06	4.53028e+06	3.88773e+06	3.31263e+06	4.80334e+06	6.15387e+06	6.02599e+06	7.43615e+06	6.95109e+06	7.34177e+06	7.66796e+06	7.63153e+06	5.21974e+06	5.1753e+06	6.63293e+06	6.10144e+06	5.53896e+06	4.15371e+06	3.44509e+06	3.76271e+06	4.92665e+06	7.03603e+06	6.22579e+06	8.19478e+06	6.9881e+06	6.43813e+06	5.67783e+06	4.94653e+06	5.0913e+06	5.9705e+06	6.6534e+06	7.3303e+06	9.11318e+06	9.11214e+06	7.72643e+06	8.52971e+06	8.72744e+06	1.00443e+07	1.00853e+07	1.02402e+07	1.10125e+07	9.33e+06	1.00748e+07
2.14228e+06	2.67883e+06	4.27219e+06	3.16513e+06	2.79767e+06	2.66165e+06	3.37115e+06	3.62542e+06	3.16648e+06	3.10495e+06	3.30938e+06	3.61406e+06	6.58756e+06	8.10673e+06	7.72708e+06	8.21935e+06	6.41421e+06	7.10152e+06	8.36749e+06	9.45723e+06	7.32371e+06	6.81756e+06	7.65548e+06	8.51414e+06	7.40668e+06	6.15258e+06	4.76298e+06	3.88371e+06	4.45169e+06	5.29891e+06	4.94592e+06	4.91687e+06	5.80249e+06	5.09326e+06	4.78202e+06	4.50682e+06	4.55875e+06	4.02817e+06	7.77007e+06	8.1976e+06	9.09426e+06	9.08538e+06	8.96444e+06	7.22101e+06	8.95658e+06	8.95703e+06	9.26905e+06	1.02492e+07	1.12258e+07	1.0621e+07
2.76373e+06	2.66568e+06	3.04081e+06	3.25438e+06	2.3765e+06	2.21681e+06	2.56197e+06	3.32116e+06	4.74495e+06	3.62905e+06	2.99313e+06	3.14323e+06	6.15379e+06	9.40751e+06	8.44803e+06	6.88251e+06	5.86994e+06	4.41401e+06	5.49197e+06	7.26173e+06	9.01188e+06	7.91443e+06	8.17648e+06	9.64028e+06	7.6866e+06	6.83437e+06	5.70267e+06	4.79643e+06	4.14347e+06	5.40634e+06	6.50657e+06	5.85506e+06	5.41627e+06	4.95033e+06	3.95233e+06	4.02704e+06	4.34566e+06	4.97699e+06	6.28588e+06	7.12121e+06	7.05075e+06	8.06037e+06	8.38893e+06	8.64311e+06	7.82757e+06	8.60434e+06	9.49537e+06	7.54862e+06	1.08742e+07	9.7093e+06
2.14914e+06	2.82069e+06	2.66573e+06	3.51095e+06	2.8663e+06	2.92356e+06	3.89653e+06	6.0719e+06	8.10668e+06	7.01493e+06	6.02847e+06	6.57535e+06	7.1212e+06	9.07318e+06	1.28294e+07	7.91602e+06	8.21347e+06	8.47889e+06	1.09188e+07	8.94433e+06	9.24183e+06	9.40696e+06	1.01405e+07	6.58633e+06	5.3908e+06	4.57064e+06	5.58141e+06	5.53054e+06	5.48711e+06	4.70328e+06	5.35919e+06	5.89977e+06	6.17019e+06	4.83961e+06	5.56445e+06	4.93439e+06	5.28775e+06	4.66505e+06	3.79833e+06	4.96886e+06	6.68557e+06	5.688e+06	5.22863e+06	4.63222e+06	7.59124e+06	1.04433e+07	1.16193e+07	8.7932e+06	8.10016e+06	9.87254e+06
235
70033.4	34814.1	33477.4	31001.5	37748.3	39698.5	40815.4	35053.6	38449.1	34199.1	25942	24255.8	22109.6	33038.2	32862.8	34527.8	34002.6	44036.5	44145.9	46665.5	53416.1	63258.1	53877.9	35842.5	33454.3	40946.8	41341.5	42481.5	53393.8	43598	40514.4	36324.2	23292.1	21868.6	20270.3	16394.5	15518.8	14424.1	20818.8	44650.3	34199.6	35228.8	40639.8	32753.5	35272.3	48551.6	47016.2	61176.1	58348.2	85323.5
30891.7	34178.4	26489.5	26270.3	27037.2	36959.3	31548.8	43182	37288	46776.1	30409.8	31921.1	24934.6	29949.7	26861.6	31702.2	54709.4	50851.5	57822	50106.3	45767.1	34352.8	31132.4	30103.1	27627.9	36061.6	46929.2	52538.9	42108.3	51728.1	48928.7	60058.5	56046.4	46622.6	38427.3	25394.7	24802.9	19306.6	22241.4	36171.6	25635.3	23401.5	36083.4	40902.9	37310.3	36783.9	40815.5	46994.4	82404.2	73322.5
42941	27978.7	25635.2	29862.1	37550.7	31855.6	43161.3	50040.6	54007.6	49470.3	52341.3	43422.4	37288.1	25000.1	32359.7	43838.9	44342.8	50281.4	36827.9	38273.9	36368	31877.2	29927.9	30256.5	32096.6	34024.3	36565.1	49229.9	53021.5	43291.4	41891.8	41560.1	54620.8	65778.9	66502.3	56703.4	58325.3	54972	56024	51377.5	43685.8	38799.6	45505.5	62512.4	44759.2	62315.7	35163.1	32184.5	74617.9	58216.9
37246.9	60956.2	50414.1	44036.3	41297.6	47301.7	48594.2	42984.8	40618.2	47257.7	58962.5	72513.4	45330.3	27759.5	28986.4	46075.5	50107.1	48725.7	34286.9	32446.9	39391	36609	37945.2	39632.1	27759.5	25722.8	32578.3	40639.7	37682.7	33914.9	46449.5	47914.6	42436.6	47542.1	47214.1	53766.4	45636	43545.7	39412.9	43247.6	36193.1	26862.1	40825	54862.6	46274.3	45571	46161.9	40004.7	67226.8	57119.7
42195.7	34242.9	37397.6	56528.2	59290	61372.7	52451.6	55015.5	52780	50084.6	73782.5	82293.3	72576.2	73300.2	72775.9	56989.4	55411.4	48572.3	52122.7	47214.4	29927.9	34505.9	36653	38471.1	34616.3	34681.1	42835.5	45087.7	29818.6	31592.6	47502.8	48199.7	43313.6	37244.8	47432.9	50281.7	37257.3	34045.8	55345.1	60934.3	60562.2	62250.1	47258.1	30256.5	32819.3	40618.1	44386.8	43641.9	54029.6	66766.1
57713.5	52518	59750.2	63674.3	71260.3	72248	54051.3	47147.7	59794.5	68059.2	66393.3	64617.1	70098.5	54555.5	53525.3	40092.4	48506.5	48879.1	53415.5	50654.1	60605.9	67664.5	61613.8	61504	51486.8	48616.6	42217.6	47761.3	47279.1	58304	54990.5	45307.3	88417	92735.4	104653	75625.8	64485.7	71369.9	65735.9	70164.5	69923.7	59092.6	64551.3	57448.8	53065.1	50281.3	48375.2	48200.1	49865	58719.8
36193.9	42963.1	68522.6	61811.1	53613.8	38010.7	40530.5	42962.6	54708.8	60321.1	71546.6	73169.1	56244	34177.2	36543.2	39938.9	40903.6	50610.6	51333.8	51596.6	53964.3	67029.6	75251.5	53306	48133.9	48813.3	38339.6	36236.8	33169.7	43729.6	73560.2	58216.4	73323.4	92011.8	74703.6	69418.5	56988.4	57953.4	51552.6	46863.4	41319.2	54073.3	54138.8	59881.4	59838.3	58457.6	41122.4	52036.7	70998	64770.7
29796.6	35886.2	39632.4	50744.5	51311.7	54928	61989.1	50566.4	46446.8	44015.2	43926.7	43028.1	43334.9	49689.8	44781.8	45613.5	50961.3	47607.9	45964.4	47695.4	60079.5	58919.5	69650.4	47213.9	46753.6	40442.8	43619.7	53854.3	64683	64376.3	51784.9	42721.2	43926.5	39588.4	56090.9	75975.9	76019.8	78347.7	81306.4	52385.8	52341.4	46512.1	60232.9	66020.6	65077.4	71349	50062.4	43006.4	136437	112256
28854.8	34090	40596.7	49383.2	44868.9	51925.5	64683.5	70559.6	59246.8	50983.3	62315.7	53021.5	45548.2	56856.8	35360.7	36696.4	45153.9	71327.1	80736.1	80076.5	69944.8	56922.5	51618.4	50697.8	47476.2	46577.7	45197.8	48484.6	51947.4	56133.7	38687	40837.1	37770	40136.2	51991.7	72752.6	62535	56091	46008	49318.3	65669.2	53612.8	58435.6	53240	57646.3	102524	77731.8	89193.4	170989	124566
39107.6	20905.5	49012.4	79880.3	62841.5	75318.3	90452.8	70253.3	54818.2	72817.9	86833.4	75953.4	61043.8	55278.5	50807.4	52320.1	57755.9	60254.8	52079	41779.3	53744.1	53941.5	55431.9	45219.4	51596.4	57075.8	55278.9	55081	60122.7	45898.7	42368.2	40377.5	47325.2	69309.5	79660	66591.8	65034.8	43137.7	49273.7	60890.2	58325.2	61416.3	54051.3	58851.7	66196.9	85144.1	73323.2	67884.1	112296	107376
34878.7	34506.8	31987	44344.8	65253.2	57229.8	48068	46095.7	45263.2	55959.1	52780	57427.1	54445.8	55234.7	50084.4	49667.8	55914.4	61263.1	61767.6	53897.6	56046	47213.5	47936.9	48659.8	49141.9	62271.4	55519.4	63828.1	64113	54270.7	58272.4	57777.3	58391.4	62600.2	88522.5	75317.5	72553.7	72028.2	57930.8	54182.6	56966.9	51048.7	60561.7	66897.9	79155.5	74835.7	65231.1	81174.1	70187.2	58018.4
44233.5	33914.4	30914	46272.1	51355.2	55738.6	45855.4	44255.8	41231.1	44298.9	50588.3	50654.4	49669.1	40749.5	49295.2	46073.8	60386.1	82971.7	91572.1	70866.6	59312	49010.5	44628.3	40596.4	46602.6	53766.4	58742.3	67379.8	61944.9	46490.1	50807.6	56199.4	94957.8	98441.9	85407.6	95061.9	96798	70603.9	55015.9	43248	32840.9	32271.5	57780.2	75011	56637.5	51311.9	50677.1	47215	71786.7	79485
28592.1	40157.8	43401.1	52648.3	51202.1	54358.7	50719.6	49494.5	76569	79113.6	71810.5	59838.1	49601.8	75099.5	58829.6	69725.6	55607.2	51706.2	52495.2	58567.5	59509.2	60210.4	47959.4	33804.7	33870.7	45637	67905.9	45482.6	43379.6	46118.2	68345.2	57361.9	36214.6	41188.9	73718.3	78497.9	61416.8	62008.3	59728.6	52232	51399.2	55826.4	53855.6	59575.7	66941	76151.6	74530.7	58259.6	60451.6	54358.4
35820.5	46622.3	30037.9	31285.9	41057.3	67709.5	62579.7	64616.9	53175.1	46074.4	44693.4	46249.9	41823	44846.8	59794.2	58875.3	54182.8	39698	46512.1	51684.4	57251.4	58215.9	61065.8	67072.7	80298	87866.1	54686.7	61810.8	59948.1	67073.4	65864.8	39961.1	35163.3	39632.3	40771.4	42481.3	63215.4	65976	52057.5	50151.3	57098.4	63543.3	65319.4	72512.4	60736.7	63806.3	64048.3	91199.2	105049	73936.4
32359.8	35449.5	19723.6	63835.7	71550.8	41735.4	42633.7	35798.4	31658.1	36697.6	55410.2	52056.8	58084.4	50218	49821.8	48024.3	40202	39741.5	54142.3	79683.3	82600.8	57142.6	46424.9	60953.4	48747.3	51527.9	60737.2	63915.5	54336.8	64596.8	66324.9	43510.2	33651.5	35403.9	33104	35163.2	46446.5	55081.5	62074.1	66481.3	72138	82118.1	73211.8	59903.7	66612.1	68170.2	70515.1	57361.2	65100.4	52955.4
41760.1	32514.5	25066.1	26730.6	23622.7	44759.2	27716.1	28285.3	26642.6	37222.4	39851.1	45591.8	57076.1	47564.3	45836.4	56243.8	38799.8	43137.7	55541.1	70144.1	68147.8	53636.7	65230.9	58741.7	61767.4	65078.6	52495.1	45942.9	72118.5	59421.7	80149.6	58941	50282.4	32929.1	30103.3	37200.3	50369.4	46490.3	49164.6	53876.8	69901	70931.8	76129.3	72598.1	72291.4	63345.1	63039.1	83411.3	67818.4	52495.1
16832.8	9739.39	24542.8	63257.9	60583.8	34397.2	32359.2	26621.2	43673.3	36674.7	46380.7	46293.1	53744.4	63367.5	79617	57734.5	53416.4	47345.6	58107.1	69770.5	48506.9	52035.2	53832.3	53964.1	69791.9	71655.1	62381.2	47936.6	61022.4	72072.2	77392.5	55893.4	48747.7	53810.1	48923.1	52341.6	54577.3	66941.7	73520.1	68849.1	66941.1	74484	68409.9	67643.1	73608.9	60210.8	72621.5	79068.3	75275.4	65910.8
17883.7	10242.8	32514.4	45219.4	41779.3	41582	59816.9	42984.9	36280.5	36236.8	41319.4	51574.5	53658.2	55300.8	40705.9	51290.4	63981.6	97321.8	78214.5	60605.6	40990.5	55366.4	58040.6	63806.1	67905.5	57798.9	64968.4	71458.4	68520.2	79420.8	84736.5	69858	72050.7	73913.9	58610.3	64222.8	54577.7	49185.8	56791.1	59926	67160.9	85083.5	68300.5	62096.2	56571.9	91440.6	74353.9	56747.7	79683.7	80385.5
32162	29139.3	48748.4	55256.9	42283	52977.4	50413.2	52582.8	36039.2	38975.2	50500.9	50895.4	46052.1	71611.7	53240.6	41538.2	42153.6	80958.1	70559.8	77423.4	52779.9	54972	48813.4	53986.2	64925.4	73038.1	83325.2	64551.8	52495.2	67840.8	92109	76678.2	71853	62972.6	69375	59093.3	58391.5	63302.7	61635.7	61438.2	57908.9	74462.9	62864.4	54752.3	51048.6	54029.4	66656.6	58325.9	66154.7	76328.6
28876.4	26051.6	42459	31877.3	40136.2	48418.6	38712	55674.3	95947.8	63150.8	28767.1	30256.5	25197.2	36261.1	83476.8	60758.8	56791	52802	55213.1	54819.2	49777.9	50303.3	58217	63323.7	73673.7	63718.2	60035.9	46994.2	51553.1	47630.2	78118.6	64617.9	62468.8	62688.1	59728.3	60101.5	61876.9	69199.7	60035	50960.9	50698.2	46074	45745	57690.3	57536.6	54774.6	61613.6	53152.5	86755.6	78256.6
29840.9	35711.2	28307.1	27584.3	25328.7	27365.3	42372.1	84818.5	49450.3	29489.9	23291.9	24650.2	17401.7	25503.8	28789.1	44234	64969.2	80165	83937.8	64178.7	66897.6	69331.6	63367.8	72577.5	70361.5	61943.3	54270.7	44671.5	48243.4	58413	56794.4	57865.3	49426.9	58588.9	51267.7	52341.6	52626.4	52495.2	52911.9	48002.5	47082	50960.7	63719.1	67993.4	64178.7	64595.5	60650.5	63674.8	57098.2	52605.5
21584	32315.3	33783	30935.5	25722.9	24693.6	74192.7	76529.6	24453	25810.9	21868.5	17511.1	20270.2	30322.1	33651.5	43663.6	57777.9	68476.2	95677.4	85384.8	74791.2	71524.7	67072.6	73168.9	65735.2	68168.4	58106.3	52955.6	50939.3	52561.4	47501.4	48747.6	67763.1	56791.2	49602.3	49054.4	59588.8	66305.6	60013.4	54840.4	59775.9	45832.9	57603	53875.9	49492.6	64949.4	81502.6	73607	65954.3	60517.5
38033.8	31242.8	34768.7	31592.4	36261.9	20446	92391.8	67754.1	27453.2	12234.7	10614.9	16154	21430.7	23949.2	41209.8	32096.5	41100	41385	39785.6	59378.3	86176.1	63543	53350.2	60408.1	62623	65494.3	53569.2	51026.9	50018.6	43554	46925.5	48637.7	42217.9	38931.2	50895.1	58216.8	65912	57580.2	56659.5	50873.5	51925	43751.2	42568.4	46994.3	50347.9	65364	65999.2	76436.7	73345.1	85079.7
25395.2	21015	21321.4	34724.9	37682.2	48725.7	61045.9	56315.4	23949.3	9542.3	11972.1	18606	21846.7	17730.2	28986	31001	49887.5	45877	62184.8	70975.9	71875.2	77159.7	65976.8	55958.5	59137	59421.6	51817.4	38339.5	36981.2	33804.9	32578.2	39982.5	39413	33344.7	38668.4	52649.3	76722.2	69112.7	66634	62864.1	60846.7	42458.8	38295.6	43597.8	43225.2	43838.8	48265.9	64815.2	60232.4	59443.9
24540.3	20817.4	21146.1	28482.4	27431.5	46161.8	74442.5	54295.8	33301.2	13986.4	11031	19306.4	17686.6	25438.1	24934.4	23226.2	42218.3	57405.4	76501.9	63127.1	57317.1	60692.9	64860.7	50588.5	54051.2	60166.8	49427.3	37551.7	39610.2	41384.7	35732.6	34089.9	43226.8	39806.5	168069	52122.7	59838.6	57602.1	85979.1	82339.6	60210.6	58962.3	62228.1	45284.8	45197.4	45263.3	52648.3	47980.8	48550.3	59007.2
16022.5	14533.5	21321.4	28416.5	24671.4	27146.5	28175.6	39544.5	54250.5	30015.8	9892.59	14664.8	23993	20489.3	24102.3	25241.2	43028.9	51838.1	64331.9	58808.2	57689.6	53262.3	48791.1	51991.2	50171.9	55629.4	50566.3	44913	37857.5	39676.9	117594	42371.4	38536.8	36105	38581.4	34155.3	39369.3	44391.1	60540.3	65846.4	67643.3	60364	49142	45460.2	54357.8	75055.5	65056.2	49164	49295.5	60780.9
15650.1	12431.8	9016.89	13329.4	14818.3	15650.1	23313.9	27365.4	60280.3	43709.8	27935.1	19722.7	14139.4	15737.8	18649.8	31746.2	45855.1	56286.6	77687.5	45461.1	40968.5	40903.4	36105.2	30672.8	42678.1	91291.8	57976.2	46643.7	40705.7	35338.3	45397.6	41341.1	35491.6	37858.2	34966	37069.7	42721.3	50325.7	67577.5	63631.1	70844.4	71764.8	69551.5	75953.8	65603.8	51355.5	51619.7	64332.5	63433.2	70691.5
13395.3	9585.98	10439.8	15343.5	16898.1	18365.1	23970.8	22218.9	49604.8	68366.8	48396.7	42020.6	24364.9	27080.9	33892.6	46841.4	64134.4	58171.9	51268	36609.1	36170.6	48331.2	44189.4	40333.5	38668.1	34681.2	31986.7	35294.5	34922.5	46075.1	32503.2	35798.6	30650.9	27299.6	34944.3	51751.4	41954.9	49799.6	55469.5	51443.2	69901.7	79552.1	68805.1	66963.3	70977.3	62446.7	56637.7	70427.3	81722.1	69111.7
18518.9	26007.2	29358.6	23379.8	20423.2	23839.4	19131.4	20817.5	30957.5	41955.9	47761.2	42655.7	51640.4	38054.8	46008.1	59136.2	75801.5	63828.5	56134.2	41013.3	32227.7	48856.8	42568.7	39741.7	33585.7	34725.1	36280.4	45964.6	53810.3	49470.8	41741.8	37463.3	33016.8	31132.3	35403.8	36236.4	41428.8	52100.3	57624.2	62886.5	74551.1	66502.8	69858.2	63257.9	66371.3	56659.6	66174.4	82314.7	90870	76568.4
20073.1	32468.6	41998.2	33170.1	23248.4	22897.8	23949	25263.2	36433.6	30234.5	31745.9	42152.5	49777.2	49229.6	56484.4	59443.7	57471.1	63872.2	67643.5	45219.3	42108.5	51070.4	50632.7	43006.6	31110.7	29051.7	31943.4	42349.2	56506.7	54467.9	65889.8	54182.8	55608.2	47652	42765.2	40508.6	46205.7	55256.8	62842.3	77644	74791.4	63126.8	68037.5	71041.7	77598.5	81173.9	88216.3	91111.7	73694.1	81262.3
19197.1	21649.7	36083.5	28723.3	22612.9	21978.1	26401.5	30979.2	27212	28460.5	27912.8	29664.9	56397.4	67226.3	64968.2	69352.5	50763.6	60123.3	66152	85276.2	64244.1	56024.4	66700.1	71152.1	63060.6	53438.5	42042.4	33323	36258.3	46446.4	44696.9	41100.3	48374.7	42853.3	38427.3	40421.2	38560	34418.6	65077.6	68674.2	76307.4	75033.8	74045.4	58961.2	71701.3	77028.2	82140.9	94556.9	99340.5	89488.2
20927.1	21605.8	25700.9	26554.9	20269.9	19219.1	23598.6	28854.8	40968.4	30475.8	24518.4	25635.2	50984.5	78675.1	72817.8	56748.1	48463	38208.3	45263.6	61791.7	75581.5	67379.5	66284.4	80208.5	64684.3	57516.1	50830.1	37967.1	35557.3	45089.1	49906.6	49186.1	45066.1	41254	34681.6	35951.7	37594.8	40026.6	53438	60649	60694.6	63455.9	71721.2	73278.9	65078.3	71064.3	82270.6	63656.3	98487.8	74575.8
18365.3	23095.1	22700.6	28745.3	24583.9	22131.3	30477.2	49645.9	64552.2	56090.6	51619.7	54555.4	53459.6	76897.8	103951	67094.9	66327.5	65976.2	90017.1	75714.8	75143.4	84179.1	84024.8	56003.3	48002.5	38865.3	49426.9	43839.2	44978.6	39259.8	44997.4	50435.2	52408.7	40289.5	48002.9	40596.7	43137.9	38646.3	32008.8	41714.9	50982.8	46095.7	44890.9	39611	63038.6	85298.9	97325.4	70669.5	68256.7	80406.3
232
96620.1	84069.3	79764.3	158321	115424	50904.6	62531.7	65370.6	55447.2	80977.5	90401.8	97519.4	86981.6	84088.1	113398	87524.9	25422.6	37701.1	65275	90636.7	126189	101090	112067	76637.9	37978.6	73854.9	64371.3	40037.6	30568.3	35806.9	38993.3	27756.6	19597.3	19376.7	14618.8	16694.5	16143.3	15628.7	36305.3	16772.9	25644	99065.4	90121.8	39347	26306.5	25772.1	24522	33548.3	45989.8	42408.6
26195.2	45019.3	69288.3	101825	130507	96205.7	64872	36544.3	23290.5	49638.3	86527.3	68272.4	63673.1	73341.4	82637.8	67538.5	40992.3	51964.6	340515	86773.9	89817.1	66234.7	53829.5	69673.1	140523	102858	61694.5	40698.2	28528.2	23308.8	21789	12285.7	24484.9	16657.7	18274.6	21362	17612.9	17374.1	14930.7	17558.2	35808.2	44816.2	63060.3	64022.6	50500.2	34503.1	98616.4	111641	117992	66773.5
52159.7	60967.2	65423.9	58833	51760.7	30917.6	25863.2	27408.5	51381.6	37683.8	40938.2	75929.9	103154	86738.3	83020	53352.7	29465.6	54969	127074	107556	101439	95098.3	72652.9	74401.3	105619	93961.5	96818	67516.5	234658	98790.5	58204.7	46087.6	34575.1	35513.4	66972.2	49306.1	52489.2	77588	69380.9	71696.8	85652.4	109145	51764	59010.6	94866.2	292771	149196	146564	245599	67928.8
31545.3	78548.4	66048.6	38069	30644.7	186307	58194.5	59587	45570.4	53390.2	69695.4	98583.2	107266	70204	72473.3	82697.2	45312.7	284012	122821	118584	72579.8	43914.8	51216.2	99178.5	94940.9	83219.4	153888	79687.6	50333.7	48733.6	80248.5	62861.4	87383.4	85157.8	62438.1	77512.2	76206.1	326694	435896	98230.4	71129	35587.2	85796.1	70586.8	100209	73720.9	110872	149810	81931.1	84775.2
50228.7	49083.1	52305.3	52027.6	58044	75218.3	38677.3	46363	145717	86300.2	117488	136531	70884.5	141187	137906	112236	98562.9	187185	130803	94164.5	108085	59170.7	59018.2	100028	132538	84527.3	67742.2	101276	95747.4	64370.3	56879.6	65585.9	69102	89168.3	96712.6	98343.6	367384	124802	109174	125012	108793	101363	84031.1	77461.2	74147.6	77144.8	65801.2	50319.7	25294	44928.2
50548.5	250142	119724	38604.1	40720.7	113138	47025.6	39723.6	48660.1	51989.4	42923.2	68364.6	110065	119683	81948.4	126698	102602	97309.4	86647.8	74809.4	129505	131893	94376.8	126543	87401.6	105467	100132	97401.9	107798	270531	126027	116231	206861	433220	171629	179428	111376	124851	119205	273410	214885	123919	91501.6	64704.2	45221.7	39612.6	30090.3	24062.5	21471.4	63645.2
66149.3	21490.7	17025.5	52175.1	42925.5	33527.6	65924.9	81990.2	84064.4	83211.9	97105.9	231148	344394	244519	233280	136245	120409	62702	35292.6	51015.5	47504.7	96775.4	52596.7	58372	67557.8	107462	119074	140382	110289	137284	318288	137237	100460	87956.5	155667	171950	70112.9	92323.2	60458.6	26561.8	28197.3	32701.4	86821	65149.8	77937.1	116531	317317	135919	97782.3	84968.7
43496.8	45647.1	45095.1	86360.5	48629	36323.6	137966	72399.3	119144	298500	421299	164277	114467	110650	186539	176480	211034	179635	90833.6	66694	55687	59220.4	110341	80515.8	80421.5	129245	96310.4	83734.4	111836	124228	239736	145077	122650	85490.6	60213.1	72257.5	148948	57013	29024.2	26267.4	24062.3	23070.2	30311.1	32039.2	35404	96468.4	104200	116500	77211.6	80808.1
71075.4	152058	92050.4	49011.1	92604.2	54273.4	53556.4	55483.7	79849.1	104682	101325	83955.1	103711	156885	321166	247538	214397	98797.5	52835.2	61849.8	84016.2	77954.3	81769.8	60285.6	77974.5	99520.7	134341	84843	112941	96607.9	110564	129425	112569	153519	157737	69693.5	59045.3	86220.7	171622	30017.4	27278.3	21618.3	27867.8	32480.5	28730.3	99339.2	115103	81703.4	50909	63837.8
49932.4	38106.8	138398	79373.8	83375.3	186431	412538	111320	62090.2	66948.6	74621.7	91345.2	121161	103708	225111	267367	96866.8	60100.9	61095.4	62678.7	70333.1	183802	239982	135866	73000.9	64927.1	61831.1	75690.2	57304.7	106939	110207	102007	91634.6	132917	71093.4	109159	135510	104181	70910.8	28858.9	22410.3	27737.8	33564.2	39208.5	33509.2	34446.5	38380.6	44211.2	44724.7	43786.5
48054	61715.5	57178.1	55429	79544.4	73968.5	57048	70000.6	30827.4	36032.1	64518.7	67314	71332.7	60838.9	65143.6	56993.4	46967.6	126282	76555.7	122229	154310	217537	162526	69506	101437	100774	60198.9	82956.6	95214.4	65272.2	115118	71351.6	116933	149682	170145	96023.6	65953.4	101008	83937.1	61758.6	66396.3	49195.3	114679	64335.9	37241.9	31119.6	28601.7	30641.8	36708.2	28436.1
48826.3	51713.7	54540.5	69212.1	85104.1	50517.6	54253.5	242908	207734	234185	517138	230090	91349.4	56940.1	73435.8	33049.7	36286	44358.7	39098.3	101567	112017	248816	121338	102153	147233	119521	83802	88890.6	124105	128347	155760	86570.5	125275	261080	105594	70208.5	97639	72321.5	140994	94330.6	63063.2	62458.7	57397	64354.8	58832.2	45018.4	38803.4	31634.2	30329.7	24411.8
171382	86040.8	54714.2	83844.5	63303	57049.4	119942	92598.1	133510	261549	143570	93500.7	147530	119153	73005.1	169150	132070	141117	91548.5	96949.1	124631	112185	159232	107800	84123.2	143241	81104.8	75376.2	66230.8	58923.9	61783.6	226697	71420.8	62585.6	50094.2	51936.7	87958.4	97404.2	115138	162874	116219	157788	115665	85687.6	149517	262934	114456	59096.9	35604.8	36395.9
154146	112885	67125	53157	155180	381520	97207.4	127253	115400	111630	122196	122819	175779	157476	75196.2	47226.5	128373	147060	98649.2	68381.4	67406	73940.9	102584	93372.3	261252	192387	163477	112973	55800.6	87668.5	162160	82506.7	54380.4	53313.1	54674.1	56480.4	107088	210853	131750	122714	98635	234216	97117.8	38951.4	34208.2	63563.2	60764.9	78493.4	55085.6	48446.5
257149	163525	29337.5	350916	195546	101162	140226	90589.8	66874.4	80916.7	121802	165239	245732	144828	653403	131314	146311	139471	125788	117731	172278	86921	88688.7	247342	104588	267098	94287.7	55097.5	51842.3	59772.7	89659.9	58612.2	44319.7	44117.5	53478.3	72284	79870.9	65998.3	126916	146542	92574.8	84318.1	762968	472687	167321	120358	104062	425378	232711	121298
221231	50630.7	61602.6	62311.1	47201.2	91046.1	62239	46970.6	37572	58102.9	111355	102727	142887	194810	317613	298994	159560	130415	284464	254262	197905	167162	182223	112941	77755.2	176275	158804	111720	88620.5	99137.1	237838	91809.5	52688.4	54085.7	60231	59972.6	98978.6	109680	96592.6	70851	275557	131511	177496	75103.1	67462.9	57507.8	54914.4	110178	134160	152003
18257.7	10559.1	21161.3	61448	71556.5	53157.5	38638.8	40072.2	210019	164246	90851.5	80039.3	62333.4	48183.2	133344	175012	297120	196811	296587	211649	566689	484861	74339	43661.9	98157.7	177874	146924	140681	178180	100152	104400	77897.5	67296.4	85615.5	108923	83113.3	100318	152262	44798.4	67187.6	67849.5	103658	62918.3	64814.1	98429.1	109000	99501.6	129033	205081	181873
21251.3	13057.1	30664.8	89284.5	65108.1	63397.3	89429.3	43440.5	36782.3	71303.6	70243.6	83056.9	90454	66692.7	51364.4	74040.1	82925.4	91943.6	186945	119442	154504	414887	591764	112454	161002	277140	148867	138689	144869	135532	137023	76923.1	77830.4	130437	58338.4	122847	107010	83353.8	90039.2	47042.4	58339.1	382055	93262.2	85802.8	105103	209734	62815.7	60681	88008.9	260185
37516.8	31469.8	46863	123729	87567.2	94236.7	76648.1	40164.8	27480.9	27039.2	44007.4	57011.7	51310.4	137475	120337	140000	74291.1	55576.9	82502.3	109142	137085	115944	71697.4	74006.9	65180	109584	133254	87180.2	90164	70646.2	113020	92160.3	113170	177322	179914	127084	152251	116593	83147.4	78672.9	71365	88892.7	66212.2	83260.2	101537	104167	599702	1.14506e+06	209311	156732
42684.2	46986.8	92717.9	68384.4	129131	128825	107781	70206.5	81496.6	42080.7	12452.5	155132	43611.3	18404.5	61172.5	64683	65253.1	88357	97758.3	92134.6	93744.4	77130.6	46362.7	39706.1	92026.9	103169	84933.8	80333.3	65458.1	69217.1	67183.3	84125.9	98625.9	95501.9	255289	134418	68990.2	134593	99892	95340.2	77311.3	107480	94272.3	83151.8	118483	123154	123899	103076	193203	195170
29722.8	62059.5	52986.6	123368	69691	86739.1	110693	215783	31710.1	24450	21896.1	24229.2	15904.5	18991.3	27959.5	66392.7	107856	151952	163471	125061	68091.7	100321	99031.6	74329.7	107868	94841.1	114281	79961.8	83739.8	77551.1	60686.2	53500.9	244006	122868	69769.4	57562.9	66570.8	206668	141117	100147	75136.5	76959.3	98286.8	90715.7	91543.2	195748	210031	156097	140739	72689.3
14783.9	20976.2	70469.8	91635.6	131257	91656	249494	65553.7	11092.3	18771.5	20148.5	20406	28675.7	24852.4	49261.4	48552.2	64941.2	76342.1	116830	111009	122256	122606	115661	180320	124587	112231	78009.5	53755.4	81326.5	101382	78207.9	94343.5	937633	236118	128415	106920	250586	197230	409842	251757	140476	81414.7	87855.8	102249	125378	141087	197861	99700.2	60454.1	52491.4
26617.7	32225.7	42741.7	98803.2	135334	91752.6	291232	145612	14324.9	11110.4	16052	17393	22022.6	32921.9	58335.6	42886.1	36855	43088.6	35310.9	113499	158607	359115	206805	119340	155395	128115	97600.2	66946.9	70335	57839.3	83888.4	120823	140892	135911	97550	120057	156511	122338	131543	127883	83276.1	92445.2	74936.9	70996.6	125984	97018.4	114247	87364.7	74182.3	53701.1
40037.7	42647.7	38638.2	44835.4	77972.1	94284	303477	56087.7	31249	11202.4	5857.2	31178.3	33161.7	21986.6	32720.2	43493.1	33529	50739.5	54624.6	79098.4	95923.4	145038	133896	134906	99081.3	103984	74421.6	63506	93028.5	85396.2	105634	129608	136659	131932	167407	131175	121128	94611.3	128436	140332	85209.8	87081.4	83206.4	101398	70700.8	71456.1	85621.5	82201.3	97423.8	74534.1
59258.8	60435.6	44265	107999	90749	80967.9	43400.6	37718.7	49609.2	15409.4	7693.79	17246.2	41567.1	21692.2	22463.6	26580.9	39908.8	70334.2	104930	97180.7	152071	121088	87363	125460	127349	161223	92581	84475.2	116347	83073.4	92181.1	95606.6	1.84005e+07	5.47565e+07	2.186e+07	801745	246670	199911	120823	97571.3	167289	123974	72897.6	60783.5	261093	71047.6	96046.4	88893.7	63414.9	86987.9
56479.8	56537.6	70532.2	64560.2	44577.9	46251	89314.1	121685	75825.7	21233	13038.8	9622.33	30809.4	19101.8	17227.6	23713.3	35020.5	314035	156691	134168	195869	150900	115313	108567	136831	139440	162870	277968	268776	542316	1.267e+06	952233	541094	228622	148653	130722	98912	91469	94216.4	107152	102394	144710	90237.5	70390.8	123839	84545	81896.1	85872.6	159005	132155
65833	36818.2	45279	42977.6	36432.1	48421.3	49727.7	54972.9	75138	29763	31066.7	16805.9	13755.1	19358.5	13130.7	23364.5	47081.1	63729.4	144474	117785	137110	123534	109566	60784.4	69553.1	119166	112005	123592	115646	133905	148244	140063	139097	99486.4	78156.1	118118	110374	119408	124753	119173	165336	109272	141857	295409	129921	111408	92649.1	120836	163884	213255
37481.6	24007.3	40933.1	34832.8	39208.1	56957.1	75935.5	71330.2	81475.7	69582.5	68774.5	23897.5	12359.1	14986.4	65406.7	39061.9	92141.3	86636.6	123797	82555.6	74584	101475	116756	87454	81802.2	74310.5	136049	132047	108724	391579	228848	96001.9	108277	91789.1	120449	437628	239707	156629	412234	105454	103437	129608	239057	217024	141703	99431.3	121905	197867	153912	131412
65446.2	57237.6	201863	118097	72753.9	63433.4	85061	84368.1	174027	93460.5	102697	68825.3	42446.1	27866.5	60784.7	104265	201389	138692	89096.6	58686.1	50223.8	140213	284892	151838	67002.1	104617	195928	139969	146760	130804	116169	277417	127996	111825	128454	259561	199476	181141	95490.2	56643	93507	56275.3	136978	102929	133171	103242	69175	77439.2	90905.9	97456.4
38897	142264	134027	75808.7	57341.8	61297.1	56753.3	105412	160095	104683	90396	160097	56792.6	38934.2	81419.3	113174	196721	94417.2	89703.4	81433.8	148885	112686	118872	113659	143388	148605	165323	174146	147250	155544	448560	409872	156235	128210	226475	167883	164165	202050	201046	96263.4	66857	98381.5	216768	85527.1	49176.8	61889.2	66777.7	69744.3	354222	160839
70151.7	47559.7	94675.4	62773	40348.5	50352.7	62701.1	54804.1	75551.1	123735	86571.1	122175	82761.2	39319.5	63544.6	115239	180417	191146	211195	164745	132018	89978.2	119740	184340	202589	175581	132769	100593	94050.9	255315	146124	152412	153910	202870	160567	338676	352006	222302	195614	202703	137466	103232	134524	105715	105572	135578	130045	97461.3	94920	68695.4
207549	63240	43293.5	59507.6	53171	54932.6	52634.1	39649.8	50738	125322	121604	106273	782827	207213	175132	100152	92650.2	96613.1	111202	181293	160689	136567	144017	163417	131635	125084	86072.9	101827	221761	114202	117733	102530	108003	98001	106057	96702.5	113714	140891	143742	154993	162264	701468	227290	153001	193802	204651	144728	232729	152898	138110
45443.8	61283	61150.3	318310	115500	60010.2	44871.8	56386.1	73411.3	187548	127797	122620	78192.6	113802	151031	97028.3	87017.1	94900.3	524365	229996	65496.1	104526	289757	163574	104835	119615	88383	91693.9	104626	120925	86311.3	86822.3	93773.9	95264.1	375754	284630	184072	117001	82107.5	221799	165665	142933	107665	126772	265903	154616	132657	98635.6	306346	100998
208
330195	326851	236530	316793	268745	173820	173720	203734	237984	269344	279742	286211	250785	240347	233092	240564	137910	235808	235601	185313	186595	311404	216620	228761	165081	206410	233720	151751	133478	141191	222749	182278	185646	115452	110653	118990	130107	124316	109230	217707	116751	153091	217971	187642	207453	251106	240052	269158	161466	184964
127978	170236	255159	333049	384669	309860	201466	195010	190986	272469	322952	250070	208214	229030	227479	318803	294477	231620	298738	171054	221564	242144	215481	244276	392497	264832	204045	172775	123352	126216	138799	130689	144072	102463	109832	134287	116861	117383	96081.2	90469	142447	185466	255074	234805	207599	195872	215366	280312	199526	177608
172324	215378	223236	220961	195002	173557	149075	144020	232292	214481	237478	332326	330479	281625	243031	230016	194760	262749	283420	239013	297139	296652	254735	313704	320745	296341	283808	250723	244766	255197	268447	255390	241632	179113	214429	193553	189615	185532	216478	237717	344872	303891	432153	190762	236200	396042	308940	446616	468820	146608
85990.1	179987	191773	185203	140054	316500	203223	203163	225735	196033	144981	271927	298359	248475	209057	186012	173632	346688	326702	302614	235322	209960	224096	348951	357390	344024	294255	291641	233944	206532	247340	295646	304658	269031	248262	263629	264996	271410	365853	354675	253030	145707	222836	216019	180508	240630	383904	401137	268116	203739
168584	231562	212158	239544	191878	177532	163231	208788	258573	248414	304270	345718	250171	366279	301221	304307	315704	383845	358207	294598	267499	258356	249771	338328	362059	288652	235389	222774	286429	253187	216696	312111	330931	315582	298861	285642	347258	328066	321616	315080	238811	250273	263914	287522	221511	230486	211511	212650	135962	149808
174926	819166	482696	148268	139490	204343	178271	200790	238061	229204	221378	269406	371095	330434	266501	311508	301080	351467	270820	266900	283102	213195	292338	440778	358610	310571	304350	327782	342652	367448	346464	411804	503718	697652	324254	467330	404726	455041	360157	475351	475610	285267	305102	247303	171916	195628	249884	276900	223169	458628
235934	106253	81866.2	138999	163449	170126	198975	246676	190344	224837	311151	488353	712041	504838	478656	438872	318530	225090	236252	275167	238488	253005	221406	335079	305258	329976	411700	349120	318707	332225	316167	347401	343883	282104	396562	429849	311624	300735	281600	314698	290159	272521	278981	238099	259962	351865	368885	252889	317035	313975
176504	147667	168843	190741	169350	160864	192737	238047	310131	416980	437814	324393	312624	369290	425080	460309	371889	274194	223429	210925	228517	254411	352986	255410	274359	339664	267991	270322	303200	385071	421886	414171	396016	327141	299255	256574	334970	237554	229965	272418	342580	310882	287601	298438	240830	325595	379691	310659	205747	269521
174958	228741	236818	214967	227847	229932	222688	174031	239276	299214	399343	291052	317911	427461	629314	559638	521929	273173	194441	290187	458747	311970	309017	267371	319544	359987	378536	301100	280174	320242	378768	489396	349491	374545	293705	250123	202457	251870	261536	297992	352238	316357	332620	313913	256634	298303	308457	206664	162006	182324
188467	142879	217226	213270	446848	545614	940258	272504	228866	238888	242348	272563	332712	346013	497784	535858	288523	236525	278575	257101	273706	353515	457196	339811	281696	267244	286597	297835	264930	339184	373230	367028	319115	298773	232146	312028	359795	321075	263246	283380	290984	373456	256342	203991	191882	191165	215230	208272	185042	176957
157782	240064	231999	180378	177110	201519	203680	203240	201446	221298	258603	262608	229942	253328	231084	220234	209536	265877	263548	299471	344642	464677	481001	306686	338269	319239	247306	271930	350961	356335	382338	295746	309840	238540	285003	247540	298506	375116	390655	277352	296435	259986	236048	237971	246965	245042	209318	171309	189520	176357
178988	229014	236910	203422	225388	227146	206350	227895	282052	436495	1.08294e+06	514277	351042	256734	246281	228006	249168	248888	230736	305543	297617	291627	322479	327086	397261	564943	283918	357361	385594	449519	398287	303914	259942	270204	170815	195167	279694	265173	416545	323799	258645	242313	238926	263777	233923	221926	221785	218189	184217	154497
243757	279411	731457	1.05699e+06	287460	221683	286868	251039	361394	559227	442634	336670	345037	327941	271551	260960	304226	264685	321508	305078	293371	361724	503470	348402	337404	361255	287109	331314	302110	370670	281268	381828	295630	279112	235078	226139	294767	316089	385329	494812	362666	362840	273220	331031	701453	438690	304056	224029	169333	190670
1.09483e+06	502165	725486	704072	997345	536002	271019	311346	333942	352645	392017	362204	409275	372363	277595	246671	372964	438477	321323	268461	287849	292346	251260	289316	498930	355863	457210	412923	348227	314853	341172	311331	300751	305470	319936	275082	336509	361901	343095	312398	301034	298281	299594	294968	264396	278893	253271	598845	212728	197957
729852	1.45135e+06	459880	623124	634545	438161	325887	323929	275972	302647	319450	395580	421670	356305	280545	245797	384233	350791	361972	519771	449935	304436	311905	387610	441307	388438	295056	233008	287589	321213	351239	285539	258827	257379	290290	285331	282721	283607	361643	264423	293708	258556	281500	294884	300495	296972	283205	550102	455773	327518
1.05378e+06	742061	430287	371481	192723	338635	263820	245851	212738	244014	239024	300286	314958	481036	333169	422712	335243	355854	691310	780820	453233	336521	399777	354916	286759	305538	334538	334074	344987	298341	335523	262884	280489	272997	279070	268652	256465	250064	335206	271404	294637	300232	280340	233152	235514	252256	263006	296138	347960	373227
125690	172290	497686	693819	728388	683427	318707	255719	280072	399323	309674	281412	258578	235042	320421	435035	473753	348500	416612	445291	624323	477236	315414	241790	226490	436235	494627	475011	412005	315881	329686	315142	284590	271502	243459	240482	236029	243052	216810	254700	230836	261583	202183	212557	250954	273755	286889	286397	432226	420482
216496	265338	280640	357142	480308	353731	425730	241488	220201	254863	301125	294889	307224	282591	236069	231413	257306	241408	452456	436400	437229	468686	347482	261350	344432	503557	382195	356187	425671	343815	305689	269819	264853	333464	248786	328052	317547	329536	281020	259847	289515	332901	335020	218950	233666	355750	223047	269984	285154	337079
235207	191351	222472	309194	302359	364136	303144	337536	240555	248841	236855	257818	207538	333769	293112	268623	287897	263207	316555	292199	535247	342214	264164	273218	229949	283591	331980	335868	360732	295153	352963	324590	315992	356580	364053	382168	372471	299261	345672	280044	294368	350461	312207	301184	314154	291595	362391	443803	315263	369065
220018	249398	292375	324999	309533	335982	367355	267884	458662	293120	376460	136040	159046	129987	294020	366062	354809	322182	288562	266818	254922	305809	268133	194761	258939	317901	285501	358894	321199	230843	316614	231836	282737	282089	289604	287364	276968	360637	323208	348597	306386	312956	270236	255851	455819	432839	335005	335142	541100	654417
157459	219927	290849	428441	334400	356704	444040	467236	296670	164492	105128	188775	132039	166505	252776	303809	472819	487442	319849	308203	275358	278904	288014	284773	328068	293230	391977	336887	259779	307988	307900	251005	248472	298413	251591	305140	298495	416453	360072	328676	304310	283922	272311	263592	275978	322178	352978	338895	343866	336222
267105	242959	278733	350643	387153	405386	846484	316113	118272	115160	145092	146540	220018	249939	231029	268499	338045	343459	446744	322725	324686	334758	294010	361449	298610	333500	324714	312218	299625	345128	313162	316124	367530	419627	355638	307456	349719	426863	710048	477401	307657	293457	748264	325948	306115	382747	430707	295127	312313	340290
190084	179642	224370	354715	360347	253813	638279	332587	180302	97160.6	112897	140875	189725	239632	262860	224746	228561	205258	209539	276382	313974	363744	262409	628480	1.45535e+06	391481	396825	374162	334302	283056	336745	348073	362021	366215	365819	373947	445877	410736	360611	386445	322510	359995	281274	311501	336833	266878	303323	306051	293419	256101
234923	241351	266519	200687	296307	317079	402713	269639	181797	143680	127164	221261	195285	175202	158023	205608	217248	219444	251435	265778	329815	335938	297314	317633	309364	287186	310454	326623	337244	298137	340918	423457	1.29864e+07	2.66893e+07	1.45083e+06	454864	334021	282389	298321	315367	360420	269642	281786	304205	290246	323067	308933	248446	300512	247752
281425	247159	253253	292425	307473	259540	404284	320302	289909	326608	142328	141567	199858	200494	211529	189177	264254	319451	330543	310268	281100	308380	277309	778795	365916	392381	358279	398839	413631	483995	629577	556533	591366	878655	562430	345239	373620	272675	334180	301647	236315	263927	270803	251627	253854	244938	332735	313880	257922	226067
216193	264491	236339	240789	224312	228592	312669	422848	467558	275906	102272	149444	176991	170033	137368	259029	520548	407662	403450	487913	323870	374195	283706	274144	313130	342885	389557	425990	397128	350609	369910	374236	345136	349575	405969	331949	275463	238957	296857	353881	371436	365018	289563	332285	296963	306590	317370	313733	306249	279623
257851	196524	192011	213256	230148	264243	298221	326990	360038	280931	250980	117129	126637	179302	181434	310403	382361	388074	383236	330148	377997	381782	324297	200269	217537	267151	364544	374660	319174	353265	380622	523282	518836	360192	309326	388375	329860	357269	415385	371089	403755	368091	597360	345382	403652	335876	353115	358333	362315	382979
213594	170579	238006	223968	287052	291466	323459	285102	326443	302676	237251	227130	163635	219880	183121	199193	319060	290666	295355	277217	269721	273835	260935	311959	268725	304058	382960	357990	328056	411206	400489	327016	286623	304477	318915	311074	302582	323207	360114	295664	279059	305573	361440	319462	264733	278307	340909	487525	371600	327245
415837	410958	727423	715555	373500	311439	409738	381623	491800	365070	311528	275552	221423	183120	291470	303635	367238	379440	276791	228252	230472	375214	656943	453588	290697	331769	615830	437265	384317	394696	342797	300177	392541	362380	342645	334900	331634	319184	284928	268566	311259	270527	461059	331061	296746	271037	291662	263897	350670	268496
253350	729918	519694	322694	321555	320142	280272	340792	461608	389889	336819	319443	260200	241196	303462	333862	312404	299936	259597	251440	313627	318501	370667	360647	346884	471451	537854	578800	377987	412004	367577	319297	351562	330223	386717	405297	357273	392592	449207	311959	318178	340427	316545	357177	266263	257228	225467	295746	301613	284116
293710	222227	220296	226598	238832	269996	257674	240319	300833	392969	338278	846272	339240	239908	285971	334069	394872	373519	466142	456145	369337	278105	357618	349143	451859	397108	431093	380635	327036	443421	379979	471303	371684	380203	427773	394420	440309	403158	399915	361090	359152	277139	361207	282758	308863	391287	356797	266217	277387	242023
265628	215852	246769	252159	270732	303844	293416	216122	251332	297070	283809	345533	548834	358360	332122	280638	336842	339900	341481	482822	434402	395205	477660	1.04881e+07	2.0826e+06	446077	339165	379887	448056	329684	351037	309527	307989	294809	318211	347326	333235	355159	325685	384069	431145	353426	355604	375759	420982	529867	369688	284403	320346	348378
238688	262543	332312	351315	304763	312470	282107	326149	301494	604055	475192	322605	286526	3.92864e+06	1.05747e+06	393071	353465	359969	821454	404028	278017	446748	427921	351970	352218	365598	343684	440491	399510	369515	320846	343355	338589	335929	391261	341897	349513	329730	308571	397902	462711	365870	313477	304407	1.18286e+06	449921	297836	286762	322900	309349
207
149452	171953	114570	151925	125105	83928.8	81663.6	99319.7	114360	134049	133240	139877	121312	111971	119065	123509	68312.2	106648	117285	87229.5	88690.5	158755	108004	110757	81262	97562.7	109677	70469.6	68204	68035.9	101745	86573.5	87294.7	53567.3	57099.1	61891.9	61922	58875.4	52467.5	52826.5	54879.6	74022.2	107326	91953	100104	116965	114108	129596	82343	89224.6
55577.6	80691.7	118150	160809	182187	149465	97354.1	93561	88902.6	120238	148275	118702	97180.5	110611	113683	152924	147194	108724	148745	84456.8	109995	117304	105990	113681	189506	128204	98048.9	78640.2	64545.7	60165.6	63812.8	63593.5	73684.5	53207.7	51833	59425.7	53757	58940.1	45024.1	44855.1	75255	88691.1	120906	106905	96735.9	94345.3	103436	132801	94005.4	88861.2
84084.6	100972	101204	109574	93391.2	84859.4	74594.8	68863	113743	97796.3	110397	156754	153958	134850	113067	104551	88522.6	124909	138965	109253	135321	140938	123538	109889	151579	132646	140560	122409	116518	120122	123389	129704	113913	87505.1	102520	99958.3	88373.1	85368	102158	115715	162408	143820	200640	89201.1	111731	193444	150032	209133	223181	77752
44010.7	81218.6	95783.5	88754.3	70870.4	138758	98898.7	100040	107200	96820.6	73726.9	127253	142147	113236	95020.8	87526.6	85855.4	159933	160023	139980	112028	94639.4	104976	159226	167451	166711	139981	135974	112790	98493.5	120847	141379	147936	127114	120440	125016	129490	131565	170338	172117	123581	70195.8	113540	97424	86024	120991	180582	192710	130554	92352.8
79101.5	111052	105632	107624	95952.4	89179	78699.8	98663.6	120904	118934	141345	167650	116264	161594	142403	143732	148702	189211	167572	136271	131332	118194	126186	153682	169019	135700	113362	114509	134808	121774	99201.5	150373	154570	150861	145241	131587	169065	154975	159068	153705	119657	125059	125953	141155	103174	139928	101649	105508	68268.7	72479.6
87588.1	391034	244075	71251.3	69029.9	93923.2	84565	99616.1	117346	105355	109614	129636	177388	155207	135149	142885	149310	164392	138815	130232	135594	105314	135832	217953	172711	142146	139983	158133	158412	179103	159084	193326	230663	324229	160281	225875	200303	220990	169324	228436	229229	141958	149356	120444	86362.8	90173	115672	135338	112112	214630
121679	49346.8	47567.8	71971.6	76033	81197.7	96015.2	118405	102476	107876	146090	224958	333361	246877	219783	206387	148103	113811	111839	128407	111837	121031	118157	168366	141571	159197	204561	167048	153638	151305	150233	162868	166770	132710	189429	209668	147724	139786	136514	158055	143163	128788	128724	114232	124851	159960	174818	124511	150544	152343
89877.3	70679.5	77898.1	94196.8	81859.1	79612.1	94850.5	109066	149735	203546	207240	151221	152979	172501	198996	210581	172333	134024	109782	106265	109128	134937	158045	131337	133685	166163	130356	132965	147297	174127	210501	199738	189037	157561	143775	118045	162082	116690	107537	134256	165262	150137	142376	138497	120608	153371	178488	150247	104086	128430
87083.1	114231	114552	103200	102899	111286	109551	102290	112981	142653	188762	134684	151262	196891	293867	254724	242085	139145	96586.8	132978	221317	143716	142379	122346	148298	168405	187897	139580	138119	150141	170260	238809	166433	182837	136233	116310	98133.5	118827	121307	149632	177594	154063	160318	146175	124064	142176	148395	100697	83694.5	87399.7
95133.7	68121	99511	104296	200549	251524	448805	134693	110226	112284	120990	130783	159088	164768	234611	254047	145573	106689	131903	127707	134322	164891	220519	159579	140467	126966	135529	136023	125566	158582	185055	174557	152385	138991	108281	147432	168129	157646	127926	136954	144032	175279	127074	95805.1	93750.5	92352.4	106816	98472.5	88309.8	89155.8
75420.3	107347	106414	88416.4	86087.2	96354.8	101648	96184.8	95782.5	101313	116795	125758	106860	117094	110120	106945	105548	126736	125675	140320	159407	217653	236307	144566	154195	151093	122524	125280	172031	173625	185736	138985	145388	118111	134771	124232	144603	173840	177569	132265	141889	130273	123363	116478	126202	113194	105081	86912.8	93940.9	87845.2
82361	104870	115060	100972	103428	103428	102241	105314	135253	214438	491537	253905	166447	126548	119678	102475	117219	118256	117919	147806	147617	143924	156417	158601	189525	259510	138218	168448	183664	209128	193475	143226	125994	139793	87001	88270.4	139071	124401	200594	149444	122707	118764	113870	126922	112917	104995	105545	101585	90871.1	72965
106777	127521	325419	511168	136552	104066	136257	121563	165694	276588	219442	162422	164862	163271	130422	126882	142017	125867	149524	149906	141890	173125	242454	170167	161126	165497	139577	153723	145600	180959	134069	186470	151390	136971	111837	106563	145031	148993	178627	238060	171077	179569	136313	153502	622253	207786	149587	115147	83462	89409.1
503069	232216	315392	272745	455619	268412	132732	143589	160304	173708	192307	177509	198556	183344	137333	112578	175157	215918	151141	129848	136165	145499	127880	136376	225780	186603	212047	197729	166496	191222	161556	145728	142889	153575	150117	136927	161599	169786	163671	149883	146730	145772	139514	152048	130763	135890	126944	289408	109123	92501.5
347617	744851	166363	308226	313882	210282	150797	154933	129255	135857	146511	190528	198976	167788	133480	121817	187396	159050	162234	247556	219765	148781	148419	185831	208978	192393	143226	119625	133220	158940	174625	137268	121583	126074	139069	132985	134405	139234	174393	128895	142466	125249	142340	138774	140217	146450	128456	242419	214125	158286
622888	295269	154261	166138	89451.6	166877	123452	118110	101860	110271	116477	137303	154509	183307	158198	205938	152792	176154	317089	367254	217145	162205	191796	162974	142844	150949	161021	151779	172732	149439	156244	126356	131866	128110	135507	128936	124366	117729	155185	132433	144627	145197	136591	111350	112175	121564	123851	139161	157563	170420
69058.3	79285.6	217517	344278	336261	273598	151847	122855	131058	188021	149378	138968	122282	109826	150004	204412	209046	163905	199864	210789	283298	224728	148487	117543	111522	206821	235420	230196	192139	152266	161731	157690	135784	132986	121880	116286	119104	117601	111711	128406	114486	127328	102390	105632	120337	128641	132330	138179	199697	194375
87463.3	131352	149853	188255	216714	162483	202712	126040	103577	127581	136506	146659	150647	138525	111265	111434	123406	112754	214877	211999	199239	216824	170573	127011	166238	247571	181081	172710	208026	163400	144587	132222	127793	166706	117749	154342	155505	157478	146775	122092	136398	154104	155869	110101	116163	170297	108364	126754	138738	170909
112094	91549.9	111097	152601	142697	175647	142124	161393	112156	111861	114678	134113	103662	152267	140956	130294	141761	137013	156571	137966	248552	168408	124935	122663	115355	135149	162317	160114	171014	135489	168100	156110	156780	169849	172140	177950	174900	142931	167046	140341	143989	161302	150265	144644	156142	140341	172107	201977	148082	166328
106335	115652	137778	155060	150861	160624	171377	128897	219350	134245	89257.7	62281.3	78656.5	64124.4	138180	155760	163587	151877	143567	123618	126355	142610	128810	93645.1	131650	147805	141956	166260	154932	110671	145608	111456	123196	133179	138159	140638	130507	172205	157753	162844	147827	147169	129298	125314	211229	209937	165223	162471	254508	323581
73305.7	103725	135830	201083	166050	177573	199133	240179	156240	91258.2	50523.1	86009.6	63211.5	77197.1	118176	140384	213202	221274	149481	149041	136529	130316	134724	135745	154551	147533	191228	160300	124508	138309	154676	122983	114252	137418	130167	137058	138096	194880	179521	157415	145833	143590	132456	126119	136822	160319	176977	166602	165856	159343
135435	115928	134684	159556	183409	186681	404244	163125	57529	54117.6	67444.6	70467.9	105004	113830	111461	127116	162406	163441	211041	157821	152874	162676	138797	173303	138061	152346	160023	140171	143416	161784	148197	157756	178807	198725	175102	141871	162686	202333	342592	236759	155407	135932	282818	149078	143543	173369	211214	141719	143885	162082
98666.5	90284.3	104265	168871	177216	113683	306518	177033	84967.2	42085.8	52340.6	63345.8	94724.2	117098	123598	106945	102815	101417	101036	129065	152429	164167	125103	373489	747457	186617	192415	178020	159619	136545	161170	170271	173560	176490	179699	176270	211263	188083	170548	184897	153191	170424	141087	146050	163801	135363	150289	140554	136212	133868
95977.7	110149	120144	102179	145892	157828	192585	127321	82025.2	65031.9	61117.7	105003	96248.5	83504.2	81770.9	107832	106267	106609	117963	129766	150111	161827	149204	148359	154469	137886	146829	154443	163610	142484	161507	227063	5.69103e+06	1.41089e+07	506496	230302	163170	140152	152734	152005	174267	126904	133154	144329	133197	155038	154551	118600	139009	118446
135247	119574	117775	135785	142887	123448	188522	126863	137085	149787	65009.8	66976.9	100027	88860.3	99002.2	95818.4	125081	153936	155674	149652	132243	148493	125866	329521	166032	186297	168827	192861	185577	226374	291005	267610	190463	187230	219882	162131	182899	126861	152541	154774	112625	132840	129108	120148	115570	112347	161002	147303	121224	105654
107927	126631	118109	112345	106224	113384	146072	199167	201045	146518	49931.2	68120.8	82382.2	84055.4	71404.2	162169	154513	199324	191156	238764	153259	185867	134264	128194	148847	164924	184109	202952	188357	164335	195176	162614	165649	173561	194073	160224	136611	117289	139221	161266	177237	168535	143271	149995	146116	151739	152852	145239	155405	134399
121270	107735	88545.1	101183	109698	123791	140650	152452	164038	122781	119643	57882.1	58240.7	85134.3	85134.1	151817	182124	179862	184070	156693	182095	185599	153958	95933.3	100551	127370	173930	176704	156428	165947	186398	239632	251664	173413	142547	185200	160214	182711	191566	171292	182097	185599	288512	173520	188643	166987	168872	168233	174814	194541
109459	84139.5	120229	105144	132284	133961	144165	134751	147592	160373	128510	103746	74573.9	107751	90975.9	98429.8	138058	135890	157951	134343	126520	136592	117452	149892	130335	151148	179758	168806	165982	196954	194488	153235	134901	147390	149906	148636	142547	153446	169431	140956	133389	152356	170512	150734	124189	128237	165269	233391	187634	152556
184673	198104	328578	335727	179351	153722	197962	180101	249866	167852	146365	131185	106777	91570.2	138392	142802	179018	187603	138288	106372	104912	184927	315897	214146	148237	149836	293258	211551	184410	194960	166768	143713	182264	167810	164082	152558	157204	144950	137503	134556	150329	129913	229444	175820	143754	135680	137225	128792	159473	134768
120553	332134	244348	150901	151159	150371	133666	147366	209941	190968	168894	157215	126308	111055	145468	154213	152514	140469	127751	123321	142547	164211	169479	175493	168658	216982	269903	256633	174772	188541	169410	148826	170468	169918	179084	194650	173561	190342	214671	147532	159897	158622	144816	160747	124510	118746	111310	136152	128493	138455
133395	116563	110188	113491	106795	129917	125144	110143	151125	185915	161952	408545	172871	114700	130358	160114	196702	168278	220333	216350	180008	131651	164019	178810	234542	191805	205038	181163	153325	199486	171338	225992	178166	184217	194993	180841	213433	190312	199146	166776	167682	140877	160562	137401	140364	182269	168212	123258	134704	118531
131232	101268	120042	124107	129595	154001	138566	103979	116179	137417	138455	162188	254064	178261	169936	135933	162394	165693	163022	234400	211980	185599	215605	5.34129e+06	589500	218080	157668	198762	201124	158840	166461	151540	152025	136082	147700	156119	161510	173101	158585	174357	208653	162378	166432	174085	198532	264343	170064	135956	147871	166155
117427	123933	152770	170403	152888	144921	134726	162677	143737	263467	224970	183550	146325	2.07634e+06	540691	206760	164670	184478	378371	205024	128710	209097	204971	176319	159055	166409	158312	183753	197323	178443	157481	162767	156550	160980	187215	164270	186896	160813	145433	186983	216196	177112	152751	146383	571295	224242	144099	129701	158219	146940
206
213663	227458	165142	197008	183092	122434	127968	142432	156070	166349	173614	178808	155037	157348	155913	154947	98339.5	166073	172184	137170	146082	216359	172483	150503	118847	147803	154198	109887	119130	108534	145941	125997	117468	84888.7	77388.4	78952.4	86002	79790.7	77114.8	94085.9	86558.7	111263	154114	134374	138159	170786	167321	183430	135441	164957
87608.2	118368	155851	195753	222998	202822	138576	161762	131024	175330	188474	165684	136617	147928	152289	192638	204786	162515	210171	133878	150962	168799	147628	150884	228819	183738	148662	127064	103511	112027	114010	115451	127850	99004.2	90248.4	93269.9	88712.5	80806.6	69676	81559.1	113739	125194	170625	159903	149099	141605	143759	188300	170613	159890
145109	149500	139035	144289	145277	126516	118227	125783	174111	160334	168443	209686	215133	168286	156701	161821	130202	173408	187039	166008	181508	189936	164239	147589	204525	175634	184672	170932	176597	176266	177375	173789	174453	158509	171295	159257	147380	135903	167548	171643	224943	211342	265028	154955	158414	261426	205948	269422	311975	149490
84380.3	137537	147822	132124	110611	206593	144254	149733	154064	153587	133837	209967	197954	155971	131957	136078	136628	239618	205345	186484	164410	140736	150165	219190	211226	199406	183549	191937	161342	138494	171130	198130	207660	179432	182592	183317	187290	184821	224734	231382	161514	104798	131726	167950	131391	165981	239438	247531	204433	153612
122832	145521	145213	170182	144932	148882	134603	174203	178306	179912	223313	255910	193627	249916	231760	210959	221146	260708	239525	199906	168781	170412	163573	214117	221800	183969	159025	152489	176769	161785	153075	207083	217825	202573	202064	189959	230419	203467	220068	226159	186919	186908	182036	184455	148876	160384	147814	160258	113314	128577
139713	499930	331379	139446	136198	170980	142209	142596	180173	180392	174248	198644	266366	229683	186965	191953	204815	219783	193105	187519	194536	177367	204201	293180	227017	206719	191696	221576	219356	254406	222888	254451	326233	457810	259204	307151	270214	302721	251151	320671	325970	204523	215138	191310	138954	142817	166847	188435	159397	296964
167743	98029.3	101673	127376	134667	123767	141939	175093	154264	168759	209697	308099	450084	315254	275787	264486	199141	164039	161288	184963	171194	185355	181965	230265	196177	219165	261644	215607	198342	213522	238425	236234	239881	222313	263687	282489	210334	209453	192529	213532	195264	184760	180595	173425	194263	235160	232810	181181	244007	211972
128552	112421	129818	149870	134746	132132	150805	167171	204143	264297	275830	212908	203232	235821	275566	291800	243091	197171	161005	158964	162241	194297	230909	186565	187441	223331	175147	175934	221707	270711	284714	267046	252038	197556	203302	187867	235022	192870	186302	178104	222930	206997	205814	207917	184786	230112	233262	202164	219283	233088
130037	151110	154844	148668	163081	166921	179015	157357	179592	202378	275277	199836	207585	278031	370124	323423	324580	211116	163517	206470	302747	211370	205115	178223	199251	225425	253978	195663	196629	215117	229889	289419	219008	248205	200296	195532	155335	177104	180614	189672	239492	210573	228044	201506	182104	232517	227603	180345	229537	192377
148908	95567.5	155311	178783	292572	363740	611599	212789	171127	189765	197866	213309	227642	230489	293326	326623	202758	166414	189412	178641	188282	233500	286410	226045	198191	189606	204047	209729	192503	218507	230893	230491	212543	220836	182615	210641	244231	204869	182712	201677	193947	230746	181092	151660	151695	166288	176720	165762	172318	184376
115590	153025	152820	135696	144713	158561	152516	150156	148992	159501	170246	185824	167264	175638	163334	157381	161883	189044	197291	209874	231526	287147	305636	209109	217566	225478	180802	197426	237212	223678	256566	212592	214627	181674	221768	195104	220990	259152	257473	186274	200785	182149	183129	178087	196392	190344	174334	156946	153263	146163
131276	149628	158085	148508	170167	170965	153097	154896	188786	256307	606558	338927	254115	179458	178149	155284	168888	186255	193961	225482	211954	194197	203737	219667	261115	346187	199921	239651	261357	275721	251332	207294	209892	222749	154683	168340	229306	198846	270044	218159	182245	160348	172685	200419	173265	165585	166588	155963	161094	155459
132497	179486	392592	625660	200030	165395	203584	181075	261207	372374	314981	231231	218222	234181	188737	204872	210457	187003	212225	211016	213520	231967	316519	219434	202441	221286	225019	227143	201092	239629	208603	239143	193046	184105	185371	179230	213503	221919	247138	313158	235927	246785	202555	205898	567633	310041	230838	171671	134227	142426
620964	306981	360204	353449	576156	383569	205688	220477	217048	227178	255241	241817	257154	241474	199787	177237	236261	276330	215344	190549	195660	205697	196644	208284	324326	270337	285672	271054	238303	225388	229266	198502	192660	204997	206876	180811	229426	273638	226228	213297	221066	217918	193426	218478	188260	202887	180121	384563	202672	157255
407934	759886	216015	371726	423498	281252	231445	218767	175708	182528	219235	266111	272799	234634	192592	170645	249393	216933	238736	342231	324787	217276	204087	263264	281983	253896	206871	173243	194193	220219	260572	201905	163564	171644	182293	182956	198465	189298	246616	191792	212850	202876	217916	203043	201290	229331	203880	325221	293892	216360
504735	981548	223003	238965	118750	229381	163108	161981	143678	159157	165066	191205	225568	242935	225017	277402	209686	234549	398707	473393	299964	209610	265174	227606	203612	227362	218845	211728	250087	201572	245366	191078	191604	168837	175237	162812	186686	161567	204168	195175	213846	218410	207031	184766	183258	188721	182096	208247	237160	240909
81786.9	99636.4	260643	460859	459368	423260	213707	163319	191057	239590	216886	194695	185957	178849	238198	280939	302185	222279	274834	295937	364283	298728	208238	170617	166931	298094	311417	295568	275034	240235	247629	230790	192269	200294	178518	169056	172485	175267	172899	194888	175342	193580	161326	176463	201786	196614	215027	216250	295662	274414
148293	164806	177447	256626	428059	234013	292674	166065	170209	171098	190009	210993	211664	344077	150505	167760	189917	208092	310257	286961	268334	283854	244860	187118	226859	315866	272466	243280	278168	252365	230731	199966	192443	240724	175893	215254	222047	223855	202383	186923	198537	248611	237138	164126	167022	259553	185335	185019	210807	249930
155591	132782	171481	220085	204507	240710	204375	230255	161763	158644	169203	194504	154694	221286	213975	171322	186343	200574	232448	210954	355101	260124	178088	176384	175990	206139	248329	235719	235905	212492	268267	251785	213648	237397	254453	251055	252304	219302	244426	204321	196305	242920	220147	199052	211235	199494	229338	289393	220461	262657
145841	164443	200335	208407	202545	227278	237171	191093	313934	206547	127734	97006	114084	100206	225421	237377	241578	216418	206548	178948	170783	198476	178830	151102	209257	208353	212524	235785	223841	162653	219479	170741	192802	198827	208309	201671	195889	243211	220342	234394	204066	210565	187019	176915	285345	279305	235219	229986	368687	417034
119833	150807	179359	250536	209262	222659	261093	334149	192440	127022	79050.3	126610	91727.4	110269	152587	202445	290660	324629	234912	208419	217421	215875	194248	217482	235914	213861	254268	222862	174515	193556	206191	182805	161103	206339	182457	197214	206151	267431	246823	217287	209290	200268	187384	184993	194477	240570	240114	242401	238215	215017
177234	164566	175075	216697	238228	228427	483538	233594	84303.7	93426	101848	102258	134200	155198	151091	204338	227324	233732	312123	239559	234183	228612	201246	246600	204950	223078	215246	195744	195257	225448	217712	205929	270968	267763	230679	193914	230539	269807	448504	310546	219663	196645	384122	220629	206464	240307	297679	221286	213519	220394
139879	118539	145082	226756	236634	140442	419708	231630	117288	64854.2	73095.1	91246.5	126838	154607	171892	143701	142081	130453	142743	187924	237933	235959	187978	491436	836998	254371	249379	260732	215257	189479	227805	231462	234647	225371	235149	244452	281713	250638	239896	253215	209951	229365	191211	195894	233374	191192	211509	224763	197196	214024
158202	150830	154035	132586	196167	211140	252991	194118	108270	83221.7	87428.2	141810	133149	113202	118929	136556	158137	157246	181265	202687	216078	244884	214082	217735	234686	194872	206577	203569	215858	180221	206811	255660	5.84541e+06	1.4815e+07	596195	296768	239328	210660	210105	219347	233436	179032	182902	202928	190432	206639	205639	190974	203081	178010
158069	164376	152813	180437	182069	232974	284740	217848	178273	152549	85454.7	99188.9	123744	131393	146288	135000	175399	218168	232897	218709	193610	228626	192317	415082	248172	261234	234114	239808	237417	324981	352477	313753	263339	310426	699836	224439	255491	186346	239659	222431	170295	185763	193310	173858	179161	164240	226079	200231	172638	156713
145426	151330	150172	154090	136972	146966	185921	261935	276265	153884	67688.2	93138.5	133497	112324	103733	153932	257353	257280	275364	315197	223279	244186	192298	184306	202654	230907	249777	257643	253818	212455	298025	222514	222955	226482	244992	204677	189172	170778	206600	230580	260357	244912	202444	199851	195784	236039	226876	198385	215657	204570
158617	123155	116354	128614	135931	152039	187016	194877	227280	269330	152105	84949.9	80574	109472	112969	189235	247999	253263	268744	211232	247639	239023	209965	137771	143983	210918	245157	236206	200248	221245	267378	278001	319609	228906	194050	241449	211892	220883	280511	250471	275537	264813	370130	247368	275522	213698	229330	244990	245755	282522
126020	107223	144817	132153	166013	170814	191029	173090	231527	224254	171998	145720	117468	137243	130932	148145	207361	196099	223407	170578	167111	194731	172623	203775	170846	208452	226181	225668	204053	243231	252875	209513	182230	183006	199409	208743	194346	214514	245563	199433	212536	224479	241142	222915	192930	194925	225955	289431	286561	227042
228656	271252	484827	481477	223505	187071	230156	229393	311881	225955	208344	184886	162668	125261	199575	210349	274954	263986	206876	154768	144304	266948	397558	271984	213671	191691	365010	266276	247779	283060	221465	193986	237261	212582	210628	197134	203309	211781	191417	198800	215345	188626	299022	239742	214575	189711	195515	206647	233754	207463
185211	482756	361072	204024	188170	193598	177965	194486	285221	249013	214700	223825	177680	166035	221402	208597	231464	209214	199105	184065	191239	232051	235180	229761	232403	263471	324699	333201	244059	246802	267463	218282	253286	238491	245617	260239	235228	270685	270165	219469	237454	222218	205223	225837	196692	203021	189422	235030	226813	213072
183550	139960	155156	147509	146024	168198	166425	158712	186066	242422	205698	466664	242200	175748	186966	229797	250815	237317	316990	297060	264724	200371	249430	246497	311963	241971	266565	240587	193865	277848	221476	285563	226587	247246	250450	238830	260361	234602	272621	246498	256895	213434	244632	195801	210320	268537	256413	211221	226688	196207
176471	133857	155775	164192	162112	191744	173047	143580	163937	185008	177531	205695	335122	244728	236927	197243	223937	230572	233468	283651	310232	231793	297340	5.23698e+06	799707	297490	216530	249951	253594	223080	231843	192647	218591	190451	193566	206928	214016	233308	212953	241029	276786	239220	249711	250988	281355	350794	249728	200312	241121	247102
155774	154138	193857	232558	203827	190956	182869	217650	207829	360098	303045	223301	195886	2.19214e+06	1.26617e+06	281279	239778	266922	520852	297150	201098	291878	289325	246149	211556	242470	221788	232938	272207	230611	221543	222485	216265	222452	247452	215219	236550	221166	187506	256437	324747	239900	209799	188487	728164	318057	234175	214315	243130	232999
[truncated: 12 more columns]

## Sheet: ETC2
ETC2		WC1 Correction factor: 0.87807
238
60.841	162.823	80.898	326.972	1869.13	4689.14	5430.01	6212.09	10988.1	3227.57	3021.86	5203.52	6850.32	13149.7	14014.5	22868.4	12474.9	14879.1	13705.6	13149.7	11647	17576.5	14590.9	16567.3	31209.1	86517.3	79063.3	63660.4	270369	564476	814377	918027	1.08598e+06	1.07244e+06	1.37078e+06	1.35679e+06	1.36364e+06	1.49814e+06	1.2757e+06	1.73999e+06	1.85955e+06	1.1422e+06	940083	926989	831942	778366	1.23185e+06	907694	2.03779e+06	1.13787e+06
799.359	511.363	963.631	2486.7	6747.31	8291.29	5368.27	8167.86	13190.9	13149.6	13540.9	13890.8	11399.9	11647	14138.1	24825	15037	19388.4	23506.6	23176.9	18358.8	11338	9691.18	12635.1	26533.8	35783	65683.4	83925.9	164097	351918	487293	917495	1.07404e+06	1.17094e+06	1.18391e+06	1.78369e+06	2.74186e+06	1.79676e+06	1.73168e+06	1.6248e+06	1.44729e+06	1.33938e+06	1.67074e+06	952185	656312	1.04952e+06	1.28942e+06	1.44148e+06	1.88604e+06	1.60851e+06
2136.9	1045.98	2322.01	2466.16	5450.62	7756.07	13890.9	18317.5	25380.5	20047.2	14982.1	10617.7	7097.3	10000	19944.5	17658.7	16610.9	18544.1	24433.2	21344.5	12182.3	4318.43	2527.78	10000.6	17370.4	45344.2	107954	130303	148191	496194	948050	1.40414e+06	1.71074e+06	1.58684e+06	1.35189e+06	1.25517e+06	1.43259e+06	1.54535e+06	1.51997e+06	1.43153e+06	1.34476e+06	1.59328e+06	2.0829e+06	1.26603e+06	445184	784311	1.27759e+06	2.12497e+06	2.33728e+06	1.48596e+06
4071.51	2774.76	5183.04	6047.4	6088.73	7097.24	10617.5	13643.9	9073.55	8518.04	13047.5	5224.3	2877.77	5162.56	3145.35	2177.86	9662.14	20337.8	11235.3	23321.3	29025.8	15311.6	15909.2	7817.94	6418.17	25710.9	77274.1	174585	638482	183587	717203	1.00523e+06	1.52373e+06	2.06047e+06	2.22133e+06	1.40944e+06	1.04642e+06	1.57108e+06	1.45199e+06	861141	849279	1.53999e+06	1.91653e+06	1.18094e+06	683059	899437	1.29318e+06	1.70097e+06	1.97748e+06	1.91208e+06
553.285	490.761	984.233	1354.7	593.102	737.738	675.932	675.87	593.102	675.573	1684.09	1539.93	1025.31	675.994	799.123	901.887	2209.92	1972.14	1416.44	1354.64	4668.97	7570.96	22600.5	24680.6	27831.3	24639.2	31991.6	118182	196736	161358	262016	655816	1.36839e+06	1.69856e+06	2.10056e+06	2.18215e+06	2.04844e+06	2.24389e+06	2.27167e+06	1.84554e+06	1.49648e+06	1.54843e+06	1.63442e+06	1.25144e+06	985163	1.1713e+06	1.32681e+06	1.48266e+06	1.57071e+06	1.57088e+06
203.483	183.846	121.681	142.283	162.823	224.085	305.948	244.328	264.93	223.602	531.903	490.699	737.553	675.994	655.998	1107.72	1002.58	5883.01	1210.48	1807.51	3310.04	5182.98	3948.15	5121.23	7406.08	27523.4	31085.8	34030.5	82035.7	105767	285087	340876	452031	781943	1.11725e+06	1.53586e+06	1.75751e+06	1.86227e+06	1.96688e+06	1.66442e+06	1.09847e+06	1.29259e+06	1.17523e+06	990970	1.10104e+06	1.27942e+06	1.36263e+06	1.41424e+06	1.25543e+06	1.26005e+06
182.522	429.499	81.381	203.966	511.363	80.477	40.238	285.891	203.545	183.005	407.932	470.58	510.818	757.734	449.557	1169.34	3216.25	6047.52	6150.53	6253.48	7632.52	7838.48	3556.96	5759.46	6417.93	11668	18502.9	39575.3	65085	95061.2	143038	328196	741921	413044	655382	889668	1.24875e+06	1.27639e+06	1.12337e+06	1.13576e+06	788027	746065	927741	826710	903207	1.09859e+06	1.02762e+06	1.07335e+06	1.31526e+06	1.43766e+06
223.182	163.306	204.027	326.13	326.191	408.959	428.472	265.71	676.415	285.83	860.806	573.108	326.13	449.619	1601.62	4956.48	9473.95	23568.8	46146.5	50456.6	129541	860955	4.98917e+06	363603	26475.8	23263.1	31300	50492.5	76686.8	102840	103706	105254	267333	389997	662063	742583	827817	834890	679229	589198	546710	843669	1.46456e+06	1.51321e+06	1.17207e+06	1.33854e+06	1.41129e+06	993339	853717	1.02999e+06
429.016	634.307	367.755	407.932	429.982	551.961	367.693	964.114	1067.06	922.488	1416.38	1334.04	2280.93	8703.83	3680.45	11297.1	20820.7	36770.2	151451	360836	241788	964555	814631	794178	474603	168054	98085.9	72605.6	75284.5	58176.9	73431.6	120983	97087.6	419842	1.64822e+06	1.90674e+06	1.64944e+06	1.06656e+06	685595	857196	1.28011e+06	1.57088e+06	1.81318e+06	2.1573e+06	1.94432e+06	1.57117e+06	1.64253e+06	1.47365e+06	1.07127e+06	1.10614e+06
245.046	285.347	163.306	182.039	367.272	471.063	367.693	1026.34	244.687	470.035	675.449	798.938	1148.8	2404.54	7756.32	14673.4	10425.5	13005.8	34445.8	85938.3	97772.8	90386.6	235669	1.03263e+06	917062	723229	141951	79658.5	78584.7	81018.1	63452.8	74398.4	90751.5	218211	588908	1.93395e+06	2.59664e+06	2.59823e+06	2.04295e+06	1.97038e+06	2.36084e+06	2.5291e+06	2.53988e+06	2.52602e+06	2.42312e+06	2.06175e+06	1.78605e+06	1.65393e+06	1.50233e+06	1.33316e+06
449.557	182.459	203.545	573.045	656.234	593.226	347.574	737.255	512.328	367.211	613.643	778.881	2198.52	4936	9032.41	5450.49	3636.95	2136.77	2527.84	5944.69	12882.3	23362.5	33639.8	71512.9	194417	254146	358069	251545	100715	95042.5	86274.6	108263	144070	247386	406937	725203	1.85091e+06	2.57484e+06	2.62819e+06	2.48335e+06	2.64754e+06	2.99696e+06	3.05446e+06	2.98817e+06	2.9089e+06	2.75812e+06	2.35393e+06	1.92667e+06	1.6255e+06	1.43785e+06
449.136	285.891	202.938	634.369	697.079	1272.35	1848.53	1251.75	613.705	469.8	716.654	1067.06	1457.59	20336.5	23178.6	8644.87	966.064	1951.54	5718.32	7529.76	8394.3	16197	38069	78646.7	85450.4	97062.2	104858	135880	107273	105683	120870	160164	240827	454393	647124	788397	992945	1.11812e+06	1.21887e+06	1.40461e+06	1.69324e+06	2.21945e+06	2.42219e+06	2.23319e+06	2.05503e+06	1.8034e+06	1.67653e+06	1.511e+06	1.44987e+06	1.59279e+06
759.727	264.386	306.555	840.687	922.91	1478.19	2507.24	1148.68	449.495	614.188	778.522	1272.29	27137	36877.8	10206	2219.12	1807.47	7550.36	26060.3	22786	16567.8	18029.3	53238.8	143350	149976	105457	86563.5	81779.2	99948.2	113750	145622	234298	336427	473392	776572	974773	1.17456e+06	1.16215e+06	1.11747e+06	1.1791e+06	1.25804e+06	1.39048e+06	1.67162e+06	2.18587e+06	2.36962e+06	2.21086e+06	1.73919e+06	1.59704e+06	1.4654e+06	1.47628e+06
388.778	263.903	613.766	367.755	840.142	1354.58	2013.29	1354.64	840.625	407.993	1169.53	737.614	1066.94	2425.02	1354.58	3063	3655.43	9155.96	29254.2	33103.8	27420.3	16176.4	39473.3	159177	192846	181769	162081	137093	132963	151238	196201	287257	444730	664026	941832	1.11437e+06	1.26941e+06	1.40683e+06	1.79104e+06	2.18117e+06	2.74462e+06	2.14418e+06	2.37903e+06	2.23266e+06	2.12133e+06	2.05211e+06	2.07962e+06	2.35629e+06	2.84021e+06	3.09967e+06
9238.43	4874.31	778.274	162.341	161.919	613.705	922.551	1025.38	696.473	758.278	490.699	819.602	1045.98	675.573	778.398	1457.59	1295.31	8312.51	34587.7	53046.3	25155.8	4977.26	45397.4	56117.7	86068.4	100341	82068.9	94815.2	127247	145374	303054	553264	682074	708574	932737	1.20433e+06	1.55423e+06	1.68148e+06	2.05926e+06	2.64333e+06	2.73998e+06	2.21345e+06	2.20953e+06	2.32246e+06	2.44895e+06	2.44666e+06	2.4514e+06	2.37836e+06	2.31581e+06	1.94911e+06
6953.21	12614.6	10576.3	10843.9	12429.5	11008.7	9917.62	11152.8	12099.7	4503.73	7179.71	2960.11	1951.73	491.603	695.99	922.427	1277	1375.66	3330.64	4133.38	5821.21	7900.28	13376.3	18132.4	24022.9	27728.1	29396.5	39061.1	74916.6	67019.1	139469	138824	220981	265788	354107	544362	701302	814407	826965	977773	950634	868448	881221	821986	548956	481310	552421	346373	187378	512853
10864.4	9073.61	11420.4	17473.4	30178.9	29664.2	31311.7	33824.8	33927.7	44270.6	45051.4	42373.3	47627.2	37120.1	29952.2	42064.4	34934.9	28984.4	19800.1	23733.3	27563.6	66063.4	27299	9876.54	25154.6	62712.5	181841	220191	795524	975073	974848	1.35763e+06	1.35979e+06	1.74036e+06	1.64621e+06	942051	1.29795e+06	949687	967560	581369	472312	952801	1.08195e+06	742497	1.27158e+06	369222	140735	312362	372084	362793
13273.2	19429.3	18420.6	22168.1	23156.4	23609.5	22559.4	21056.1	13582.3	7015.01	3824.47	2610.19	2486.7	3289.25	4730.1	5574.17	17526.6	79286	75001	58153	49857.9	197051	220421	95547.1	195193	383435	645058	718489	988684	941659	829805	621906	596266	644183	748872	920662	600255	509560	355006	210057	219625	572018	263613	216188	179260	218369	324627	315240	651229	456367
10658.7	16402.7	17349.8	17308.6	17905.8	17885.2	12696.7	6315.22	1972.08	2136.77	3392.26	4421.44	3680.57	4153.86	3680.26	5244.78	80939.3	87784.2	40993.7	72880.3	123662	744935	2.31221e+07	1.28005e+06	1.05599e+06	1.046e+06	530541	356205	659890	1.22148e+06	1.36951e+06	1.26315e+06	946279	600186	436007	1.13992e+06	674376	211641	90896.5	61886.6	102405	260533	388421	132374	113218	63869.1	60633	36152.4	50924.7	38150.6
7900.28	13149.8	15332.1	13149.7	11729.3	14035.1	10308.7	9979.49	9382.33	15290.9	11400	8991.14	4215.6	4009.83	6541.6	98149.5	117815	334299	409919	350753	328131	751748	1.66023e+06	2.00186e+06	1.97478e+06	1.67924e+06	1.54803e+06	1.54449e+06	1.88275e+06	2.05003e+06	1.49049e+06	683604	633671	706140	1.28593e+06	1.27022e+06	922327	995768	630095	209292	122885	21201.7	43303.2	10638.4	22642.4	16258.8	17597.2	17844	12944.3	13912.4
5697.66	12449.8	12285.3	7467.95	5615.31	6397.57	6253.35	32545.9	11195.5	7817.75	5594.71	10309.2	40478.1	28057.8	229031	82464.6	369693	823852	1.37056e+06	2.00345e+06	1.97591e+06	2.04542e+06	1.96299e+06	1.88159e+06	1.99257e+06	1.89551e+06	2.02772e+06	2.07854e+06	2.08547e+06	2.45755e+06	2.33186e+06	1.06649e+06	1.02958e+06	1.40706e+06	1.10508e+06	716961	683348	810701	835047	361554	36265.2	2651.33	1725.16	2466.04	2795.3	4668.48	5388.87	19229.7	6870.98	7673.85
2754.22	8353.1	9382.4	7797.34	4750.7	5697.6	4956.6	4853.77	15292.5	10041.9	5944.76	8888.32	14652.8	33557.1	69808.7	8.58924e+06	7.8948e+06	2.96975e+06	2.49175e+06	689359	7.96815e+06	3.78803e+06	2.24841e+06	1.87777e+06	1.97254e+06	2.16883e+06	2.02277e+06	2.2783e+06	2.3512e+06	1.86009e+06	1.00394e+06	1.43674e+06	1.4399e+06	1.15649e+06	419427	74923.1	20419.1	12491	10432.9	3165.95	2980.59	6294.74	3248.17	2939.39	1930.88	2569.05	2795.42	3886.22	9259.34	10144.1
12473.4	7468.07	12367.8	12902.8	15891.7	22936.5	13933.2	17165.5	20562.3	90178.2	75023.8	208404	645790	538411	286991	482228	777063	569526	2.33757e+06	868093	1.94563e+06	2.26564e+06	1.70624e+06	1.72908e+06	1.99588e+06	2.03376e+06	1.8896e+06	2.06249e+06	2.1334e+06	1.43325e+06	1.42274e+06	1.48182e+06	655512	183734	23385.9	3453.95	15089.6	23487.8	12429.6	2857.1	3907.01	4957.03	4318.74	3701.11	21684.9	5924.15	4853.71	7550.36	7406.21	7303.2
4359.94	2816.02	3639.36	3803.87	4112.78	7159.78	6397.63	28499.6	18194	27584.9	23691.9	31888.8	85441.5	544894	288748	1.01306e+06	6.95806e+06	4.55279e+06	2.77265e+06	3.1964e+06	2.41537e+06	2.20295e+06	1.65243e+06	1.26493e+06	1.80381e+06	1.94532e+06	2.4025e+06	2.28953e+06	1.54937e+06	1.11873e+06	793390	701362	161762	16507.6	2548.32	1951.6	3783.46	2671.99	10741.6	11914.7	5389	3742.19	3186.37	4751.2	7592.37	5080.21	8559.12	5574.23	7612.16	30123.6
1889.86	4031.3	1807.45	2280.74	1889.8	13130	21097.2	17350.1	35206	34916.3	31869.2	65804.8	188750	71479.4	126509	279614	415000	9.55986e+06	1.50581e+06	2.04283e+06	994369	1.01827e+06	2.06496e+06	4.16694e+06	1.69424e+06	1.75815e+06	2.17913e+06	1.36956e+06	1.76524e+06	915274	676344	105642	8024.21	2219.06	1066.64	1745.89	2013.35	41124.2	41797.1	46659.9	10144.9	1766.18	6479.85	3268.78	14736.6	5615.25	6500.52	8785.49	12388.2	21880.2
2136.9	1827.99	2198.52	2301.41	10103.1	56758.6	30820.5	42564.7	36420.7	16485.4	36668.3	52842.4	125188	78811.9	159844	202353	441761	680192	515818	714751	932194	992556	1.38734e+06	872347	896917	899867	4.41417e+06	1.19757e+06	5.38112e+06	532504	82886.9	11358.8	3886.28	1992.62	20837.2	7448.15	19121.9	44230.6	89483.6	62775.9	34485.1	7427.24	3659.91	6377.09	6418.48	7653.43	11358.9	53839.8	104957	372466
696.893	4009.83	22236.2	14653.6	22353.7	11132.4	42438.3	89600	29171.5	14756	72110.3	40418.5	59793.5	64054.1	118478	165534	563587	435472	2.97233e+06	4.79599e+06	4.62189e+06	1.29657e+06	1.82207e+06	1.84323e+06	1.74381e+06	1.41968e+06	814592	739235	1.33212e+06	419994	221774	142674	73927	37883.9	14858.7	27732.1	106650	191532	162680	91086.2	63605.3	9300.49	4277.47	11364.6	5820.96	11873.4	181060	124776	157099	296062
2095.69	2671.99	2404.29	2692.53	2507.18	4380.3	65025.5	37863.3	16114.7	10329.4	10555.7	43022.2	35060.6	62032.1	60237.9	71871.9	391856	1.05356e+06	1.11208e+06	1.00731e+06	1.00797e+06	1.30369e+06	1.35889e+06	2.06227e+06	1.30727e+06	364853	398835	301472	33598.7	58106.9	19903.2	64311.4	153673	214905	269733	601636	837681	787823	715395	375622	135808	95686.8	18400.4	13520.7	30705.6	71725.2	379167	668543	1.0612e+06	1.40479e+06
235
0	0	0	20.432	0	0	40.865	0	20.432	41.076	0	0	0	81.729	81.941	122.743	54.486	164.091	81.941	164.45	143.597	61.297	41.076	185.032	226.108	637.816	555.306	472.919	1668.86	4164.25	5999.81	7031.29	7484.82	8083.22	9898.2	8743.18	10104.7	11363.1	9423.84	12044.3	13941.6	9506.35	7485.06	7278.63	7196.25	5216.18	7918.14	6041.04	16665	8268.88
0	0	0	0	41.013	41.076	0	20.432	61.508	164.24	225.896	184.883	102.373	82.151	204.981	287.553	36.324	102.583	61.446	184.821	164.091	185.032	61.446	102.732	266.823	225.747	452.301	761.489	988.253	2184.44	3071.28	6886.85	7691.12	10022.1	8083.22	13653.1	20606.9	13116.2	12332.2	12683	9052.57	9898.32	12064.2	7299.4	4617.97	7175.48	10104.6	10332	13570.4	11115.3
0	0	20.432	0	0	20.432	123.227	225.959	81.729	184.673	61.446	61.508	0	82.089	205.254	184.821	54.486	328.839	123.164	205.315	164.389	20.432	0	184.97	102.522	390.768	740.908	1029.54	1277.07	2865.04	6990.06	11651.7	12745	12291.1	9980.89	10372.7	10888.4	8681.18	12435.6	9980.71	10970.8	11301.1	15859.9	9754	3359.85	5999.88	9155.67	15324.2	17283.7	10022
20.432	0	0	0	20.432	20.432	102.732	143.448	143.659	185.243	123.016	20.432	40.865	20.432	0	0	18.162	122.954	61.297	123.016	143.597	81.941	123.164	0	61.297	205.105	617.384	1359.52	4185.14	1380.04	3545.45	7216.77	11630.9	13982.6	15736.1	11961.1	6948.59	11300.9	11115.1	6309.34	6618.73	11074.1	14003.3	8165.67	4432.36	6618.55	9485.65	13136.7	14353.8	14209.6
0	0	0	0	20.432	0	0	41.076	0	20.432	0	20.432	0	0	0	0	18.162	20.432	0	0	61.508	40.865	164.24	102.522	225.896	164.24	143.659	1091.53	1524.66	1524.54	1998.84	5711.12	12208.9	13322.4	15075.9	14787.1	15385.5	16086.7	17056.4	12992.5	10269.6	10888.3	11548.5	9444.48	7216.77	8083.22	9877.55	11094.8	11094.6	11280.3
20.432	20.432	0	0	0	0	0	0	20.432	0	0	0	0	0	61.508	0	0	267.48	0	20.432	41.076	40.865	102.583	61.508	41.076	205.042	123.227	164.178	370.002	926.447	1462.73	2184.5	3318.63	6288.69	8413.14	9692.01	12353	12992.4	15736	12332.4	9031.87	9155.73	9052.64	8268.57	7423.07	9630.02	9898.26	10744	9671.37	9918.9
0	0	0	0	0	0	0	41.076	0	0	40.865	0	0	20.432	0	20.432	0	20.432	20.432	0	0	226.108	0	20.432	20.432	41.076	81.941	287.826	473.006	761.551	988.439	2060.7	5587.32	3112.51	4391.08	7361.14	10558.2	9031.93	7876.79	8062.57	6433.2	5381.08	6618.67	6144.19	6762.86	7835.62	7278.76	7340.62	9712.84	10702.7
0	0	0	0	0	0	0	40.865	0	0	41.076	0	0	20.432	61.297	61.508	90.943	102.583	287.132	205.526	637.692	5423.11	38767.9	3545.7	164.24	20.432	102.583	369.914	720.476	741.181	1112.11	844.061	1483.32	2596.93	5133.61	5484.3	5917.3	7072.39	5422.3	4535.33	3834.34	5958.71	10661.5	11486.5	9671.31	10331.4	10785.3	7464.23	5855.56	8103.74
41.076	20.432	0	0	20.432	0	0	0	0	0	0	0	61.719	82.151	61.297	41.076	200.984	225.202	1545.06	2761.95	2390.8	6082.88	5958.78	5814.34	3401.33	1586.62	1400.87	720.388	431.782	431.72	782.07	740.845	740.908	2741.18	12229.3	14003.1	13240	8516.29	4411.66	5504.94	8825.75	11280.2	12786.1	16932.7	14519	10682.2	11321.5	10950.3	7505.65	7464.3
0	0	0	0	0	0	61.719	0	0	0	0	0	0	0	61.657	143.448	109.16	143.659	184.461	575.887	699.559	802.837	1936.9	6701.31	7319.98	5731.89	1359.58	596.679	782.256	410.99	266.823	596.592	658.336	1627.63	4102.26	13157.6	18542	18789.5	15261.6	14869.6	16025	18170.6	17634.2	18459.4	17943.5	14518.8	13755.7	12703.6	11074	9011.48
0	20.432	0	0	0	0	0	0	82.3	20.432	0	0	20.432	41.013	82.151	20.432	0	0	0	40.865	40.865	246.477	205.402	596.53	1462.73	1297.71	3030.06	1998.71	905.866	658.46	576.036	452.363	885.1	1854.52	2926.84	6144.25	12641.9	20006.7	17221.5	17902.3	19202.1	21100.2	20646.5	21780.9	21017.8	19635.5	16004.3	13735	13178.1	10248.9
0	0	0	0	0	82.151	0	41.076	0	0	0	0	20.432	61.508	123.164	102.583	18.162	40.865	40.865	61.446	61.508	40.865	246.118	802.837	926.386	637.965	864.704	988.439	885.496	802.775	761.551	1359.64	1545.12	3153.67	4886.27	5504.75	7629.38	7814.98	8640.15	10145.8	12435.4	15963	17923	15034.7	14147.6	14106.4	12146.7	10579	11156.4	11548.5
0	0	0	0	0	0	20.432	20.432	41.076	0	0	0	308.766	431.993	61.508	40.865	0	0	143.535	122.892	61.297	123.016	328.901	1008.9	1029.81	823.294	740.845	699.622	658.67	699.559	1111.99	1421.39	2679.44	3133.21	5628.61	7319.98	8268.76	7732.53	8227.53	9011.35	9300.11	10331.4	13549.5	15406.1	17902.3	16313.9	13281.3	11857.9	10640.9	11177.2
0	0	0	0	0	41.076	0	20.432	0	0	0	0	20.432	20.432	0	0	73.023	40.865	308.617	266.91	472.795	0	267.121	1070.95	1194.56	1421.39	1338.88	967.672	1070.89	1132.75	1648.21	2163.79	3112.38	5051.04	6907.37	9052.57	10083.9	9526.93	12910	16705.8	18748.3	16313.8	16169.4	15756.6	14292.1	15509.2	15880.5	15447.3	21492.2	21079.6
20.432	102.732	0	0	0	0	0	20.432	20.432	0	0	20.432	0	40.865	61.508	0	0	40.865	143.175	390.496	184.883	102.583	432.079	699.559	514.02	699.746	637.816	761.489	885.285	1400.74	1833.81	4370.5	4968.65	6309.34	6639.38	8805.17	10847	11734.1	15261.7	19099.2	18768.9	16643.8	16375.7	16355	17159.7	17407.2	17097.6	18088.1	17923	14766.4
20.432	164.24	164.45	164.029	61.297	164.24	102.373	164.029	81.941	20.432	40.865	20.432	0	0	0	20.432	0	0	41.013	40.865	61.508	20.432	81.941	102.373	205.526	287.764	82.3	266.823	699.498	576.097	988.315	741.118	1813.17	2019.48	2700.02	4122.97	5669.84	6701.18	5484.3	6041.04	6989.94	6267.93	5649.25	5566.81	4287.99	3834.21	3607.51	2390.68	1442.03	3483.84
123.164	20.432	123.313	61.297	225.896	287.342	81.878	226.108	184.883	431.93	534.75	349.148	225.896	266.972	184.883	617.049	365.457	225.537	102.373	81.941	246.329	617.111	164.24	123.016	143.597	390.558	1462.67	3091.99	6123.8	6103.15	7051.81	11507.6	9238.11	12187.9	14622.4	7856.27	9568.28	6577.45	6742.53	4906.85	3463.19	7526.47	7649.96	5504.88	8660.98	3174.38	1112.11	3091.99	2823.75	2411.32
205.166	102.583	143.597	123.164	163.967	184.673	123.016	20.432	102.732	81.729	82.151	143.808	20.432	20.432	61.297	82.151	109.237	514.081	761.613	308.047	328.839	1854.7	1957.55	844.272	1029.54	2906.2	5257.41	5257.47	7216.83	7031.1	6350.56	4865.44	4473.59	4762.22	5113.15	6762.99	4308.75	3896.14	2658.92	1400.74	1710.14	4123.09	2349.39	1441.97	1236.06	1710.08	2019.42	2844.4	4886.2	3463.01
102.522	81.941	41.076	164.029	164.24	143.597	123.164	20.432	41.076	0	81.941	102.732	61.446	0	20.432	20.432	786.865	596.53	164.45	514.169	1153.34	6436.51	175983	9403.26	7670.73	8000.65	3586.93	2370.04	5319.46	8351.27	9341.39	9485.71	6866.08	3834.27	3009.29	8454.42	5504.88	1503.83	843.875	534.687	905.929	1792.59	3504.29	988.377	947.152	410.953	267.182	266.972	452.301	308.072
82.089	102.373	308.047	61.297	20.432	61.508	81.941	82.3	184.461	40.865	61.297	40.865	20.432	0	20.432	494.071	1043.24	2431.84	2968.19	2700.02	2019.48	5401.72	13219.4	14931.8	14684.1	12229.2	11300.9	11838.1	12579.8	14849.1	10537.6	5298.63	4782.99	4865.68	9485.83	9733.18	7423.13	7526.23	5339.92	1689.56	534.811	205.042	452.996	122.954	246.267	0	20.432	164.091	102.583	61.297
0	102.373	20.432	20.432	82.151	0	20.432	122.954	61.508	20.432	40.865	20.432	328.691	82.089	2122.51	740.908	2894.82	6990	9300.04	14106.4	13693.9	14704.8	14725.6	14333.5	14745.9	13879.5	14993.4	15447.4	14168.5	19140.2	16973.9	8392.61	6680.54	10414	9135.15	5154.25	4824.21	6783.76	6309.21	2658.79	349.842	61.508	0	40.865	40.865	0	41.076	82.089	123.164	102.583
20.432	41.013	123.376	102.522	20.432	40.865	41.076	41.076	184.883	122.805	102.732	123.164	102.162	184.734	555.814	67189.4	57432.5	21577.6	12540.5	4886.14	51975	25106.2	17572.2	14642.8	13961.9	16045.7	15447.3	17159.7	17881.6	14849.1	7113.61	8990.65	10104.6	8433.65	3607.57	782.256	81.729	102.732	40.865	20.432	61.508	20.432	0	0	0	0	41.076	20.432	102.583	0
102.732	61.508	164.302	102.373	102.583	102.373	61.446	123.016	225.959	452.214	390.372	1668.98	5298.76	3793.05	2411.26	3793.05	6286.55	4411.91	19410.7	5876.45	14188.7	16953.4	12827.5	13920.8	14209.5	14746	13384.3	15715.5	15839.3	10413.9	11197.9	9753.82	4679.9	1380.16	164.029	0	41.013	287.764	61.508	0	123.227	41.076	0	20.432	82.089	102.732	20.432	123.164	41.076	61.508
0	40.865	0	0	82.3	61.297	20.432	164.178	40.865	164.091	61.508	267.394	596.716	2865.04	2060.7	7608.8	51992.2	38462.5	20316.6	21533.7	17696.1	16540.8	10847.1	9279.46	12765.5	14230.1	15096.7	16148.8	10393.4	9485.58	5876.2	5030.52	1009.29	61.297	0	20.432	0	0	61.508	61.508	102.373	0	40.865	0	41.076	61.446	143.597	61.297	82.151	143.659
0	0	20.432	20.432	20.432	1072.21	143.386	102.373	349.421	349.272	287.404	658.397	1215.14	761.551	926.447	1689.44	3609.57	102131	11693.3	16046.4	7650.02	9218.09	15984.5	22489.6	11610.4	13446.4	13652.6	10785.4	12044.1	6598.03	4040.7	782.467	102.794	0	20.432	0	0	370.398	205.166	225.747	61.508	20.432	61.297	20.432	82.151	40.865	40.865	184.673	123.227	40.865
0	0	0	40.865	61.446	555.665	143.808	370.063	308.345	123.164	143.386	514.441	679.189	555.516	1132.75	1338.94	2839.88	5546.16	4721.12	5896.85	6618.67	6453.71	12584.5	6371.14	6267.99	5381.14	35139.6	6474.11	35307.5	2040.06	225.686	40.865	0	0	143.808	226.467	61.508	267.331	473.006	575.887	246.391	102.162	40.865	41.076	40.865	0	61.508	225.475	596.617	2493.84
0	82.151	143.869	20.432	184.461	143.659	349.482	679.127	143.597	102.583	514.379	411.288	493.464	555.182	1050.18	1256.43	2693.14	2411.2	24058.5	27708.8	56336.8	9300.11	12621.2	13900.2	13157.5	10971	5896.72	4906.72	8764	3586.8	1813.36	823.567	617.111	225.686	82.089	205.254	679.041	1895.81	1112.05	617.173	431.806	82.151	0	82.089	61.297	61.508	1174.1	926.51	947.091	2267.07
61.719	20.432	0	0	40.865	40.865	576.097	184.821	122.954	20.432	40.865	164.091	184.883	411.077	431.844	555.516	2473.23	6680.6	7464.3	7196.25	7711.83	10661.7	10331.3	20340.9	9857.47	2700.08	2658.79	2452.61	308.196	349.272	205.254	349.421	1132.69	1648.34	1772.01	4597.32	5484.23	6144.32	5216.12	2596.93	1029.6	617.322	123.016	184.673	184.61	617.384	2782.59	4906.72	8103.86	10331.5
232
162.676	223.542	162.799	655.484	9029.7	29263.5	33710.1	47674.1	67738.7	23664.4	16397.2	26936.9	39991.7	68686.1	73157.7	68315.6	44057	51359.9	55705.8	44995.1	24075	20761	16932.5	23087	31528	38634.6	11972.7	1271.86	511.503	244.627	20.105	122.099	60.804	183.27	40.7	80.419	182.351	327.375	366.665	1066.1	902.38	388.18	490.603	1148.36	1436.44	531.241	1456.97	1436.57	10243.9	3411.79
839.86	449.351	943.203	8617.92	27307.4	36881.2	25125.1	40795.4	67346.1	74331.9	68850.8	65100.5	56550.8	38467.3	28563.2	59270.2	62312.2	58198.5	61206.5	63102.4	48497.1	28192.4	11355	11931	18908.4	17118	5675.03	1909.76	2588.6	1004.37	593.884	675.651	428.818	122.037	60.804	224.4	265.099	265.099	3166	387.198	551.775	448.922	572.736	1148.48	819.264	1169.01	1395.44	1889.1	3761.41	3781.95
942.651	757.541	839.736	2814.96	12157.3	26792.9	49423.9	72725.3	84101.6	82390.9	49569.2	18229.3	16644.1	23086.9	22654.7	20863.8	27565.9	28954.3	24034	21707.6	15862.2	7753.48	3123.45	9585.34	27677.9	17384.9	5428.14	1518.88	757.479	448.798	203.375	20.105	20.105	20.105	40.7	101.013	101.013	80.908	264.18	285.694	203.375	736.822	1642.15	778.136	901.584	1004.37	1971.36	5345.88	4810.78	4481.62
1107.35	736.946	1271.8	1045.57	1765.65	6436.62	20431.7	23210.4	19978.8	13742.2	8782.62	6518.82	2115.34	2547.47	1642.21	778.013	654.517	1786.25	7651.8	10655.1	9255.82	6107.16	4049.68	3535.11	4790.43	11663.5	12692.4	5736.94	1375.08	182.351	121.547	60.314	20.105	121.056	162.799	40.209	121.975	80.908	182.903	223.603	388.056	6315.9	922.117	983.779	1086.69	1251.27	3082.51	3905.52	4646.2	4851.91
182.412	142.142	244.075	942.712	1395.31	901.584	613.989	510.584	203.008	141.713	284.713	142.204	40.7	80.908	60.804	183.333	399.533	345.946	613.312	2773.77	1991.95	2526.87	6827.38	6148.48	5654.5	9461.52	17941.1	18332	11087.9	5860.21	3103.11	367.827	183.333	80.419	223.97	81.338	101.504	223.479	60.314	326.027	264.608	448.798	2300.57	2835.99	1333.53	1930.23	2691.51	4028.96	3555.77	5098.8
20.105	60.804	60.804	0	0	0	0	0	61.295	20.105	0	61.233	60.804	20.105	80.419	101.871	126.294	2938.59	1703.99	4440.56	7609.31	12281.1	9043.3	10595.9	7781.11	15383	39702.2	25557.3	21998.6	25804.8	28275.9	631190	129985	3350.62	203.866	60.314	244.994	101.013	285.694	284.284	100.522	1004.37	922.055	963.245	1189.55	2012.61	3432.07	3781.95	3782.01	5736.82
0	0	60.804	81.399	141.713	20.105	0	0	40.7	0	20.105	81.399	101.504	60.314	122.037	2218.19	8135.31	21605	26298.5	14812.3	27410.4	22016.6	17488	17879	15635.6	25351.3	22366.7	15060	29452.6	21852	26814.1	61159.8	195433	45314.3	572.799	40.7	163.166	161.818	142.632	244.136	4584.54	553.122	531.118	634.032	1127.82	1703.93	1971.48	10020.7	17243.7	6662.8
224.952	40.7	101.933	40.209	80.908	655.117	1025.03	593.026	244.994	449.413	387.689	387.565	325.841	819.57	9832.11	18908.2	31208.5	38096.6	29283.7	27904.4	51174.4	140408	446733	92796.4	32907.2	36963.4	23540.1	16747.3	19155.7	19402.6	14856.2	18847.4	26002	7948.68	1477.94	161.818	122.037	101.504	162.309	346.989	223.542	244.994	902.075	1436.38	1477.63	1642.21	2856.03	3391.13	1950.83	2321.29
121.609	60.314	162.246	60.314	244.075	101.504	223.603	121.118	120.627	183.823	224.032	366.665	243.523	984.332	1354.18	3226.43	10220.9	24528.1	64462.9	223763	110208	552752	286707	158964	97412.1	47472.2	32948.7	17262.1	8844.1	7239.1	6701.68	16234.4	7291.57	2527.06	1580.61	182.289	182.351	60.314	100.522	223.418	491.461	552.694	2403.67	2259.38	2115.4	1868.38	2135.94	3226.49	3514.52	2609.25
265.59	162.246	182.412	40.7	0	20.105	0	20.105	20.105	60.314	20.105	122.099	512.423	3514.58	9111.96	13392.2	12159.7	14709.6	21049.8	47528.5	62567.1	59626.2	114586	348172	294329	217133	54334.9	12280.8	20886	27378.9	4131.75	1436.5	264.67	284.775	880.927	840.227	368.075	264.18	305.86	366.908	942.712	675.16	4275.8	41282.6	1148.42	2177.25	1251.27	1745.12	2053.55	3103.05
285.265	182.78	141.652	265.099	778.627	1827.38	1374.78	1518.82	388.117	121.547	182.78	449.227	6930.48	16767.7	21975.7	11128.4	3617.37	1601.08	1992.08	6169.13	13371.8	29469.1	28995.6	20905	47510.7	49343.6	525259	97204.1	20783.7	19303.1	922.179	101.933	203.008	122.099	163.656	1186.6	1251.45	449.227	428.879	304.941	1395.31	1086.63	1127.76	1127.88	1127.76	1374.72	1415.91	2115.53	2814.96	2382.83
285.265	121.609	819.203	2670.92	3185.36	9482.06	10264.1	7691.69	3658.5	2382.77	2403.43	3452.85	4440.56	10017.6	19525.8	8823.94	2209.22	8021.22	26442.7	27677.7	44544.1	64793.4	108605	80763.8	22408.7	9914.31	7980.03	9318.1	5057.8	1662.74	306.227	162.676	223.97	142.142	265.223	162.737	80.419	285.142	265.16	490.418	1354.12	1313.12	1004.31	2259.45	3555.71	5181.37	5345.94	5736.7	4028.84	2959
449.289	367.399	285.265	1436.5	5942.52	12610.3	16582.7	7856.46	1848.04	860.761	1724.4	3164.89	11087.5	27493.1	32124.9	11169.6	7568.35	39189.4	59187.8	37541	28542.3	18681.9	12178.1	13927.6	10161.1	5140.12	1868.57	1025.03	306.29	182.78	326.823	162.185	162.737	60.804	162.309	223.542	285.694	306.351	244.075	572.432	551.775	1190.04	696.246	675.16	1127.82	1004.44	1004.44	839.922	1127.95	1045.57
799.222	654.994	326.393	757.541	4214.14	8844.1	7424.27	7012.61	3967.18	2218.19	3185.24	2938.47	3103.17	11128.6	4234.67	3288.28	17320	50619	70890.9	71014.7	75754.4	50020.7	30404.5	24363.5	11231.4	4893.03	1868.51	819.203	305.86	142.142	81.399	162.309	20.105	244.994	203.375	182.842	80.908	265.037	470.008	634.032	388.547	429.184	716.78	572.86	634.032	716.413	778.198	819.264	1148.36	1189.55
3596.84	3000.13	1519.31	428.694	902.075	2958.88	5078.39	4440.37	2403.61	1189.55	511.565	922.546	1765.65	2115.4	1703.87	2465.21	3324.73	7918.12	26484.7	47755	37561.4	14709.4	22079.4	11375.4	4563.82	3452.73	3535.11	3411.73	758.031	614.479	162.737	449.841	285.756	244.136	428.879	347.356	222.989	326.332	367.032	244.503	407.67	407.731	305.736	387.322	778.074	778.504	470.374	737.007	880.988	3308.75
30478.2	17055.8	15491.7	8967.67	10572.7	11622.4	8473.63	7136.06	5345.82	5736.88	3370.47	2732.76	1415.85	716.289	634.46	1251.27	1678.77	1415.91	2485.74	8144.48	10572.7	10469.9	17488	14050.9	11005	9688.07	10552.5	12260.4	26381	38367.1	19052.7	10647.6	5629.93	3446.89	1786.19	6004.37	8497.34	14570.6	18414.3	20554.2	32333.6	31630.8	28993.5	34960.2	44758.2	22593	16708.1	9749.61	3761.6	592.965
60011.5	58137	71344.3	100596	106287	112599	105565	101359	102349	79135.3	40197.8	16397.4	6333.52	6354.24	4584.48	8535.3	7806.01	7012.61	5695.69	5860.33	14442.1	24095.8	20616.7	15862.2	8700.06	21008.1	67839.9	71271.2	168455	336178	258234	305633	254260	352046	409148	345483	264465	191239	174276	245084	207534	261471	196008	176057	318446	103693	63004	43994.6	19717.5	12425.2
70540.5	99894.6	114723	134511	129968	140286	132283	128566	80559.4	32537.6	6745.43	634.523	1498.72	4317.05	10243.5	16232.5	16587	23066.5	18723	21773.6	19711.3	60562.1	60320.7	58851.8	46177.1	55487.6	238804	149089	325431	170305	87808.7	53408.5	25486.3	16592.7	12260.1	9667.48	15574.2	91089.7	82042.3	86970	90039.3	140027	99877.4	73590.7	83795.6	116300	84351.4	79301.3	131773	80207.1
60217.7	90266.1	103070	104740	105979	105442	74828.9	30561.6	6992.08	3226.49	9687.88	19196.6	15821	14154	15121.2	9873.06	20265.1	31653.3	12384.2	9482.24	4913.69	13724.1	6742.91	6683.64	5240.66	1745.06	3000.32	1189.61	819.632	470.008	551.712	511.503	736.822	1108.15	2629.79	17049.7	20472.7	39953.1	61968.7	63287.6	64070.4	106797	121938	60815.7	58096.8	50123.7	52430.7	44192	61621.7	67372.2
45366.8	84927.1	91729.7	81731.2	80617.9	86801.7	64813.8	40547.4	15676.9	10819.7	6374.65	9420.21	8144.54	9523.25	13495.2	26587.8	14143.1	19826.4	758.889	60.804	80.908	80.908	122.037	224.032	244.503	387.137	387.198	572.799	819.632	1004.37	1086.76	469.946	943.142	839.736	1909.76	12424.3	24961.6	70049.5	77959.4	76351.4	55912.6	57540.6	40940	39394.5	38734.7	54646.9	55790.9	40877.6	43862.6	49694.6
29305.1	70025.7	74414.9	52904.6	42894.4	44130	41349.9	34389.5	20411.1	14050.9	10778.6	14894.9	13454	16088.4	22345.8	14929.8	6373.39	305.799	40.209	122.037	121.056	387.627	162.737	203.375	305.308	326.332	757.541	922.179	922.117	1107.1	675.16	552.755	675.16	1210.2	2279.98	19549.6	84113.9	75032.7	91566.2	75076.3	72301.5	33813.6	47776.5	51277.7	45431.2	34492.9	42525.6	47575.3	57834.3	35934.2
15409.8	47652.5	55294	42400.4	27636.4	30909.9	30951.2	22716.6	14339	8700.12	8556.2	16603.2	22387.2	15718.1	8602.25	16830.6	1642.26	348.828	101.013	101.504	163.656	223.97	141.713	285.327	408.222	407.794	634.093	778.993	1621.67	1024.97	737.374	901.584	1436.38	1991.89	16789.6	49825	72605	50783.2	70581.9	50371.3	51279.3	79203.7	61559.6	55048.6	51792.2	50968.9	39682.6	35069.2	26566.4	26875.1
5654.38	19896.7	33936.6	34822.3	20863.7	16726.5	12157.3	24179.8	15882.8	17922.4	15079.9	13618.5	24861.5	37694.1	27009.6	23694.3	54.049	0	367.584	60.314	121.609	490.542	469.455	285.203	449.413	449.289	429.246	1025.03	1251.33	736.946	305.308	819.203	2382.89	13106.9	44504.1	71138.9	48703	53030.7	44690.7	46095.8	40816.2	46974	37027.9	57273.5	47652.8	36654.8	41703.8	37810.1	87922.5	38261
4481.62	5675.1	11272.4	16150.7	4605.01	3226.49	4255.14	9564.56	10161.1	10613.9	10902	17344.2	15141.7	9790.92	4719	1107.78	437.616	244.566	101.442	285.079	223.542	142.08	346.498	101.013	224.4	366.727	613.498	654.626	798.67	1333.65	1127.82	4564.01	18867.5	45738.1	56510.2	44006.6	61604	37190.5	33730.8	45758.1	41453	41309.5	36266.4	26442.6	48175.8	38426.9	35565.4	29099	43906.1	42606.4
1642.15	3617.37	7300.82	10593.2	4111.35	1478.06	1477.57	5160.59	10737.4	13371.8	15779.7	10531.8	53176.4	7839.7	675.098	101.013	89.79	573.227	81.399	162.737	81.338	20.105	306.718	409.632	408.161	264.67	572.369	717.208	1436.57	1539.36	4008.31	13289.9	48414.5	51956.7	44130.3	36881.7	47345.6	39232.3	29366.1	30024.8	27163.3	38077.1	36594.1	24260.3	48231.8	44569.4	45779.8	55872.6	67752.2	47075.7
388.117	3432.26	3967.12	4275.86	3493.92	49891.9	26234.4	20229	17035.3	15697.4	16808.8	19588.6	7735.74	2444.55	490.051	285.327	235.262	20.105	141.713	60.804	101.442	161.755	285.203	142.142	182.78	224.4	922.608	840.227	2153.38	5260.35	19939	86064.6	88639.2	68419.1	72568.4	47968	45078.7	39848.1	23479.3	23930.9	43143.5	43064.9	58188.7	73953.9	45407.2	70327.6	50762.2	78392.8	60320.9	88643.3
265.16	3638.03	14483.2	12857.1	16129.9	10367	18476.1	10305.4	8391.44	12548.5	26072.2	25104.6	14400.8	5202.15	1395.37	1086.76	1057.32	101.442	202.884	304.879	408.589	305.799	182.842	141.222	449.475	428.818	1105.24	6502.65	120934	117102	100083	75734.5	68170.6	64279.7	46499.4	40320.7	56369.3	29346	10522.1	9318.59	23766.7	25619.1	36841.3	54203	50886.2	78970.6	122729	111560	80826.5	71932.5
613.989	1498.04	983.717	1045.57	1148.29	2135.94	4543.35	12445.8	19937.3	19731.6	14338.9	18126.4	15759.2	10531.9	3555.71	983.779	381.607	141.713	203.437	407.731	122.528	244.627	244.075	448.798	881.479	1907.91	27949.8	73018	49959.3	46316.1	48147.1	48352.5	56242.5	82296.8	96888.7	92791.3	43194	6971.67	1868.57	1889.04	9306.42	44379.5	50722.2	62382.6	58220.9	69388	100855	113457	68539	16110.8
208
3133.51	3399.52	4054.18	3849.55	4525	4095.2	4074.84	7104.15	4197.42	5179.72	5752.7	5568.49	5220.62	5936.85	4975.09	11851.3	10084.5	9825.14	11503.5	23522.2	114806	67619.1	20735.2	17398.3	52796.2	395723	564790	436983	1.05067e+06	574003	544434	673790	718927	535548	267949	160098	169643	142883	347716	269738	376334	275372	228891	207744	154648	94758.9	47213.2	15290.2	9682.02	20449.2
2335.6	2130.97	1782.98	2785.64	3051.64	2560.59	3010.74	2887.98	3072.06	2601.55	2478.6	2765.15	8454.19	12301.8	18442.2	20693.8	11940.1	8290.16	25405.9	18094.1	15719.7	24583.5	38488.8	54769.7	78322.5	186427	506536	495029	454538	727713	386023	454149	404734	786946	557057	358655	369716	304255	239332	226126	337934	448183	277234	141675	247871	250847	138916	40025.7	11135.1	9620.51
11155.7	6632.78	6612.24	5425.31	6305.32	8126.68	10377.8	10500.5	14327.9	8781.52	12772.7	26917.5	14552.9	19588.4	22802.7	39018.6	33831.1	25259.2	31179.7	16211	16539.7	12526.8	17500.6	26221.4	74616.5	4.01605e+06	1.1124e+06	541300	1.12486e+06	540364	596710	615949	699856	691879	628846	570012	556404	477084	506386	503035	518986	545392	276271	120952	247108	309434	219420	65702.3	19486.1	17479.9
12138.1	13365.9	16436.1	19178.9	16517.9	18073.5	18769.5	27307	14716.7	14716.7	17091	15494.5	9334.14	18073.6	15085.3	12178.9	9284.02	15965.5	21431.2	45982.8	58478.6	44609.9	43913.6	34779.9	38323.5	153867	3.40125e+06	8.36865e+07	4.81697e+07	664989	483727	456163	531717	560686	569432	996833	1.23536e+06	921237	751605	885714	833356	643359	177979	101749	186351	257342	228089	81006.1	54011.6	40227.3
5753.56	3338.07	4524.94	7492.19	5466.27	7902.37	8823.04	6530.37	4402.05	9253.08	9886.64	12364.3	9395.46	12731.8	15453.7	19998.2	18744.9	35231.7	31421.7	49547.7	86934.4	133622	190313	326002	448014	397207	158579	186527	1.21084e+08	1.83633e+08	8.16006e+07	4.29058e+06	1.03538e+06	861662	959420	1.05529e+06	998379	705751	473159	440639	464952	412378	233969	146501	120620	165738	159645	93341.4	84565.9	58376.5
22927.3	19895.9	20223.6	19465.7	32916.9	36255.8	24399.3	30562.6	39743.2	58314.8	55202.1	56656.8	79013.5	85782.5	104320	95520.4	1.6448e+06	164518	198280	322895	491036	658370	1.18826e+06	2.20192e+06	2.95381e+06	4.82272e+06	8.80373e+06	9.85204e+06	3.05712e+06	711284	748435	1.76174e+06	1.00716e+07	2.60724e+06	1.74049e+06	1.57732e+06	1.14327e+06	1.00943e+06	709395	478914	503293	499630	402300	246311	151631	100949	98322.8	114014	110035	78131.9
18383.7	12199.5	8515.39	12690.7	13284.2	15476.6	14184.6	16068.8	13222.7	32849.4	23072.7	16845.6	15924.8	52793.7	17418.6	28622	29627.2	26077.9	30562.2	35148.3	38322.8	43921	32629.9	32773.4	30705.1	118328	117599	415748	555384	739895	1.1291e+06	1.06473e+06	1.62411e+06	2.47154e+06	2.73424e+06	1.72654e+06	1.37765e+06	1.21526e+06	1.10458e+06	788855	608851	590906	459254	328708	270145	200776	145163	170440	141985	86106.1
6428.15	4831.85	5548.14	4790.82	6080.28	5200.2	6673.68	5486.69	5609.33	5609.46	7615.02	7799.16	6080.28	5466.15	5077.31	7717.3	7410.22	7983.37	326283	51739.9	121221	85001.2	125468	83312.3	16518.2	22621	176435	415630	500914	987137	7.98077e+06	1.25976e+06	2.05037e+06	1.40215e+07	2.88215e+06	1.31047e+06	1.05617e+06	1.07063e+06	964317	836090	856388	775196	525134	238005	243473	191439	100666	127436	194068	162641
7021.49	4197.42	5445.67	4688.6	5159.18	5159.3	5302.61	5548.2	5282	6141.48	6428.09	5507.11	7369.42	18254	9436.43	14881.4	19272.3	54960.9	66767	133246	319224	422869	383038	266987	110038	255354	556896	1.09867e+06	1.29936e+06	1.38007e+06	1.95626e+06	1.51503e+06	2.39106e+06	1.20288e+06	755107	660307	860978	1.13408e+06	1.16264e+06	963370	774623	737449	607737	282870	110322	145492	125318	94263.8	133999	168016
4627.22	4729.63	4709.21	4115.68	4647.58	5118.28	4299.77	4668.18	3665.47	4831.85	4770.47	5282	6100.39	10582.5	48957.6	105532	39877.8	9600.15	25178.2	55142.5	29252	34473.5	73973.5	401452	821790	573968	821903	898949	1.03899e+06	1.29871e+06	1.70693e+06	1.26152e+06	1.41717e+06	1.12527e+06	649901	334586	263311	454155	571764	591472	366622	252818	383817	347569	198110	87702.3	105358	98570.4	83848.2	105543
4954.73	4197.67	3747.39	3788.35	4709.02	3726.85	3726.91	4504.33	4975.09	5732.28	6223.4	6550.67	10766.7	31361.7	55427.5	41644.6	11485.4	7041.97	8126.55	11114.5	18073.8	60022.1	141543	261655	448815	713079	1.11106e+06	1.35379e+06	1.55244e+06	1.42119e+06	1.36623e+06	1.49624e+06	1.29616e+06	1.85193e+06	2.23718e+06	1.41833e+06	587152	724419	768244	410783	322197	185336	172823	249567	258083	174406	77883.6	102570	143093	193330
4320.25	3992.86	4524.94	3849.67	3481.32	3747.33	4852.45	4197.48	4422.59	4136.16	4975.15	7471.71	6571.27	8004.1	17357.2	5752.7	5482.24	6632.65	7717.36	11073.9	16538.4	28496.8	164120	517372	790920	957152	1.18079e+06	1.31683e+06	1.7339e+06	2.29746e+06	1.70111e+06	2.86024e+06	2.0989e+06	1.35331e+06	1.29693e+06	1.29871e+06	1.02479e+06	839248	654217	487850	874094	270581	244050	309976	400803	486206	522500	528807	579347	714139
4136.04	2785.64	3829.07	3604.08	3685.89	4443.07	3338.01	3849.67	4095.14	4688.66	3972.38	4770.59	30488	23541.2	12547.2	5834.38	6337.14	7778.74	8208.48	11339.7	17050.2	21104.2	107674	336256	640787	913059	1.98715e+06	1.79409e+06	1.32854e+06	2.90003e+06	2.2883e+06	2.33397e+06	1.55073e+06	1.30538e+06	1.20967e+06	1.27493e+06	996959	863386	678992	539395	439596	412136	348851	320253	344353	421048	505012	673283	854003	906605
3829.25	2683.29	3276.63	4668.06	4586.32	4156.58	5241.23	4586.2	4422.59	4095.14	4586.26	5056.9	4811.3	4340.73	7800.64	6858.07	5645.76	7819.52	8474.49	10214	20388	22741.1	617552	282357	535636	848143	1.13275e+06	1.22086e+06	1.5892e+06	1.31798e+06	2.45297e+06	1.36407e+06	1.99567e+06	1.31066e+06	1.31287e+06	1.02996e+06	904164	795687	616645	440529	366601	466693	573877	578078	658554	756964	734112	599879	324656	192878
5630.06	5670.84	3849.55	3829.19	4054.36	3563.12	3870.15	3133.57	3931.54	3542.58	4790.95	3522.28	4013.22	4197.48	4729.56	4831.91	4954.67	7164.8	35977.9	144216	21902.5	19056.3	208175	272562	352102	654626	1.23389e+06	1.40979e+06	2.77145e+06	3.01542e+06	2.27481e+06	2.75681e+06	1.86999e+06	1.6711e+06	907891	557373	526632	507427	461266	571268	698899	890636	978347	744772	515379	318054	223503	272037	316101	394181
4217.97	5241.1	4177	3440.36	3194.95	3399.46	3174.35	4913.65	4361.27	3808.71	3911.12	4463.56	4279.28	4893.23	5670.84	5343.32	5500.29	6407.61	8044.75	9579.55	9620.51	11421.6	25915.2	41230.5	98593.7	246806	467231	846520	1.26526e+06	1.75512e+06	2.43004e+06	2.14631e+06	2.66137e+06	3.15226e+06	3.9801e+06	6.29246e+06	6.98951e+06	2.85438e+06	1.87189e+06	1.62206e+06	1.26127e+06	1.08239e+06	3.25717e+06	6.74834e+06	3.83849e+06	7.12583e+06	4.20962e+06	708370	1.74004e+06	1.49114e+06
4647.58	4586.32	5507.11	5261.52	5834.56	6857.7	5486.69	5159.24	8454.13	7717.24	6939.57	9006.69	10398.6	7942.35	8924.95	18135.7	14669.1	17684.7	14716.7	12444.8	13038.4	28863.6	22536.3	21451.3	28535.5	41169.1	80738.2	107983	729707	620326	431173	713189	1.13991e+06	925283	1.77121e+06	1.11306e+07	4.64062e+06	817500	440825	453598	553971	446386	408179	382860	540976	737899	1.15728e+06	1.33325e+06	1.97203e+06	8.28527e+06
6367.51	2990.26	4586.44	3542.76	4729.63	5016.18	5384.35	4033.76	4504.27	4668.18	4422.59	6059.67	6694.04	6305.14	8965.67	8228.83	8119.75	8986.15	17399.1	34288.8	23459.5	103252	3.27107e+06	662828	5.84121e+06	1.91063e+07	1.25348e+08	2.31584e+07	1.26725e+07	1.20109e+07	1.60115e+07	1.13839e+07	5.22595e+06	3.46428e+06	4.84216e+06	4.16386e+06	2.47775e+07	1.36726e+07	390942	252838	405660	423880	337554	264998	379529	432269	385226	465281	443326	546497
14716.9	20899.5	20862.1	15985.9	19179.3	21758.7	25668.7	26385.3	26201.3	28002.4	39368.3	56521.8	50306.1	60425.8	75981.1	96610	136358	426179	751822	2.21682e+07	5.2579e+06	7.03355e+06	1.43886e+07	2.85579e+06	2.90965e+06	1.59359e+06	1.66106e+06	2.01352e+06	2.14334e+06	1.37854e+06	1.06248e+06	1.00624e+06	1.28872e+06	1.79142e+06	2.71146e+06	1.57233e+06	2.17475e+07	5.6904e+06	426560	328404	275896	339711	217114	161058	334830	410699	218175	228286	251809	238256
16231.4	13693.5	13407	15249.1	17173.2	20407.5	34354.4	32589.2	71375.4	44509.8	35332.7	50857.6	76104.3	121864	170838	509777	1.7952e+06	2.50832e+06	2.98712e+06	410266	213050	159974	626828	1.6576e+06	602562	699284	730900	482983	620128	505052	632653	965761	1.24296e+06	1.23079e+06	604388	823563	2.46216e+07	1.34025e+06	420292	329253	269288	139237	118375	65855	90742.9	112740	112641	124646	169302	184208
10316.4	8863.26	8413.23	13080.4	9006.57	12404	13427.7	13427.9	12015.2	16599.9	21635.8	19486.2	35866.5	64166.3	423531	2.81603e+06	4.69825e+06	3.65178e+06	1.81967e+06	1.04489e+06	774331	712084	1.18616e+06	1.21665e+06	890949	788758	665255	566262	651744	583850	564611	867338	1.03767e+06	943369	1.00262e+06	6.38271e+07	4.20491e+06	384701	399457	295744	113225	65362.1	81490.7	108405	97472.7	58521.6	48769.1	82065.6	64585.8	84509.6
13100	11401	13407	12997.5	14716.7	15596.9	17296	23867.7	27204.3	73055.3	57413.2	58706.4	95336.5	1.89754e+07	1.9741e+06	1.82635e+06	660334	247140	133693	364388	390598	756657	923701	1.12187e+06	885692	666291	715332	669717	849870	1.07079e+06	1.29014e+06	808207	1.43786e+06	1.41256e+07	5.30197e+07	4.6524e+06	203576	176477	169330	98201	96520.6	92602.7	96088.4	98409.9	126138	138620	137320	172041	191217	350384
12076.5	12977.5	10950.8	11871.7	14532.8	15863.3	20325.6	19506.4	29558.6	38301.8	44445.9	48644.9	222832	6.86297e+06	5.54855e+06	1.06539e+06	387575	1.22828e+06	741994	310718	762529	1.11281e+06	902573	1.01663e+06	915394	797803	889555	906569	884905	798235	839966	1.81753e+06	1.33803e+07	7.40137e+06	287101	187202	209288	314242	217445	181154	171870	171830	183070	137367	179326	164134	149941	205412	205954	329284
18810.9	13202.4	21226	17295.9	24808.6	30336.3	36889.9	57721.5	79749.3	135116	221771	519003	1.02338e+06	3.75542e+06	1.46463e+07	3.36104e+06	1.36356e+06	2.29052e+06	1.05049e+06	670338	913309	1.08316e+06	913874	896694	1.00442e+06	792645	928928	688577	667871	561844	4.41503e+06	2.21147e+07	1.70015e+06	347803	433771	465865	437405	564631	611504	443566	307812	202145	122467	119902	106917	98426.9	83151.6	110351	156441	213244
18688	20734.6	20857.7	30071.3	31974.8	43281.1	54095.1	81004.1	137787	230826	421064	647175	899318	1.82895e+06	2.69537e+06	2.85729e+06	2.21268e+06	1.47273e+06	801311	8.59893e+06	969533	698420	659609	489598	853878	769395	655321	626948	372241	495540	1.55738e+06	462421	358133	482156	477669	376111	268107	304781	451843	408200	212018	80264.1	59051.5	65444.1	63907.3	71654.1	132798	174837	129258	169678
14225.7	10377.9	10193.6	11298.8	16108.6	18544.2	22270.3	28002.5	47109.5	88402.5	319078	1.35622e+06	4.12244e+06	2.87872e+06	2.62582e+06	2.73545e+06	2.62855e+06	2.17662e+06	1.24435e+06	709631	751999	494952	398659	640152	158043	216537	545270	670112	3.57036e+06	1.31103e+06	241185	203593	239306	182273	174675	67907.2	199228	391732	797376	652103	170194	57556.7	66693.4	95370.9	111779	99022.1	176733	245883	192013	197749
15211.5	11790.1	11114.3	14266.7	19325.1	16702.1	19731.7	28719.1	27531.6	44610.8	81246.3	95823.2	170178	338879	805694	1.24755e+06	1.57156e+06	1.63389e+06	4.71055e+06	2.1768e+06	870620	321438	247788	297843	426018	564871	1.57241e+06	4.17328e+06	1.6137e+06	672107	299101	299718	185065	207499	118866	155237	320959	768524	2.08045e+06	1.11828e+06	337952	109411	88216	111696	133421	206107	294450	425013	6.18111e+06	5.05337e+07
11994.7	9334.08	8965.79	8781.46	11114.6	11298.7	10398.2	16908.3	15330.8	21533.1	41296	51002.3	404199	339982	414110	3.23806e+06	1.95135e+06	1.52894e+06	976180	923999	3.05201e+06	1.28468e+06	1.33315e+06	1.31915e+06	2.34188e+06	4.66264e+06	1.82267e+06	342774	171134	130575	86904.9	107896	194048	162372	515467	4.56361e+06	952633	1.30447e+06	3.88507e+06	3.45515e+06	5.83151e+06	905555	209730	183698	256037	388304	2.44445e+07	1.24144e+07	7.71182e+06	1.45174e+06
207
1039.12	1223.21	1591.62	1325.64	1878.26	1755.4	2041.92	1325.52	2021.49	2185.15	2348.87	1939.6	2615.02	2267.1	2185.21	4498.12	3688.45	3925.01	3965.93	8940.83	44967.3	25996.4	8674.31	6156.21	15922.1	151851	256816	177970	421681	234629	217296	277891	292033	220782	116198	67344	84798.5	59926	137469	106623	154460	110574	96438.8	79398.3	65087.9	41584.7	18870.3	6586.03	4907.5	10127.8
936.685	998.706	609.249	1325.52	1407.41	1080.04	1386.99	1243.63	1407.47	629.738	1141.88	1120.83	2963.01	3822.7	6667.98	9411.19	4379.83	4170.68	9493.14	8674.12	6708.89	8776.56	15123.6	24706.3	29928.7	76569	215356	187902	185363	329487	158910	190079	168408	300091	217847	144134	150180	123746	109032	89015.9	140319	177410	116760	56767.5	100892	98080.9	56400.5	18379.1	5910.61	5173.54
4764.15	2348.93	3065.39	2226.19	2246.61	2717.34	3986.41	4416.29	6156.15	3536.18	4948.48	10762.4	5194.09	8203.21	8694.61	15696.5	14170	10250.5	10721.3	8244.06	5316.83	4313.85	6319.93	10332.6	29090.2	1.67346e+06	492476	215384	422528	221930	224289	248737	287973	284226	251053	232124	228196	202629	205735	210609	213693	227416	117587	52218.4	98102.4	131527	90905.5	29705.6	9001.56	8510.34
4559.64	5071.28	7466.26	7670.96	7671.08	6340.42	7752.85	12072.9	5337.26	5685.36	6340.36	5009.82	3945.38	6831.7	6463.35	5767.25	3306.4	5746.64	9390.52	18440	24358.1	19464.2	17457.3	14856.9	15020.8	66387.5	1.21658e+06	3.23851e+07	2.07706e+07	346793	443193	175013	216020	229736	236617	412315	502224	372232	309339	367124	341319	263302	73986	43018.4	75421.5	108441	99664.1	33207	21511.5	16679.1
1632.59	1530.22	3004.05	2901.61	2410.33	2123.81	2553.68	2533.26	6588.98	2144.17	3536.18	4293.36	4293.55	5787.74	6586.15	8019.19	6508.76	12605.3	14611.3	21450.4	32817	51340.9	82639.5	138840	173059	154364	64886.4	71999	4.93834e+07	7.3965e+07	3.73896e+07	1.26685e+06	766722	356407	396919	452001	405321	290849	196277	173259	191652	172071	97713.7	59370.3	53795.6	69782.6	63018.7	38183.2	36380.6	25156.8
179825	7466.39	8592.11	12463.5	25505.3	24856.2	9452.1	12563.8	16619.5	16761.4	32776	22126.1	928950	32243.3	41176.2	36626.7	38199.9	85105.5	79419.9	125494	214307	262705	454963	706149	1.17093e+06	1.87455e+06	3.58884e+06	3.9411e+06	1.23626e+06	260047	302841	658484	3.56367e+06	1.15653e+06	690835	633529	485877	411789	293578	195662	208572	213836	164242	105078	64145.3	43817.2	42997.6	48242.9	43571.4	33799.7
9208.83	5132.75	7856.82	4600.43	6033.29	6094.69	10006.8	9207.85	5542.07	6729.56	7589.38	8326.32	6012.8	8571.68	6790.72	9554.48	9456.59	16598.3	14140.4	15532.5	14242.6	17274.2	12543.2	12461.5	15451	46567.8	49270.6	163142	230482	304581	439375	444071	646961	985002	1.0666e+06	705584	556136	495742	446356	323715	242289	234862	185353	137152	112400	84936.8	57484.4	70929.6	58018.3	37036.3
2144.3	1919.18	2574.17	2062.34	2921.97	2226.19	2001.01	1612.17	2164.78	2451.49	3106.3	2328.5	1980.64	2205.7	2041.92	3290.44	2433.07	3106.3	128562	20877.2	47205.9	36525.2	52302.1	33945.7	7036.57	8735.89	68354.2	162478	201502	376859	3.16502e+06	506979	771839	5.01072e+06	1.35302e+06	540090	429703	429076	397207	350517	344845	317776	218320	99579.9	100890	84831.6	45477.3	51686.7	78783.1	63715.9
2369.42	2287.53	1898.75	1878.14	2082.89	2185.21	2205.7	2614.96	2246.55	2574.17	3106.24	2430.76	2205.64	2410.27	4969.03	5951.46	8656.06	20078.7	29296.4	51276.6	133075	169767	153710	112003	45128.8	101890	218941	437093	513964	574264	740880	630921	1.00563e+06	476665	307385	272240	336748	449231	475596	394663	321633	299426	254875	121755	47873.7	62095.8	52115.8	39903.9	56111.7	66932.7
2062.41	1427.9	1796.31	2369.48	2164.72	1632.53	1673.57	2082.83	1591.62	2594.47	2308.07	2553.68	2553.68	4579.95	19792.3	44475.3	15990.4	4334.28	10066.3	28395.6	13137.3	14898	30850.6	173697	305808	233731	326282	376133	424435	540259	722919	521437	582414	463809	270212	135182	112033	183639	229390	242705	152479	111559	151877	139351	82171.8	35745.5	44513.4	42157.6	35479.4	43940.4
1919.18	1509.73	1550.77	1223.21	1714.55	2185.27	1632.59	1755.52	2001.01	2492.22	2041.92	2799.29	4313.91	12052.2	22618.2	18256.9	6326.86	2553.62	3351.72	4948.3	5808.23	23130.9	58516.3	106639	179158	283640	457039	543494	643567	641377	571304	611833	513795	763870	953330	525172	249919	296907	318245	166623	135043	78680.1	72139.5	99967.8	107558	73310.6	32263.5	43530.4	57156.8	82883.5
2185.21	1448.27	1407.47	1305.1	1735.03	1407.47	1346.01	2001.01	1734.91	1980.64	2042.04	3392.82	2614.96	2226.12	7691.63	1980.58	2414.92	2553.62	2860.63	3986.41	7363.89	11990.9	64438.6	228134	324491	370153	469153	523510	695020	937548	670921	1.07741e+06	864162	542898	527384	534658	422054	344418	265902	202557	358281	107845	105137	129558	167609	204014	216572	215401	243336	293789
1591.68	1264.18	1550.77	1939.48	1305.1	1325.4	1878.2	1591.74	1427.9	1653.02	1939.54	2001.01	11520.8	9841.37	4272.87	2082.89	2724.13	3229.23	3085.93	5050.73	7568.7	8694.61	43245.1	128912	258600	372256	935679	713456	532657	1.15864e+06	910224	841379	606334	529655	495920	514629	401434	349180	281528	223319	181254	171575	143744	132800	137501	170651	205308	274217	355551	371359
2062.41	1120.95	1039.06	1960.03	2041.98	1611.98	1878.26	1612.11	1612.04	1878.2	1612.17	1407.41	1898.63	2062.34	2164.72	2533.07	2305.81	3270.08	4006.9	4375.38	7077.24	8448.94	205777	114019	217912	340871	472998	492850	669844	545693	950675	538773	795420	537323	554257	417396	365309	321587	252231	183784	157054	187117	232062	238335	266456	310886	303101	240882	133999	80956.1
2226.06	2553.68	1919.12	1386.99	1448.39	1264.18	1284.67	1571.13	1161.74	1530.28	1714.42	1612.17	2001.07	1960.15	2185.15	1980.7	2069.23	2901.55	13179.3	57076.8	9984.48	8326.2	85722.9	119089	138883	260080	499501	556461	1.12934e+06	1.27449e+06	873742	1.20326e+06	785590	670448	384443	221098	219588	202655	188982	249978	265573	344690	400942	306110	214829	134692	93896.1	113693	134814	160008
1714.48	1714.48	1530.22	1612.17	1448.45	1796.43	1919.05	1694	1571.13	1673.51	1939.66	1714.55	2226.06	1694	1960.09	2574.11	3270.09	2594.6	3188.19	4068.18	4887.14	4539.09	10271	15123.2	41707.4	94784.1	188465	343292	492572	669430	966453	854148	1.06218e+06	1.21043e+06	1.17637e+06	2.66015e+06	2.26957e+06	1.2207e+06	742304	609250	497583	416908	1.41303e+06	2.71938e+06	1.78258e+06	3.08329e+06	1.51783e+06	300963	710270	599853
2082.89	1694	1755.27	1837.47	2021.49	2185.21	2512.77	2287.53	2062.47	2963.01	2840.14	2655.94	3720.32	3433.61	3474.71	7916.93	6090.33	6790.84	5357.81	5091.65	4866.59	11806.7	9615.88	8633.15	12236.5	18379.1	38005.4	43509.6	293247	276368	163214	290542	439718	382069	711854	4.57856e+06	1.95007e+06	355079	171926	184518	232875	181684	178157	153233	216588	298310	469940	542793	780100	2.67998e+06
1816.8	1080.04	1530.22	2287.71	1632.59	1755.4	2226.06	1898.69	1653.02	1919.12	2103.44	2123.87	3147.34	2635.57	3577.09	3249.59	3324.56	3024.47	6504.32	13649	8039.49	43305.6	1.19452e+06	235103	2.19105e+06	6.8488e+06	4.88832e+07	1.03456e+07	5.74766e+06	4.65458e+06	6.0548e+06	4.82098e+06	1.77793e+06	1.44368e+06	2.05029e+06	1.85174e+06	9.80359e+06	5.32778e+06	172627	98350.9	212763	166417	146504	109573	152251	169112	155674	178236	179263	218393
5521.71	7691.51	7220.6	5480.73	8223.64	10475.7	10352.8	10680.4	8919.79	11396.8	16003.5	15635.2	20119.4	20549.4	33964.9	34639.7	57199.9	165342	273813	9.61555e+06	2.26713e+06	2.8419e+06	5.30233e+06	1.1277e+06	1.17134e+06	661710	641480	771802	868729	560759	429824	419854	512896	709670	1.09559e+06	622429	8.3006e+06	2.55491e+06	179041	132965	116300	136353	93471.8	61975.7	136152	165309	89017	97385.1	98943.4	94246.5
6238.04	5009.88	4784.64	6238.16	6811.27	8132.34	11581.4	13833.5	26858.1	20406.2	15164.4	21184	29396.8	43716.7	72962.7	195781	665199	1.03861e+06	1.39734e+06	169842	83173.8	69537.5	232413	681539	244366	289217	303056	210076	273032	212666	262778	366011	503419	514157	260330	328623	7.56654e+06	778629	172767	134957	112177	60338.4	51074.4	28638.5	36443	54726.1	47935.4	48672.8	70316.9	74473.2
4191.11	4191.23	3085.75	3822.64	4682.38	4580.01	6422.86	5235.19	4129.71	11627	8059.86	9861.55	13505.5	30629	160473	1.11828e+06	1.87508e+06	1.4804e+06	673629	432252	331987	281670	492317	490349	355116	328269	262931	233174	268065	242209	232659	353385	425904	363118	401698	2.5407e+07	1.85728e+06	145070	161722	122891	48408.4	26979.4	31362.2	47102.2	40766.9	22740.5	20406	36548.7	24808.9	32776.2
5521.65	4006.84	4825.68	5112.2	6586.09	5705.73	7138.7	10087.5	12420.6	28495.9	21593.9	27227.5	37733.1	5.98496e+06	868788	749057	280452	102346	60394.9	150869	168718	304071	375978	461848	360617	275905	294117	277290	346008	423973	531092	357875	576942	5.63236e+06	2.1208e+07	1.89114e+06	88666.9	69417.6	66896	125842	37569	40108.9	38859.4	40109.5	50599.2	54287.5	55907.5	67057.6	83481.8	134851
5296.47	4293.36	4272.81	4989.33	6115.24	5357.81	9513.5	9636.25	12523.4	14816	16351.6	20324.1	87835.2	2.52931e+06	2.4382e+06	425553	160937	362581	309824	117792	313055	417575	378368	408674	379338	324366	363619	362030	337859	329677	337067	647028	5.71241e+06	3.46413e+06	114836	77449.3	85981.8	130431	88359.6	79215.8	73473.6	69374.1	91030.1	56788.8	74929.4	65826.2	61727.7	81506.7	85757.6	128107
7957.73	5153.17	8674.12	9186.01	9001.56	13403.4	15184.7	20508.6	34414.4	57321	91890	208448	403330	1.59302e+06	6.4244e+06	1.73949e+06	550629	690008	441803	275775	372231	437079	369298	302037	436521	317769	386336	296672	271201	233779	1.75829e+06	8.41896e+06	719185	151327	182220	192497	179013	218676	251305	181069	126725	84342	49575.1	48160.6	42382.9	40703.5	32550.3	41871.3	65315.7	90796.7
10598.7	10210.5	11009.5	13506.1	11519.8	18092	22126.1	33185.5	66446.1	93921.5	172122	269528	362052	739644	1.04669e+06	1.12724e+06	887415	602964	328242	3.75424e+06	409479	276806	284239	199983	334657	312633	264812	265166	153854	207453	711000	173374	150109	196154	195146	153912	106101	118721	184815	168467	87021.2	31956.5	25812.1	25893.9	26139.7	27000	56071.8	70725.6	51583	66996.4
7200.41	3720.32	5112.2	4989.33	6422.19	8019.07	9308.87	12011	19525.4	35848.6	125155	569087	1.61032e+06	1.24454e+06	1.01474e+06	1.10099e+06	1.06737e+06	879894	517023	298477	304889	199662	161657	254571	67574.1	93612	224814	239101	1.42409e+06	525603	102434	73410.6	96115	72529.1	73517.7	27697.3	83829.8	141019	308988	269222	71333.7	23518.6	26631.3	39658.4	47628.6	40743.9	69886.2	99189.1	79479.3	80628.7
11240.3	4498.18	5746.77	6708.89	7016.02	6688.53	8489.92	9554.42	12072.4	18768	34660.6	39474.1	70807.8	137240	275008	543820	646914	664222	1.76544e+06	900599	337488	124839	98984.2	123523	166871	228981	644717	1.67678e+06	701713	283021	126361	121967	75011.3	79051.2	48634.3	58573.2	132630	306942	837051	459736	139902	44618.1	35049.4	42874.6	49288	83274.5	137741	170317	1.94043e+06	2.15692e+07
4047.69	5399.15	4006.84	3699.89	4232.02	6279.14	4886.95	5603.41	5664.81	8223.7	15962.9	18603.9	159869	132289	174487	1.26555e+06	443345	598282	400218	369676	1.28501e+06	521956	531522	552373	945319	1.85274e+06	761500	146439	71978.3	54369.6	35151.7	46853.2	77966.9	66543.5	189453	2.12077e+06	371623	526468	1.58485e+06	1.30528e+06	2.26674e+06	387148	89438.1	80325.6	102986	177238	9.81324e+06	5.1465e+06	3.26901e+06	652514
206
1507.81	1344.19	1609.96	2059.93	1978.06	2080.27	2714.14	2427.78	2816.53	2877.81	2325.57	2448.37	3307.25	3368.41	2775.41	8072.16	4593.1	4738.35	6108.73	10506.5	55301.5	36630.2	11446.4	7458.21	19342.3	149716	305110	228803	515712	299052	278070	350584	368180	291266	156011	92288	144014	101436	179097	142305	237444	152336	132378	116919	84990.5	60906.8	36710	18543.9	30755.2	24088.1
1221.57	751.26	1160.11	915.488	1446.53	1589.67	1896.37	1426	1507.93	1569.08	1344.25	1344.25	3818.25	5086.23	8624.03	10853.2	5974.51	5331.41	10566.9	9094.47	6987.95	13594.6	18584.8	28630.4	35791.2	97307.6	224972	235270	250055	370989	196571	247249	216765	406898	293253	196955	214049	180633	161319	132708	187132	241119	168680	90379	132833	139044	90527.5	36958.3	30635	26890.2
5720.22	3082.18	3470.87	2775.54	4329.56	3163.98	5679.29	5842.72	8174.43	4636.14	5822.25	14207.6	6742.53	9073.82	9892.01	19587	16500.3	12980.2	12980.2	9298.77	6129.2	6067.61	7826.49	11957.7	34831.9	2.11759e+06	636742	260633	502673	286747	289832	310808	369495	379279	322474	301308	299873	270784	272028	277092	276716	296853	173676	79747	130270	170620	131215	56036.9	33414.6	29406.8
5740.51	6108.54	8501.35	10096.5	9810.08	8705.78	8869.39	12755.6	7151.51	13704	8030.92	7806.02	4840.75	8685.43	8399.02	6415.24	4138.66	6967.49	11221.5	23494.3	30982.6	24721.8	20098.3	19116.4	17439.3	79165.9	1.55491e+06	3.65039e+07	3.11837e+07	398017	236452	220674	283701	308247	312639	508508	645504	478831	394964	457740	419846	349478	122511	66782.6	106284	141240	135459	66252.7	48684.5	48029.8
1855.38	2121.2	2980.02	2775.41	2489.24	2366.57	2898.28	4882.11	2734.48	4472.71	5024.83	5167.85	8420.22	5474.62	8337.68	10772.3	9992.05	20631.8	18975.1	35583.2	41930.7	59537.1	94664.4	161227	235547	184835	80291.7	92474.1	6.31e+07	8.70412e+07	4.52957e+07	1.866e+06	644395	461344	552272	566687	533517	389583	268838	240171	258142	224228	142802	91999.6	78005.4	97878.8	100277	65717.8	65779.2	49606.3
9094.35	8685.56	19702.8	13900.7	17705.8	37140.7	14269.7	16171.1	73233.8	24150.9	24108.4	27811.1	37777.5	48580.6	54529.9	49589	53027.6	115530	98696.1	148799	221080	328438	586243	917075	1.31729e+06	2.25855e+06	4.14555e+06	5.00557e+06	1.62136e+06	364076	368698	855997	4.86862e+06	1.55877e+06	871928	817276	603816	518368	395566	264582	272209	271901	225582	138721	89129	69608.9	66291.4	74175.4	72414.6	58777.4
9238.23	5822.31	5454.21	5290.72	7294.72	5985.93	8849.54	6865.27	7581.07	5372.4	8542.29	7315.06	9196.74	8828.46	9871.6	10771.3	13373.7	14125.8	18892.4	17050.5	17009.7	19771.1	16355.1	16334.9	15434.6	54261.5	56384.2	205247	276686	369121	549653	517452	824220	1.1864e+06	1.32906e+06	882292	707227	632737	566800	404876	313686	299970	244912	174624	147680	117906	85707.6	96033.4	91773.3	68031.7
4043.27	2427.84	3675.48	3204.92	3818.32	3082.18	2448.31	4084.2	3184.45	2816.35	14207.4	3654.82	2959.56	3143.7	2816.41	3552.37	4975.1	4063.74	170429	28098.8	62412.8	50263.1	78291.7	45312.3	8235.34	11917	82767.1	198633	253419	437973	3.62096e+06	612692	812663	6.34363e+06	1.72189e+06	781479	541008	538851	501687	435929	431431	402435	288561	143832	140520	119748	74648.7	76532.3	108617	96833.8
3204.98	3225.45	2243.95	2612.11	2611.99	2714.07	2918.5	2366.57	2795.94	2775.54	2939.15	3102.58	4104.67	4084.14	4063.55	6987.95	10810.2	26134.4	36490.8	64348.2	161400	216815	198145	146073	60314.6	125500	276178	531685	615182	745936	904445	785248	1.24445e+06	557664	396883	360262	449435	577188	595436	506194	417876	402368	333607	174938	78374.3	94517.4	82696.8	65145.1	80136.2	97549.9
2509.65	3614.01	2018.99	2080.21	2080.27	2611.92	2039.46	1977.93	1569.27	2693.79	2387.09	2673.32	3204.92	5188.57	22063.8	57347.2	21374.5	5658.7	11896.4	30185.5	18789.4	18114.6	41850	227818	390754	291163	396308	450776	522816	631791	909830	661341	718899	568707	356594	195075	172121	259652	308350	322130	216913	164771	226198	204953	136838	72742.5	76182.4	74974.9	62994.4	75487.2
2448.37	2284.76	1753.16	2121.27	2182.54	2100.74	2223.54	1814.51	2755.13	2346.04	2427.9	4493.3	4820.22	16253.3	28957.3	22267.9	7501.47	3859.13	4902.09	6292.75	8603.5	27566.6	73837.6	133880	221739	349208	551693	667070	733820	694338	695525	738397	628193	922604	1.27783e+06	669250	324084	390967	428954	237692	195080	132071	131948	168938	170640	123913	71513.5	77534.7	91055.1	117042
1794.22	1691.95	1671.36	1978	2039.46	1835.03	2387.15	2080.21	2325.63	2162.14	1937.12	4370.38	3552.37	3920.53	9789.8	3123.05	2393.88	3572.83	4022.8	4718.07	8705.9	13635.1	78876.8	255721	366744	443296	582914	640114	854408	1.15917e+06	861311	1.23626e+06	1.06298e+06	680802	658635	688867	524558	440707	343635	260332	477172	166128	157999	189181	231317	269152	279926	280623	313209	377277
2427.9	1548.74	1589.55	1712.35	2243.95	2775.48	2141.67	1957.59	2039.4	2039.52	1794.04	2673.26	14762.3	13083.5	5351.94	3225.26	3720.66	3184.51	4124.95	5597.36	11344.1	9135.4	52554	163503	311886	455516	1.06023e+06	874053	645285	1.4466e+06	1.1809e+06	1.20407e+06	756527	651998	604648	633649	509408	454128	359666	295092	241633	226010	206106	194313	198995	241801	262279	358305	442622	480360
2264.35	1405.59	1139.7	1875.78	1896.31	1609.89	1978	1998.52	2448.37	2652.8	2489.3	2141.61	2468.72	2121.33	2550.58	2652.8	2902.68	4002.34	4534.11	5372.47	12981.4	10035.2	213107	136275	267276	406307	578727	615581	811589	684598	1.19624e+06	785675	975468	649720	662617	535172	464020	415026	328128	255655	222233	250133	311809	316092	352636	402103	408088	327590	206319	139413
7543.82	2632.33	2182.73	2039.46	2059.86	1466.87	1630.55	1650.95	1814.44	1630.48	2652.8	2039.46	2223.48	2141.61	2182.55	2182.48	2739.11	4104.49	15416.1	71210.1	10751.3	9339.77	104850	145101	173652	322291	618158	690947	1.4937e+06	1.52083e+06	1.02394e+06	1.55318e+06	973668	844053	481972	286454	270587	264324	255487	320684	380050	455357	514027	416869	297944	194381	144480	168323	194561	229033
2284.88	2284.76	1589.49	2305.22	2141.61	2080.33	1201.11	1794.04	2612.05	2100.86	1998.52	2755.19	2018.99	2959.56	2121.27	3020.9	2357.44	3429.87	4493.12	5045.24	5188.38	7499.32	10239.7	20712.5	47539.4	114305	228645	406933	629253	817351	1.1578e+06	1.03074e+06	1.37304e+06	1.44766e+06	1.38019e+06	3.3101e+06	2.79752e+06	1.44085e+06	889218	807812	636687	499597	1.66029e+06	3.23171e+06	2.16267e+06	3.44493e+06	2.00099e+06	381881	868528	738096
3880.21	1753.16	2305.1	3552.61	2448.37	2652.86	3102.77	3041.36	3368.29	3920.65	4145.48	3368.41	4309.1	4574.92	4452.24	8460.66	7083.36	9094.35	7090.29	7438.11	7212.85	13717.1	10873.8	10607.8	16744.3	21980.4	47480	57241.7	374104	353200	203099	390608	571004	502487	842048	5.93574e+06	2.45548e+06	490713	232958	230808	302579	231567	223735	203886	301794	374146	567233	650301	953223	3.17196e+06
2755.01	2182.61	2468.78	2877.81	7687.34	2387.03	2816.41	2591.46	2571.05	2223.36	2918.75	2734.54	3082.18	3102.7	4268.22	5392.93	3266.16	5352	8174.25	17439.3	11610.4	51204.2	1.42366e+06	325411	3.00481e+06	8.06156e+06	6.0279e+07	1.24718e+07	6.34778e+06	5.17163e+06	6.58792e+06	6.2966e+06	2.14535e+06	1.80667e+06	2.47182e+06	1.9257e+06	1.15624e+07	1.86646e+07	228765	135550	219956	216761	187986	140938	190768	205186	203131	234453	220187	285389
8910.51	8501.29	9135.28	9707.99	25828.9	10832.7	12019.1	13123.4	11200.9	12305.3	24217.3	20814.9	28343.4	30511.6	37326.1	42097.8	62782.9	202321	357576	1.18454e+07	3.19336e+06	3.50361e+06	8.361e+06	1.43115e+06	1.48641e+06	824320	780302	938999	1.18172e+06	730609	573265	522152	649066	865789	1.58393e+06	816629	1.07302e+07	3.03991e+06	211260	165963	141671	175427	121907	78298.4	172643	204993	113954	116387	128240	120367
14887.9	7110.76	7642.47	8133.31	8399.02	100452	16622.1	15455.6	60962.4	23290.2	28841.2	22532.9	35914.9	58432.6	87840.9	230152	759033	1.23944e+06	1.69585e+06	220628	112782	91591.2	258461	823382	318008	386045	406860	273779	337820	303858	333609	479599	636748	643129	329768	398289	1.05505e+07	749855	217117	168366	137343	78426.2	67198.8	33621.9	43180.2	61098	57569.3	59862.6	86408.7	103518
5965.64	5126.92	4390.84	3961.46	4922.44	6129.07	6517.76	6640.38	6129.01	7744.5	11610	12653.3	19771.1	37553.9	202186	1.3586e+06	2.18757e+06	1.87888e+06	881949	569223	422695	366995	660616	628192	474845	424111	367994	316031	351080	322437	307647	443232	532158	467187	498148	3.06256e+07	2.74166e+06	205929	203918	153110	62465.3	33049.1	34808.6	51818.8	51267.4	28691.3	24946.9	45333.3	34134.2	39966.5
7028.83	12185.6	6292.75	7560.48	7744.69	7090.1	9442.04	8705.84	14964.1	35978.1	28875.3	26215.4	47232.2	8.79023e+06	996660	937583	382831	179972	100265	184539	265125	430798	490782	570932	476310	366566	390167	351554	431604	550876	666408	446771	699312	6.74537e+06	2.71279e+07	2.71707e+06	107010	86268.9	82375.8	52023.2	45880.7	50323.7	47988.7	46699.6	61418	66742.3	71864.1	79913	100198	177842
6006.33	4902.09	5392.99	9115.24	7151.57	7540.2	10157.9	10300.9	13675.6	18441.7	23555.9	25376.2	109742	3.51921e+06	3.34986e+06	585567	194716	415931	449952	143527	392960	562717	504373	513260	502440	430911	472000	474868	464944	433987	440413	821414	6.33483e+06	4.49442e+06	157017	96976.9	104990	167382	102019	100493	80997.2	83148.8	95611.3	66865.5	95977.9	79255.1	73276.3	96941.3	102040	164894
12553.4	7315.24	9728.27	9155.75	13164.4	18032.9	18093.9	24865	40928.2	74833.4	109277	250307	474987	1.8708e+06	8.09339e+06	2.13779e+06	811202	750135	636187	407140	497285	569171	485609	376151	517784	403431	492766	376002	357380	284661	2.2136e+06	1.04804e+07	958075	173621	219602	236886	223011	277068	304753	223938	154903	104237	64141.4	63282.1	55664.9	50753.7	43465.4	49688	77843.2	97621.8
12735.8	8644.5	10157.9	19590.3	14187	25398.2	27565.6	40375.3	75104.9	118050	206961	342329	468966	917400	1.26679e+06	1.39095e+06	1.12977e+06	846743	424343	4.80683e+06	537146	332850	395781	272206	425918	393811	357573	338627	215086	246660	865844	224092	186141	237562	243482	192248	133918	150489	231223	200425	112720	41910.6	31105	42844.6	31780.3	32742	61604.6	86201.1	64776.4	82351.9
10506.6	5352	5392.87	5761.03	8848.92	11835	11364.4	16458.1	21653.3	44060	139054	692146	1.88172e+06	1.5194e+06	1.27466e+06	1.38596e+06	1.32732e+06	1.06181e+06	632985	389774	392032	255153	216766	325342	94630.6	120223	306626	300540	1.76875e+06	731985	122622	86138.8	121558	93492.6	94753.1	38455.3	97664.2	167760	378322	327988	86933.9	36345.7	34215.1	47088.2	61358.5	46678.6	87327.9	121265	100522	108784
6108.79	5965.58	6353.97	6865.21	7887.71	10321.4	10035	14044.1	13982.5	28059.3	42033.3	47231.5	85279.8	155268	352872	630721	746387	817278	1.90754e+06	1.26915e+06	483097	159445	145493	175638	234810	307962	776673	2.10675e+06	924339	361080	158815	164219	94725.8	100915	66871.1	68816.2	163073	364301	1.13291e+06	578184	181475	52432.9	46415.2	50199.5	62217.5	101897	151218	213761	1.34779e+06	2.70671e+07
6374.43	4329.5	4288.69	4656.61	7561.52	10773.6	6476.77	6353.97	8153.72	10648.7	20733.1	25376.6	271272	172019	199557	1.47606e+06	591571	708990	516374	451157	1.50446e+06	652872	686539	684409	1.18693e+06	2.17437e+06	991078	188821	83129.5	67992	45430.9	60136	99123.2	85175.5	200664	2.46291e+06	484828	639649	1.74723e+06	1.60959e+06	2.79198e+06	471514	106129	86960.7	132343	206181	1.07119e+07	6.02923e+06	4.45799e+06	627303
[truncated: 17 more columns]

## Sheet: ARB
ARB		WC1 Correction factor: 0.87701
238
5456.67	3588.43	1923.33	1029.8	1679.6	2613.66	1578.1	1618.69	1395.41	1801.37	7162.68	10818.2	7162.68	4624	4197.59	55797.4	92499.6	62671.7	59447.4	46844	20284.2	10899.4	9965.1	10919.9	13174.3	29650.3	43936.3	47941.2	68456	89284.7	142977	380062	324015	310352	260138	295258	321081	258178	278723	185313	143643	127654	202197	241265	210330	335485	301045	237317	132053	75838.1
17419.9	11996.1	5700.4	1395.47	1171.95	1232.99	665.094	441.818	1151.75	1517.3	1760.91	2999.48	9619.93	12057.5	12869.8	51341.2	127395	173402	162306	157679	132481	100315	94439.3	192345	199453	141407	84952.9	86233.5	90953.3	125911	563616	234683	180878	203214	473576	601759	513255	316795	195645	169665	136578	122238	166653	149205	100096	79479.4	132136	115584	193743	172050
10148.3	3669.74	2999.42	1415.74	542.594	725.341	929.081	481.679	786.257	868.165	1476.59	1781.23	2816.8	4035.11	8117	13316.7	30219.2	54237	73926.4	76225.6	124113	213569	474391	674243	723250	704405	485823	361490	260583	278069	228137	107501	114950	145700	103389	247072	340973	206811	135680	98503.8	78606.1	107278	265436	233342	152648	205251	213048	278097	172830	142548
7873.28	3365.04	1801.43	1456.33	887.762	745.606	745.606	1212.67	826.846	908.026	1192.28	2288.88	3222.82	11001.2	24977.7	47168.3	32890.3	13293.4	14779	26764.9	34791.2	75981.6	110413	190217	229226	268391	261583	265137	268009	269439	130066	93538	122078	127939	102736	170184	307347	311634	167789	167998	95878.3	203815	255695	254074	313472	329468	393304	354687	247236	81962.1
12057.3	5862.82	2654.31	2349.61	1679.6	1821.76	1354.76	1882.74	4969.23	6959.48	9944.96	8035.82	9376.39	19289	56602.3	68497.9	20095.6	12573.7	15469.5	20730.9	24611.1	55690.2	160343	329511	334177	270543	297638	221659	179979	138896	102981	83670.2	98096.9	109921	103652	125883	223564	219774	128062	94474.6	154058	273378	204637	280786	298609	358671	433097	335773	217032	184913
21076.8	18557.3	13804	6451.83	3263.41	3101.05	3040.07	8564.04	9599.6	5334.78	6065.95	13093.2	22234.2	46195.6	136144	215062	119809	25668.4	33210.2	24652.1	63475.2	143283	459793	364995	329328	287472	237774	144478	113220	68659.4	80150.6	91360.2	95125.1	113775	195436	208003	170358	149104	117535	133949	223733	244024	304701	318359	320793	335502	319875	283961	234960	259095
27841.5	27130.5	16282.4	4745.77	4542.76	4542.7	3872.62	8584.18	7223.41	8665.61	10554.4	8360.72	12565.1	26419.9	194728	683564	821863	280883	126803	104203	148562	270929	397527	474357	528420	409647	289206	243391	116421	65487	62945.2	65588.5	74577.9	107032	148737	188304	213206	143358	148373	217062	320463	395228	323309	259286	240703	286876	299822	254163	237719	179537
948.739	1029.86	745.484	887.762	1192.28	1273.52	2187.19	3588.43	4969.17	8502.94	15469.7	15327.5	23107.9	29771.9	198401	677279	689696	807697	901454	756531	382081	269427	259688	178579	158210	244991	307932	223041	133562	121535	60587.4	62640.2	94352.6	147048	147249	142318	155726	180714	237981	250760	246003	302652	356125	298675	293388	241248	273196	420113	228690	64088.2
2167.11	644.768	826.908	1476.65	1781.17	1415.68	2471.63	6329.88	6776.68	9559.14	23819.1	56909.2	57740.1	48489.9	42229.2	48977.9	173158	226038	239104	297847	464646	298639	121074	56866.5	117138	274489	346038	328690	285445	156417	111875	119469	185224	227104	235227	250046	288699	351632	292676	213411	262808	291129	293785	235268	221058	225816	334423	296672	348850	235701
1720.26	1293.78	2268.56	4766.22	3832.1	3811.71	7386.01	12321.3	16099.4	25118.9	23879.8	60669.7	56584.6	35014.4	39952.8	37148.2	43434.1	49148.9	71672	228761	188305	96998.4	104303	112079	137350	228922	265559	283382	409738	393160	319164	215840	224284	274902	275697	290355	302738	269881	262665	195726	285989	323844	200581	226671	145286	170125	314339	335829	296376	238337
4441.25	4075.82	7223.47	8828.03	8827.91	6898.51	10269.9	16343.2	35625.4	151642	193116	59388.1	67603	92398.5	58838.2	40359.3	45478.2	44293.5	40887.8	40867.4	68029.4	94494.4	199323	254455	326790	373023	508596	481478	372095	381114	373044	258045	178959	189705	168767	182610	167667	166282	187117	230339	303007	218432	251110	224971	87588.5	101570	234130	270758	328222	174332
81517.2	40115.9	18821.2	19186.9	19755.6	10919.8	10777.7	28837.8	95903.2	193691	315815	182243	232600	235452	136151	95064.5	63439	45896.5	39851.3	45217.1	62151.6	84566.1	184776	480126	886710	955223	734017	985136	491841	254907	271836	267575	269306	239940	271151	276374	249493	263546	305783	295480	316769	294401	384985	234150	88677.9	98022.2	206265	239860	126459	74822
225369	149470	83977.6	41355.7	44018	103803	211779	152030	118919	146558	247929	238245	205515	129126	81839.3	91096.5	104475	168361	149673	141992	126860	126309	132297	156887	163019	209525	248339	209397	181569	266945	349392	419963	346717	405947	420162	419463	402416	327893	288275	241924	262609	190524	206639	149652	120672	141411	281971	494958	428750	138172
125986	183814	223039	190329	91425.8	100009	126682	153483	172135	199087	210207	235837	228898	166791	144314	157619	177113	332885	345941	453901	498237	465612	391050	302862	295462	299225	259785	241430	263625	290821	316487	420873	417018	363262	275783	227940	202493	238151	368124	377859	304129	251561	181289	123260	94738.2	119677	263102	574581	447278	383121
65529	112407	183309	163433	175854	211343	210003	200168	214264	183508	169970	250159	275784	189666	178185	188705	203327	214427	282121	351040	323087	329001	264026	148153	100172	104873	86701.3	75370.6	86783	109332	166932	211411	246496	298710	290576	243392	212469	240944	374175	357976	286132	172561	102109	78787.6	127538	208728	284145	286550	314708	233639
146112	143299	234976	331885	315540	252089	201786	155766	160186	194725	218182	329832	179013	151406	189541	197496	201723	137657	143030	113854	84666.7	121506	153890	120020	97505.8	124874	160004	148735	170399	207941	177066	128651	157421	244187	240578	190194	211838	326869	349758	226918	202535	178776	173293	174597	244269	237510	211142	190664	160493	158680
240768	205818	310711	329916	188667	178899	153665	183550	274070	278951	264709	365428	167810	180797	302845	228404	152349	120132	91240.8	73275.9	78604.6	75614.8	65812.7	69554	79682.9	112201	111122	106278	105809	111733	127043	120324	145641	156723	118880	86925	94435.3	359514	516843	323390	309175	315917	226733	281099	352611	440938	295022	164324	163499	163519
383107	297690	339739	325871	330308	357137	303229	279544	296035	257604	314481	172701	148842	179968	331845	346528	189906	111037	84504.2	95736.1	80702.5	55360.8	61928	76143.3	93153	121423	105423	81107	68231.5	74455.8	78055.1	89672.5	90424.6	85236.2	80598	86497.8	98767	178809	292767	182753	130180	178737	171702	162367	178103	176249	160838	252783	312358	72655.2
307996	328994	339941	312965	250823	219534	152059	154323	243882	214533	264441	134417	139717	169410	352970	441205	224139	101732	95735.4	77610	56560.4	77100.6	104711	111000	134031	140729	78445.8	45135.9	46294.5	48977.7	55686.1	57638	58431.1	77933.5	86965.7	110491	130301	175989	246478	167345	171827	228590	249763	135605	102512	106239	143522	300852	219968	131995
288584	133094	222859	284456	252514	235534	166343	222966	253505	256450	270147	230960	221774	234397	358883	448276	206697	107034	87597	66747.5	99562.8	153164	199677	144177	103917	84525.2	66198.4	55096.6	44505.8	31336.5	38326.8	42757.8	48835.4	54730.9	79174.6	119064	167087	362144	342330	229469	227610	235141	174624	134944	126412	165200	179474	383576	241275	180309
195440	135190	211879	272983	283593	253027	291412	306360	339286	403910	317872	337695	331229	305301	282218	337051	253616	104010	105036	129854	159800	196230	191215	163304	151958	91790.1	79947.8	109148	70559.3	26724.3	25302.1	24936.2	26724.1	44567.2	63474.5	127583	306702	403196	389100	304725	231207	175555	144845	143357	114848	170309	220785	345217	416527	335645
91875.8	152985	236377	165209	221782	289572	203439	283928	316877	288020	288348	295329	221533	251501	357246	267137	147045	102637	133199	178837	224784	385383	561829	588874	397148	232434	138981	87679.4	53735.2	36152.5	23473.4	16444.5	23291	79130.9	329721	473446	435559	439907	394263	311532	259066	210735	223169	175783	230162	219651	378501	432998	449026	491224
361890	215292	249810	156316	91936	55177.8	93739	155460	183880	248905	279652	217100	209203	263876	370552	345054	135438	81475.7	136100	322644	562223	755822	815878	834188	749999	608149	424840	240494	166527	104235	57516	40115.7	49182.2	163441	371022	451185	433857	466531	349221	332065	283673	415454	357459	292030	336649	398568	309405	367873	463787	344900
389333	326118	310376	239707	142280	219507	454526	458905	335218	361000	310817	253989	239084	261841	539949	363458	135423	152097	412526	925826	1.15956e+06	1.18998e+06	1.13534e+06	1.14503e+06	1.04837e+06	847713	554768	296994	171990	102702	80577.8	61399.7	120856	257101	398487	448845	443066	376939	314762	328384	302535	322922	365388	272225	240890	315278	297843	243461	320202	369989
471076	433921	411818	457054	332710	420484	749313	380530	228429	233366	265634	337030	230127	397824	393029	183014	169955	248017	810705	1.00594e+06	1.03076e+06	1.05269e+06	1.10359e+06	1.07541e+06	963864	736198	503301	363722	227991	121087	91544.1	111938	230920	329571	336402	368495	387705	289944	237326	241306	415543	403249	291544	163371	144849	281253	380882	359637	437457	377613
324366	239489	176704	134437	82024.3	241368	285085	177869	200191	250170	294602	228673	432003	409506	191259	116130	123111	270263	680428	891351	948594	964926	926306	892262	764710	611144	422564	240138	183550	89353.6	108502	145721	247225	355466	411263	353046	400336	441745	391178	233869	187094	181447	197824	98629.5	91117.6	166636	263266	383938	387349	330592
331697	209245	210778	306208	302300	308675	245085	257132	240110	331316	182551	278331	294338	211344	96916.6	110371	179729	571477	1.20502e+06	1.39092e+06	1.29906e+06	1.18062e+06	1.06685e+06	956213	730866	472254	247797	164568	156140	84790	172257	153424	242395	420107	508716	397890	353183	156907	136512	231837	211167	112657	70814.6	87780.5	123909	260521	371444	520927	460770	257990
250354	234509	269205	376282	311223	268737	225798	288397	384350	191896	162029	187976	118661	68863.1	109864	147676	134701	323964	896200	1.19736e+06	1.24449e+06	1.11543e+06	818612	499816	238696	190501	184022	200633	90080	142982	217082	198618	333182	403415	370895	324296	216451	132827	146251	113058	130018	87678	51297.3	34059.4	181490	494203	623004	417896	200642	66117.9
235
20.195	40.392	20.195	20.195	60.812	40.616	0	0	20.195	20.195	20.195	40.392	40.616	20.195	40.392	508.284	604.747	418.442	671.525	304.61	142.146	142.044	203.019	60.812	223.275	223.439	365.585	223.439	426.847	671.525	977.463	2344.41	2201.53	2201.59	2181.23	2283.15	2303.51	2119.97	1936.37	1385.57	651.268	1018.3	1365.02	2283.27	1426.28	2629.86	2201.65	1936.18	1242.74	671.647
162.178	0	20.195	40.616	0	20.195	0	0	0	0	0	40.392	60.587	60.812	40.392	528.99	860.994	1257.31	1222.39	1099.92	1018.37	630.622	590.128	1344.72	1222.45	1018.24	549.185	590.251	488.21	814.569	4649.83	1711.92	1161.25	1589.4	3833.57	4180.47	3405.23	1956.72	1589.83	1365.21	977.525	855.186	1018.43	1120.35	1099.99	529.051	957.104	855.186	1100.11	1365.21
40.392	40.392	0	0	0	0	0	0	0	0	0	0	0	20.195	60.587	182.66	92.51	348.125	508.344	732.847	569.484	1283.53	3690.81	4221.25	5506.45	5792.21	4017.23	2303.51	1997.57	2446.39	1630.37	712.59	732.725	1059.14	610.385	1977.14	2221.95	1426.47	1100.05	773.626	488.149	875.769	2181.17	1671.08	1222.33	1405.92	1548.68	2140.39	1507.9	875.667
20.195	20.195	60.812	40.616	20.195	0	0	0	0	0	0	20.195	40.616	40.392	284.639	264.158	139.185	162.523	141.819	162.628	406.365	834.929	957.104	1365.21	1752.77	1732.28	1895.59	1711.99	2629.93	1997.57	977.463	610.447	997.945	1099.99	631.092	1508.03	2201.65	3262.41	1426.35	1242.74	896.027	1548.81	2528.01	1834.33	1610.01	3282.77	3160.37	2874.79	1773.12	528.765
162.628	40.392	20.195	0	0	0	0	0	0	20.195	0	40.392	40.392	121.623	284.353	365.974	138.741	209.011	183.212	121.562	81.007	487.925	855.472	2283.27	3282.83	2405.48	2446.39	1834.33	1406.05	997.884	1181.55	630.969	610.61	896.027	671.647	753.369	2017.99	1528.39	977.586	508.508	977.525	1936.43	1201.97	1854.81	2568.72	2772.93	3282.89	2487.11	1691.57	1202.09
81.171	101.366	101.53	60.587	20.195	20.195	40.392	20.195	80.782	0	0	80.782	40.392	325.071	936.745	1426.28	977.799	92.51	264.219	182.435	406.528	977.463	3629.67	2854.3	2752.39	1997.63	2058.83	1242.68	1079.57	488.149	630.908	549.349	733.072	732.827	1528.51	2038.47	1222.39	895.904	855.349	793.863	1283.53	1773.12	2140.2	2548.3	2364.77	2935.93	2630.05	1773.19	1814.03	2079.19
203.244	223.439	182.66	81.007	0	40.392	20.195	60.812	60.812	121.787	20.195	40.392	20.195	162.239	1446.83	5690.36	6200.27	2143.23	1018.24	997.945	1038.66	1936.37	3323.61	3221.63	3772.43	3058.45	2283.27	1650.85	875.545	590.026	692.006	447.267	488.21	774.015	1161.19	998.007	1344.85	855.125	1242.87	1793.55	2283.27	3037.91	2527.95	1834.45	1956.72	2120.03	2833.88	1936.43	1650.79	1120.35
0	0	0	0	20.195	40.392	0	0	0	20.195	182.987	81.007	60.587	223.378	1528.45	4996.49	4801.2	5524.18	6710.4	5322.91	2017.92	1956.85	1650.72	1324.37	1548.87	1813.97	2099.61	1609.94	794.149	875.729	549.185	243.574	753.084	732.786	1140.7	1140.77	1304.07	1548.81	1915.94	1773.12	1609.76	2242.3	2772.75	2181.17	2405.42	1752.83	1834.39	2670.83	1671.14	243.512
0	0	0	0	0	40.616	0	81.171	0	142.207	182.374	426.847	589.965	223.378	365.749	386.169	1583.83	1467.14	1956.91	2242.43	3037.78	2323.93	814.569	304.938	753.554	1813.9	3180.72	2548.3	1916.07	1079.5	1079.5	814.345	1385.5	1956.85	1324.24	1671.14	1915.94	2997.19	2446.32	1691.5	2201.71	2405.61	2568.79	1344.66	1916.01	1609.94	2691.06	2426.03	2242.3	2242.24
40.616	0	20.195	61.036	20.195	0	81.007	81.007	100.978	81.007	60.751	427.01	345.39	203.019	447.206	182.374	464.534	255.032	549.185	1834.39	895.966	773.79	875.607	875.484	1079.63	1936.43	1548.74	1977.27	3017.67	3221.63	3017.67	1446.7	1589.53	1773.12	1814.03	2629.99	2507.59	2160.75	2466.68	1507.96	2160.75	2303.57	1630.37	1732.41	1426.35	1345.01	1977.14	2568.72	2405.61	2303.57
20.195	60.975	60.975	40.392	20.195	121.848	80.946	60.812	121.787	1181.55	1610.01	263.933	631.194	610.385	284.578	202.957	208.497	278.44	365.912	223.378	467.728	365.626	1609.94	1916.01	2487.23	2487.17	4404.85	3160.43	2915.51	3262.28	3262.41	2038.35	1548.81	1487.61	1018.3	1405.86	1161.25	1120.28	1813.97	1508.03	2609.57	1589.59	1977.14	1712.05	610.774	589.904	1487.48	2058.7	2732.09	1100.05
528.826	447.88	101.428	141.594	202.957	121.623	60.812	142.269	692.006	1405.99	2160.68	1385.38	1365.21	1834.26	1018.37	732.725	651.166	558.399	365.974	468.015	610.325	569.545	1711.92	3609.31	6730.7	7302.1	6016.72	7200.18	3731.71	1773.19	2323.99	2099.55	2364.64	1732.22	1732.35	2160.81	1528.32	2058.7	2262.91	2344.35	2099.55	2364.77	2956.41	1467.12	386.169	814.284	1732.28	2079	1018.37	468.015
1487.55	1610.01	712.488	304.549	406.365	895.966	1589.59	1161.12	834.826	1099.86	1834.39	1895.59	1426.41	1038.66	753.369	793.863	837.586	1164.03	1365.14	1039.13	1201.97	875.545	936.745	1242.68	1283.59	1752.83	2344.35	2140.45	997.822	2017.86	2426.09	2793.23	2629.86	2507.59	3119.65	2813.53	2956.28	2731.97	2283.21	2405.48	1854.62	1242.68	1610.01	1201.9	732.786	1099.99	2221.95	4078.43	3058.32	1222.26
875.484	1569.16	1650.79	1752.89	467.953	651.451	1038.66	1038.89	1263.23	1630.37	1365.21	1507.84	1691.57	1426.35	692.006	1099.92	1560.35	2259.92	2507.65	3303.07	4282.45	3568.22	2976.83	2486.98	1936.37	1875.16	1405.92	1528.51	1936.31	2507.59	2752.45	3119.47	2976.95	2589.15	2425.97	1956.66	1548.81	1732.41	2629.8	3282.89	2507.46	1916.01	1120.28	936.807	916.386	712.59	1671.21	4180.53	3344.03	2609.57
712.488	957.227	1691.63	1426.41	1385.57	1854.87	1467.25	1099.92	977.463	1283.59	1263.17	1487.61	1875.23	1711.99	1344.72	1242.74	1746.91	1676.83	1956.79	2507.59	1895.4	2017.92	1997.57	1385.57	569.769	589.965	692.169	671.525	467.565	589.965	1079.57	1650.72	1915.82	2425.97	1956.72	1711.92	1589.59	2405.48	2731.97	2711.67	2487.17	1181.61	753.206	549.247	834.826	1711.92	1711.99	2058.64	2711.55	1977.27
[truncated: 129 more rows]
[truncated: 18 more columns]

## Sheet: C5-265-D5
C5-265-D5		WC1 Correction factor: 0.91873
[truncated: 168 more rows]
[truncated: 4 more columns]
