# Supplementary material for: Direct U–Pb dating of carbonates from micron-scale femtosecond laser ablation inductively coupled plasma mass spectrometry images using robust regression
Source: Copernicus journal article supplement (doi:10.5194/gchron-3-67-2021), 2021-02-03
Supplement: Supplementary file 1 [file gchron-3-67-2021-supplement.zip › gchron-3-67-2021-supplement-title-page.pdf]

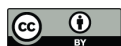

## *Supplement of*

# **Direct U–Pb dating of carbonates from micron-scale femtosecond laser ablation inductively coupled plasma mass spectrometry images using robust regression**

**Guilhem Hoareau et al.**

*Correspondence to:* Guilhem Hoareau ([guilhem.hoareau@univ-pau.fr](mailto:guilhem.hoareau@univ-pau.fr))  
and Christophe Pécheyran ([christophe.pecheyran@univ-pau.fr](mailto:christophe.pecheyran@univ-pau.fr))

- [gchron-3-67-2021-supplement-title-page.pdf](#)
- [Electronic-supplement-Hoareau-et-al-Final.xlsx](#)
- [Supplementary-material-Hoareau-et-al-Final.pdf](#)

The copyright of individual parts of the supplement might differ from the CC BY 4.0 License.
